# Supplementary material for: Artificial Neural Networks to Predict Metabolic Syndrome in Adolescents
Source: Preprints.org preprint supplement (doi:10.20944/preprints202408.1032.v1), 2024-08-15
Supplement: Supplementary file 1 [file supplementary]

## Sheet: Sheet1
escolaridade	cor	ceb	fumo	fumo_atual	audit	sexo	idade	gravidez	cc1	cc2	altura	ccmedia	imc	peso	pas_media	pad_media	ct	hdl	ldl	tg	glicemia	idade_cat	glic_cat1	cc_cat1	hdl_cat1	tg_cat1	pa_cat1	sm1	soma1	cc_cat2	glic_cat2	pa_cat2	hdl_cat2	tg_cat2	soma2	sm2	cc_cat3	glic_cat3	hdl_cat3	tg_cat3	soma3	sm3	cc_C	pa_C	glicemia_C	hdl_C	tg_C	soma_sm_C	sm_C
2	3	4	0	99	0	2	19	0	78	78.4	150	78.2	21.0391	47.338	110	83	195	65	104	131	93	2	0	0	0	0	0	0	0	0	0	0	0	1	1	0	0	0	0	1	1	0	0	1	0	0	1	2	0
2	3	4	1	0	14	1	18	0	84.8	85	182	84.9	22.5329	74.638	113	66	95	30	50	74	87	1	0	0	1	0	0	0	1	0	0	0	1	0	1	0	0	0	1	0	1	0	0	0	0	1	0	1	0
2	2	4	1	0	16	1	18	0	80.1	80.4	164	80.25	21.7776	58.573	124	75	176	63	91	112	77	1	0	0	0	0	0	0	0	0	0	0	0	1	1	0	0	0	0	1	1	0	0	0	0	0	1	1	0
4	2	1	0	99	0	2	18	0	64.6	64	154	64.3	15.7425	37.335	100	70	216	58	148	50	69	1	0	0	0	0	0	0	0	0	0	0	0	0	0	0	0	0	0	0	0	0	0	0	0	0	0	0	0
2	3	4	0	99	0	2	18	0	95.8	94.9	161	95.35	27.4175	71.069	125	82	129	39	78	59	64	1	0	1	1	0	0	0	1	1	0	1	1	0	3	1	1	0	1	0	3	1	1	1	0	1	0	3	1
2	3	5	0	99	0	2	18	0	62.5	62.2	154	62.35	15.7565	37.368	99	63	127	61	54	59	84	1	0	0	0	0	0	0	0	0	0	0	0	0	0	0	0	0	0	0	0	0	0	0	0	0	0	0	0
5	2	2	0	99	0	1	18	0	74.8	75.2	174	75	16.7932	50.843	102	65	127	52	61	71	57	1	0	0	0	0	0	0	0	0	0	0	0	0	0	0	0	0	0	0	0	0	0	0	0	0	0	0	0
2	4	2	0	99	0	1	18	0	77.6	76.7	177	77.15	22.2216	69.618	128	70	105	42	51	61	93	1	0	0	0	0	0	0	0	0	0	0	0	0	0	0	0	0	1	0	1	0	0	0	0	0	0	0	0
5	3	3	0	99	0	1	18	0	83.5	84.2	180	83.85	20.8318	67.495	144	64	152	36	98	91	91	1	0	0	1	0	0	0	1	0	0	0	1	0	1	0	0	0	1	0	1	0	0	1	0	1	0	2	0
2	3	2	0	99	0	1	18	0	82.9	82.4	178	82.65	23.5778	74.704	129	82	99	38	51	49	89	1	0	0	1	0	0	0	1	0	0	0	1	0	1	0	0	0	1	0	1	0	0	1	0	1	0	2	0
5	1	2	0	99	3	2	18	0	77.9	77.4	163	77.65	24.0577	63.919	107	61	133	54	65	71	86	1	0	0	0	0	0	0	0	0	0	0	0	0	0	0	0	0	0	0	0	0	0	0	0	0	0	0	0
2	1	5	0	99	7	1	19	0	80.7	80.5	172	80.6	21.1496	62.569	132	79	126	54	60	61	87	2	0	0	0	0	0	0	0	0	0	0	0	0	0	0	0	0	0	0	0	0	0	1	0	0	0	1	0
2	3	1	0	99	0	1	18	0	71.5	70.9	190	71.2	17.7615	64.119	120	77	132	37	81	70	87	1	0	0	1	0	0	0	1	0	0	0	1	0	1	0	0	0	1	0	1	0	0	0	0	1	0	1	0
9	3	1	0	99	0	1	18	0	93.7	94	179	93.85	22.9085	73.401	127	76	205	43	150	60	73	1	0	0	0	0	0	0	0	0	0	0	0	0	0	0	1	0	1	0	2	0	0	0	0	0	0	0	0
2	2	99	0	99	8	1	18	0	86.3	86.2	185	86.25	25.1641	86.124	126	72	136	74	54	41	77	1	0	0	0	0	0	0	0	0	0	0	0	0	0	0	0	0	0	0	0	0	0	0	0	0	0	0	0
2	2	3	1	0	9	1	18	0	82.7	82.7	174	82.7	18.1375	54.913	119	78	165	32	113	101	87	1	0	0	1	0	0	0	1	0	0	0	1	0	1	0	0	0	1	1	2	0	0	0	0	1	0	1	0
2	1	2	0	99	0	1	18	0	80.6	81	177	80.8	17.9559	56.254	112	66	149	35	90	118	90	1	0	0	1	0	0	0	1	0	0	0	1	1	2	0	0	0	1	1	2	0	0	0	0	1	1	2	0
2	3	1	1	1	22	2	18	0	86.2	85.4	170	85.8	23.3848	67.582	116	76	171	54	94	113	70	1	0	1	0	0	0	0	0	0	0	0	0	1	1	0	1	0	0	1	2	0	0	0	0	0	1	1	0
4	2	3	0	99	0	1	18	0	82.9	83	165	82.95	25.1791	68.55	132	68	117	42	64	54	90	1	0	0	0	0	0	0	0	0	0	0	0	0	0	0	0	0	1	0	1	0	0	1	0	0	0	1	0
5	3	4	0	99	0	2	18	0	60.7	61.6	160	61.15	17.3941	44.529	109	76	148	41	92	74	84	1	0	0	1	0	0	0	1	0	0	0	0	0	0	0	0	0	1	0	1	0	0	0	0	0	0	0	0
2	3	4	0	99	6	2	18	0	84.5	85.4	152	84.95	29.2707	67.627	123	75	174	54	90	149	85	1	0	1	0	0	0	0	0	0	0	0	0	1	1	0	1	0	0	1	2	0	0	0	0	0	1	1	0
5	1	3	0	99	5	2	18	0	76.9	76.6	160	76.75	22.0555	56.462	114	77	125	45	68	60	78	1	0	0	1	0	0	0	1	0	0	0	0	0	0	0	0	0	1	0	1	0	0	0	0	0	0	0	0
2	3	1	1	0	7	1	18	0	91.3	91.3	181	91.3	24.4593	80.131	129	80	224	52	150	110	86	1	0	0	0	0	0	0	0	0	0	0	0	1	1	0	1	0	0	1	2	0	0	1	0	0	1	2	0
5	3	4	0	99	0	1	18	0	75.6	75.1	169	75.35	18.3313	52.356	106	68	110	44	49	85	101	1	1	0	0	0	0	0	1	0	0	0	0	0	0	0	0	0	1	0	1	0	0	0	0	0	0	0	0
2	2	3	1	0	7	1	18	0	75.8	75.9	172	75.85	19.8952	58.858	115	80	117	38	69	48	84	1	0	0	1	0	0	0	1	0	0	0	1	0	1	0	0	0	1	0	1	0	0	1	0	1	0	2	0
1	3	4	0	99	7	1	18	0	80.9	80	168	80.45	20.0935	56.712	128	75	94	53	32	47	131	1	1	0	0	0	0	0	1	0	1	0	0	0	1	0	0	1	0	0	1	0	0	0	1	0	0	1	0
2	1	4	0	99	0	1	18	0	73.4	74.1	168	73.75	17.6566	49.834	115	76	209	56	137	80	92	1	0	0	0	0	0	0	0	0	0	0	0	0	0	0	0	0	0	0	0	0	0	0	0	0	0	0	0
2	3	4	0	99	0	2	18	0	71	70.1	165	70.55	16.8551	45.888	100	65	183	64	107	61	84	1	0	0	0	0	0	0	0	0	0	0	0	0	0	0	0	0	0	0	0	0	0	0	0	0	0	0	0
2	3	3	0	99	0	2	18	0	59.3	58.6	163	58.95	14.9381	39.689	112	77	156	53	82	105	87	1	0	0	0	0	0	0	0	0	0	0	0	0	0	0	0	0	0	1	1	0	0	0	0	0	0	0	0
2	2	5	0	99	10	1	18	0	68.8	69.6	171	69.2	17.8096	52.077	115	69	131	42	73	80	81	1	0	0	0	0	0	0	0	0	0	0	0	0	0	0	0	0	1	0	1	0	0	0	0	0	0	0	0
2	3	99	0	99	0	1	19	0	80.4	80.3	176.5	80.35	19.1033	59.511	105	67	119	37	56	129	100	2	1	0	1	0	0	0	2	0	0	0	1	1	2	0	0	0	1	1	2	0	0	0	0	1	1	2	0
2	3	5	0	99	0	1	18	0	82.9	83.5	166	83.2	22.0943	60.883	115	78	140	38	89	63	81	1	0	0	1	0	0	0	1	0	0	0	1	0	1	0	0	0	1	0	1	0	0	0	0	1	0	1	0
2	3	2	0	99	2	1	18	0	87.8	87.6	177	87.7	22.9723	71.97	136	74	178	45	105	138	89	1	0	0	0	0	0	0	0	0	0	0	0	1	1	0	0	0	0	1	1	0	0	1	0	0	1	2	0
2	99	3	0	99	0	2	18	0	74.8	75.2	154	75	21.0057	49.817	104	70	141	55	76	52	85	1	0	0	0	0	0	0	0	0	0	0	0	0	0	0	0	0	0	0	0	0	0	0	0	0	0	0	0
5	3	2	0	99	0	2	18	0	106.8	106.3	166	106.55	38.5444	106.213	123	76	119	46	52	104	87	1	0	1	1	0	0	0	1	1	0	0	0	0	1	0	1	0	1	1	3	1	1	0	0	0	0	1	0
5	3	2	0	99	0	1	18	0	75.2	74.5	181	74.85	16.5096	54.087	127	89	134	58	61	77	78	1	0	0	0	0	0	0	0	0	0	0	0	0	0	0	0	0	0	0	0	0	0	1	0	0	0	1	0
5	2	3	0	99	0	2	18	0	77.2	77.5	159	77.35	19.697	49.796	108	77	159	55	89	75	79	1	0	0	0	0	0	0	0	0	0	0	0	0	0	0	0	0	0	0	0	0	0	0	0	0	0	0	0
2	3	4	0	99	0	2	18	0	101.8	102.4	174	102.1	28.402	85.99	108	66	137	45	84	41	80	1	0	1	1	0	0	0	1	1	0	0	0	0	1	0	1	0	1	0	2	0	1	0	0	0	0	1	0
2	1	4	0	99	0	1	18	0	85.7	85.8	172	85.75	21.1236	62.492	110	64	116	48	56	60	88	1	0	0	0	0	0	0	0	0	0	0	0	0	0	0	0	0	0	0	0	0	0	0	0	0	0	0	0
2	3	3	0	99	0	1	18	0	75.8	75.7	160	75.75	19.0711	48.822	114	66	146	52	82	59	88	1	0	0	0	0	0	0	0	0	0	0	0	0	0	0	0	0	0	0	0	0	0	0	0	0	0	0	0
2	1	2	0	99	1	1	18	0	79.9	80.6	182	80.25	19.024	63.015	115	68	150	48	81	105	73	1	0	0	0	0	0	0	0	0	0	0	0	0	0	0	0	0	0	1	1	0	0	0	0	0	0	0	0
2	3	4	0	99	4	1	18	0	85	84	170	84.5	23.2453	67.179	120	72	136	51	72	67	92	1	0	0	0	0	0	0	0	0	0	0	0	0	0	0	0	0	0	0	0	0	0	0	0	0	0	0	0
5	3	0	0	99	11	1	18	0	86.4	86	182	86.2	21.4325	70.993	122	79	177	46	103	138	88	1	0	0	0	0	0	0	0	0	0	0	0	1	1	0	0	0	0	1	1	0	0	0	0	0	1	1	0
5	2	4	0	99	0	2	18	0	89.3	89	160	89.15	27.1895	69.605	125	78	189	72	105	62	93	1	0	1	0	0	0	0	0	0	0	0	0	0	0	0	1	0	0	0	1	0	0	0	0	0	0	0	0
2	2	4	0	99	4	1	18	0	82.1	82.9	172	82.5	22.0971	65.372	138	80	124	30	76	89	76	1	0	0	1	0	0	0	1	0	0	0	1	0	1	0	0	0	1	0	1	0	0	1	0	1	0	2	0
2	3	99	0	99	2	2	18	0	92.8	93	166	92.9	24.4121	67.27	133	88	148	50	85	67	87	1	0	1	0	0	1	0	1	1	0	1	0	0	2	0	1	0	0	0	2	0	1	1	0	0	0	2	0
2	1	2	0	99	0	1	18	0	92.6	92	181	92.3	27.3673	89.658	146	84	128	33	74	106	87	1	0	0	1	0	0	0	1	0	0	1	1	0	2	0	1	0	1	1	4	1	0	1	0	1	0	2	0
2	3	5	0	99	16	2	18	0	66.9	67.6	153	67.25	15.9076	37.238	102	70	170	60	97	63	84	1	0	0	0	0	0	0	0	0	0	0	0	0	0	0	0	0	0	0	0	0	0	0	0	0	0	0	0
2	3	1	1	0	0	1	18	0	91.8	91.9	180	91.85	24.9429	80.815	124	71	127	36	79	60	92	1	0	0	1	0	0	0	1	0	0	0	1	0	1	0	1	0	1	0	2	0	0	0	0	1	0	1	0
5	3	2	0	99	6	1	18	0	87.4	86.6	173	87	24.922	74.589	117	62	124	39	62	117	86	1	0	0	1	0	0	0	1	0	0	0	1	1	2	0	0	0	1	1	2	0	0	0	0	1	1	2	0
2	3	3	1	1	20	1	18	0	82.5	82.3	169	82.4	21.8473	62.398	117	60	144	37	88	95	78	1	0	0	1	0	0	0	1	0	0	0	1	0	1	0	0	0	1	0	1	0	0	0	0	1	0	1	0
1	1	5	1	1	7	1	18	0	78.7	79.4	175	79.05	18.4878	56.619	123	76	152	36	105	57	100	1	1	0	1	0	0	0	2	0	0	0	1	0	1	0	0	0	1	0	1	0	0	0	0	1	0	1	0
9	3	0	0	99	2	2	18	0	77.6	76.8	165	77.2	19.9989	54.447	117	76	156	58	82	80	90	1	0	0	0	0	0	0	0	0	0	0	0	0	0	0	0	0	0	0	0	0	0	0	0	0	0	0	0
5	3	2	0	99	0	2	18	0	64.8	64.5	156	64.65	16.4986	40.151	99	63	135	72	52	53	90	1	0	0	0	0	0	0	0	0	0	0	0	0	0	0	0	0	0	0	0	0	0	0	0	0	0	0	0
2	1	2	0	99	10	1	18	0	79	79.2	169	79.1	20.4338	58.361	117	57	144	35	90	94	81	1	0	0	1	0	0	0	1	0	0	0	1	0	1	0	0	0	1	0	1	0	0	0	0	1	0	1	0
4	1	2	0	99	0	1	18	0	85.8	86	174	85.9	21.8873	66.266	135	77	183	49	102	158	73	1	0	0	0	1	0	0	1	0	0	0	0	1	1	0	0	0	0	1	1	0	0	1	0	0	1	2	0
3	1	1	0	99	0	1	18	0	84.6	85	178	84.8	19.9265	63.135	133	86	172	52	100	101	81	1	0	0	0	0	1	0	1	0	0	0	0	0	0	0	0	0	0	1	1	0	0	1	0	0	0	1	0
2	3	99	0	99	0	2	18	0	69.6	69.4	159	69.5	16.9621	42.882	110	76	152	56	82	69	95	1	0	0	0	0	0	0	0	0	0	0	0	0	0	0	0	0	0	0	0	0	0	0	0	0	0	0	0
2	3	2	0	99	0	2	18	0	71.1	71.5	159	71.3	16.4562	41.603	101	59	170	71	82	85	109	1	1	0	0	0	0	0	1	0	0	0	0	0	0	0	0	0	0	0	0	0	0	0	0	0	0	0	0
2	2	3	0	99	0	1	18	0	83	83.8	175.7	83.4	20.6301	63.686	110	68	161	87	60	68	77	1	0	0	0	0	0	0	0	0	0	0	0	0	0	0	0	0	0	0	0	0	0	0	0	0	0	0	0
2	3	0	0	99	2	1	18	0	87.1	87.7	174	87.4	21.9907	66.579	112	68	147	38	92	87	90	1	0	0	1	0	0	0	1	0	0	0	1	0	1	0	0	0	1	0	1	0	0	0	0	1	0	1	0
2	3	4	0	99	0	1	18	0	85.9	85.8	179	85.85	22.3161	71.503	129	77	165	26	91	240	70	1	0	0	1	1	0	0	2	0	0	0	1	1	2	0	0	0	1	1	2	0	0	0	0	1	1	2	0
2	3	99	0	99	3	1	18	0	77.8	77.5	174	77.65	18.908	57.246	123	75	162	53	85	121	81	1	0	0	0	0	0	0	0	0	0	0	0	1	1	0	0	0	0	1	1	0	0	0	0	0	1	1	0
5	3	4	0	99	0	2	18	0	87	87.7	167	87.35	25.6198	71.451	122	60	152	78	53	104	91	1	0	1	0	0	0	0	0	0	0	0	0	0	0	0	1	0	0	1	2	0	0	0	0	0	0	0	0
2	3	99	0	99	0	1	18	0	73.3	74	167	73.65	18.1484	50.614	119	72	173	28	117	142	102	1	1	0	1	0	0	0	2	0	0	0	1	1	2	0	0	0	1	1	2	0	0	0	0	1	1	2	0
2	3	3	0	99	10	2	18	0	64.8	64.5	160	64.65	16.5703	42.42	94	56	177	64	98	73	81	1	0	0	0	0	0	0	0	0	0	0	0	0	0	0	0	0	0	0	0	0	0	0	0	0	0	0	0
2	3	5	0	99	8	1	18	0	91.1	91.4	159	91.25	27.2062	68.78	129	78	139	32	72	173	95	1	0	0	1	1	0	0	2	0	0	0	1	1	2	0	1	0	1	1	3	1	0	0	0	1	1	2	0
2	3	5	0	99	0	1	18	0	71	71	166	71	18.277	50.364	115	63	129	33	72	118	92	1	0	0	1	0	0	0	1	0	0	0	1	1	2	0	0	0	1	1	2	0	0	0	0	1	1	2	0
2	3	3	0	99	0	2	18	0	79.2	79.6	174	79.4	19.9772	60.483	113	71	150	70	68	62	77	1	0	0	0	0	0	0	0	0	0	0	0	0	0	0	0	0	0	0	0	0	0	0	0	0	0	0	0
4	2	2	0	99	2	1	18	0	74.9	75.2	177	75.05	18.8168	58.951	122	76	129	46	72	56	107	1	1	0	0	0	0	0	1	0	0	0	0	0	0	0	0	0	0	0	0	0	0	0	0	0	0	0	0
2	3	4	0	99	0	1	18	0	74.5	74.8	183.5	74.65	17.7778	59.862	133	67	132	36	71	123	84	1	0	0	1	0	0	0	1	0	0	0	1	1	2	0	0	0	1	1	2	0	0	1	0	1	1	3	1
2	3	3	0	99	0	1	18	0	96.2	96.7	175	96.45	28.9629	88.699	125	74	120	47	64	44	89	1	0	1	0	0	0	0	0	1	0	0	0	0	1	0	1	0	0	0	1	0	1	0	0	0	0	1	0
2	2	3	0	99	15	1	18	0	75.2	75.3	174	75.25	18.1054	54.816	132	76	115	43	61	55	99	1	0	0	0	0	0	0	0	0	0	0	0	0	0	0	0	0	1	0	1	0	0	1	0	0	0	1	0
2	2	4	0	99	7	1	18	0	98.4	98.3	180	98.35	27.0778	87.732	115	74	174	51	110	66	88	1	0	1	0	0	0	0	0	1	0	0	0	0	1	0	1	0	0	0	1	0	1	0	0	0	0	1	0
2	1	99	0	99	12	1	18	0	83.4	83.7	178	83.55	21.1438	66.992	123	84	137	46	67	119	75	1	0	0	0	0	0	0	0	0	0	0	0	1	1	0	0	0	0	1	1	0	0	1	0	0	1	2	0
2	1	5	0	99	0	1	18	0	72.6	72.6	171	72.6	17.4313	50.971	107	65	150	54	85	56	66	1	0	0	0	0	0	0	0	0	0	0	0	0	0	0	0	0	0	0	0	0	0	0	0	0	0	0	0
5	3	1	0	99	17	1	18	0	80.4	81	168	80.7	20.6983	58.419	123	82	151	37	98	82	90	1	0	0	1	0	0	0	1	0	0	0	1	0	1	0	0	0	1	0	1	0	0	1	0	1	0	2	0
2	3	3	0	99	1	2	18	0	70.5	69.9	161	70.2	16.4407	42.616	104	72	133	43	67	115	92	1	0	0	1	0	0	0	1	0	0	0	0	1	1	0	0	0	1	1	2	0	0	0	0	0	1	1	0
2	3	5	0	99	5	1	18	0	71.9	72	161	71.95	18.7697	48.653	105	66	145	65	64	78	93	1	0	0	0	0	0	0	0	0	0	0	0	0	0	0	0	0	0	0	0	0	0	0	0	0	0	0	0
5	3	3	0	99	0	1	18	0	87.8	88.4	195	88.1	20.1788	76.73	109	71	179	44	110	124	96	1	0	0	0	0	0	0	0	0	0	0	0	1	1	0	1	0	1	1	3	1	0	0	0	0	1	1	0
5	3	99	0	99	2	2	18	0	98.8	98.1	174	98.45	26.3354	79.733	145	98	170	39	95	180	93	1	0	1	1	1	1	1	3	1	0	1	1	1	4	1	1	0	1	1	4	1	1	1	0	1	1	4	1
5	3	3	0	99	0	1	18	0	98.8	98.6	176	98.7	24.1397	74.775	134	78	229	55	155	94	90	1	0	1	0	0	0	0	0	1	0	0	0	0	1	0	1	0	0	0	1	0	1	1	0	0	0	2	0
2	2	3	0	99	0	1	18	0	81.8	82.5	175	82.15	21.888	67.032	115	60	135	29	85	103	84	1	0	0	1	0	0	0	1	0	0	0	1	0	1	0	0	0	1	1	2	0	0	0	0	1	0	1	0
2	3	4	0	99	9	1	18	0	123	123	173	123	36.1185	108.099	139	82	192	31	105	278	110	1	1	1	1	1	0	1	3	1	1	0	1	1	4	1	1	1	1	1	4	1	1	1	1	1	1	5	1
10	3	5	0	99	0	1	18	0	83.2	83.7	163	83.45	22.2406	59.091	125	72	133	35	85	65	82	1	0	0	1	0	0	0	1	0	0	0	1	0	1	0	0	0	1	0	1	0	0	0	0	1	0	1	0
2	1	4	0	99	14	2	18	0	84.4	84.8	160	84.6	21.7203	55.604	115	72	106	39	51	82	97	1	0	1	1	0	0	0	1	0	0	0	1	0	1	0	1	0	1	0	2	0	0	0	0	1	0	1	0
5	3	1	0	99	0	2	18	0	79.1	78.6	163	78.85	22.8044	60.589	104	70	138	35	89	72	81	1	0	0	1	0	0	0	1	0	0	0	1	0	1	0	0	0	1	0	1	0	0	0	0	1	0	1	0
2	1	2	1	1	12	2	18	0	85.1	86	163	85.55	22.7976	60.571	104	69	156	60	75	105	74	1	0	1	0	0	0	0	0	0	0	0	0	0	0	0	1	0	0	1	2	0	0	0	0	0	0	0	0
5	3	1	0	99	4	2	18	0	98.9	99.7	167	99.3	29.8516	83.253	119	74	106	41	52	67	76	1	0	1	1	0	0	0	1	1	0	0	0	0	1	0	1	0	1	0	2	0	1	0	0	0	0	1	0
2	3	99	0	99	1	2	18	0	102.2	102.3	173	102.25	28.7043	85.909	116	80	197	38	136	116	79	1	0	1	1	0	0	0	1	1	0	0	1	1	3	1	1	0	1	1	3	1	1	1	0	1	1	4	1
2	3	3	0	99	0	1	18	0	69.3	69.4	171	69.35	14.8832	43.52	108	66	130	54	63	63	89	1	0	0	0	0	0	0	0	0	0	0	0	0	0	0	0	0	0	0	0	0	0	0	0	0	0	0	0
2	1	2	0	99	0	1	18	0	83.7	84.6	179	84.15	23.2671	74.55	132	66	162	49	90	116	92	1	0	0	0	0	0	0	0	0	0	0	0	1	1	0	0	0	0	1	1	0	0	1	0	0	1	2	0
5	3	2	0	99	1	1	18	0	76.5	76.5	172	76.5	18.8957	55.901	132	94	145	45	87	67	87	1	0	0	0	0	1	0	1	0	0	1	0	0	1	0	0	0	0	0	1	0	0	1	0	0	0	1	0
2	3	3	0	99	4	1	18	0	82.2	83	173	82.6	22.2453	66.578	128	70	165	53	92	98	94	1	0	0	0	0	0	0	0	0	0	0	0	0	0	0	0	0	0	0	0	0	0	0	0	0	0	0	0
5	3	99	0	99	0	1	18	0	76.2	75.5	177	75.85	18.6951	58.57	120	77	183	42	122	97	89	1	0	0	0	0	0	0	0	0	0	0	0	0	0	0	0	0	1	0	1	0	0	0	0	0	0	0	0
5	1	1	0	99	6	2	19	0	84.3	83.9	164.5	84.1	25.0515	67.79	115	82	223	42	163	88	91	2	0	1	1	0	0	0	1	0	0	0	0	0	0	0	0	0	1	0	1	0	0	1	0	0	0	1	0
10	3	4	0	99	0	1	18	0	79.8	79.4	169	79.6	22.3868	63.939	107	70	154	46	96	59	132	1	1	0	0	0	0	0	1	0	1	0	0	0	1	0	0	1	0	0	1	0	0	0	1	0	0	1	0
5	3	0	0	99	0	1	19	0	91.7	91.5	181	91.6	23.8006	77.973	126	62	104	53	30	107	77	2	0	0	0	0	0	0	0	0	0	0	0	0	0	0	1	0	0	1	2	0	0	0	0	0	0	0	0
2	1	3	0	99	0	1	18	0	109.7	109.8	193	109.75	29.6588	110.476	116	70	129	34	72	114	83	1	0	1	1	0	0	0	1	1	0	0	1	1	3	1	1	0	1	1	3	1	1	0	0	1	1	3	1
2	2	4	0	99	0	1	18	0	104.9	104.8	184	104.85	29.1691	98.755	159	91	147	39	82	129	67	1	0	1	1	0	1	1	2	1	0	1	1	1	4	1	1	0	1	1	4	1	1	1	0	1	1	4	1
2	3	99	1	1	10	1	18	0	75.7	75.9	172	75.8	16.9899	50.263	99	64	205	44	128	166	323	1	1	0	0	1	0	0	2	0	1	0	0	1	2	0	0	1	1	1	3	1	0	0	1	0	1	2	0
2	3	4	0	99	0	2	18	0	79	79.5	149	79.25	21.5243	47.786	100	65	167	45	93	146	68	1	0	0	1	0	0	0	1	0	0	0	0	1	1	0	0	0	1	1	2	0	0	0	0	0	1	1	0
2	3	4	0	99	10	1	18	0	81.5	82.5	178	82	20.3213	64.386	119	83	152	50	88	69	96	1	0	0	0	0	0	0	0	0	0	0	0	0	0	0	0	0	0	0	0	0	0	1	0	0	0	1	0
2	1	5	0	99	7	1	18	0	77.7	78.3	170	78	19.4131	56.104	107	60	111	39	63	46	92	1	0	0	1	0	0	0	1	0	0	0	1	0	1	0	0	0	1	0	1	0	0	0	0	1	0	1	0
2	3	4	0	99	6	2	18	0	77.4	77.8	157	77.6	20.7278	51.092	102	65	142	42	85	73	69	1	0	0	1	0	0	0	1	0	0	0	0	0	0	0	0	0	1	0	1	0	0	0	0	0	0	0	0
2	3	4	0	99	0	2	18	0	71.7	72.5	155	72.1	20.7921	49.953	95	68	109	45	52	58	83	1	0	0	1	0	0	0	1	0	0	0	0	0	0	0	0	0	1	0	1	0	0	0	0	0	0	0	0
2	3	4	0	99	0	1	19	0	90.4	91.1	168	90.75	27.1344	76.584	129	73	136	29	74	163	93	2	0	0	1	1	0	0	2	0	0	0	1	1	2	0	1	0	1	1	3	1	0	0	0	1	1	2	0
10	3	3	0	99	12	2	18	0	66.4	65.6	165	66	16.1803	44.051	113	65	154	62	73	97	104	1	1	0	0	0	0	0	1	0	0	0	0	0	0	0	0	0	0	0	0	0	0	0	0	0	0	0	0
2	3	3	0	99	0	1	18	0	85.5	84.7	175	85.1	21.7773	66.693	143	60	139	43	79	83	102	1	1	0	0	0	0	0	1	0	0	0	0	0	0	0	0	0	1	0	1	0	0	1	0	0	0	1	0
2	3	2	0	99	0	1	18	0	81.9	81.7	164	81.8	22.2026	59.716	130	77	160	47	92	103	99	1	0	0	0	0	0	0	0	0	0	0	0	0	0	0	0	0	0	1	1	0	0	0	0	0	0	0	0
2	3	3	0	99	3	2	18	0	79	78.8	160	78.9	21.4641	54.948	113	66	145	47	84	68	82	1	0	0	1	0	0	0	1	0	0	0	0	0	0	0	0	0	1	0	1	0	0	0	0	0	0	0	0
2	1	5	1	0	0	1	19	0	81.2	81.2	168	81.2	22.0801	62.319	125	68	152	40	152	58	89	2	0	0	0	0	0	0	0	0	0	0	1	0	1	0	0	0	1	0	1	0	0	0	0	1	0	1	0
2	3	5	0	99	6	1	18	0	88	88.5	175	88.25	23.5647	72.167	136	84	190	48	124	88	93	1	0	0	0	0	0	0	0	0	0	1	0	0	1	0	1	0	0	0	2	0	0	1	0	0	0	1	0
2	1	2	0	99	0	1	18	0	84.7	84	160	84.35	20.0062	51.216	99	67	123	47	67	43	82	1	0	0	0	0	0	0	0	0	0	0	0	0	0	0	0	0	0	0	0	0	0	0	0	0	0	0	0
5	3	2	1	0	12	1	18	0	82.4	81.9	172	82.15	21.5123	63.642	124	80	131	39	69	117	97	1	0	0	1	0	0	0	1	0	0	0	1	1	2	0	0	0	1	1	2	0	0	1	0	1	1	3	1
2	3	2	0	99	8	1	18	0	78.3	79	171	78.65	19.3044	56.448	121	74	146	51	77	89	80	1	0	0	0	0	0	0	0	0	0	0	0	0	0	0	0	0	0	0	0	0	0	0	0	0	0	0	0
2	3	3	1	0	12	1	19	0	92.1	91.6	188	91.85	22.9623	81.158	138	79	132	36	68	141	89	2	0	0	1	0	0	0	1	0	0	0	1	1	2	0	1	0	1	1	3	1	0	1	0	1	1	3	1
2	3	5	0	99	0	2	18	0	79.4	79.2	159	79.3	20.7413	52.436	104	70	99	42	43	71	71	1	0	0	1	0	0	0	1	0	0	0	0	0	0	0	0	0	1	0	1	0	0	0	0	0	0	0	0
2	3	5	0	99	0	2	18	0	89	88.6	163	88.8	26.8934	71.453	119	82	158	47	92	96	92	1	0	1	1	0	0	0	1	0	0	1	0	0	1	0	1	0	1	0	3	1	0	1	0	0	0	1	0
2	3	4	0	99	0	2	18	0	80.3	80.1	157	80.2	25.1953	62.104	122	69	122	49	61	58	76	1	0	1	1	0	0	0	1	0	0	0	0	0	0	0	0	0	1	0	1	0	0	0	0	0	0	0	0
2	3	3	0	99	7	2	18	0	79.3	78.7	153	79	23.2718	54.477	117	66	118	51	58	44	78	1	0	0	0	0	0	0	0	0	0	0	0	0	0	0	0	0	0	0	0	0	0	0	0	0	0	0	0
2	3	2	0	99	14	1	18	0	76.9	76.6	173	76.75	18.2352	54.576	116	74	131	51	56	118	84	1	0	0	0	0	0	0	0	0	0	0	0	1	1	0	0	0	0	1	1	0	0	0	0	0	1	1	0
10	3	3	0	99	0	1	18	0	94.8	95	170	94.9	26.0325	75.234	130	80	183	43	115	126	100	1	1	1	0	0	0	0	1	1	0	0	0	1	2	0	1	0	1	1	3	1	1	1	0	0	1	3	1
2	3	5	0	99	0	2	19	0	82.8	82	159	82.4	23.5149	59.448	120	86	195	58	108	146	80	2	0	1	0	0	0	0	0	0	0	0	0	1	1	0	0	0	0	1	1	0	0	1	0	0	1	2	0
2	2	3	0	99	0	2	18	0	93.3	93.2	166	93.25	22.4303	61.809	130	87	149	75	64	48	74	1	0	1	0	0	1	0	1	1	0	1	0	0	2	0	1	0	0	0	2	0	1	1	0	0	0	2	0
2	1	3	0	99	0	1	19	0	91.2	90.5	188	90.85	23.267	82.235	128	76	128	44	72	62	89	2	0	0	0	0	0	0	0	0	0	0	0	0	0	0	1	0	1	0	2	0	0	0	0	0	0	0	0
2	3	3	0	99	0	1	19	0	88.8	88.7	164	88.75	25.3532	68.19	111	66	186	30	125	153	99	2	0	0	1	1	0	0	2	0	0	0	1	1	2	0	0	0	1	1	2	0	0	0	0	1	1	2	0
2	1	4	0	99	0	1	18	0	86.4	86.6	164	86.5	23.2217	62.457	130	86	236	39	159	191	93	1	0	0	1	1	1	0	3	0	0	0	1	1	2	0	0	0	1	1	2	0	0	1	0	1	1	3	1
2	1	4	0	99	4	1	18	0	107.9	107.7	174	107.8	33.7241	102.103	128	76	236	38	172	130	86	1	0	1	1	0	0	0	1	1	0	0	1	1	3	1	1	0	1	1	3	1	1	0	0	1	1	3	1
4	3	2	0	99	0	2	19	0	76.5	76.4	164	76.45	18.7128	50.33	92	62	121	40	66	77	90	2	0	0	1	0	0	0	1	0	0	0	1	0	1	0	0	0	1	0	1	0	0	0	0	1	0	1	0
2	1	0	0	99	2	1	18	0	71.7	72.2	166	71.95	18.4123	50.737	104	65	165	49	99	87	72	1	0	0	0	0	0	0	0	0	0	0	0	0	0	0	0	0	0	0	0	0	0	0	0	0	0	0	0
5	3	3	0	99	14	1	18	0	94.5	94.3	179	94.4	25.4071	81.407	136	77	121	27	47	234	89	1	0	1	1	1	0	1	2	0	0	0	1	1	2	0	1	0	1	1	3	1	0	1	0	1	1	3	1
5	3	4	0	99	5	1	18	0	97.3	97.7	179	97.5	31.2971	100.279	138	67	110	54	42	69	99	1	0	1	0	0	0	0	0	1	0	0	0	0	1	0	1	0	0	0	1	0	1	1	0	0	0	2	0
2	3	4	0	99	0	1	18	0	92.5	92.3	176	92.4	25.6786	79.542	127	77	171	55	93	113	102	1	1	0	0	0	0	0	1	0	0	0	0	1	1	0	1	0	0	1	2	0	0	0	0	0	1	1	0
2	3	3	1	0	0	1	18	0	89.2	89.3	165	89.25	27.3039	74.335	139	78	154	59	85	49	80	1	0	0	0	0	0	0	0	0	0	0	0	0	0	0	1	0	0	0	1	0	0	1	0	0	0	1	0
4	2	5	0	99	3	2	18	0	77.2	77.1	162	77.15	19.5965	51.429	124	75	157	83	61	67	93	1	0	0	0	0	0	0	0	0	0	0	0	0	0	0	0	0	0	0	0	0	0	0	0	0	0	0	0
2	2	4	0	99	3	1	18	0	88.2	88.7	182	88.45	22.3771	74.122	111	68	115	35	57	113	105	1	1	0	1	0	0	0	2	0	0	0	1	1	2	0	1	0	1	1	3	1	0	0	0	1	1	2	0
2	3	99	0	99	11	1	18	0	83.8	83.9	170	83.85	23.0754	66.688	133	66	120	39	69	59	81	1	0	0	1	0	0	0	1	0	0	0	1	0	1	0	0	0	1	0	1	0	0	1	0	1	0	2	0
2	3	3	0	99	0	1	18	0	88.2	88.1	176	88.15	24.1426	74.784	121	79	183	39	108	181	78	1	0	0	1	1	0	0	2	0	0	0	1	1	2	0	1	0	1	1	3	1	0	0	0	1	1	2	0
2	3	99	1	0	9	1	18	0	76.2	76.7	182	76.45	18.2427	60.427	123	71	137	32	86	95	83	1	0	0	1	0	0	0	1	0	0	0	1	0	1	0	0	0	1	0	1	0	0	0	0	1	0	1	0
2	2	99	0	99	0	1	18	0	72	72.3	171	72.15	20.2804	59.302	130	88	98	40	28	152	90	1	0	0	0	1	1	0	2	0	0	0	1	1	2	0	0	0	1	1	2	0	0	1	0	1	1	3	1
2	3	5	0	99	0	1	18	0	73	72.1	159	72.55	18.0752	45.696	116	67	122	37	66	96	100	1	1	0	1	0	0	0	2	0	0	0	1	0	1	0	0	0	1	0	1	0	0	0	0	1	0	1	0
2	3	5	0	99	0	1	18	0	70	69.6	162	69.8	17.1529	45.016	114	66	144	51	74	95	85	1	0	0	0	0	0	0	0	0	0	0	0	0	0	0	0	0	0	0	0	0	0	0	0	0	0	0	0
10	3	5	0	99	0	1	18	0	74.6	74.5	161	74.55	19.2527	49.905	111	68	139	50	78	54	99	1	0	0	0	0	0	0	0	0	0	0	0	0	0	0	0	0	0	0	0	0	0	0	0	0	0	0	0
2	1	2	0	99	17	1	18	0	94	94	176	94	28.1796	87.289	130	77	201	39	118	221	99	1	0	1	1	1	0	1	2	0	0	0	1	1	2	0	1	0	1	1	3	1	0	0	0	1	1	2	0
2	2	4	0	99	0	1	18	0	79.7	79.8	174	79.75	22.1902	67.183	123	67	166	48	100	90	85	1	0	0	0	0	0	0	0	0	0	0	0	0	0	0	0	0	0	0	0	0	0	0	0	0	0	0	0
4	1	1	0	99	5	1	18	0	88.2	87.5	193	87.85	20.7772	77.393	125	77	141	52	76	64	90	1	0	0	0	0	0	0	0	0	0	0	0	0	0	0	1	0	0	0	1	0	0	0	0	0	0	0	0
2	2	5	0	99	0	2	18	0	67.1	67.4	152	67.25	16.7677	38.74	98	65	131	46	72	65	94	1	0	0	1	0	0	0	1	0	0	0	0	0	0	0	0	0	1	0	1	0	0	0	0	0	0	0	0
2	3	3	0	99	4	1	18	0	101.5	101.1	177	101.3	29.1924	91.457	130	80	203	44	141	92	94	1	0	1	0	0	0	0	0	1	0	0	0	0	1	0	1	0	1	0	2	0	1	1	0	0	0	2	0
2	3	99	0	99	0	2	18	0	74.7	75.5	153	75.1	18.1691	42.532	95	64	209	44	136	143	91	1	0	0	1	0	0	0	1	0	0	0	0	1	1	0	0	0	1	1	2	0	0	0	0	0	1	1	0
5	1	0	0	99	4	2	18	0	74.7	75	169	74.85	18.5676	53.031	100	59	206	61	135	51	74	1	0	0	0	0	0	0	0	0	0	0	0	0	0	0	0	0	0	0	0	0	0	0	0	0	0	0	0
2	3	3	0	99	0	2	18	0	71	71.1	163	71.05	19.3206	51.333	108	76	96	26	58	61	88	1	0	0	1	0	0	0	1	0	0	0	1	0	1	0	0	0	1	0	1	0	0	0	0	1	0	1	0
2	3	3	0	99	12	1	18	0	82.8	82.1	181	82.45	20.0217	65.593	120	79	127	47	68	61	88	1	0	0	0	0	0	0	0	0	0	0	0	0	0	0	0	0	0	0	0	0	0	0	0	0	0	0	0
2	3	1	0	99	1	2	18	0	77.5	76.6	157	77.05	21.2025	52.262	103	69	151	62	79	50	90	1	0	0	0	0	0	0	0	0	0	0	0	0	0	0	0	0	0	0	0	0	0	0	0	0	0	0	0
2	3	2	0	99	3	2	18	0	78.1	77.3	165	77.7	20.6303	56.166	92	57	156	51	96	45	73	1	0	0	0	0	0	0	0	0	0	0	0	0	0	0	0	0	0	0	0	0	0	0	0	0	0	0	0
5	1	2	0	99	1	1	18	0	72	72	184	72	18.5128	62.677	118	67	137	35	88	72	79	1	0	0	1	0	0	0	1	0	0	0	1	0	1	0	0	0	1	0	1	0	0	0	0	1	0	1	0
5	2	3	0	99	13	1	18	0	80.3	80.9	168	80.6	22.0709	62.293	138	77	169	48	107	71	80	1	0	0	0	0	0	0	0	0	0	0	0	0	0	0	0	0	0	0	0	0	0	1	0	0	0	1	0
2	3	99	0	99	0	1	18	0	99.5	100	177	99.75	28.2604	88.537	149	76	112	28	60	121	92	1	0	1	1	0	0	0	1	1	0	0	1	1	3	1	1	0	1	1	3	1	1	1	0	1	1	4	1
2	3	1	0	99	2	1	18	0	81.3	81.1	161	81.2	23.0188	59.667	106	64	148	36	89	116	90	1	0	0	1	0	0	0	1	0	0	0	1	1	2	0	0	0	1	1	2	0	0	0	0	1	1	2	0
5	2	5	0	99	0	2	18	0	74.7	73.7	167	74.2	19.0064	53.007	110	71	157	74	67	79	84	1	0	0	0	0	0	0	0	0	0	0	0	0	0	0	0	0	0	0	0	0	0	0	0	0	0	0	0
2	1	3	1	0	8	2	19	0	72.3	73.1	160	72.7	18.3086	46.87	98	65	169	40	112	85	94	2	0	0	1	0	0	0	1	0	0	0	1	0	1	0	0	0	1	0	1	0	0	0	0	1	0	1	0
5	1	2	0	99	0	2	19	0	84.5	85.1	161	84.8	26.6274	69.021	102	68	123	58	54	53	106	2	1	1	0	0	0	0	1	0	0	0	0	0	0	0	0	0	0	0	0	0	0	0	0	0	0	0	0
2	3	3	0	99	0	1	19	0	82.5	82.8	174	82.65	20.0268	60.633	114	65	134	41	76	85	95	2	0	0	0	0	0	0	0	0	0	0	0	0	0	0	0	0	1	0	1	0	0	0	0	0	0	0	0
4	3	99	0	99	0	2	18	0	101.8	101.9	174	101.85	30.5182	92.397	161	109	138	35	65	188	163	1	1	1	1	1	1	1	4	1	1	1	1	1	5	1	1	1	1	1	5	1	1	1	1	1	1	5	1
2	1	3	1	0	14	2	18	0	78	78.1	167	78.05	22.2339	62.008	107	74	140	49	72	94	91	1	0	0	1	0	0	0	1	0	0	0	0	0	0	0	0	0	1	0	1	0	0	0	0	0	0	0	0
2	3	99	0	99	0	2	19	0	90.4	90	171	90.2	25.2067	73.707	111	75	108	42	57	44	98	2	0	1	1	0	0	0	1	0	0	0	0	0	0	0	1	0	1	0	2	0	0	0	0	0	0	0	0
2	3	2	0	99	5	1	18	0	95.5	94.8	180	95.15	26.1679	84.784	150	69	116	33	70	67	89	1	0	1	1	0	0	0	1	1	0	0	1	0	2	0	1	0	1	0	2	0	1	1	0	1	0	3	1
2	1	4	0	99	0	1	18	0	86.7	86.6	176	86.65	23.9876	74.304	121	73	150	46	91	67	77	1	0	0	0	0	0	0	0	0	0	0	0	0	0	0	0	0	0	0	0	0	0	0	0	0	0	0	0
2	3	5	0	99	11	2	19	0	80.2	80.3	156.5	80.25	20.1603	49.377	110	69	118	28	65	124	79	2	0	1	1	0	0	0	1	0	0	0	1	1	2	0	0	0	1	1	2	0	0	0	0	1	1	2	0
2	1	4	0	99	0	1	18	0	94.2	94.2	166	94.2	26.7401	73.685	136	72	176	36	123	86	98	1	0	1	1	0	0	0	1	0	0	0	1	0	1	0	1	0	1	0	2	0	0	1	0	1	0	2	0
2	2	99	0	99	0	2	18	0	90.3	90.3	153	90.3	26.4932	62.018	123	85	188	45	114	147	79	1	0	1	1	0	0	0	1	0	0	1	0	1	2	0	1	0	1	1	4	1	0	1	0	0	1	2	0
4	2	99	0	99	0	1	19	0	74.6	74.8	178	74.7	18.7038	59.261	115	72	172	62	97	66	90	2	0	0	0	0	0	0	0	0	0	0	0	0	0	0	0	0	0	0	0	0	0	0	0	0	0	0	0
10	3	5	0	99	10	2	18	0	91.1	90.4	163	90.75	24.2294	64.375	110	69	144	44	81	94	103	1	1	1	1	0	0	1	2	0	0	0	0	0	0	0	1	0	1	0	2	0	0	0	0	0	0	0	0
2	3	2	0	99	0	1	18	0	86.2	86.1	165	86.15	24.0077	65.361	134	74	177	28	108	206	80	1	0	0	1	1	0	0	2	0	0	0	1	1	2	0	0	0	1	1	2	0	0	1	0	1	1	3	1
2	3	3	0	99	8	2	18	0	79.5	79.6	166	79.55	18.6409	51.367	111	67	168	50	106	60	82	1	0	0	0	0	0	0	0	0	0	0	0	0	0	0	0	0	0	0	0	0	0	0	0	0	0	0	0
5	3	1	0	99	4	1	18	0	88.6	89.1	180	88.85	22.6583	73.413	136	89	176	43	123	51	90	1	0	0	0	0	1	0	1	0	0	0	0	0	0	0	1	0	1	0	2	0	0	1	0	0	0	1	0
2	3	3	0	99	0	1	18	0	80	80.1	173	80.05	19.8657	59.456	120	76	160	36	101	113	95	1	0	0	1	0	0	0	1	0	0	0	1	1	2	0	0	0	1	1	2	0	0	0	0	1	1	2	0
2	3	4	0	99	7	1	18	0	79.5	79.4	180	79.45	21.3389	69.138	149	80	118	49	58	54	97	1	0	0	0	0	0	0	0	0	0	0	0	0	0	0	0	0	0	0	0	0	0	1	0	0	0	1	0
2	3	4	0	99	6	1	18	0	78.9	78.9	180	78.9	19.7417	63.963	117	66	141	53	71	85	94	1	0	0	0	0	0	0	0	0	0	0	0	0	0	0	0	0	0	0	0	0	0	0	0	0	0	0	0
10	3	5	0	99	0	1	18	0	106.4	105.8	174	106.1	29.2291	88.494	115	75	114	26	63	126	86	1	0	1	1	0	0	0	1	1	0	0	1	1	3	1	1	0	1	1	3	1	1	0	0	1	1	3	1
2	3	99	0	99	0	1	19	0	75.6	75.5	175	75.55	19.8945	60.927	138	96	224	50	158	78	64	2	0	0	0	0	1	0	1	0	0	0	0	0	0	0	0	0	0	0	0	0	0	1	0	0	0	1	0
2	1	99	0	99	0	1	19	0	82.7	83.2	170	82.95	22.4104	64.766	121	69	162	46	98	88	117	2	1	0	0	0	0	0	1	0	1	0	0	0	1	0	0	1	0	0	1	0	0	0	1	0	0	1	0
2	2	3	0	99	6	1	18	0	76.6	75.6	190	76.1	18.8006	67.87	125	78	177	41	118	88	94	1	0	0	0	0	0	0	0	0	0	0	0	0	0	0	0	0	1	0	1	0	0	0	0	0	0	0	0
2	2	3	0	99	0	1	18	0	80.3	80.9	179	80.6	18.3752	58.876	110	72	126	45	66	77	89	1	0	0	0	0	0	0	0	0	0	0	0	0	0	0	0	0	0	0	0	0	0	0	0	0	0	0	0
5	3	2	0	99	0	1	18	0	95.7	95.5	174	95.6	27.5846	83.515	131	75	183	39	116	139	93	1	0	1	1	0	0	0	1	1	0	0	1	1	3	1	1	0	1	1	3	1	1	1	0	1	1	4	1
2	3	4	1	0	0	1	18	0	81.1	80.4	176	80.75	20.4955	63.487	119	74	142	47	80	73	91	1	0	0	0	0	0	0	0	0	0	0	0	0	0	0	0	0	0	0	0	0	0	0	0	0	0	0	0
2	3	4	0	99	0	1	18	0	78.8	78.5	174	78.65	19.9656	60.448	111	66	145	44	89	61	94	1	0	0	0	0	0	0	0	0	0	0	0	0	0	0	0	0	1	0	1	0	0	0	0	0	0	0	0
2	2	5	0	99	0	1	19	0	77.8	77.8	174.5	77.8	18.3177	55.778	112	69	159	50	97	58	93	2	0	0	0	0	0	0	0	0	0	0	0	0	0	0	0	0	0	0	0	0	0	0	0	0	0	0	0
2	3	4	0	99	0	2	18	0	79.4	79.5	151	79.45	20.1241	45.885	111	78	174	55	107	58	84	1	0	0	0	0	0	0	0	0	0	0	0	0	0	0	0	0	0	0	0	0	0	0	0	0	0	0	0
5	3	99	0	99	2	2	18	0	75.6	75.1	160	75.35	19.1059	48.911	91	61	105	49	46	52	66	1	0	0	1	0	0	0	1	0	0	0	0	0	0	0	0	0	1	0	1	0	0	0	0	0	0	0	0
2	1	0	0	99	0	1	18	0	79.8	79.7	169	79.75	21.4418	61.24	122	73	101	26	66	47	92	1	0	0	1	0	0	0	1	0	0	0	1	0	1	0	0	0	1	0	1	0	0	0	0	1	0	1	0
1	2	2	0	99	0	1	18	0	96.8	96.5	163	96.65	29.7444	79.028	121	78	140	32	59	244	68	1	0	1	1	1	0	1	2	1	0	0	1	1	3	1	1	0	1	1	3	1	1	0	0	1	1	3	1
2	3	3	0	99	4	2	18	0	75.2	75.7	164	75.45	17.4082	46.821	100	62	172	61	100	54	94	1	0	0	0	0	0	0	0	0	0	0	0	0	0	0	0	0	0	0	0	0	0	0	0	0	0	0	0
2	3	3	0	99	0	1	18	0	88.2	88.6	174	88.4	23.9232	72.43	137	90	175	43	104	141	78	1	0	0	0	0	1	0	1	0	0	1	0	1	2	0	1	0	1	1	4	1	0	1	0	0	1	2	0
5	1	0	1	1	8	1	18	0	91	91	171	91	23.0485	67.396	125	72	129	41	64	122	94	1	0	0	0	0	0	0	0	0	0	0	0	1	1	0	1	0	1	1	3	1	0	0	0	0	1	1	0
2	3	3	0	99	0	2	18	0	85.6	86.3	154	85.95	27.0864	64.238	118	80	145	59	72	69	78	1	0	1	0	0	0	0	0	0	0	1	0	0	1	0	1	0	0	0	2	0	0	1	0	0	0	1	0
2	3	2	0	99	0	2	18	0	80.6	81	165	80.8	23.2081	63.184	128	78	204	49	141	71	131	1	1	1	1	0	0	1	2	0	1	0	0	0	1	0	0	1	1	0	2	0	0	0	1	0	0	1	0
2	3	99	0	99	0	2	18	0	83.9	83.8	155	83.85	24.8067	59.598	111	69	166	59	92	73	96	1	0	1	0	0	0	0	0	0	0	0	0	0	0	0	0	0	0	0	0	0	0	0	0	0	0	0	0
2	2	4	0	99	0	1	18	0	79.1	79.2	171	79.15	22.6473	66.223	136	76	138	38	85	74	95	1	0	0	1	0	0	0	1	0	0	0	1	0	1	0	0	0	1	0	1	0	0	1	0	1	0	2	0
1	1	1	0	99	0	1	18	0	114	114	183	114	36.4953	122.219	113	64	164	34	98	161	104	1	1	1	1	1	0	1	3	1	0	0	1	1	3	1	1	0	1	1	3	1	1	0	0	1	1	3	1
5	3	2	0	99	4	2	18	0	83.3	84	162	83.65	24.7009	64.825	118	70	188	57	115	78	81	1	0	1	0	0	0	0	0	0	0	0	0	0	0	0	0	0	0	0	0	0	0	0	0	0	0	0	0
2	1	3	0	99	0	2	18	0	77.8	78	155	77.9	20.6185	49.536	102	69	209	71	119	93	80	1	0	0	0	0	0	0	0	0	0	0	0	0	0	0	0	0	0	0	0	0	0	0	0	0	0	0	0
4	2	2	0	99	0	1	18	0	86.5	86.2	171	86.35	22.4708	65.707	111	72	92	41	43	41	96	1	0	0	0	0	0	0	0	0	0	0	0	0	0	0	0	0	1	0	1	0	0	0	0	0	0	0	0
5	1	3	0	99	0	1	19	0	91.8	91.7	170.3	91.75	26.4929	76.835	123	69	164	33	68	317	68	2	0	0	1	1	0	0	2	0	0	0	1	1	2	0	1	0	1	1	3	1	0	0	0	1	1	2	0
5	3	3	0	99	7	1	19	0	78.8	78.4	170	78.6	20.0938	58.071	118	65	114	34	67	66	95	2	0	0	1	0	0	0	1	0	0	0	1	0	1	0	0	0	1	0	1	0	0	0	0	1	0	1	0
2	3	2	0	99	11	1	18	0	80.8	81.2	164	81	21.6556	58.245	110	71	159	38	102	94	86	1	0	0	1	0	0	0	1	0	0	0	1	0	1	0	0	0	1	0	1	0	0	0	0	1	0	1	0
9	3	3	0	99	4	1	18	0	77.9	77.2	171	77.55	19.5373	57.129	108	65	150	55	67	140	88	1	0	0	0	0	0	0	0	0	0	0	0	1	1	0	0	0	0	1	1	0	0	0	0	0	1	1	0
2	3	4	1	0	0	1	18	0	85.1	85.1	192	85.1	20.8363	76.811	127	68	170	56	92	109	84	1	0	0	0	0	0	0	0	0	0	0	0	0	0	0	0	0	0	1	1	0	0	0	0	0	0	0	0
5	3	0	0	99	0	1	18	0	88.6	88.4	169	88.5	25.9977	74.252	123	71	144	55	71	91	92	1	0	0	0	0	0	0	0	0	0	0	0	0	0	0	1	0	0	0	1	0	0	0	0	0	0	0	0
9	2	1	0	99	10	1	18	0	84.5	84.1	177	84.3	23.8	74.563	117	73	169	49	104	80	103	1	1	0	0	0	0	0	1	0	0	0	0	0	0	0	0	0	0	0	0	0	0	0	0	0	0	0	0
2	2	3	1	1	9	1	19	0	85.3	85.3	155	85.3	27.0019	64.872	109	69	203	46	121	182	81	2	0	0	0	1	0	0	1	0	0	0	0	1	1	0	0	0	0	1	1	0	0	0	0	0	1	1	0
2	3	2	0	99	0	2	18	0	73.1	74	154	73.55	20.0595	47.573	97	62	134	49	74	56	87	1	0	0	1	0	0	0	1	0	0	0	0	0	0	0	0	0	1	0	1	0	0	0	0	0	0	0	0
2	3	4	1	1	0	1	18	0	75.7	75	179	75.35	19.0219	60.948	111	69	160	53	84	113	86	1	0	0	0	0	0	0	0	0	0	0	0	1	1	0	0	0	0	1	1	0	0	0	0	0	1	1	0
2	3	4	1	1	1	1	18	0	78.7	78.2	168	78.45	19.527	55.113	146	104	206	45	141	98	90	1	0	0	0	0	1	0	1	0	0	1	0	0	1	0	0	0	0	0	1	0	0	1	0	0	0	1	0
5	3	2	0	99	0	2	18	0	76.8	75.9	146	76.35	21.3	45.403	104	68	153	45	88	101	109	1	1	0	1	0	0	0	2	0	0	0	0	0	0	0	0	0	1	1	2	0	0	0	0	0	0	0	0
5	3	0	0	99	2	1	18	0	81.3	81	168	81.15	20.5354	57.959	122	75	170	48	95	134	71	1	0	0	0	0	0	0	0	0	0	0	0	1	1	0	0	0	0	1	1	0	0	0	0	0	1	1	0
2	3	1	0	99	8	1	18	0	81.7	81.7	175	81.7	19.9928	61.228	115	71	131	58	62	53	84	1	0	0	0	0	0	0	0	0	0	0	0	0	0	0	0	0	0	0	0	0	0	0	0	0	0	0	0
2	3	3	1	0	5	1	18	0	77.2	76.5	167	76.85	19.4263	54.178	122	73	157	24	105	139	88	1	0	0	1	0	0	0	1	0	0	0	1	1	2	0	0	0	1	1	2	0	0	0	0	1	1	2	0
2	3	5	1	0	8	2	18	0	89.4	89.6	158	89.5	26.3179	65.7	104	72	230	53	148	145	79	1	0	1	0	0	0	0	0	0	0	0	0	1	1	0	1	0	0	1	2	0	0	0	0	0	1	1	0
2	3	2	0	99	0	1	18	0	76.6	77	176	76.8	18.6525	57.778	133	74	137	57	69	56	87	1	0	0	0	0	0	0	0	0	0	0	0	0	0	0	0	0	0	0	0	0	0	1	0	0	0	1	0
2	3	5	0	99	0	2	18	0	82.7	83.1	164	82.9	22.1542	59.586	110	66	230	43	158	145	88	1	0	1	1	0	0	0	1	0	0	0	0	1	1	0	0	0	1	1	2	0	0	0	0	0	1	1	0
5	1	3	0	99	0	2	18	0	66.8	66.6	148	66.7	18.4774	40.473	97	57	164	58	93	63	96	1	0	0	0	0	0	0	0	0	0	0	0	0	0	0	0	0	0	0	0	0	0	0	0	0	0	0	0
2	2	4	0	99	15	1	18	0	73.7	73.8	170	73.75	19.7419	57.054	110	80	109	44	53	62	87	1	0	0	0	0	0	0	0	0	0	0	0	0	0	0	0	0	1	0	1	0	0	1	0	0	0	1	0
2	3	4	0	99	9	1	18	0	77.7	77.7	167	77.7	22.387	62.435	135	77	175	62	98	76	91	1	0	0	0	0	0	0	0	0	0	0	0	0	0	0	0	0	0	0	0	0	0	1	0	0	0	1	0
2	3	99	0	99	0	2	18	0	72.6	73	152	72.8	18.0363	41.671	105	71	120	50	63	63	100	1	1	0	0	0	0	0	1	0	0	0	0	0	0	0	0	0	0	0	0	0	0	0	0	0	0	0	0
2	3	4	1	1	6	1	18	0	81.3	81.5	182	81.4	19.7697	65.485	121	78	108	46	45	86	87	1	0	0	0	0	0	0	0	0	0	0	0	0	0	0	0	0	0	0	0	0	0	0	0	0	0	0	0
9	3	4	0	99	4	1	18	0	78.7	79.2	176	78.95	19.4102	60.125	114	78	124	37	69	88	93	1	0	0	1	0	0	0	1	0	0	0	1	0	1	0	0	0	1	0	1	0	0	0	0	1	0	1	0
5	2	3	0	99	0	2	18	0	79.5	79	180	79.25	20.0917	65.097	117	79	153	50	85	92	96	1	0	0	0	0	0	0	0	0	0	0	0	0	0	0	0	0	0	0	0	0	0	0	0	0	0	0	0
2	3	5	0	99	7	2	19	0	91.7	91.5	154.5	91.6	27.846	66.469	114	69	135	56	68	54	102	2	1	1	0	0	0	0	1	0	0	0	0	0	0	0	1	0	0	0	1	0	0	0	0	0	0	0	0
3	3	4	0	99	0	1	18	0	76.9	77.8	172	77.35	18.5475	54.871	140	88	153	45	88	101	87	1	0	0	0	0	1	0	1	0	0	1	0	0	1	0	0	0	0	1	2	0	0	1	0	0	0	1	0
5	1	2	0	99	11	1	19	0	94.1	94.9	181	94.5	22.9407	75.156	114	70	157	38	104	77	91	2	0	1	1	0	0	0	1	0	0	0	1	0	1	0	1	0	1	0	2	0	0	0	0	1	0	1	0
2	3	3	0	99	5	1	18	0	82	82.1	158	82.05	23.054	57.552	107	74	119	32	64	116	78	1	0	0	1	0	0	0	1	0	0	0	1	1	2	0	0	0	1	1	2	0	0	0	0	1	1	2	0
5	3	3	0	99	0	1	18	0	75.4	75.7	174	75.55	18.8215	56.984	114	69	140	60	68	59	98	1	0	0	0	0	0	0	0	0	0	0	0	0	0	0	0	0	0	0	0	0	0	0	0	0	0	0	0
10	3	3	0	99	0	1	18	0	86.5	86	175	86.25	23.8743	73.115	114	67	108	44	53	54	129	1	1	0	0	0	0	0	1	0	1	0	0	0	1	0	0	1	1	0	2	0	0	0	1	0	0	1	0
2	2	4	0	99	0	1	18	0	80.4	79.5	175	79.95	20.3664	62.372	115	74	152	48	84	98	89	1	0	0	0	0	0	0	0	0	0	0	0	0	0	0	0	0	0	0	0	0	0	0	0	0	0	0	0
2	2	2	1	0	0	1	18	0	82.5	82.6	189	82.55	17.626	62.962	102	56	123	30	81	62	90	1	0	0	1	0	0	0	1	0	0	0	1	0	1	0	0	0	1	0	1	0	0	0	0	1	0	1	0
2	3	5	1	0	2	1	18	0	85.4	85.7	175	85.55	21.8136	66.804	122	65	124	35	75	70	133	1	1	0	1	0	0	0	2	0	1	0	1	0	2	0	0	1	1	0	2	0	0	0	1	1	0	2	0
5	3	3	0	99	8	1	18	0	83.4	83.7	162	83.55	23.6858	62.161	114	64	143	41	85	87	83	1	0	0	0	0	0	0	0	0	0	0	0	0	0	0	0	0	1	0	1	0	0	0	0	0	0	0	0
5	1	1	0	99	10	2	18	0	72.3	72.3	160	72.3	18.5789	47.562	99	69	126	46	64	80	89	1	0	0	1	0	0	0	1	0	0	0	0	0	0	0	0	0	1	0	1	0	0	0	0	0	0	0	0
5	1	0	0	99	9	2	18	0	74.4	73.6	156	74	17.3015	42.105	108	76	111	41	58	60	96	1	0	0	1	0	0	0	1	0	0	0	0	0	0	0	0	0	1	0	1	0	0	0	0	0	0	0	0
5	3	3	0	99	8	2	18	0	87.7	88.3	170	88	24.0097	69.388	119	70	139	36	87	78	104	1	1	1	1	0	0	1	2	0	0	0	1	0	1	0	1	0	1	0	2	0	0	0	0	1	0	1	0
2	2	2	0	99	12	1	18	0	75.8	75.2	184	75.5	17.8382	60.393	106	69	120	49	63	40	82	1	0	0	0	0	0	0	0	0	0	0	0	0	0	0	0	0	0	0	0	0	0	0	0	0	0	0	0
2	3	4	0	99	4	2	18	0	74.6	74.2	157	74.4	21.641	53.343	114	75	139	34	92	67	90	1	0	0	1	0	0	0	1	0	0	0	1	0	1	0	0	0	1	0	1	0	0	0	0	1	0	1	0
2	3	4	0	99	0	1	18	0	82.2	81.9	162	82.05	22.4047	58.799	108	61	207	38	149	101	88	1	0	0	1	0	0	0	1	0	0	0	1	0	1	0	0	0	1	1	2	0	0	0	0	1	0	1	0
2	2	4	0	99	2	2	18	0	85.3	85.6	160	85.45	24.9215	63.799	105	70	171	54	102	76	91	1	0	1	0	0	0	0	0	0	0	0	0	0	0	0	1	0	0	0	1	0	0	0	0	0	0	0	0
2	2	4	0	99	7	1	18	0	75.7	74.9	192	75.3	16.4128	60.504	122	76	177	43	95	195	76	1	0	0	0	1	0	0	1	0	0	0	0	1	1	0	0	0	1	1	2	0	0	0	0	0	1	1	0
2	3	5	0	99	17	1	18	0	76.6	76.4	164	76.5	18.1402	48.79	109	63	199	41	139	94	82	1	0	0	0	0	0	0	0	0	0	0	0	0	0	0	0	0	1	0	1	0	0	0	0	0	0	0	0
1	2	4	0	99	23	1	18	0	77.5	77.5	169	77.5	19.8698	56.75	118	80	132	63	56	63	79	1	0	0	0	0	0	0	0	0	0	0	0	0	0	0	0	0	0	0	0	0	0	1	0	0	0	1	0
1	1	5	0	99	0	1	18	0	82.4	82.9	158	82.65	24.9383	62.256	127	73	130	40	71	95	82	1	0	0	0	0	0	0	0	0	0	0	1	0	1	0	0	0	1	0	1	0	0	0	0	1	0	1	0
2	3	4	0	99	4	2	18	0	86.9	86.9	159	86.9	26.7928	67.735	111	82	185	68	93	121	88	1	0	1	0	0	0	0	0	0	0	0	0	1	1	0	1	0	0	1	2	0	0	1	0	0	1	2	0
2	3	99	0	99	7	1	18	0	76.9	76.2	168	76.55	19.808	55.906	121	71	149	62	71	79	92	1	0	0	0	0	0	0	0	0	0	0	0	0	0	0	0	0	0	0	0	0	0	0	0	0	0	0	0
2	1	3	0	99	0	1	18	0	86.1	87	179	86.55	24.8104	79.495	135	74	165	62	93	49	88	1	0	0	0	0	0	0	0	0	0	0	0	0	0	0	0	0	0	0	0	0	0	1	0	0	0	1	0
2	3	5	0	99	0	1	18	0	79.4	79.6	170	79.5	21.674	62.638	118	74	130	42	71	86	85	1	0	0	0	0	0	0	0	0	0	0	0	0	0	0	0	0	1	0	1	0	0	0	0	0	0	0	0
2	3	4	0	99	4	1	18	0	75.4	74.7	176	75.05	18.5082	57.331	122	72	165	70	80	74	92	1	0	0	0	0	0	0	0	0	0	0	0	0	0	0	0	0	0	0	0	0	0	0	0	0	0	0	0
2	3	4	0	99	0	2	18	0	66.2	65.8	162	66	16.3721	42.967	129	81	172	60	100	58	88	1	0	0	0	0	0	0	0	0	0	1	0	0	1	0	0	0	0	0	1	0	0	1	0	0	0	1	0
9	1	2	0	99	5	1	18	0	82.3	82.4	176	82.35	18.5495	57.459	108	66	139	53	72	69	90	1	0	0	0	0	0	0	0	0	0	0	0	0	0	0	0	0	0	0	0	0	0	0	0	0	0	0	0
4	3	5	0	99	0	2	18	0	95.4	95.3	151	95.35	30.946	70.56	120	71	115	43	62	48	77	1	0	1	1	0	0	0	1	1	0	0	0	0	1	0	1	0	1	0	2	0	1	0	0	0	0	1	0
1	1	3	1	0	20	1	18	0	90.8	90.1	173	90.45	21.8307	65.337	114	67	136	39	78	97	74	1	0	0	1	0	0	0	1	0	0	0	1	0	1	0	1	0	1	0	2	0	0	0	0	1	0	1	0
2	3	5	0	99	0	2	18	0	76.5	76.5	168	76.5	21.4077	60.421	113	72	129	54	66	44	87	1	0	0	0	0	0	0	0	0	0	0	0	0	0	0	0	0	0	0	0	0	0	0	0	0	0	0	0
4	1	5	0	99	0	2	18	0	68.4	69.1	156	68.75	18.0354	43.891	96	60	138	35	87	81	91	1	0	0	1	0	0	0	1	0	0	0	1	0	1	0	0	0	1	0	1	0	0	0	0	1	0	1	0
10	3	5	0	99	7	1	18	0	80.5	80.5	174	80.5	25.6761	77.737	140	85	113	47	57	43	83	1	0	0	0	0	1	0	1	0	0	1	0	0	1	0	0	0	0	0	1	0	0	1	0	0	0	1	0
4	3	5	0	99	0	1	18	0	76.1	76.4	163	76.25	20.2285	53.745	111	68	116	39	68	43	74	1	0	0	1	0	0	0	1	0	0	0	1	0	1	0	0	0	1	0	1	0	0	0	0	1	0	1	0
10	3	4	1	1	11	1	18	0	84	83.7	162	83.85	22.5972	59.304	106	59	160	41	96	117	84	1	0	0	0	0	0	0	0	0	0	0	0	1	1	0	0	0	1	1	2	0	0	0	0	0	1	1	0
5	2	3	0	99	0	1	18	0	79.2	79.7	182	79.45	18.8033	62.284	113	73	118	43	56	94	89	1	0	0	0	0	0	0	0	0	0	0	0	0	0	0	0	0	1	0	1	0	0	0	0	0	0	0	0
2	1	3	0	99	0	2	19	0	73	72.9	154.5	72.95	19.9847	47.704	97	67	170	51	105	72	98	2	0	0	0	0	0	0	0	0	0	0	0	0	0	0	0	0	0	0	0	0	0	0	0	0	0	0	0
2	2	99	1	1	11	2	18	0	71.4	70.8	159	71.1	17.7525	44.88	105	72	167	42	106	94	79	1	0	0	1	0	0	0	1	0	0	0	0	0	0	0	0	0	1	0	1	0	0	0	0	0	0	0	0
2	3	99	0	99	0	1	18	0	86.4	86.8	173	86.6	23.0379	68.95	112	69	166	31	101	170	90	1	0	0	1	1	0	0	2	0	0	0	1	1	2	0	0	0	1	1	2	0	0	0	0	1	1	2	0
5	3	3	0	99	17	1	18	0	79	79	164	79	24.5431	66.011	133	66	162	71	79	59	91	1	0	0	0	0	0	0	0	0	0	0	0	0	0	0	0	0	0	0	0	0	0	1	0	0	0	1	0
2	2	3	0	99	13	2	18	0	77.2	77	153	77.1	23.3175	54.584	112	74	171	43	108	102	91	1	0	0	1	0	0	0	1	0	0	0	0	0	0	0	0	0	1	1	2	0	0	0	0	0	0	0	0
2	3	1	0	99	1	1	18	0	73.8	74.7	183	74.25	19.533	65.414	117	69	192	66	118	42	96	1	0	0	0	0	0	0	0	0	0	0	0	0	0	0	0	0	0	0	0	0	0	0	0	0	0	0	0
2	2	4	0	99	4	2	19	0	61.5	60.6	142.5	61.05	16.8195	34.154	99	67	148	59	75	68	69	2	0	0	0	0	0	0	0	0	0	0	0	0	0	0	0	0	0	0	0	0	0	0	0	0	0	0	0
2	1	3	0	99	0	1	18	0	83.3	82.5	175	82.9	20.6184	63.144	123	64	113	44	61	41	82	1	0	0	0	0	0	0	0	0	0	0	0	0	0	0	0	0	1	0	1	0	0	0	0	0	0	0	0
2	3	4	0	99	0	2	18	0	70.5	70.5	171	70.5	19.1409	55.97	106	69	149	49	82	89	95	1	0	0	1	0	0	0	1	0	0	0	0	0	0	0	0	0	1	0	1	0	0	0	0	0	0	0	0
2	3	5	1	0	0	2	18	0	80.8	81	161	80.9	25.3586	65.732	106	69	142	29	94	93	86	1	0	1	1	0	0	0	1	0	0	0	1	0	1	0	0	0	1	0	1	0	0	0	0	1	0	1	0
2	3	5	0	99	0	2	18	0	90	90	151	90	31.3214	71.416	115	78	181	44	118	93	88	1	0	1	1	0	0	0	1	0	0	0	0	0	0	0	1	0	1	0	2	0	0	0	0	0	0	0	0
5	3	2	0	99	0	1	18	0	79.7	79.7	174	79.7	23.8545	72.222	129	64	159	44	96	93	107	1	1	0	0	0	0	0	1	0	0	0	0	0	0	0	0	0	1	0	1	0	0	0	0	0	0	0	0
9	3	4	0	99	0	1	18	0	80.4	80.2	170	80.3	20.9412	60.52	119	72	138	43	70	126	93	1	0	0	0	0	0	0	0	0	0	0	0	1	1	0	0	0	1	1	2	0	0	0	0	0	1	1	0
2	3	4	0	99	0	2	18	0	76	76	162	76	20.7148	54.364	107	66	163	61	90	62	94	1	0	0	0	0	0	0	0	0	0	0	0	0	0	0	0	0	0	0	0	0	0	0	0	0	0	0	0
2	3	5	0	99	0	1	18	0	87.8	87.4	173	87.6	24.1515	72.283	125	67	112	44	58	50	87	1	0	0	0	0	0	0	0	0	0	0	0	0	0	0	0	0	1	0	1	0	0	0	0	0	0	0	0
2	3	3	0	99	14	1	18	0	95.4	95.8	174	95.6	24.8266	75.165	120	76	121	42	67	60	92	1	0	1	0	0	0	0	0	1	0	0	0	0	1	0	1	0	1	0	2	0	1	0	0	0	0	1	0
2	2	99	0	99	0	2	18	0	69	70	161	69.5	18.1841	47.135	98	65	96	40	46	51	70	1	0	0	1	0	0	0	1	0	0	0	1	0	1	0	0	0	1	0	1	0	0	0	0	1	0	1	0
5	3	2	0	99	2	2	18	0	70.8	71.8	160	71.3	18.1273	46.406	106	67	114	62	42	50	99	1	0	0	0	0	0	0	0	0	0	0	0	0	0	0	0	0	0	0	0	0	0	0	0	0	0	0	0
10	99	3	1	0	0	1	18	0	81.1	81.6	164	81.35	24.1512	64.957	142	80	157	46	86	123	94	1	0	0	0	0	0	0	0	0	0	1	0	1	2	0	0	0	0	1	2	0	0	1	0	0	1	2	0
2	3	4	99	99	0	1	18	0	77.3	77.3	170	77.3	19.3955	56.053	107	63	126	26	85	73	91	1	0	0	1	0	0	0	1	0	0	0	1	0	1	0	0	0	1	0	1	0	0	0	0	1	0	1	0
2	3	5	0	99	4	1	18	0	74.2	74.7	176	74.45	18.5915	57.589	126	67	123	41	71	57	90	1	0	0	0	0	0	0	0	0	0	0	0	0	0	0	0	0	1	0	1	0	0	0	0	0	0	0	0
2	3	3	0	99	0	1	18	0	81.2	82.2	174	81.7	19.1918	58.105	123	85	113	41	62	51	108	1	1	0	0	0	0	0	1	0	0	0	0	0	0	0	0	0	1	0	1	0	0	1	0	0	0	1	0
2	3	99	0	99	0	2	18	0	81.1	81.8	166	81.45	23.5016	64.761	127	75	167	45	97	126	87	1	0	1	1	0	0	0	1	0	0	0	0	1	1	0	0	0	1	1	2	0	0	0	0	0	1	1	0
2	3	5	0	99	0	1	18	0	85.4	85.7	175	85.55	23.0727	70.66	119	67	175	40	120	76	90	1	0	0	0	0	0	0	0	0	0	0	1	0	1	0	0	0	1	0	1	0	0	0	0	1	0	1	0
2	2	5	0	99	4	2	18	0	73.3	73.2	157	73.25	18.3529	45.238	96	64	200	85	96	96	81	1	0	0	0	0	0	0	0	0	0	0	0	0	0	0	0	0	0	0	0	0	0	0	0	0	0	0	0
5	3	3	0	99	1	1	18	0	102.5	102.1	181	102.3	28.6441	93.841	144	75	145	59	63	113	102	1	1	1	0	0	0	0	1	1	0	0	0	1	2	0	1	0	0	1	2	0	1	1	0	0	1	3	1
2	3	4	0	99	5	1	18	0	85.3	85.6	181	85.45	22.3513	73.225	129	80	151	52	74	124	94	1	0	0	0	0	0	0	0	0	0	0	0	1	1	0	0	0	0	1	1	0	0	1	0	0	1	2	0
2	3	4	0	99	12	1	18	0	80.1	79.5	173	79.8	22.2326	66.54	122	63	159	60	83	81	96	1	0	0	0	0	0	0	0	0	0	0	0	0	0	0	0	0	0	0	0	0	0	0	0	0	0	0	0
5	3	4	0	99	0	1	18	0	79.9	80.5	195	80.2	17.5895	66.884	123	70	130	48	70	58	147	1	1	0	0	0	0	0	1	0	1	0	0	0	1	0	0	1	0	0	1	0	0	0	1	0	0	1	0
5	3	2	1	0	13	1	18	0	75.8	75.6	178	75.7	19.4003	61.468	113	77	185	42	129	69	86	1	0	0	0	0	0	0	0	0	0	0	0	0	0	0	0	0	1	0	1	0	0	0	0	0	0	0	0
5	3	2	0	99	0	2	18	0	76.2	76.5	157	76.35	18.3679	45.275	102	65	163	64	87	58	88	1	0	0	0	0	0	0	0	0	0	0	0	0	0	0	0	0	0	0	0	0	0	0	0	0	0	0	0
2	3	99	0	99	0	1	18	0	70	70	176	70	18.401	56.999	106	63	144	53	68	114	84	1	0	0	0	0	0	0	0	0	0	0	0	1	1	0	0	0	0	1	1	0	0	0	0	0	1	1	0
2	1	2	0	99	0	1	18	0	84.6	83.7	177	84.15	22.2905	69.834	115	74	142	47	66	145	137	1	1	0	0	0	0	0	1	0	1	0	0	1	2	0	0	1	0	1	2	0	0	0	1	0	1	2	0
4	3	99	0	99	9	1	18	0	79.4	79.6	166	79.5	23.1191	63.707	132	70	166	41	99	130	98	1	0	0	0	0	0	0	0	0	0	0	0	1	1	0	0	0	1	1	2	0	0	1	0	0	1	2	0
5	3	99	0	99	6	1	18	0	77.8	77.8	174	77.8	19.5739	59.262	113	71	104	33	47	120	90	1	0	0	1	0	0	0	1	0	0	0	1	1	2	0	0	0	1	1	2	0	0	0	0	1	1	2	0
2	3	4	1	0	0	2	18	0	81.7	82.5	153	82.1	24.3505	57.002	113	65	157	32	103	112	83	1	0	1	1	0	0	0	1	0	0	0	1	1	2	0	0	0	1	1	2	0	0	0	0	1	1	2	0
2	3	99	0	99	0	2	18	0	79.6	79.2	153	79.4	24.2637	56.799	115	72	179	31	100	239	94	1	0	0	1	1	0	0	2	0	0	0	1	1	2	0	0	0	1	1	2	0	0	0	0	1	1	2	0
2	1	3	0	99	0	1	18	0	77.6	78.1	168	77.85	19.9203	56.223	113	60	130	51	70	46	96	1	0	0	0	0	0	0	0	0	0	0	0	0	0	0	0	0	0	0	0	0	0	0	0	0	0	0	0
3	2	99	0	99	4	1	18	0	82.9	83	181	82.95	24.096	78.941	126	67	104	40	54	51	103	1	1	0	0	0	0	0	1	0	0	0	1	0	1	0	0	0	1	0	1	0	0	0	0	1	0	1	0
2	3	4	0	99	0	1	18	0	93.1	93.7	179	93.4	24.7455	79.287	128	80	184	30	122	161	85	1	0	0	1	1	0	0	2	0	0	0	1	1	2	0	1	0	1	1	3	1	0	1	0	1	1	3	1
2	3	1	1	1	7	1	18	0	78.2	78.6	177	78.4	20.8376	65.282	135	74	109	50	49	50	90	1	0	0	0	0	0	0	0	0	0	0	0	0	0	0	0	0	0	0	0	0	0	1	0	0	0	1	0
2	2	3	0	99	0	1	18	0	79.8	80	173	79.9	21.8039	65.257	118	66	168	50	97	104	101	1	1	0	0	0	0	0	1	0	0	0	0	0	0	0	0	0	0	1	1	0	0	0	0	0	0	0	0
2	3	5	0	99	0	1	18	0	84.8	85.1	169	84.95	21.9726	62.756	129	78	127	29	87	54	105	1	1	0	1	0	0	0	2	0	0	0	1	0	1	0	0	0	1	0	1	0	0	0	0	1	0	1	0
2	2	99	0	99	0	2	18	0	74.2	74.9	157	74.55	18.2072	44.879	121	80	210	86	103	105	124	1	1	0	0	0	0	0	1	0	1	1	0	0	2	0	0	1	0	1	3	1	0	1	1	0	0	2	0
2	1	5	0	99	0	1	18	0	76.9	76.7	167	76.8	20.3561	56.771	112	67	223	54	153	79	135	1	1	0	0	0	0	0	1	0	1	0	0	0	1	0	0	1	0	0	1	0	0	0	1	0	0	1	0
2	3	99	0	99	0	2	18	0	74	73.6	151	73.8	18.8939	43.08	106	71	159	57	85	83	122	1	1	0	0	0	0	0	1	0	1	0	0	0	1	0	0	1	0	0	1	0	0	0	1	0	0	1	0
2	3	4	0	99	0	1	18	0	77	77.3	178	77.15	21.1387	66.976	107	65	144	46	81	84	100	1	1	0	0	0	0	0	1	0	0	0	0	0	0	0	0	0	0	0	0	0	0	0	0	0	0	0	0
9	1	2	0	99	9	1	18	0	91.9	92.4	177	92.15	22.4201	70.24	137	88	162	41	97	121	120	1	1	0	0	0	1	0	2	0	1	1	0	1	3	1	1	1	1	1	5	1	0	1	1	0	1	3	1
5	3	5	0	99	2	2	18	0	72.6	72.4	152	72.5	21.9572	50.73	114	77	174	64	95	76	84	1	0	0	0	0	0	0	0	0	0	0	0	0	0	0	0	0	0	0	0	0	0	0	0	0	0	0	0
2	2	3	0	99	0	2	18	0	63.2	62.9	157	63.05	16.9695	41.828	131	75	134	70	51	63	91	1	0	0	0	0	0	0	0	0	0	0	0	0	0	0	0	0	0	0	0	0	0	1	0	0	0	1	0
9	1	4	0	99	0	1	18	0	89.8	89.2	193	89.5	21.9845	81.89	122	75	128	31	84	67	89	1	0	0	1	0	0	0	1	0	0	0	1	0	1	0	1	0	1	0	2	0	0	0	0	1	0	1	0
2	2	3	0	99	9	2	18	0	90.1	91	165	90.55	24.2843	66.114	112	67	103	41	51	55	90	1	0	1	1	0	0	0	1	0	0	0	0	0	0	0	1	0	1	0	2	0	0	0	0	0	0	0	0
2	3	3	1	0	9	1	18	0	76.2	76.2	183	76.2	19.7438	66.12	139	83	138	36	85	87	99	1	0	0	1	0	0	0	1	0	0	1	1	0	2	0	0	0	1	0	2	0	0	1	0	1	0	2	0
2	3	2	0	99	0	1	18	0	84.4	83.8	180	84.1	22.7049	73.564	122	78	146	50	73	113	91	1	0	0	0	0	0	0	0	0	0	0	0	1	1	0	0	0	0	1	1	0	0	0	0	0	1	1	0
9	4	2	0	99	0	2	18	0	72	71.4	170	71.7	17.6035	50.874	105	63	117	56	49	59	91	1	0	0	0	0	0	0	0	0	0	0	0	0	0	0	0	0	0	0	0	0	0	0	0	0	0	0	0
2	1	1	0	99	1	2	18	0	76	75.8	173	75.9	19.9843	59.811	125	84	205	44	98	316	85	1	0	0	1	1	0	0	2	0	0	1	0	1	2	0	0	0	1	1	3	1	0	1	0	0	1	2	0
5	1	2	0	99	0	1	18	0	82.2	81.6	171	81.9	21.3433	62.41	124	75	143	56	76	55	85	1	0	0	0	0	0	0	0	0	0	0	0	0	0	0	0	0	0	0	0	0	0	0	0	0	0	0	0
5	3	3	0	99	0	2	18	0	81.3	81.1	179	81.2	20.8539	66.818	121	76	172	52	105	75	83	1	0	1	0	0	0	0	0	0	0	0	0	0	0	0	0	0	0	0	0	0	0	0	0	0	0	0	0
2	2	4	0	99	0	2	18	0	94.7	94.3	159	94.5	26.1157	66.023	114	78	156	49	98	44	83	1	0	1	1	0	0	0	1	1	0	0	0	0	1	0	1	0	1	0	2	0	1	0	0	0	0	1	0
2	3	4	0	99	0	2	18	0	92.2	92.1	158	92.15	29.0975	72.639	113	73	123	42	59	108	86	1	0	1	1	0	0	0	1	1	0	0	0	0	1	0	1	0	1	1	3	1	1	0	0	0	0	1	0
2	3	99	0	99	0	2	18	0	71.5	70.8	159	71.15	20.2591	51.217	115	76	163	49	103	53	81	1	0	0	1	0	0	0	1	0	0	0	0	0	0	0	0	0	1	0	1	0	0	0	0	0	0	0	0
10	3	99	1	0	0	1	18	0	77.8	77.5	170	77.65	20.5249	59.317	121	75	192	50	129	64	88	1	0	0	0	0	0	0	0	0	0	0	0	0	0	0	0	0	0	0	0	0	0	0	0	0	0	0	0
1	1	4	0	99	4	1	18	0	77.5	77.6	161	77.55	22.5728	58.511	133	74	189	66	101	108	109	1	1	0	0	0	0	0	1	0	0	0	0	0	0	0	0	0	0	1	1	0	0	1	0	0	0	1	0
2	3	3	0	99	0	1	18	0	79.1	78.8	178	78.95	19.7756	62.657	124	74	111	26	57	141	94	1	0	0	1	0	0	0	1	0	0	0	1	1	2	0	0	0	1	1	2	0	0	0	0	1	1	2	0
2	3	99	0	99	2	1	18	0	75	75	160	75	18.5617	47.518	105	71	153	47	81	127	92	1	0	0	0	0	0	0	0	0	0	0	0	1	1	0	0	0	0	1	1	0	0	0	0	0	1	1	0
2	3	5	0	99	11	2	18	0	82.9	82.6	168	82.75	21.8335	61.623	105	70	210	39	148	115	85	1	0	1	1	0	0	0	1	0	0	0	1	1	2	0	0	0	1	1	2	0	0	0	0	1	1	2	0
2	3	4	0	99	18	1	18	0	81.2	81.6	169	81.4	20.7111	59.153	121	78	141	37	56	241	83	1	0	0	1	1	0	0	2	0	0	0	1	1	2	0	0	0	1	1	2	0	0	0	0	1	1	2	0
2	3	4	0	99	0	1	18	0	88.1	88.3	170	88.2	25.6747	74.2	130	81	144	41	74	145	95	1	0	0	0	0	0	0	0	0	0	0	0	1	1	0	1	0	1	1	3	1	0	1	0	0	1	2	0
2	3	99	0	99	0	1	18	0	82.4	81.4	188	81.9	19.2655	68.092	102	62	124	54	54	81	85	1	0	0	0	0	0	0	0	0	0	0	0	0	0	0	0	0	0	0	0	0	0	0	0	0	0	0	0
2	3	99	0	99	5	2	18	0	68.7	68.8	151	68.75	18.0953	41.259	95	69	96	47	38	55	132	1	1	0	1	0	0	0	2	0	1	0	0	0	1	0	0	1	1	0	2	0	0	0	1	0	0	1	0
2	2	4	0	99	9	1	18	0	75.5	75.6	173	75.55	19.3328	57.861	124	76	157	62	79	81	74	1	0	0	0	0	0	0	0	0	0	0	0	0	0	0	0	0	0	0	0	0	0	0	0	0	0	0	0
10	2	3	0	99	23	1	18	0	72.6	72.8	168.5	72.7	17.9035	50.832	131	82	125	42	62	103	135	1	1	0	0	0	0	0	1	0	1	0	0	0	1	0	0	1	1	1	3	1	0	1	1	0	0	2	0
2	3	3	0	99	0	1	18	0	86.8	86.9	173	86.85	21.8915	65.519	127	79	177	26	129	108	100	1	1	0	1	0	0	0	2	0	0	0	1	0	1	0	0	0	1	1	2	0	0	0	0	1	0	1	0
5	3	5	0	99	7	2	18	0	76.5	76.6	162	76.55	19.856	52.11	100	70	131	43	67	106	92	1	0	0	1	0	0	0	1	0	0	0	0	0	0	0	0	0	1	1	2	0	0	0	0	0	0	0	0
2	3	4	0	99	4	1	18	0	72	71.8	169	71.9	18.5354	52.939	131	78	191	40	119	158	94	1	0	0	0	1	0	0	1	0	0	0	1	1	2	0	0	0	1	1	2	0	0	1	0	1	1	3	1
5	2	4	0	99	0	1	18	0	71.8	71.7	165	71.75	19.485	53.048	123	70	120	38	70	62	89	1	0	0	1	0	0	0	1	0	0	0	1	0	1	0	0	0	1	0	1	0	0	0	0	1	0	1	0
2	1	3	0	99	0	1	18	0	76.6	76	175	76.3	17.8305	54.606	111	73	127	41	68	89	103	1	1	0	0	0	0	0	1	0	0	0	0	0	0	0	0	0	1	0	1	0	0	0	0	0	0	0	0
2	3	5	0	99	0	2	18	0	70.1	70.6	166	70.35	17.7939	49.033	104	61	137	41	83	67	91	1	0	0	1	0	0	0	1	0	0	0	0	0	0	0	0	0	1	0	1	0	0	0	0	0	0	0	0
2	2	4	0	99	0	1	18	0	82.3	83.1	175	82.7	21.2963	65.22	142	77	148	46	84	91	82	1	0	0	0	0	0	0	0	0	0	0	0	0	0	0	0	0	0	0	0	0	0	1	0	0	0	1	0
2	3	3	1	1	9	1	18	0	96.1	95.5	180	95.8	27.2852	88.404	122	71	151	38	88	126	95	1	0	1	1	0	0	0	1	1	0	0	1	1	3	1	1	0	1	1	3	1	1	0	0	1	1	3	1
2	3	99	0	99	15	2	18	0	82.7	83.2	158	82.95	24.5886	61.383	111	66	144	70	64	50	85	1	0	1	0	0	0	0	0	0	0	0	0	0	0	0	0	0	0	0	0	0	0	0	0	0	0	0	0
4	2	99	1	1	9	1	18	0	105.6	105.6	177	105.6	33.1772	103.941	122	80	136	31	74	157	84	1	0	1	1	1	0	1	2	1	0	0	1	1	3	1	1	0	1	1	3	1	1	1	0	1	1	4	1
2	3	2	0	99	2	1	18	0	87.1	87.8	188	87.45	21.7256	76.787	132	82	128	43	64	104	96	1	0	0	0	0	0	0	0	0	0	0	0	0	0	0	0	0	1	1	2	0	0	1	0	0	0	1	0
2	3	1	0	99	0	1	18	0	78	78.6	166	78.3	18.8718	52.003	114	63	140	35	88	85	101	1	1	0	1	0	0	0	2	0	0	0	1	0	1	0	0	0	1	0	1	0	0	0	0	1	0	1	0
9	3	3	0	99	0	1	18	0	104.8	104.1	170	104.45	31.4851	90.992	133	81	170	36	119	77	84	1	0	1	1	0	0	0	1	1	0	1	1	0	3	1	1	0	1	0	3	1	1	1	0	1	0	3	1
2	3	1	0	99	7	1	18	0	82.4	81.4	170	81.9	19.5536	56.51	115	77	158	66	81	57	89	1	0	0	0	0	0	0	0	0	0	0	0	0	0	0	0	0	0	0	0	0	0	0	0	0	0	0	0
2	2	1	0	99	0	2	18	0	73.8	73.2	161	73.5	18.5209	48.008	95	66	133	35	81	83	104	1	1	0	1	0	0	0	2	0	0	0	1	0	1	0	0	0	1	0	1	0	0	0	0	1	0	1	0
4	2	4	0	99	0	2	18	0	82	83	151	82.5	24.7809	56.503	110	77	181	34	121	131	81	1	0	1	1	0	0	0	1	0	0	0	1	1	2	0	0	0	1	1	2	0	0	0	0	1	1	2	0
2	1	2	0	99	0	2	18	0	84	84.7	160	84.35	21.0047	53.772	108	73	203	56	127	100	96	1	0	1	0	0	0	0	0	0	0	0	0	0	0	0	0	0	0	1	1	0	0	0	0	0	0	0	0
2	3	2	0	99	0	1	18	0	78.2	78.4	173	78.3	18.8152	56.312	156	97	158	46	86	129	95	1	0	0	0	0	1	0	1	0	0	1	0	1	2	0	0	0	0	1	2	0	0	1	0	0	1	2	0
2	3	5	0	99	0	2	18	0	64.2	63.7	147	63.95	17.0299	36.8	106	69	126	46	64	79	86	1	0	0	1	0	0	0	1	0	0	0	0	0	0	0	0	0	1	0	1	0	0	0	0	0	0	0	0
2	3	3	0	99	0	2	18	0	73.7	73.6	153	73.65	20.9167	48.964	102	67	133	49	74	52	86	1	0	0	1	0	0	0	1	0	0	0	0	0	0	0	0	0	1	0	1	0	0	0	0	0	0	0	0
9	3	5	0	99	0	2	18	0	78.1	78	155	78.05	21.2158	50.971	116	73	138	50	77	53	92	1	0	0	0	0	0	0	0	0	0	0	0	0	0	0	0	0	0	0	0	0	0	0	0	0	0	0	0
2	3	5	0	99	7	1	18	0	84.1	84.2	178	84.15	24.8779	78.823	140	74	161	39	102	102	90	1	0	0	1	0	0	0	1	0	0	0	1	0	1	0	0	0	1	1	2	0	0	1	0	1	0	2	0
5	2	3	0	99	0	2	18	0	75.6	75.1	161	75.35	18.8438	48.845	100	66	182	44	118	99	94	1	0	0	1	0	0	0	1	0	0	0	0	0	0	0	0	0	1	0	1	0	0	0	0	0	0	0	0
5	2	4	0	99	2	1	18	0	83.3	84.3	156	83.8	21.5471	52.437	111	73	183	66	104	63	93	1	0	0	0	0	0	0	0	0	0	0	0	0	0	0	0	0	0	0	0	0	0	0	0	0	0	0	0
2	3	5	1	1	13	1	18	0	77.9	77.8	172	77.85	19.8655	58.77	135	74	161	42	73	232	82	1	0	0	0	1	0	0	1	0	0	0	0	1	1	0	0	0	1	1	2	0	0	1	0	0	1	2	0
5	3	4	0	99	3	1	18	0	91.1	91.5	185	91.3	21.6871	74.224	125	81	174	39	104	157	95	1	0	0	1	1	0	0	2	0	0	0	1	1	2	0	1	0	1	1	3	1	0	1	0	1	1	3	1
2	3	5	0	99	0	2	18	0	72.4	72.2	160	72.3	16.8812	43.216	96	70	131	42	68	103	89	1	0	0	1	0	0	0	1	0	0	0	0	0	0	0	0	0	1	1	2	0	0	0	0	0	0	0	0
2	3	3	0	99	0	2	18	0	72.3	71.9	165	72.1	19.1835	52.227	113	83	204	79	110	76	81	1	0	0	0	0	0	0	0	0	0	0	0	0	0	0	0	0	0	0	0	0	0	1	0	0	0	1	0
4	3	3	1	0	11	2	18	0	83.1	83.9	158	83.5	25.2484	63.03	102	63	121	40	69	60	88	1	0	1	1	0	0	0	1	0	0	0	1	0	1	0	0	0	1	0	1	0	0	0	0	1	0	1	0
2	3	4	0	99	0	2	18	0	72	72.9	158	72.45	20.2672	50.595	113	72	148	62	76	52	83	1	0	0	0	0	0	0	0	0	0	0	0	0	0	0	0	0	0	0	0	0	0	0	0	0	0	0	0
5	3	1	0	99	0	1	18	0	78.4	77.6	187	78	16.7637	58.621	108	72	180	26	119	173	103	1	1	0	1	1	0	0	3	0	0	0	1	1	2	0	0	0	1	1	2	0	0	0	0	1	1	2	0
2	2	3	0	99	0	2	18	0	71.4	71	161	71.2	19.3083	50.049	101	72	187	71	98	89	85	1	0	0	0	0	0	0	0	0	0	0	0	0	0	0	0	0	0	0	0	0	0	0	0	0	0	0	0
5	3	2	0	99	0	1	18	0	72.5	73.2	171	72.85	17.1297	50.089	112	74	159	37	108	69	96	1	0	0	1	0	0	0	1	0	0	0	1	0	1	0	0	0	1	0	1	0	0	0	0	1	0	1	0
2	3	5	0	99	0	2	18	0	79.1	79	156	79.05	24.4165	59.42	112	74	210	47	147	81	85	1	0	0	1	0	0	0	1	0	0	0	0	0	0	0	0	0	1	0	1	0	0	0	0	0	0	0	0
2	3	5	0	99	4	1	18	0	74.1	73.7	164	73.9	18.6656	50.203	101	74	86	25	51	52	81	1	0	0	1	0	0	0	1	0	0	0	1	0	1	0	0	0	1	0	1	0	0	0	0	1	0	1	0
5	1	2	0	99	0	2	18	0	73.6	73.1	163	73.35	19.1513	50.883	107	77	155	64	75	81	80	1	0	0	0	0	0	0	0	0	0	0	0	0	0	0	0	0	0	0	0	0	0	0	0	0	0	0	0
2	3	3	0	99	0	1	18	0	87.8	87.5	165	87.65	24.267	66.067	115	73	179	28	127	118	87	1	0	0	1	0	0	0	1	0	0	0	1	1	2	0	0	0	1	1	2	0	0	0	0	1	1	2	0
9	2	5	0	99	11	1	18	0	79.5	79.6	182	79.55	20.077	66.503	116	68	169	50	101	91	96	1	0	0	0	0	0	0	0	0	0	0	0	0	0	0	0	0	0	0	0	0	0	0	0	0	0	0	0
2	3	4	0	99	0	2	18	0	62.6	63	152	62.8	17.0685	39.435	96	66	154	63	78	64	88	1	0	0	0	0	0	0	0	0	0	0	0	0	0	0	0	0	0	0	0	0	0	0	0	0	0	0	0
1	3	5	0	99	4	2	18	0	87.1	87.3	153	87.2	25.497	59.686	113	67	153	45	82	130	94	1	0	1	1	0	0	0	1	0	0	0	0	1	1	0	1	0	1	1	3	1	0	0	0	0	1	1	0
2	3	5	0	99	0	1	18	0	86.6	86.5	172	86.55	22.7667	67.353	125	75	149	37	88	122	78	1	0	0	1	0	0	0	1	0	0	0	1	1	2	0	0	0	1	1	2	0	0	0	0	1	1	2	0
2	3	2	0	99	12	1	18	0	107.5	106.9	175	107.2	35.7525	109.492	123	82	173	29	102	208	93	1	0	1	1	1	0	1	2	1	0	0	1	1	3	1	1	0	1	1	3	1	1	1	0	1	1	4	1
5	3	0	0	99	0	1	18	0	76	75.2	166	75.6	18.5571	51.136	129	86	190	75	102	66	95	1	0	0	0	0	0	0	0	0	0	0	0	0	0	0	0	0	0	0	0	0	0	1	0	0	0	1	0
2	3	5	0	99	4	2	18	0	92.4	92.3	166	92.35	23.0835	63.609	122	72	151	52	85	68	90	1	0	1	0	0	0	0	0	1	0	0	0	0	1	0	1	0	0	0	1	0	1	0	0	0	0	1	0
2	2	2	0	99	0	1	18	0	81.3	80.8	183	81.05	19.7492	66.138	119	73	144	30	87	135	79	1	0	0	1	0	0	0	1	0	0	0	1	1	2	0	0	0	1	1	2	0	0	0	0	1	1	2	0
2	3	4	0	99	7	1	18	0	82.9	82	166	82.45	23.7012	65.311	141	82	153	58	78	86	93	1	0	0	0	0	0	0	0	0	0	1	0	0	1	0	0	0	0	0	1	0	0	1	0	0	0	1	0
2	3	5	0	99	0	1	18	0	81.3	80.5	160	80.9	22.9781	58.824	114	71	133	37	84	58	80	1	0	0	1	0	0	0	1	0	0	0	1	0	1	0	0	0	1	0	1	0	0	0	0	1	0	1	0
2	3	4	0	99	14	1	18	0	72.7	73.6	155	73.15	18.3521	44.091	91	65	161	56	90	74	96	1	0	0	0	0	0	0	0	0	0	0	0	0	0	0	0	0	0	0	0	0	0	0	0	0	0	0	0
5	3	5	1	0	20	1	18	0	79	79.6	182	79.3	20.7659	68.785	114	75	129	54	64	57	100	1	1	0	0	0	0	0	1	0	0	0	0	0	0	0	0	0	0	0	0	0	0	0	0	0	0	0	0
2	2	0	0	99	0	1	18	0	89.5	89.9	173	89.7	26.2434	78.544	143	85	205	44	142	95	88	1	0	0	0	0	1	0	1	0	0	1	0	0	1	0	1	0	1	0	3	1	0	1	0	0	0	1	0
2	3	4	0	99	2	2	18	0	69.6	70.2	155	69.9	16.6189	39.927	100	69	125	32	75	88	88	1	0	0	1	0	0	0	1	0	0	0	1	0	1	0	0	0	1	0	1	0	0	0	0	1	0	1	0
4	3	3	0	99	0	1	18	0	85.2	85.5	177	85.35	21.4332	67.148	113	71	182	66	102	68	75	1	0	0	0	0	0	0	0	0	0	0	0	0	0	0	0	0	0	0	0	0	0	0	0	0	0	0	0
9	1	4	0	99	0	2	18	0	83.2	83.8	165	83.5	24.9197	67.844	103	68	117	50	59	38	87	1	0	1	0	0	0	0	0	0	0	0	0	0	0	0	0	0	0	0	0	0	0	0	0	0	0	0	0
2	3	4	0	99	0	1	18	0	75.1	75.4	183	75.25	19.1051	63.981	116	66	152	48	93	53	82	1	0	0	0	0	0	0	0	0	0	0	0	0	0	0	0	0	0	0	0	0	0	0	0	0	0	0	0
2	3	5	0	99	16	2	18	0	83.9	83.5	153	83.7	24.5414	57.449	144	97	159	55	85	96	76	1	0	1	0	0	1	0	1	0	0	1	0	0	1	0	0	0	0	0	1	0	0	1	0	0	0	1	0
2	1	4	0	99	3	1	18	0	85.7	85.6	177	85.65	20.8813	65.419	113	65	141	36	90	74	80	1	0	0	1	0	0	0	1	0	0	0	1	0	1	0	0	0	1	0	1	0	0	0	0	1	0	1	0
2	2	2	0	99	0	1	18	0	106.9	107.6	177	107.25	31.611	99.034	121	83	189	46	107	179	88	1	0	1	0	1	0	0	1	1	0	0	0	1	2	0	1	0	0	1	2	0	1	1	0	0	1	3	1
2	3	4	0	99	0	2	18	0	76.5	76.9	159	76.7	23.6632	59.823	117	79	145	41	91	67	79	1	0	0	1	0	0	0	1	0	0	0	0	0	0	0	0	0	1	0	1	0	0	0	0	0	0	0	0
2	2	5	0	99	10	2	18	0	75.4	74.7	160	75.05	21.2867	54.494	94	61	187	76	97	71	72	1	0	0	0	0	0	0	0	0	0	0	0	0	0	0	0	0	0	0	0	0	0	0	0	0	0	0	0
2	3	4	0	99	2	2	18	0	91.9	92.9	166	92.4	29.2662	80.646	108	63	148	53	80	73	85	1	0	1	0	0	0	0	0	1	0	0	0	0	1	0	1	0	0	0	1	0	1	0	0	0	0	1	0
1	3	99	1	1	14	1	18	0	83	83.2	180	83.1	22.7339	73.658	125	87	136	29	68	194	75	1	0	0	1	1	0	0	2	0	0	0	1	1	2	0	0	0	1	1	2	0	0	1	0	1	1	3	1
2	3	4	0	99	4	1	18	0	74	74.1	164	74.05	19.1452	51.493	137	87	143	39	82	112	94	1	0	0	1	0	1	0	2	0	0	1	1	1	3	1	0	0	1	1	3	1	0	1	0	1	1	3	1
2	2	4	0	99	7	1	18	0	82.2	81.7	168	81.95	22.0298	62.177	113	71	172	48	110	68	85	1	0	0	0	0	0	0	0	0	0	0	0	0	0	0	0	0	0	0	0	0	0	0	0	0	0	0	0
2	3	5	0	99	8	2	18	0	85.1	85.5	158	85.3	23.6112	58.943	97	58	141	47	73	105	84	1	0	1	1	0	0	0	1	0	0	0	0	0	0	0	1	0	1	1	3	1	0	0	0	0	0	0	0
5	1	2	0	99	0	1	18	0	97.7	98	177	97.85	26.5109	83.056	131	75	181	38	113	149	108	1	1	1	1	0	0	1	2	1	0	0	1	1	3	1	1	0	1	1	3	1	1	1	0	1	1	4	1
2	3	5	0	99	0	2	18	0	83.7	83.8	161	83.75	22.334	57.892	110	74	156	52	95	47	87	1	0	1	0	0	0	0	0	0	0	0	0	0	0	0	0	0	0	0	0	0	0	0	0	0	0	0	0
2	3	2	0	99	0	2	18	0	84.1	84	148	84.05	26.0651	57.093	107	71	192	39	134	95	98	1	0	1	1	0	0	0	1	0	0	0	1	0	1	0	0	0	1	0	1	0	0	0	0	1	0	1	0
2	3	5	0	99	0	2	18	0	78	77.7	163	77.85	21.0245	55.86	107	70	158	56	90	62	79	1	0	0	0	0	0	0	0	0	0	0	0	0	0	0	0	0	0	0	0	0	0	0	0	0	0	0	0
2	1	4	0	99	0	1	18	0	79.5	79.9	178	79.7	18.7123	59.288	100	61	147	54	79	71	88	1	0	0	0	0	0	0	0	0	0	0	0	0	0	0	0	0	0	0	0	0	0	0	0	0	0	0	0
5	3	4	0	99	1	1	18	0	84.4	84.2	168	84.3	23.8953	67.442	119	71	196	47	125	120	90	1	0	0	0	0	0	0	0	0	0	0	0	1	1	0	0	0	0	1	1	0	0	0	0	0	1	1	0
10	1	5	1	0	10	2	18	0	82.2	81.9	158	82.05	22.5877	56.388	102	72	193	40	130	115	111	1	1	1	1	0	0	1	2	0	1	0	1	1	3	1	0	1	1	1	3	1	0	0	1	1	1	3	1
2	3	2	0	99	0	2	18	0	72.1	72.7	167	72.4	18.0265	50.274	102	69	158	52	93	63	103	1	1	0	0	0	0	0	1	0	0	0	0	0	0	0	0	0	0	0	0	0	0	0	0	0	0	0	0
2	3	99	0	99	0	2	18	0	70.9	70.8	166	70.85	18.1728	50.077	96	64	187	56	116	77	128	1	1	0	0	0	0	0	1	0	1	0	0	0	1	0	0	1	0	0	1	0	0	0	1	0	0	1	0
2	3	99	0	99	0	2	18	0	71.3	71	160	71.15	17.5742	44.99	104	78	180	37	130	65	78	1	0	0	1	0	0	0	1	0	0	0	1	0	1	0	0	0	1	0	1	0	0	0	0	1	0	1	0
2	1	4	99	99	0	1	18	0	86.5	87	175	86.75	21.7313	66.552	118	75	133	29	87	85	132	1	1	0	1	0	0	0	2	0	1	0	1	0	2	0	0	1	1	0	2	0	0	0	1	1	0	2	0
4	3	4	1	1	13	1	18	0	87.4	86.5	167	86.95	24.7155	68.929	146	90	191	48	117	131	96	1	0	0	0	0	1	0	1	0	0	1	0	1	2	0	0	0	0	1	2	0	0	1	0	0	1	2	0
4	3	3	0	99	8	1	18	0	76	76.7	173	76.35	18.1099	54.201	105	62	95	63	24	38	100	1	1	0	0	0	0	0	1	0	0	0	0	0	0	0	0	0	0	0	0	0	0	0	0	0	0	0	0
2	3	0	0	99	3	1	18	0	76	75.3	175	75.65	17.1827	52.622	102	61	174	53	109	60	101	1	1	0	0	0	0	0	1	0	0	0	0	0	0	0	0	0	0	0	0	0	0	0	0	0	0	0	0
5	2	3	0	99	0	2	18	0	76	75.7	160	75.85	19.1457	49.013	102	61	114	48	60	28	83	1	0	0	1	0	0	0	1	0	0	0	0	0	0	0	0	0	1	0	1	0	0	0	0	0	0	0	0
2	3	4	0	99	6	1	18	0	80.6	81.5	175	81.05	19.985	61.204	130	69	158	45	104	46	83	1	0	0	0	0	0	0	0	0	0	0	0	0	0	0	0	0	0	0	0	0	0	0	0	0	0	0	0
2	1	1	0	99	8	1	18	0	75.2	76.2	170	75.7	17.5806	50.808	117	61	152	47	87	92	88	1	0	0	0	0	0	0	0	0	0	0	0	0	0	0	0	0	0	0	0	0	0	0	0	0	0	0	0
4	1	3	0	99	0	1	18	0	83	83	171	83	21.3662	62.477	117	61	149	48	89	58	87	1	0	0	0	0	0	0	0	0	0	0	0	0	0	0	0	0	0	0	0	0	0	0	0	0	0	0	0
4	2	5	0	99	4	1	18	0	74.3	74.5	166	74.4	20.4667	56.398	111	62	115	57	48	52	86	1	0	0	0	0	0	0	0	0	0	0	0	0	0	0	0	0	0	0	0	0	0	0	0	0	0	0	0
2	3	3	0	99	0	1	18	0	80.4	80.5	180	80.45	17.1781	55.657	118	72	134	45	78	53	98	1	0	0	0	0	0	0	0	0	0	0	0	0	0	0	0	0	0	0	0	0	0	0	0	0	0	0	0
2	3	3	0	99	0	1	18	0	79.2	79.2	181	79.2	18.8788	61.849	110	61	168	66	84	89	94	1	0	0	0	0	0	0	0	0	0	0	0	0	0	0	0	0	0	0	0	0	0	0	0	0	0	0	0
2	3	4	0	99	5	1	18	0	79.3	78.4	171	78.85	20.1775	59.001	120	56	177	39	108	150	81	1	0	0	1	1	0	0	2	0	0	0	1	1	2	0	0	0	1	1	2	0	0	0	0	1	1	2	0
2	3	5	0	99	6	2	18	0	77	77.7	161	77.35	18.6725	48.401	95	64	147	44	94	46	80	1	0	0	1	0	0	0	1	0	0	0	0	0	0	0	0	0	1	0	1	0	0	0	0	0	0	0	0
2	3	3	0	99	9	1	18	0	93.3	93.4	174	93.35	25.4479	77.046	120	80	155	42	95	91	95	1	0	0	0	0	0	0	0	0	0	0	0	0	0	0	1	0	1	0	2	0	0	1	0	0	0	1	0
2	2	99	0	99	7	1	18	0	75.9	76.3	164	76.1	20.7131	55.71	118	68	171	51	98	112	150	1	1	0	0	0	0	0	1	0	1	0	0	1	2	0	0	1	0	1	2	0	0	0	1	0	1	2	0
2	1	2	0	99	0	2	18	0	81.2	81.2	156	81.2	22.7149	55.279	125	84	159	57	88	72	89	1	0	1	0	0	0	0	0	0	0	1	0	0	1	0	0	0	0	0	1	0	0	1	0	0	0	1	0
2	3	5	1	0	9	1	18	0	102.9	102.5	177	102.7	27.7455	86.924	132	75	151	36	102	63	93	1	0	1	1	0	0	0	1	1	0	0	1	0	2	0	1	0	1	0	2	0	1	1	0	1	0	3	1
2	3	4	0	99	2	1	18	0	81.7	81.8	170	81.75	21.9294	63.376	124	81	155	54	79	112	64	1	0	0	0	0	0	0	0	0	0	0	0	1	1	0	0	0	0	1	1	0	0	1	0	0	1	2	0
5	3	4	1	0	0	2	18	0	87.9	87.6	174	87.75	22.2159	67.261	114	72	181	42	118	105	95	1	0	1	1	0	0	0	1	0	0	0	0	0	0	0	1	0	1	1	3	1	0	0	0	0	0	0	0
2	3	3	0	99	0	1	18	0	70.5	70.9	169	70.7	15.0075	42.863	125	78	132	38	85	44	114	1	1	0	1	0	0	0	2	0	1	0	1	0	2	0	0	1	1	0	2	0	0	0	1	1	0	2	0
2	3	2	0	99	0	1	18	0	74.8	74.7	171	74.75	18.8195	55.03	126	73	170	43	99	141	92	1	0	0	0	0	0	0	0	0	0	0	0	1	1	0	0	0	1	1	2	0	0	0	0	0	1	1	0
2	3	5	0	99	0	2	18	0	70.8	71.1	163	70.95	16.8384	44.738	101	74	190	48	130	61	77	1	0	0	1	0	0	0	1	0	0	0	0	0	0	0	0	0	1	0	1	0	0	0	0	0	0	0	0
2	2	3	0	99	3	1	18	0	86.1	86.7	178	86.4	24.217	76.729	132	77	171	50	94	135	82	1	0	0	0	0	0	0	0	0	0	0	0	1	1	0	0	0	0	1	1	0	0	1	0	0	1	2	0
5	1	1	0	99	12	1	18	0	79.9	80.4	175	80.15	20.975	64.236	118	66	153	39	93	105	85	1	0	0	1	0	0	0	1	0	0	0	1	0	1	0	0	0	1	1	2	0	0	0	0	1	0	1	0
2	3	5	0	99	0	2	18	0	98.3	98.3	161	98.3	29.6408	76.832	123	74	124	54	54	78	88	1	0	1	0	0	0	0	0	1	0	0	0	0	1	0	1	0	0	0	1	0	1	0	0	0	0	1	0
2	3	99	0	99	9	2	18	0	79.4	79	152	79.2	23.3544	53.958	130	86	194	40	131	86	86	1	0	0	1	0	1	0	2	0	0	1	1	0	2	0	0	0	1	0	2	0	0	1	0	1	0	2	0
2	2	99	0	99	0	1	18	0	77.2	77.6	179	77.4	16.9196	54.212	116	66	130	50	63	84	93	1	0	0	0	0	0	0	0	0	0	0	0	0	0	0	0	0	0	0	0	0	0	0	0	0	0	0	0
2	3	5	0	99	3	2	18	0	75	75	154	75	22.0568	52.31	109	75	166	43	105	88	84	1	0	0	1	0	0	0	1	0	0	0	0	0	0	0	0	0	1	0	1	0	0	0	0	0	0	0	0
5	3	3	0	99	0	1	18	0	68.7	68.3	175	68.5	16.1133	49.347	105	67	133	50	72	54	88	1	0	0	0	0	0	0	0	0	0	0	0	0	0	0	0	0	0	0	0	0	0	0	0	0	0	0	0
5	1	1	0	99	7	2	18	0	74.5	74.6	160	74.55	18.5324	47.443	101	75	141	50	73	89	138	1	1	0	0	0	0	0	1	0	1	0	0	0	1	0	0	1	0	0	1	0	0	0	1	0	0	1	0
2	3	2	0	99	0	1	18	0	99.5	99.2	177	99.35	28.7666	90.123	135	82	183	36	120	135	87	1	0	1	1	0	0	0	1	1	0	0	1	1	3	1	1	0	1	1	3	1	1	1	0	1	1	4	1
5	1	0	0	99	3	1	18	0	81.9	82	176	81.95	20.3993	63.189	109	73	117	44	64	44	77	1	0	0	0	0	0	0	0	0	0	0	0	0	0	0	0	0	1	0	1	0	0	0	0	0	0	0	0
5	3	3	0	99	14	2	18	0	87.2	87.3	172	87.25	21.0621	62.31	98	66	164	57	93	70	76	1	0	1	0	0	0	0	0	0	0	0	0	0	0	0	1	0	0	0	1	0	0	0	0	0	0	0	0
2	1	99	0	99	0	1	18	0	78	77.1	165	77.55	17.9093	48.758	106	69	176	46	112	88	84	1	0	0	0	0	0	0	0	0	0	0	0	0	0	0	0	0	0	0	0	0	0	0	0	0	0	0	0
2	3	2	0	99	0	2	18	0	88.9	89.8	163	89.35	25.235	67.047	147	79	178	46	101	153	105	1	1	1	1	1	0	1	3	0	0	1	0	1	2	0	1	0	1	1	4	1	0	1	0	0	1	2	0
2	3	2	0	99	0	2	18	0	71.9	72	162	71.95	18.4572	48.439	101	56	147	44	80	114	91	1	0	0	1	0	0	0	1	0	0	0	0	1	1	0	0	0	1	1	2	0	0	0	0	0	1	1	0
5	3	3	0	99	0	2	18	0	71.3	71	155	71.15	19.2583	46.268	102	68	132	54	68	51	76	1	0	0	0	0	0	0	0	0	0	0	0	0	0	0	0	0	0	0	0	0	0	0	0	0	0	0	0
2	3	99	0	99	9	1	18	0	93	92.9	165	92.95	28.5833	77.818	125	86	192	35	123	169	97	1	0	0	1	1	0	0	2	0	0	0	1	1	2	0	1	0	1	1	3	1	0	1	0	1	1	3	1
2	3	4	0	99	0	2	18	0	77.8	77.1	162	77.45	19.1137	50.162	113	76	151	48	83	98	93	1	0	0	1	0	0	0	1	0	0	0	0	0	0	0	0	0	1	0	1	0	0	0	0	0	0	0	0
2	1	99	0	99	3	1	18	0	75.1	74.7	170	74.9	20.3318	58.759	139	81	163	45	100	91	88	1	0	0	0	0	0	0	0	0	0	1	0	0	1	0	0	0	0	0	1	0	0	1	0	0	0	1	0
5	1	4	0	99	10	2	18	0	72.9	73.9	167	73.4	23.8746	66.584	111	69	175	61	100	72	81	1	0	0	0	0	0	0	0	0	0	0	0	0	0	0	0	0	0	0	0	0	0	0	0	0	0	0	0
9	3	0	0	99	12	1	18	0	92.7	93.3	178	93	25.6981	81.422	122	75	175	71	89	73	88	1	0	0	0	0	0	0	0	0	0	0	0	0	0	0	1	0	0	0	1	0	0	0	0	0	0	0	0
5	1	1	0	99	2	1	18	0	96.2	96.5	179	96.35	25.8828	82.931	122	70	276	55	188	165	102	1	1	1	0	1	0	1	2	1	0	0	0	1	2	0	1	0	0	1	2	0	1	0	0	0	1	2	0
5	1	0	0	99	0	1	18	0	88.5	88.2	169	88.35	22.7664	65.023	126	80	177	51	111	75	90	1	0	0	0	0	0	0	0	0	0	0	0	0	0	0	1	0	0	0	1	0	0	1	0	0	0	1	0
5	1	1	0	99	9	1	18	0	86.3	86.7	172	86.5	23.123	68.407	121	67	225	52	147	132	129	1	1	0	0	0	0	0	1	0	1	0	0	1	2	0	0	1	0	1	2	0	0	0	1	0	1	2	0
2	2	1	0	99	0	1	18	0	92.5	92.7	166	92.6	26.2302	72.28	123	66	163	36	100	137	74	1	0	0	1	0	0	0	1	0	0	0	1	1	2	0	1	0	1	1	3	1	0	0	0	1	1	2	0
5	3	1	0	99	3	1	18	0	72.3	73.1	160	72.7	18.1805	46.542	103	63	133	39	78	82	81	1	0	0	1	0	0	0	1	0	0	0	1	0	1	0	0	0	1	0	1	0	0	0	0	1	0	1	0
2	2	1	0	99	0	2	18	0	74.2	74.8	160	74.5	20.7539	53.13	108	81	105	41	50	72	68	1	0	0	1	0	0	0	1	0	0	0	0	0	0	0	0	0	1	0	1	0	0	1	0	0	0	1	0
2	3	4	0	99	0	2	18	0	78.2	78.2	153	78.2	22.4683	52.596	93	63	144	43	89	61	96	1	0	0	1	0	0	0	1	0	0	0	0	0	0	0	0	0	1	0	1	0	0	0	0	0	0	0	0
5	3	0	0	99	7	1	18	0	82.2	81.2	180	81.7	20.2235	65.524	114	68	224	41	161	112	87	1	0	0	0	0	0	0	0	0	0	0	0	1	1	0	0	0	1	1	2	0	0	0	0	0	1	1	0
2	1	2	0	99	0	2	18	0	70.3	70.2	155	70.25	18.3313	44.041	107	71	151	55	80	82	92	1	0	0	0	0	0	0	0	0	0	0	0	0	0	0	0	0	0	0	0	0	0	0	0	0	0	0	0
1	3	5	99	99	0	1	18	0	73.5	72.5	165	73	19.5552	53.239	124	82	153	57	86	50	97	1	0	0	0	0	0	0	0	0	0	0	0	0	0	0	0	0	0	0	0	0	0	1	0	0	0	1	0
2	3	5	0	99	15	2	18	0	68.8	68.1	169	68.45	15.8737	45.337	104	69	153	36	92	123	73	1	0	0	1	0	0	0	1	0	0	0	1	1	2	0	0	0	1	1	2	0	0	0	0	1	1	2	0
2	3	5	0	99	0	2	18	0	67.1	66.6	160	66.85	18.284	46.807	98	66	134	46	75	67	77	1	0	0	1	0	0	0	1	0	0	0	0	0	0	0	0	0	1	0	1	0	0	0	0	0	0	0	0
5	1	5	0	99	0	2	18	0	75.4	75.9	161.8	75.65	19.3478	50.651	100	70	148	50	81	85	118	1	1	0	0	0	0	0	1	0	1	0	0	0	1	0	0	1	0	0	1	0	0	0	1	0	0	1	0
2	2	4	1	0	0	2	18	0	92.9	92.7	180	92.8	25.4238	82.373	119	74	122	28	78	79	87	1	0	1	1	0	0	0	1	1	0	0	1	0	2	0	1	0	1	0	2	0	1	0	0	1	0	2	0
4	3	2	0	99	10	2	18	0	87.2	87.6	158	87.4	27.1323	67.733	121	69	183	41	119	117	78	1	0	1	1	0	0	0	1	0	0	0	0	1	1	0	1	0	1	1	3	1	0	0	0	0	1	1	0
2	2	3	0	99	0	1	18	0	95.5	95.9	170	95.7	28.9744	83.736	123	66	159	36	94	145	91	1	0	1	1	0	0	0	1	1	0	0	1	1	3	1	1	0	1	1	3	1	1	0	0	1	1	3	1
2	3	5	0	99	3	2	18	0	77	77.2	160	77.1	22.5762	57.795	118	71	139	51	79	43	133	1	1	0	0	0	0	0	1	0	1	0	0	0	1	0	0	1	0	0	1	0	0	0	1	0	0	1	0
5	3	2	0	99	0	1	18	0	82.4	83.3	189	82.85	21.1005	75.373	125	69	121	47	60	69	95	1	0	0	0	0	0	0	0	0	0	0	0	0	0	0	0	0	0	0	0	0	0	0	0	0	0	0	0
2	1	4	0	99	0	2	18	0	88.5	88.8	163	88.65	27.2554	72.415	120	75	187	53	120	70	85	1	0	1	0	0	0	0	0	0	0	0	0	0	0	0	1	0	0	0	1	0	0	0	0	0	0	0	0
2	1	4	1	0	0	1	18	0	77.6	77.7	164	77.65	20.7838	55.9	110	70	179	46	111	110	83	1	0	0	0	0	0	0	0	0	0	0	0	1	1	0	0	0	0	1	1	0	0	0	0	0	1	1	0
2	2	3	0	99	12	1	18	0	82.6	82.7	165	82.65	25.1038	68.345	131	65	130	47	71	60	81	1	0	0	0	0	0	0	0	0	0	0	0	0	0	0	0	0	0	0	0	0	0	1	0	0	0	1	0
5	2	1	0	99	0	2	18	0	65.7	65.9	154	65.8	16.714	39.639	95	62	180	71	100	47	83	1	0	0	0	0	0	0	0	0	0	0	0	0	0	0	0	0	0	0	0	0	0	0	0	0	0	0	0
4	3	4	0	99	0	1	18	0	75.9	75.8	182	75.85	18.0211	59.693	125	70	136	63	60	65	83	1	0	0	0	0	0	0	0	0	0	0	0	0	0	0	0	0	0	0	0	0	0	0	0	0	0	0	0
2	3	3	0	99	0	1	18	0	71.4	71.6	165	71.5	19.0847	51.958	101	66	178	34	124	100	118	1	1	0	1	0	0	0	2	0	1	0	1	0	2	0	0	1	1	1	3	1	0	0	1	1	0	2	0
2	3	4	0	99	0	1	18	0	72.8	73.3	167	73.05	18.9476	52.843	102	63	159	50	95	71	104	1	1	0	0	0	0	0	1	0	0	0	0	0	0	0	0	0	0	0	0	0	0	0	0	0	0	0	0
2	3	3	0	99	0	2	18	0	82.8	83.6	157	83.2	24.1154	59.442	118	79	205	51	137	84	79	1	0	1	0	0	0	0	0	0	0	1	0	0	1	0	0	0	0	0	1	0	0	0	0	0	0	0	0
2	3	2	0	99	6	1	18	0	78.3	77.7	168	78	18.502	52.22	122	71	174	64	96	70	85	1	0	0	0	0	0	0	0	0	0	0	0	0	0	0	0	0	0	0	0	0	0	0	0	0	0	0	0
2	2	4	0	99	3	2	18	0	75.1	75.8	157	75.45	21.7055	53.502	112	75	179	28	83	339	81	1	0	0	1	1	0	0	2	0	0	0	1	1	2	0	0	0	1	1	2	0	0	0	0	1	1	2	0
2	1	1	0	99	7	1	18	0	78.6	78.5	172	78.55	19.7776	58.51	123	64	125	47	68	48	97	1	0	0	0	0	0	0	0	0	0	0	0	0	0	0	0	0	0	0	0	0	0	0	0	0	0	0	0
2	3	4	0	99	0	1	18	0	90.3	90.2	182	90.25	23.9434	79.31	138	69	136	26	83	133	112	1	1	0	1	0	0	0	2	0	1	0	1	1	3	1	1	1	1	1	4	1	0	1	1	1	1	4	1
2	3	2	0	99	9	1	18	0	85.3	85.8	177	85.55	23.3445	73.136	117	72	116	33	51	161	87	1	0	0	1	1	0	0	2	0	0	0	1	1	2	0	0	0	1	1	2	0	0	0	0	1	1	2	0
9	2	2	0	99	1	2	18	0	82	81.7	165	81.85	24.2226	65.946	118	75	166	51	94	104	84	1	0	1	0	0	0	0	0	0	0	0	0	0	0	0	0	0	0	1	1	0	0	0	0	0	0	0	0
5	3	4	0	99	3	2	18	0	66.3	66.7	159	66.5	18.8205	47.58	108	62	198	72	113	63	86	1	0	0	0	0	0	0	0	0	0	0	0	0	0	0	0	0	0	0	0	0	0	0	0	0	0	0	0
2	3	99	0	99	0	2	18	0	73.7	72.8	153	73.25	19.9573	46.718	111	75	140	52	73	76	81	1	0	0	0	0	0	0	0	0	0	0	0	0	0	0	0	0	0	0	0	0	0	0	0	0	0	0	0
2	1	5	1	1	15	2	18	0	76.4	76.8	155	76.6	21.389	51.387	99	68	131	36	81	72	77	1	0	0	1	0	0	0	1	0	0	0	1	0	1	0	0	0	1	0	1	0	0	0	0	1	0	1	0
2	3	99	0	99	0	1	18	0	76.3	75.9	172	76.1	19.9033	58.882	114	72	171	55	98	91	102	1	1	0	0	0	0	0	1	0	0	0	0	0	0	0	0	0	0	0	0	0	0	0	0	0	0	0	0
2	3	5	0	99	0	1	18	0	73.7	73.4	156	73.55	17.3106	42.127	108	72	159	51	96	61	120	1	1	0	0	0	0	0	1	0	1	0	0	0	1	0	0	1	0	0	1	0	0	0	1	0	0	1	0
2	3	5	0	99	3	2	18	0	80.8	81.6	164	81.2	19.6895	52.957	105	72	147	43	90	69	82	1	0	1	1	0	0	0	1	0	0	0	0	0	0	0	0	0	1	0	1	0	0	0	0	0	0	0	0
2	2	2	1	1	21	1	18	0	80	80.8	174	80.4	22.32	67.576	138	65	119	38	61	98	95	1	0	0	1	0	0	0	1	0	0	0	1	0	1	0	0	0	1	0	1	0	0	1	0	1	0	2	0
2	3	4	0	99	0	1	18	0	71.7	70.9	171	71.3	17.1492	50.146	118	78	136	46	78	58	95	1	0	0	0	0	0	0	0	0	0	0	0	0	0	0	0	0	0	0	0	0	0	0	0	0	0	0	0
10	3	5	0	99	23	1	18	0	76.3	75.9	162	76.1	19.3419	50.761	124	76	162	39	86	183	99	1	0	0	1	1	0	0	2	0	0	0	1	1	2	0	0	0	1	1	2	0	0	0	0	1	1	2	0
4	3	4	0	99	0	2	18	0	62.6	63.6	157	63.1	16.7029	41.171	99	61	168	61	93	69	68	1	0	0	0	0	0	0	0	0	0	0	0	0	0	0	0	0	0	0	0	0	0	0	0	0	0	0	0
3	3	3	0	99	0	1	18	0	82.6	82.8	165	82.7	20.1763	54.93	110	68	146	55	81	49	78	1	0	0	0	0	0	0	0	0	0	0	0	0	0	0	0	0	0	0	0	0	0	0	0	0	0	0	0
1	3	99	0	99	0	2	18	0	92	92	164	92	24.9141	67.009	116	80	216	39	136	207	85	1	0	1	1	1	0	1	2	1	0	0	1	1	3	1	1	0	1	1	3	1	1	1	0	1	1	4	1
2	3	99	0	99	6	2	18	0	80.1	80.9	158	80.5	22.9426	57.274	116	81	196	58	127	56	80	1	0	1	0	0	0	0	0	0	0	0	0	0	0	0	0	0	0	0	0	0	0	1	0	0	0	1	0
2	3	2	0	99	3	2	18	0	80.8	80.9	165	80.85	20.6744	56.286	99	66	187	51	112	121	82	1	0	1	0	0	0	0	0	0	0	0	0	1	1	0	0	0	0	1	1	0	0	0	0	0	1	1	0
2	3	4	0	99	0	2	18	0	104	104.7	156	104.35	38.109	92.742	113	72	149	37	90	111	105	1	1	1	1	0	0	1	2	1	0	0	1	1	3	1	1	0	1	1	3	1	1	0	0	1	1	3	1
2	3	5	0	99	10	2	18	0	76.5	76.5	148	76.5	21.4856	47.062	112	80	219	46	141	159	173	1	1	0	1	1	0	0	3	0	1	0	0	1	2	0	0	1	1	1	3	1	0	1	1	0	1	3	1
4	2	2	0	99	0	2	18	0	73.6	73.2	152	73.4	19.6118	45.311	104	67	171	56	99	82	84	1	0	0	0	0	0	0	0	0	0	0	0	0	0	0	0	0	0	0	0	0	0	0	0	0	0	0	0
2	1	5	0	99	0	2	18	0	80.5	80.7	155	80.6	22.4241	53.874	110	77	200	40	112	240	92	1	0	1	1	1	0	1	2	0	0	0	1	1	2	0	0	0	1	1	2	0	0	0	0	1	1	2	0
5	3	2	0	99	4	1	18	0	68.3	69.3	172	68.8	17.4047	51.49	102	67	163	53	96	68	83	1	0	0	0	0	0	0	0	0	0	0	0	0	0	0	0	0	0	0	0	0	0	0	0	0	0	0	0
2	3	4	0	99	0	1	18	0	81	81.1	178	81.05	18.2954	57.967	118	75	169	47	109	67	235	1	1	0	0	0	0	0	1	0	1	0	0	0	1	0	0	1	0	0	1	0	0	0	1	0	0	1	0
2	3	3	0	99	0	1	18	0	83.5	83.6	180	83.55	22.5759	73.146	136	87	169	86	63	99	77	1	0	0	0	0	1	0	1	0	0	0	0	0	0	0	0	0	0	0	0	0	0	1	0	0	0	1	0
2	3	5	0	99	0	1	18	0	77.3	78.1	177	77.7	18.2706	57.24	131	88	133	46	65	112	86	1	0	0	0	0	1	0	1	0	0	0	0	1	1	0	0	0	0	1	1	0	0	1	0	0	1	2	0
5	1	2	0	99	0	1	18	0	81.1	81.9	163	81.5	20.7712	55.187	125	75	128	53	62	67	111	1	1	0	0	0	0	0	1	0	1	0	0	0	1	0	0	1	0	0	1	0	0	0	1	0	0	1	0
2	3	2	0	99	0	1	18	0	71	71.6	165	71.3	18.0353	49.101	108	66	120	31	75	71	100	1	1	0	1	0	0	0	2	0	0	0	1	0	1	0	0	0	1	0	1	0	0	0	0	1	0	1	0
10	2	99	1	0	14	2	18	0	72.6	73.2	153	72.9	19.0901	44.688	94	66	133	43	77	66	96	1	0	0	1	0	0	0	1	0	0	0	0	0	0	0	0	0	1	0	1	0	0	0	0	0	0	0	0
2	3	3	0	99	1	1	18	0	85.2	85.2	172	85.2	21.4528	63.466	114	70	133	46	72	73	79	1	0	0	0	0	0	0	0	0	0	0	0	0	0	0	0	0	0	0	0	0	0	0	0	0	0	0	0
2	3	3	0	99	4	2	18	0	72.4	71.8	170	72.1	15.7035	45.383	96	69	175	44	112	94	84	1	0	0	1	0	0	0	1	0	0	0	0	0	0	0	0	0	1	0	1	0	0	0	0	0	0	0	0
2	2	5	0	99	0	1	18	0	78.9	78.5	162	78.7	22.6978	59.568	116	64	138	35	83	100	78	1	0	0	1	0	0	0	1	0	0	0	1	0	1	0	0	0	1	1	2	0	0	0	0	1	0	1	0
2	3	4	0	99	12	1	18	0	80.6	81.1	172	80.85	21.704	64.209	129	79	127	41	67	96	87	1	0	0	0	0	0	0	0	0	0	0	0	0	0	0	0	0	1	0	1	0	0	0	0	0	0	0	0
2	3	4	0	99	1	2	18	0	75	76	152	75.5	18.9041	43.676	110	83	167	65	89	66	115	1	1	0	0	0	0	0	1	0	1	0	0	0	1	0	0	1	0	0	1	0	0	1	1	0	0	2	0
10	3	3	0	99	0	2	18	0	77	77.9	158	77.45	19.7408	49.281	107	72	136	48	70	89	109	1	1	0	1	0	0	0	2	0	0	0	0	0	0	0	0	0	1	0	1	0	0	0	0	0	0	0	0
2	3	99	0	99	4	2	18	0	72.2	72.7	161	72.45	19.8086	51.346	102	71	116	44	59	63	83	1	0	0	1	0	0	0	1	0	0	0	0	0	0	0	0	0	1	0	1	0	0	0	0	0	0	0	0
2	2	4	0	99	0	2	18	0	76.6	77.4	154	77	20.3732	48.317	100	66	175	73	70	162	67	1	0	0	0	1	0	0	1	0	0	0	0	1	1	0	0	0	0	1	1	0	0	0	0	0	1	1	0
9	3	2	0	99	0	1	18	0	96.2	96.6	176	96.4	26.6981	82.7	120	66	187	34	109	220	88	1	0	1	1	1	0	1	2	1	0	0	1	1	3	1	1	0	1	1	3	1	1	0	0	1	1	3	1
2	3	5	0	99	12	1	18	0	86.4	87	171	86.7	22.6001	66.085	133	87	154	53	79	108	87	1	0	0	0	0	1	0	1	0	0	1	0	0	1	0	0	0	0	1	2	0	0	1	0	0	0	1	0
2	2	4	0	99	0	2	18	0	84.6	85.3	158	84.95	26.7469	66.771	116	78	111	44	43	119	89	1	0	1	1	0	0	0	1	0	0	0	0	1	1	0	1	0	1	1	3	1	0	0	0	0	1	1	0
2	1	4	0	99	0	1	18	0	86.6	85.6	174	86.1	21.9656	66.503	120	81	143	23	89	153	84	1	0	0	1	1	0	0	2	0	0	0	1	1	2	0	0	0	1	1	2	0	0	1	0	1	1	3	1
2	3	3	0	99	0	2	18	0	69.4	69.6	147	69.5	19.751	42.68	105	65	130	55	66	46	81	1	0	0	0	0	0	0	0	0	0	0	0	0	0	0	0	0	0	0	0	0	0	0	0	0	0	0	0
2	3	5	0	99	2	2	18	0	86.5	86.4	162	86.45	26.9551	70.741	110	70	146	46	88	58	95	1	0	1	1	0	0	0	1	0	0	0	0	0	0	0	1	0	1	0	2	0	0	0	0	0	0	0	0
2	3	99	0	99	0	1	18	0	94.7	94.9	167	94.8	26.0332	72.604	125	69	145	34	96	73	96	1	0	1	1	0	0	0	1	1	0	0	1	0	2	0	1	0	1	0	2	0	1	0	0	1	0	2	0
2	3	4	0	99	0	2	18	0	80.2	79.6	166	79.9	21.2026	58.426	109	63	130	42	77	57	81	1	0	0	1	0	0	0	1	0	0	0	0	0	0	0	0	0	1	0	1	0	0	0	0	0	0	0	0
2	3	99	0	99	0	1	18	0	78.9	79.2	167	79.05	20.1861	56.297	123	90	109	46	54	46	89	1	0	0	0	0	0	0	0	0	0	0	0	0	0	0	0	0	0	0	0	0	0	1	0	0	0	1	0
2	3	4	0	99	0	1	18	0	81.2	80.4	183	80.8	20.5602	68.854	118	75	140	38	48	271	72	1	0	0	1	1	0	0	2	0	0	0	1	1	2	0	0	0	1	1	2	0	0	0	0	1	1	2	0
2	1	99	0	99	0	1	18	0	77	77	172	77	19.9473	59.012	113	67	114	41	63	49	93	1	0	0	0	0	0	0	0	0	0	0	0	0	0	0	0	0	1	0	1	0	0	0	0	0	0	0	0
3	3	3	0	99	0	2	18	0	70.9	70.3	162	70.6	18.8314	49.421	104	73	159	50	85	120	91	1	0	0	0	0	0	0	0	0	0	0	0	1	1	0	0	0	0	1	1	0	0	0	0	0	1	1	0
2	3	3	0	99	0	2	18	0	73.4	73.7	158	73.55	18.0552	45.073	109	71	157	38	95	119	72	1	0	0	1	0	0	0	1	0	0	0	1	1	2	0	0	0	1	1	2	0	0	0	0	1	1	2	0
2	1	3	1	0	10	1	18	0	81.7	82.6	166	82.15	21.7172	59.844	124	77	146	35	73	190	84	1	0	0	1	1	0	0	2	0	0	0	1	1	2	0	0	0	1	1	2	0	0	0	0	1	1	2	0
2	3	2	0	99	0	1	18	0	72.9	72.3	164	72.6	18.5652	49.933	125	68	142	49	81	61	95	1	0	0	0	0	0	0	0	0	0	0	0	0	0	0	0	0	0	0	0	0	0	0	0	0	0	0	0
2	1	4	0	99	0	1	18	0	72.1	72.3	168	72.2	17.624	49.742	104	67	163	49	92	110	88	1	0	0	0	0	0	0	0	0	0	0	0	1	1	0	0	0	0	1	1	0	0	0	0	0	1	1	0
2	3	2	0	99	0	1	18	0	81.9	81.4	156	81.65	20.1344	48.999	123	82	156	46	95	73	92	1	0	0	0	0	0	0	0	0	0	0	0	0	0	0	0	0	0	0	0	0	0	1	0	0	0	1	0
2	99	99	0	99	0	2	18	0	66.5	66.9	160	66.7	16.3414	41.834	104	66	124	38	65	103	76	1	0	0	1	0	0	0	1	0	0	0	1	0	1	0	0	0	1	1	2	0	0	0	0	1	0	1	0
2	3	5	0	99	0	2	18	0	69.4	69.5	151	69.45	19.4601	44.371	110	70	163	66	80	83	94	1	0	0	0	0	0	0	0	0	0	0	0	0	0	0	0	0	0	0	0	0	0	0	0	0	0	0	0
5	2	1	0	99	1	1	18	0	84	83.8	171	83.9	23.1661	67.74	114	64	145	52	82	54	90	1	0	0	0	0	0	0	0	0	0	0	0	0	0	0	0	0	0	0	0	0	0	0	0	0	0	0	0
2	1	3	0	99	2	2	18	0	78.3	77.9	155	78.1	18.7242	44.985	114	79	156	44	84	140	77	1	0	0	1	0	0	0	1	0	0	0	0	1	1	0	0	0	1	1	2	0	0	0	0	0	1	1	0
2	3	5	0	99	0	1	18	0	77.8	76.8	166	77.3	22.1008	60.901	107	71	133	38	71	118	80	1	0	0	1	0	0	0	1	0	0	0	1	1	2	0	0	0	1	1	2	0	0	0	0	1	1	2	0
9	3	4	0	99	0	2	18	0	81.5	81.8	157	81.65	23.1839	57.146	110	74	163	37	108	91	80	1	0	1	1	0	0	0	1	0	0	0	1	0	1	0	0	0	1	0	1	0	0	0	0	1	0	1	0
2	3	99	0	99	0	2	18	0	77.6	78	157	77.8	20.4657	50.446	124	83	200	56	124	98	136	1	1	0	0	0	0	0	1	0	1	1	0	0	2	0	0	1	0	0	2	0	0	1	1	0	0	2	0
5	2	1	0	99	7	1	18	0	93.1	93.7	181	93.4	26.4037	86.501	134	75	139	65	51	115	90	1	0	0	0	0	0	0	0	0	0	0	0	1	1	0	1	0	0	1	2	0	0	1	0	0	1	2	0
2	1	2	0	99	12	1	18	0	91.9	92.3	168	92.1	25.5804	72.198	122	73	206	53	129	118	86	1	0	0	0	0	0	0	0	0	0	0	0	1	1	0	1	0	0	1	2	0	0	0	0	0	1	1	0
2	1	2	0	99	5	1	18	0	103.2	103.4	190	103.3	26.1025	94.23	123	71	92	45	30	85	80	1	0	1	0	0	0	0	0	1	0	0	0	0	1	0	1	0	0	0	1	0	1	0	0	0	0	1	0
4	2	2	0	99	0	1	18	0	80	80.6	176	80.3	20.8284	64.518	102	54	164	48	98	91	91	1	0	0	0	0	0	0	0	0	0	0	0	0	0	0	0	0	0	0	0	0	0	0	0	0	0	0	0
10	3	99	1	1	14	1	18	0	73.6	73.3	167	73.45	18.6747	52.082	117	74	153	39	97	87	94	1	0	0	1	0	0	0	1	0	0	0	1	0	1	0	0	0	1	0	1	0	0	0	0	1	0	1	0
2	2	3	0	99	6	1	18	0	77.9	77.9	176	77.9	19.4647	60.294	104	68	158	66	79	65	77	1	0	0	0	0	0	0	0	0	0	0	0	0	0	0	0	0	0	0	0	0	0	0	0	0	0	0	0
2	3	4	0	99	0	2	18	0	79.6	78.6	163	79.1	22.5978	60.04	115	81	149	54	72	117	97	1	0	0	0	0	0	0	0	0	0	0	0	1	1	0	0	0	0	1	1	0	0	1	0	0	1	2	0
2	3	4	1	1	7	1	18	0	77.4	76.9	167	77.15	19.8591	55.385	108	71	179	50	105	119	98	1	0	0	0	0	0	0	0	0	0	0	0	1	1	0	0	0	0	1	1	0	0	0	0	0	1	1	0
2	3	4	0	99	8	1	18	0	81.3	80.5	176	80.9	20.0081	61.977	117	69	142	49	79	72	87	1	0	0	0	0	0	0	0	0	0	0	0	0	0	0	0	0	0	0	0	0	0	0	0	0	0	0	0
2	3	4	0	99	0	1	18	0	74.6	75.2	165	74.9	20.2402	55.104	111	74	143	29	86	138	91	1	0	0	1	0	0	0	1	0	0	0	1	1	2	0	0	0	1	1	2	0	0	0	0	1	1	2	0
4	3	4	0	99	0	2	18	0	72.7	73.2	154	72.95	21.0234	49.859	111	73	140	62	68	50	84	1	0	0	0	0	0	0	0	0	0	0	0	0	0	0	0	0	0	0	0	0	0	0	0	0	0	0	0
2	3	3	0	99	6	2	18	0	75.2	74.8	157	75	17.9346	44.207	107	71	166	38	101	133	97	1	0	0	1	0	0	0	1	0	0	0	1	1	2	0	0	0	1	1	2	0	0	0	0	1	1	2	0
2	3	2	1	1	20	1	18	0	115	115.4	178	115.2	37.8267	119.85	135	72	196	39	138	96	92	1	0	1	1	0	0	0	1	1	0	0	1	0	2	0	1	0	1	0	2	0	1	1	0	1	0	3	1
2	2	4	0	99	0	1	18	0	76.3	75.9	164	76.1	19.5988	52.713	115	63	155	58	81	78	99	1	0	0	0	0	0	0	0	0	0	0	0	0	0	0	0	0	0	0	0	0	0	0	0	0	0	0	0
2	2	4	0	99	0	2	18	0	80.4	80.6	156	80.5	21.5031	52.33	115	82	178	36	127	77	80	1	0	1	1	0	0	0	1	0	0	0	1	0	1	0	0	0	1	0	1	0	0	1	0	1	0	2	0
2	3	5	0	99	0	2	18	0	88.5	88.6	156	88.55	23.3399	56.8	100	68	231	53	161	83	70	1	0	1	0	0	0	0	0	0	0	0	0	0	0	0	1	0	0	0	1	0	0	0	0	0	0	0	0
2	3	4	0	99	0	2	18	0	71.2	71.4	156	71.3	17.936	43.649	100	69	183	69	104	51	78	1	0	0	0	0	0	0	0	0	0	0	0	0	0	0	0	0	0	0	0	0	0	0	0	0	0	0	0
2	1	99	0	99	0	1	18	0	136.8	137	177	136.9	44.5632	139.612	156	102	150	46	77	133	94	1	0	1	0	0	1	0	1	1	0	1	0	1	3	1	1	0	0	1	3	1	1	1	0	0	1	3	1
2	3	3	0	99	3	2	18	0	69.2	69.3	160	69.25	17.4934	44.783	104	73	112	55	47	49	84	1	0	0	0	0	0	0	0	0	0	0	0	0	0	0	0	0	0	0	0	0	0	0	0	0	0	0	0
2	2	5	0	99	0	1	18	0	80.3	81.2	192	80.75	21.521	79.335	125	71	128	49	67	58	84	1	0	0	0	0	0	0	0	0	0	0	0	0	0	0	0	0	0	0	0	0	0	0	0	0	0	0	0
2	3	4	0	99	0	1	18	0	81.3	80.8	163	81.05	23.442	62.283	129	72	162	44	94	121	82	1	0	0	0	0	0	0	0	0	0	0	0	1	1	0	0	0	1	1	2	0	0	0	0	0	1	1	0
2	3	2	1	1	12	1	18	0	90.3	90.7	167	90.5	26.9791	75.242	123	86	153	67	78	41	87	1	0	0	0	0	0	0	0	0	0	0	0	0	0	0	1	0	0	0	1	0	0	1	0	0	0	1	0
2	1	4	0	99	0	2	18	0	94	94.8	157	94.4	30.0775	74.138	119	78	277	41	191	223	106	1	1	1	1	1	0	1	3	1	0	0	0	1	2	0	1	0	1	1	3	1	1	0	0	0	1	2	0
2	3	99	0	99	0	2	18	0	74.3	74.4	155	74.35	21.0281	50.52	101	70	160	46	101	65	95	1	0	0	1	0	0	0	1	0	0	0	0	0	0	0	0	0	1	0	1	0	0	0	0	0	0	0	0
9	2	2	0	99	0	2	18	0	79.1	79	165	79.05	23.1519	63.031	105	69	162	46	109	37	90	1	0	0	1	0	0	0	1	0	0	0	0	0	0	0	0	0	1	0	1	0	0	0	0	0	0	0	0
5	3	5	0	99	0	1	18	0	73.8	73.6	174	73.7	17.8683	54.098	128	74	171	42	113	79	70	1	0	0	0	0	0	0	0	0	0	0	0	0	0	0	0	0	1	0	1	0	0	0	0	0	0	0	0
2	3	1	0	99	12	1	18	0	85.7	85.6	173	85.65	20.9623	62.738	110	70	139	32	58	247	92	1	0	0	1	1	0	0	2	0	0	0	1	1	2	0	0	0	1	1	2	0	0	0	0	1	1	2	0
2	3	1	0	99	8	1	18	0	88.3	88.4	171	88.35	25.047	73.24	126	74	173	51	104	91	107	1	1	0	0	0	0	0	1	0	0	0	0	0	0	0	1	0	0	0	1	0	0	0	0	0	0	0	0
2	3	99	1	0	14	1	18	0	86.6	86.9	173	86.75	23.9691	71.737	118	66	122	25	74	114	78	1	0	0	1	0	0	0	1	0	0	0	1	1	2	0	0	0	1	1	2	0	0	0	0	1	1	2	0
2	3	5	0	99	0	2	18	0	87	87.4	167	87.2	22.5508	62.892	117	85	194	30	127	186	79	1	0	1	1	1	0	1	2	0	0	0	1	1	2	0	1	0	1	1	3	1	0	1	0	1	1	3	1
2	1	2	0	99	8	1	18	0	86.4	85.9	178	86.15	21.5932	68.416	136	68	128	37	71	98	99	1	0	0	1	0	0	0	1	0	0	0	1	0	1	0	0	0	1	0	1	0	0	1	0	1	0	2	0
2	2	4	0	99	0	2	18	0	71.7	70.7	162	71.2	19.012	49.895	104	63	134	44	59	156	89	1	0	0	1	1	0	0	2	0	0	0	0	1	1	0	0	0	1	1	2	0	0	0	0	0	1	1	0
2	2	3	0	99	0	1	18	0	79.6	80	180	79.8	20.6676	66.963	110	66	126	32	77	83	82	1	0	0	1	0	0	0	1	0	0	0	1	0	1	0	0	0	1	0	1	0	0	0	0	1	0	1	0
5	3	3	0	99	14	1	18	0	100.9	100.2	174	100.55	30.8934	93.533	135	85	200	39	103	289	100	1	1	1	1	1	1	1	4	1	0	0	1	1	3	1	1	0	1	1	3	1	1	1	0	1	1	4	1
2	1	5	0	99	0	2	18	0	81.3	81.3	162	81.3	22.6029	59.319	116	73	193	46	131	78	89	1	0	1	1	0	0	0	1	0	0	0	0	0	0	0	0	0	1	0	1	0	0	0	0	0	0	0	0
2	3	5	0	99	0	1	18	0	90.6	91.3	180	90.95	24.5657	79.593	139	70	183	43	113	133	92	1	0	0	0	0	0	0	0	0	0	0	0	1	1	0	1	0	1	1	3	1	0	1	0	0	1	2	0
5	3	0	0	99	0	1	18	0	81.3	80.8	170	81.05	21.3073	61.578	123	64	128	41	73	71	86	1	0	0	0	0	0	0	0	0	0	0	0	0	0	0	0	0	1	0	1	0	0	0	0	0	0	0	0
2	3	99	0	99	0	1	18	0	78.3	78.4	169	78.35	19.0844	54.507	109	66	185	51	108	132	106	1	1	0	0	0	0	0	1	0	0	0	0	1	1	0	0	0	0	1	1	0	0	0	0	0	1	1	0
5	1	3	0	99	8	1	18	0	74.9	74.6	176	74.75	18.288	56.649	102	65	138	50	76	61	75	1	0	0	0	0	0	0	0	0	0	0	0	0	0	0	0	0	0	0	0	0	0	0	0	0	0	0	0
2	2	5	0	99	0	1	18	0	80.8	79.9	179	80.35	20.3433	65.182	113	67	153	53	84	82	79	1	0	0	0	0	0	0	0	0	0	0	0	0	0	0	0	0	0	0	0	0	0	0	0	0	0	0	0
2	2	4	0	99	0	1	18	0	77.3	77.8	182	77.55	19.7147	65.303	124	75	137	48	81	42	96	1	0	0	0	0	0	0	0	0	0	0	0	0	0	0	0	0	0	0	0	0	0	0	0	0	0	0	0
2	3	2	0	99	0	2	18	0	86.2	86.5	170	86.35	22.9221	66.245	113	81	166	53	105	42	112	1	1	1	0	0	0	0	1	0	1	0	0	0	1	0	1	1	0	0	2	0	0	1	1	0	0	2	0
2	3	99	0	99	0	1	18	0	92.8	92.3	182	92.55	24.3183	80.552	128	68	148	42	91	73	88	1	0	0	0	0	0	0	0	0	0	0	0	0	0	0	1	0	1	0	2	0	0	0	0	0	0	0	0
2	3	2	0	99	22	2	18	0	70.8	70.8	150	70.8	19.8693	44.706	100	77	204	59	123	112	88	1	0	0	0	0	0	0	0	0	0	0	0	1	1	0	0	0	0	1	1	0	0	0	0	0	1	1	0
2	2	5	0	99	0	2	18	0	75.9	75.6	165	75.75	19.6599	53.524	106	68	121	44	66	56	85	1	0	0	1	0	0	0	1	0	0	0	0	0	0	0	0	0	1	0	1	0	0	0	0	0	0	0	0
2	3	99	1	0	8	1	18	0	86.5	86.6	167	86.55	23.3286	65.061	117	70	137	56	68	65	82	1	0	0	0	0	0	0	0	0	0	0	0	0	0	0	0	0	0	0	0	0	0	0	0	0	0	0	0
4	3	3	0	99	0	2	18	0	78.6	78.3	153	78.45	19.6984	46.112	104	66	166	67	88	56	124	1	1	0	0	0	0	0	1	0	1	0	0	0	1	0	0	1	0	0	1	0	0	0	1	0	0	1	0
9	1	1	0	99	0	2	18	0	86.5	86.5	167	86.5	25.1142	70.041	106	74	153	70	70	64	91	1	0	1	0	0	0	0	0	0	0	0	0	0	0	0	1	0	0	0	1	0	0	0	0	0	0	0	0
2	1	4	0	99	1	2	18	0	71.9	72.3	153	72.1	18.9568	44.376	93	61	141	49	78	71	93	1	0	0	1	0	0	0	1	0	0	0	0	0	0	0	0	0	1	0	1	0	0	0	0	0	0	0	0
2	3	5	0	99	0	2	18	0	103.9	104.6	164	104.25	35.7061	96.035	125	76	163	35	108	101	85	1	0	1	1	0	0	0	1	1	0	0	1	0	2	0	1	0	1	1	3	1	1	0	0	1	0	2	0
9	3	4	0	99	2	1	18	0	76.9	77.9	168	77.4	21.3871	60.363	108	71	133	48	68	86	92	1	0	0	0	0	0	0	0	0	0	0	0	0	0	0	0	0	0	0	0	0	0	0	0	0	0	0	0
2	3	3	0	99	0	1	18	0	82	81	170	81.5	21.8398	63.117	114	70	135	51	62	109	77	1	0	0	0	0	0	0	0	0	0	0	0	0	0	0	0	0	0	1	1	0	0	0	0	0	0	0	0
5	3	3	0	99	0	1	18	0	78.7	79.7	169	79.2	17.3807	49.641	108	71	160	60	86	71	73	1	0	0	0	0	0	0	0	0	0	0	0	0	0	0	0	0	0	0	0	0	0	0	0	0	0	0	0
2	3	1	0	99	2	1	18	0	91.2	91.5	172	91.35	24.493	72.46	109	67	126	45	61	100	80	1	0	0	0	0	0	0	0	0	0	0	0	0	0	0	1	0	0	1	2	0	0	0	0	0	0	0	0
2	3	5	0	99	4	1	18	0	101.8	101.9	176	101.85	30.1617	93.429	125	73	133	29	80	121	91	1	0	1	1	0	0	0	1	1	0	0	1	1	3	1	1	0	1	1	3	1	1	0	0	1	1	3	1
2	3	2	0	99	0	2	18	0	73.7	74	176	73.85	18.9205	58.608	114	62	170	62	95	64	80	1	0	0	0	0	0	0	0	0	0	0	0	0	0	0	0	0	0	0	0	0	0	0	0	0	0	0	0
2	3	99	0	99	0	2	18	0	86.7	86.6	151	86.65	28.7053	65.451	105	68	150	46	92	62	96	1	0	1	1	0	0	0	1	0	0	0	0	0	0	0	1	0	1	0	2	0	0	0	0	0	0	0	0
2	3	3	0	99	0	2	18	0	74.8	75	162	74.9	19.5462	51.297	111	72	157	69	73	77	87	1	0	0	0	0	0	0	0	0	0	0	0	0	0	0	0	0	0	0	0	0	0	0	0	0	0	0	0
4	3	2	0	99	2	1	18	0	82.4	82.4	177	82.4	18.6907	58.556	123	75	164	38	84	208	85	1	0	0	1	1	0	0	2	0	0	0	1	1	2	0	0	0	1	1	2	0	0	0	0	1	1	2	0
2	2	2	1	1	19	1	18	0	81.3	81.8	176	81.55	21.9525	68	124	75	110	53	47	49	75	1	0	0	0	0	0	0	0	0	0	0	0	0	0	0	0	0	0	0	0	0	0	0	0	0	0	0	0
9	1	3	0	99	0	1	18	0	78.2	77.7	172	77.95	22.8093	67.479	130	69	100	27	60	67	83	1	0	0	1	0	0	0	1	0	0	0	1	0	1	0	0	0	1	0	1	0	0	0	0	1	0	1	0
2	3	5	0	99	2	2	18	0	79.7	80.4	165	80.05	20.3798	55.484	102	58	183	69	104	51	78	1	0	1	0	0	0	0	0	0	0	0	0	0	0	0	0	0	0	0	0	0	0	0	0	0	0	0	0
2	3	4	0	99	0	1	18	0	88.4	87.4	164	87.9	25.4012	68.319	124	75	138	48	74	80	132	1	1	0	0	0	0	0	1	0	1	0	0	0	1	0	1	1	0	0	2	0	0	0	1	0	0	1	0
5	1	1	0	99	0	2	18	0	73	73	162	73	21.6278	56.76	103	62	137	45	82	51	72	1	0	0	1	0	0	0	1	0	0	0	0	0	0	0	0	0	1	0	1	0	0	0	0	0	0	0	0
5	2	0	0	99	0	2	18	0	104.9	104.3	168	104.6	36.0364	101.709	115	75	131	64	51	78	89	1	0	1	0	0	0	0	0	1	0	1	0	0	2	0	1	0	0	0	2	0	1	0	0	0	0	1	0
2	3	5	0	99	6	2	18	0	76.8	76.6	163	76.7	23.5718	62.628	115	75	161	41	97	117	78	1	0	0	1	0	0	0	1	0	0	0	0	1	1	0	0	0	1	1	2	0	0	0	0	0	1	1	0
2	1	5	0	99	0	2	18	0	65.7	65.2	151	65.45	17.5957	40.12	118	82	150	53	84	63	93	1	0	0	0	0	0	0	0	0	0	0	0	0	0	0	0	0	0	0	0	0	0	1	0	0	0	1	0
2	3	5	0	99	0	1	18	0	83.2	83.9	158	83.55	24.3495	60.786	121	66	108	44	49	77	82	1	0	0	0	0	0	0	0	0	0	0	0	0	0	0	0	0	1	0	1	0	0	0	0	0	0	0	0
2	1	4	0	99	0	2	18	0	85.1	85.6	161	85.35	22.572	58.509	96	67	158	53	90	73	76	1	0	1	0	0	0	0	0	0	0	0	0	0	0	0	1	0	0	0	1	0	0	0	0	0	0	0	0
2	2	99	0	99	0	2	18	0	76.6	76.5	158	76.55	19.1912	47.909	100	69	158	46	98	72	96	1	0	0	1	0	0	0	1	0	0	0	0	0	0	0	0	0	1	0	1	0	0	0	0	0	0	0	0
9	2	2	0	99	2	2	18	0	68.8	69.3	161	69.05	19.5594	50.7	102	63	194	67	112	73	107	1	1	0	0	0	0	0	1	0	0	0	0	0	0	0	0	0	0	0	0	0	0	0	0	0	0	0	0
2	3	99	0	99	4	1	19	0	78.7	78.5	168	78.6	21.2358	59.936	127	74	123	45	60	90	92	2	0	0	0	0	0	0	0	0	0	0	0	0	0	0	0	0	0	0	0	0	0	0	0	0	0	0	0
2	1	3	0	99	3	1	18	0	75.2	75.1	176	75.15	17.5261	54.289	106	59	148	56	77	73	111	1	1	0	0	0	0	0	1	0	1	0	0	0	1	0	0	1	0	0	1	0	0	0	1	0	0	1	0
2	3	5	0	99	4	2	18	0	84.7	84.9	166	84.8	19.9485	54.97	107	73	154	52	84	92	90	1	0	1	0	0	0	0	0	0	0	0	0	0	0	0	1	0	0	0	1	0	0	0	0	0	0	0	0
2	3	4	0	99	0	1	18	0	88.3	87.9	175	88.1	22.5443	69.042	114	76	150	59	81	48	87	1	0	0	0	0	0	0	0	0	0	0	0	0	0	0	1	0	0	0	1	0	0	0	0	0	0	0	0
2	3	2	0	99	0	1	18	0	74.5	75.3	176	74.9	18.6264	57.697	120	66	115	50	53	58	84	1	0	0	0	0	0	0	0	0	0	0	0	0	0	0	0	0	0	0	0	0	0	0	0	0	0	0	0
2	3	4	0	99	2	2	18	0	75.1	74.4	163	74.75	18.3865	48.851	115	90	174	45	112	85	96	1	0	0	1	0	0	0	1	0	0	0	0	0	0	0	0	0	1	0	1	0	0	1	0	0	0	1	0
2	3	4	0	99	0	2	18	0	82.9	82.8	151	82.85	24.6511	56.207	116	80	150	48	88	68	85	1	0	1	1	0	0	0	1	0	0	0	0	0	0	0	0	0	1	0	1	0	0	1	0	0	0	1	0
2	3	3	0	99	0	1	18	0	88.5	88.6	176	88.55	21.158	65.539	117	66	142	35	86	104	91	1	0	0	1	0	0	0	1	0	0	0	1	0	1	0	1	0	1	1	3	1	0	0	0	1	0	1	0
4	3	3	0	99	0	2	18	0	71.7	71	155	71.35	18.8799	45.359	99	61	93	48	36	43	84	1	0	0	1	0	0	0	1	0	0	0	0	0	0	0	0	0	1	0	1	0	0	0	0	0	0	0	0
2	3	5	0	99	2	1	18	0	78.1	78	176	78.05	20.0507	62.109	119	73	154	42	93	96	100	1	1	0	0	0	0	0	1	0	0	0	0	0	0	0	0	0	1	0	1	0	0	0	0	0	0	0	0
2	3	5	0	99	0	2	18	0	82.3	82.2	164	82.25	22.4041	60.258	119	80	215	43	127	226	100	1	1	1	1	1	0	1	3	0	0	0	0	1	1	0	0	0	1	1	2	0	0	1	0	0	1	2	0
4	3	5	0	99	0	2	18	0	94.6	94.7	155	94.65	28.9328	69.511	112	81	180	32	100	240	78	1	0	1	1	1	0	1	2	1	0	0	1	1	3	1	1	0	1	1	3	1	1	1	0	1	1	4	1
10	1	4	0	99	7	2	18	0	84.6	84.5	171	84.55	24.3576	71.224	115	71	137	52	75	48	86	1	0	1	0	0	0	0	0	0	0	0	0	0	0	0	1	0	0	0	1	0	0	0	0	0	0	0	0
2	2	99	0	99	0	2	18	0	93.8	93.8	170	93.8	26.7422	77.285	131	76	151	43	96	59	94	1	0	1	1	0	0	0	1	1	0	0	0	0	1	0	1	0	1	0	2	0	1	1	0	0	0	2	0
2	2	3	0	99	0	2	18	0	79.2	79.4	170	79.3	17.1339	49.517	96	73	132	39	77	79	79	1	0	0	1	0	0	0	1	0	0	0	1	0	1	0	0	0	1	0	1	0	0	0	0	1	0	1	0
5	3	5	0	99	3	2	18	0	80.1	80.2	159	80.15	21.5071	54.372	105	71	143	48	83	60	88	1	0	1	1	0	0	0	1	0	0	0	0	0	0	0	0	0	1	0	1	0	0	0	0	0	0	0	0
2	3	3	0	99	19	2	18	0	78.9	79.5	163	79.2	20.6429	54.846	115	80	148	50	80	91	76	1	0	0	0	0	0	0	0	0	0	0	0	0	0	0	0	0	0	0	0	0	0	1	0	0	0	1	0
2	1	4	0	99	0	1	18	0	75	75	161	75	18.213	47.21	117	75	158	43	99	82	84	1	0	0	0	0	0	0	0	0	0	0	0	0	0	0	0	0	1	0	1	0	0	0	0	0	0	0	0
2	3	3	0	99	4	2	18	0	74	73.4	157	73.7	18.9671	46.752	102	72	152	42	93	85	93	1	0	0	1	0	0	0	1	0	0	0	0	0	0	0	0	0	1	0	1	0	0	0	0	0	0	0	0
2	1	2	0	99	6	1	18	0	92.3	91.9	187	92.1	23.2881	81.436	122	67	121	35	70	81	108	1	1	0	1	0	0	0	2	0	0	0	1	0	1	0	1	0	1	0	2	0	0	0	0	1	0	1	0
2	2	5	1	1	2	1	18	0	78.2	78.4	175	78.3	20.1362	61.667	137	85	146	39	86	106	80	1	0	0	1	0	1	0	2	0	0	1	1	0	2	0	0	0	1	1	3	1	0	1	0	1	0	2	0
2	3	99	0	99	0	1	18	0	76.9	77.2	174	77.05	18.2722	55.321	119	80	114	37	66	56	80	1	0	0	1	0	0	0	1	0	0	0	1	0	1	0	0	0	1	0	1	0	0	1	0	1	0	2	0
2	3	5	0	99	0	2	18	0	77	76.9	151	76.95	18.8601	43.003	102	67	136	42	82	59	82	1	0	0	1	0	0	0	1	0	0	0	0	0	0	0	0	0	1	0	1	0	0	0	0	0	0	0	0
4	1	4	0	99	0	1	18	0	80.9	80.4	174	80.65	19.1964	58.119	110	65	155	50	90	77	84	1	0	0	0	0	0	0	0	0	0	0	0	0	0	0	0	0	0	0	0	0	0	0	0	0	0	0	0
2	3	3	0	99	14	1	18	0	77.1	76.4	184	76.75	19.1795	64.934	136	83	120	36	63	106	85	1	0	0	1	0	0	0	1	0	0	1	1	0	2	0	0	0	1	1	3	1	0	1	0	1	0	2	0
2	3	5	0	99	0	1	18	0	72.8	73	172	72.9	19.6843	58.234	132	82	152	43	81	142	91	1	0	0	0	0	0	0	0	0	0	1	0	1	2	0	0	0	1	1	3	1	0	1	0	0	1	2	0
4	3	5	0	99	0	2	18	0	81.3	81.2	156	81.25	21.199	51.59	103	64	163	46	98	93	84	1	0	1	1	0	0	0	1	0	0	0	0	0	0	0	0	0	1	0	1	0	0	0	0	0	0	0	0
2	3	5	0	99	0	1	18	0	70.2	69.9	170	70.05	17.826	51.517	132	85	149	43	85	104	109	1	1	0	0	0	1	0	2	0	0	1	0	0	1	0	0	0	1	1	3	1	0	1	0	0	0	1	0
5	3	5	0	99	4	2	18	0	92.9	92.8	157	92.85	29.1789	71.923	115	74	217	94	102	105	110	1	1	1	0	0	0	0	1	1	1	0	0	0	2	0	1	1	0	1	3	1	1	0	1	0	0	2	0
2	2	5	0	99	6	2	18	0	76.7	77.5	159	77.1	21.0344	53.177	101	75	233	59	150	118	72	1	0	0	0	0	0	0	0	0	0	0	0	1	1	0	0	0	0	1	1	0	0	0	0	0	1	1	0
2	3	2	0	99	0	2	18	0	93.4	93.1	167	93.25	23.4609	65.43	114	72	158	51	86	106	98	1	0	1	0	0	0	0	0	1	0	0	0	0	1	0	1	0	0	1	2	0	1	0	0	0	0	1	0
2	1	2	0	99	2	1	18	0	76.5	76.8	164	76.65	20.1811	54.279	115	76	174	58	102	71	103	1	1	0	0	0	0	0	1	0	0	0	0	0	0	0	0	0	0	0	0	0	0	0	0	0	0	0	0
2	1	2	0	99	0	2	18	0	83.3	82.3	146	82.8	20.0962	42.837	105	70	181	58	110	67	86	1	0	1	0	0	0	0	0	0	0	0	0	0	0	0	0	0	0	0	0	0	0	0	0	0	0	0	0
2	3	4	0	99	0	1	18	0	80	79.4	161	79.7	21.8201	56.56	118	72	180	51	104	124	82	1	0	0	0	0	0	0	0	0	0	0	0	1	1	0	0	0	0	1	1	0	0	0	0	0	1	1	0
4	1	3	0	99	9	1	19	0	72.7	73.7	174	73.2	18.8083	56.944	114	71	134	53	62	94	99	2	0	0	0	0	0	0	0	0	0	0	0	0	0	0	0	0	0	0	0	0	0	0	0	0	0	0	0
2	3	99	1	0	4	1	18	0	76.9	76	178	76.45	18.7416	59.381	122	79	135	36	82	85	94	1	0	0	1	0	0	0	1	0	0	0	1	0	1	0	0	0	1	0	1	0	0	0	0	1	0	1	0
2	3	5	0	99	0	1	18	0	89.6	89.3	176	89.45	23.3313	72.271	126	74	159	38	100	105	103	1	1	0	1	0	0	0	2	0	0	0	1	0	1	0	1	0	1	1	3	1	0	0	0	1	0	1	0
2	3	3	0	99	0	1	18	0	94.5	93.8	189	94.15	24.9419	89.095	139	85	141	69	59	66	87	1	0	1	0	0	1	0	1	0	0	1	0	0	1	0	1	0	0	0	2	0	0	1	0	0	0	1	0
2	3	5	0	99	2	2	18	0	67.1	67.5	163	67.3	16.3503	43.441	114	79	131	57	63	56	94	1	0	0	0	0	0	0	0	0	0	0	0	0	0	0	0	0	0	0	0	0	0	0	0	0	0	0	0
4	3	3	0	99	0	1	18	0	78.3	78	162	78.15	20.5045	53.812	138	89	166	45	98	117	108	1	1	0	0	0	1	0	2	0	0	1	0	1	2	0	0	0	0	1	2	0	0	1	0	0	1	2	0
2	2	3	0	99	0	1	18	0	73.6	73	171	73.3	17.7019	51.762	106	61	145	49	84	61	90	1	0	0	0	0	0	0	0	0	0	0	0	0	0	0	0	0	0	0	0	0	0	0	0	0	0	0	0
2	3	99	0	99	0	1	18	0	88.4	87.7	163	88.05	24.4145	64.867	121	73	171	57	94	99	90	1	0	0	0	0	0	0	0	0	0	0	0	0	0	0	1	0	0	0	1	0	0	0	0	0	0	0	0
2	1	3	0	99	2	1	18	0	85.9	86.9	185	86.4	20.8748	71.444	138	76	216	41	152	116	79	1	0	0	0	0	0	0	0	0	0	0	0	1	1	0	0	0	1	1	2	0	0	1	0	0	1	2	0
5	3	1	0	99	11	1	18	0	70.3	70.6	166	70.45	17.4917	48.2	124	72	125	57	58	51	90	1	0	0	0	0	0	0	0	0	0	0	0	0	0	0	0	0	0	0	0	0	0	0	0	0	0	0	0
2	3	99	0	99	0	1	18	0	79	79.3	171	79.15	20.7678	60.727	129	75	139	59	65	75	86	1	0	0	0	0	0	0	0	0	0	0	0	0	0	0	0	0	0	0	0	0	0	0	0	0	0	0	0
2	3	3	0	99	0	2	18	0	70.7	69.7	160	70.2	18.1598	46.489	111	64	174	64	99	53	100	1	1	0	0	0	0	0	1	0	0	0	0	0	0	0	0	0	0	0	0	0	0	0	0	0	0	0	0
2	3	4	1	0	7	1	18	0	79	78.8	171	78.9	20.3222	59.424	101	67	95	34	42	97	111	1	1	0	1	0	0	0	2	0	1	0	1	0	2	0	0	1	1	0	2	0	0	0	1	1	0	2	0
5	3	2	0	99	0	1	18	0	88.4	87.7	174	88.05	24.5931	74.458	127	75	147	27	89	156	90	1	0	0	1	1	0	0	2	0	0	0	1	1	2	0	1	0	1	1	3	1	0	0	0	1	1	2	0
2	1	5	0	99	0	2	18	0	79.7	79.7	164	79.7	18.5407	49.867	103	69	144	44	80	100	87	1	0	0	1	0	0	0	1	0	0	0	0	0	0	0	0	0	1	1	2	0	0	0	0	0	0	0	0
5	1	2	0	99	18	1	18	0	91.2	91.5	185	91.35	21.754	74.453	123	82	135	40	78	87	95	1	0	0	0	0	0	0	0	0	0	0	1	0	1	0	1	0	1	0	2	0	0	1	0	1	0	2	0
2	3	4	0	99	0	1	18	0	87.5	87.6	166	87.55	22.9231	63.167	127	66	213	49	144	102	111	1	1	0	0	0	0	0	1	0	1	0	0	0	1	0	0	1	0	1	2	0	0	0	1	0	0	1	0
2	3	99	0	99	3	1	18	0	79.1	80	179	79.55	17.8153	57.082	120	72	179	46	96	183	121	1	1	0	0	1	0	0	2	0	1	0	0	1	2	0	0	1	0	1	2	0	0	0	1	0	1	2	0
2	3	5	0	99	3	1	19	0	81.2	81.4	182	81.3	20.0628	66.456	139	79	194	47	131	79	86	2	0	0	0	0	0	0	0	0	0	0	0	0	0	0	0	0	0	0	0	0	0	1	0	0	0	1	0
2	3	2	0	99	21	1	18	0	118.5	118.2	175	118.35	21.7773	66.693	150	91	168	43	105	101	91	1	0	1	0	0	1	0	1	1	0	1	0	0	2	0	1	0	1	1	4	1	1	1	0	0	0	2	0
2	3	4	0	99	0	1	18	0	78.7	78.3	176	78.5	22.2259	68.847	134	71	149	53	68	139	87	1	0	0	0	0	0	0	0	0	0	0	0	1	1	0	0	0	0	1	1	0	0	1	0	0	1	2	0
2	2	99	0	99	9	2	18	0	99.5	98.5	155	99	32.7217	78.614	110	71	176	53	107	78	90	1	0	1	0	0	0	0	0	1	0	0	0	0	1	0	1	0	0	0	1	0	1	0	0	0	0	1	0
2	1	1	0	99	17	1	18	0	70.3	69.8	164	70.05	17.4405	46.908	115	68	150	46	82	108	91	1	0	0	0	0	0	0	0	0	0	0	0	0	0	0	0	0	0	1	1	0	0	0	0	0	0	0	0
2	2	4	0	99	0	1	18	0	82.8	82.1	178	82.45	22.6411	71.736	143	76	165	44	105	81	86	1	0	0	0	0	0	0	0	0	0	0	0	0	0	0	0	0	1	0	1	0	0	1	0	0	0	1	0
2	3	5	0	99	0	1	18	0	76.9	77.7	179	77.3	19.0696	61.101	118	70	160	42	105	67	89	1	0	0	0	0	0	0	0	0	0	0	0	0	0	0	0	0	1	0	1	0	0	0	0	0	0	0	0
2	3	4	0	99	1	2	18	0	74.9	74.7	172	74.8	18.0919	53.523	111	70	168	68	88	60	81	1	0	0	0	0	0	0	0	0	0	0	0	0	0	0	0	0	0	0	0	0	0	0	0	0	0	0	0
2	3	99	0	99	0	2	18	0	75.6	75.9	160	75.75	17.5605	44.955	123	78	126	44	71	57	94	1	0	0	1	0	0	0	1	0	0	0	0	0	0	0	0	0	1	0	1	0	0	0	0	0	0	0	0
2	3	5	0	99	0	2	18	0	76.7	75.9	166	76.3	17.7402	48.885	117	76	134	37	80	85	91	1	0	0	1	0	0	0	1	0	0	0	1	0	1	0	0	0	1	0	1	0	0	0	0	1	0	1	0
5	1	1	0	99	14	1	18	0	87.4	87.6	175	87.5	22.7056	69.536	133	76	157	52	89	82	86	1	0	0	0	0	0	0	0	0	0	0	0	0	0	0	0	0	0	0	0	0	0	1	0	0	0	1	0
2	1	4	0	99	0	2	18	0	71.6	71.3	153	71.45	18.4583	43.209	110	77	180	43	123	72	139	1	1	0	1	0	0	0	2	0	1	0	0	0	1	0	0	1	1	0	2	0	0	0	1	0	0	1	0
2	1	4	0	99	1	1	18	0	79.7	79.4	175	79.55	19.618	60.08	113	67	150	41	88	106	84	1	0	0	0	0	0	0	0	0	0	0	0	0	0	0	0	0	1	1	2	0	0	0	0	0	0	0	0
4	1	3	0	99	0	2	18	0	87.5	87.6	159	87.55	26.2956	66.478	106	68	201	47	138	78	90	1	0	1	1	0	0	0	1	0	0	0	0	0	0	0	1	0	1	0	2	0	0	0	0	0	0	0	0
4	3	4	0	99	0	2	18	0	79.7	80.2	166	79.95	19.9376	54.94	105	58	106	44	46	81	88	1	0	0	1	0	0	0	1	0	0	0	0	0	0	0	0	0	1	0	1	0	0	0	0	0	0	0	0
9	3	3	0	99	0	1	18	0	92.5	92.6	180	92.55	25.817	83.647	121	77	138	32	75	157	111	1	1	0	1	1	0	0	3	0	1	0	1	1	3	1	1	1	1	1	4	1	0	0	1	1	1	3	1
2	3	4	0	99	0	1	18	0	89.7	90.5	185	90.1	22.5017	77.012	126	78	182	57	105	102	91	1	0	0	0	0	0	0	0	0	0	0	0	0	0	0	1	0	0	1	2	0	0	0	0	0	0	0	0
2	2	5	0	99	0	1	18	0	75.2	75.3	159	75.25	22.2586	56.272	115	69	133	35	81	86	79	1	0	0	1	0	0	0	1	0	0	0	1	0	1	0	0	0	1	0	1	0	0	0	0	1	0	1	0
10	3	4	0	99	0	2	19	0	80.6	79.9	160	80.25	23.0309	58.959	100	70	161	61	89	57	94	2	0	1	0	0	0	0	0	0	0	0	0	0	0	0	0	0	0	0	0	0	0	0	0	0	0	0	0
1	2	3	0	99	0	2	19	0	69.2	69.8	171	69.5	15.8244	46.272	101	73	195	64	121	51	79	2	0	0	0	0	0	0	0	0	0	0	0	0	0	0	0	0	0	0	0	0	0	0	0	0	0	0	0
5	2	4	0	99	0	1	18	0	104.5	103.5	168	104	29.9699	84.587	117	81	182	34	128	98	92	1	0	1	1	0	0	0	1	1	0	0	1	0	2	0	1	0	1	0	2	0	1	1	0	1	0	3	1
2	2	4	0	99	5	1	18	0	79.7	79.4	177	79.55	21.5449	67.498	122	63	160	38	106	82	102	1	1	0	1	0	0	0	2	0	0	0	1	0	1	0	0	0	1	0	1	0	0	0	0	1	0	1	0
2	3	5	0	99	0	1	19	0	78	77.7	175.5	77.85	18.6015	57.293	137	93	173	52	98	114	95	2	0	0	0	0	1	0	1	0	0	0	0	1	1	0	0	0	0	1	1	0	0	1	0	0	1	2	0
4	3	5	0	99	0	1	18	0	73.3	74.1	165	73.7	17.0803	46.501	106	69	161	44	98	94	103	1	1	0	0	0	0	0	1	0	0	0	0	0	0	0	0	0	1	0	1	0	0	0	0	0	0	0	0
2	3	5	0	99	0	2	18	0	74.3	74.8	159	74.55	19.0756	48.225	113	70	156	43	98	77	90	1	0	0	1	0	0	0	1	0	0	0	0	0	0	0	0	0	1	0	1	0	0	0	0	0	0	0	0
2	3	5	0	99	0	1	19	0	73.7	73.1	165	73.4	17.4075	47.392	115	71	134	49	78	34	83	2	0	0	0	0	0	0	0	0	0	0	0	0	0	0	0	0	0	0	0	0	0	0	0	0	0	0	0
2	2	4	0	99	4	2	18	0	78.6	78.7	158	78.65	20.9113	52.203	103	76	119	51	54	69	91	1	0	0	0	0	0	0	0	0	0	0	0	0	0	0	0	0	0	0	0	0	0	0	0	0	0	0	0
2	2	2	0	99	0	1	18	0	79.3	80	185	79.65	19.0001	65.028	119	63	145	41	82	109	100	1	1	0	0	0	0	0	1	0	0	0	0	0	0	0	0	0	1	1	2	0	0	0	0	0	0	0	0
2	3	3	0	99	0	1	18	0	86.6	86.4	182	86.5	20.0051	66.265	109	63	123	23	78	108	94	1	0	0	1	0	0	0	1	0	0	0	1	0	1	0	0	0	1	1	2	0	0	0	0	1	0	1	0
2	3	5	0	99	0	1	18	0	80	80.6	172	80.3	19.3527	57.253	130	83	146	39	90	87	99	1	0	0	1	0	0	0	1	0	0	0	1	0	1	0	0	0	1	0	1	0	0	1	0	1	0	2	0
2	3	4	0	99	0	2	18	0	72.9	73.4	152	73.15	20.8431	48.156	107	69	164	63	86	74	84	1	0	0	0	0	0	0	0	0	0	0	0	0	0	0	0	0	0	0	0	0	0	0	0	0	0	0	0
2	3	4	0	99	0	1	18	0	81.3	80.7	180	81	19.4123	62.896	114	68	165	41	114	48	80	1	0	0	0	0	0	0	0	0	0	0	0	0	0	0	0	0	1	0	1	0	0	0	0	0	0	0	0
2	3	5	0	99	0	2	18	0	81.6	81	158	81.3	23.9829	59.871	96	61	178	67	100	56	93	1	0	1	0	0	0	0	0	0	0	0	0	0	0	0	0	0	0	0	0	0	0	0	0	0	0	0	0
2	2	99	0	99	0	1	18	0	79.1	78.4	174	78.75	18.9345	57.326	107	65	154	69	74	56	94	1	0	0	0	0	0	0	0	0	0	0	0	0	0	0	0	0	0	0	0	0	0	0	0	0	0	0	0
2	2	4	1	0	6	1	18	0	81.6	82.2	168	81.9	20.968	59.18	125	65	139	59	63	84	111	1	1	0	0	0	0	0	1	0	1	0	0	0	1	0	0	1	0	0	1	0	0	0	1	0	0	1	0
2	3	3	0	99	2	2	18	0	82.2	83.1	164	82.65	21.7702	58.553	102	65	151	43	90	92	81	1	0	1	1	0	0	0	1	0	0	0	0	0	0	0	0	0	1	0	1	0	0	0	0	0	0	0	0
2	2	2	0	99	13	1	18	0	78.8	78.3	175	78.55	21.3296	65.322	115	70	170	47	107	78	93	1	0	0	0	0	0	0	0	0	0	0	0	0	0	0	0	0	0	0	0	0	0	0	0	0	0	0	0
5	3	3	0	99	10	2	18	0	85.3	86	164	85.65	24.4304	65.708	110	67	150	41	93	82	77	1	0	1	1	0	0	0	1	0	0	0	0	0	0	0	1	0	1	0	2	0	0	0	0	0	0	0	0
2	3	4	0	99	0	1	18	0	73.3	74	173	73.65	19.0394	56.983	131	71	181	50	120	56	94	1	0	0	0	0	0	0	0	0	0	0	0	0	0	0	0	0	0	0	0	0	0	1	0	0	0	1	0
2	1	2	0	99	0	2	18	0	97.5	97.8	161	97.65	29.1	75.43	120	87	209	52	129	141	93	1	0	1	0	0	0	0	0	1	0	1	0	1	3	1	1	0	0	1	3	1	1	1	0	0	1	3	1
5	1	4	0	99	0	2	18	0	78.4	79.2	168	78.8	20.344	57.419	109	67	180	65	105	51	91	1	0	0	0	0	0	0	0	0	0	0	0	0	0	0	0	0	0	0	0	0	0	0	0	0	0	0	0
4	2	5	1	1	24	2	18	0	78.2	77.2	165	77.7	21.2856	57.95	97	59	195	55	117	115	89	1	0	0	0	0	0	0	0	0	0	0	0	1	1	0	0	0	0	1	1	0	0	0	0	0	1	1	0
2	3	5	0	99	0	2	18	0	78	78.7	154	78.35	19.3203	45.82	103	73	121	33	68	100	93	1	0	0	1	0	0	0	1	0	0	0	1	0	1	0	0	0	1	1	2	0	0	0	0	1	0	1	0
9	3	1	0	99	0	2	18	0	84	84.5	150	84.25	20.6938	46.561	119	78	161	42	105	70	92	1	0	1	1	0	0	0	1	0	0	0	0	0	0	0	0	0	1	0	1	0	0	0	0	0	0	0	0
2	3	5	0	99	4	1	18	0	81.6	80.8	177	81.2	19.4663	60.986	136	90	141	74	52	75	89	1	0	0	0	0	1	0	1	0	0	1	0	0	1	0	0	0	0	0	1	0	0	1	0	0	0	1	0
2	3	5	0	99	0	2	18	0	78.7	78.6	159	78.65	19.5416	49.403	101	67	187	56	117	69	95	1	0	0	0	0	0	0	0	0	0	0	0	0	0	0	0	0	0	0	0	0	0	0	0	0	0	0	0
5	3	4	0	99	0	2	18	0	76.7	76.7	162	76.7	18.7799	49.286	108	70	151	50	90	55	103	1	1	0	0	0	0	0	1	0	0	0	0	0	0	0	0	0	0	0	0	0	0	0	0	0	0	0	0
5	2	2	0	99	0	2	18	0	102.7	103.3	154	103	39.3186	93.248	115	72	151	57	80	72	81	1	0	1	0	0	0	0	0	1	0	0	0	0	1	0	1	0	0	0	1	0	1	0	0	0	0	1	0
2	1	4	0	99	0	2	18	0	73	73.7	158	73.35	19.0627	47.588	106	69	157	68	75	70	91	1	0	0	0	0	0	0	0	0	0	0	0	0	0	0	0	0	0	0	0	0	0	0	0	0	0	0	0
5	3	3	0	99	9	1	18	0	87.3	86.6	170	86.95	24.8907	71.934	117	71	150	45	78	133	88	1	0	0	0	0	0	0	0	0	0	0	0	1	1	0	0	0	0	1	1	0	0	0	0	0	1	1	0
2	3	4	0	99	0	2	18	0	75.9	76.3	164	76.1	18.0391	48.518	94	57	135	46	78	56	92	1	0	0	1	0	0	0	1	0	0	0	0	0	0	0	0	0	1	0	1	0	0	0	0	0	0	0	0
2	3	2	0	99	0	2	18	0	70.3	70.6	166	70.45	17.7729	48.975	104	66	186	65	104	84	83	1	0	0	0	0	0	0	0	0	0	0	0	0	0	0	0	0	0	0	0	0	0	0	0	0	0	0	0
2	3	4	0	99	0	2	18	0	84	83.6	161	83.8	26.6417	69.058	113	77	190	62	112	79	113	1	1	1	0	0	0	0	1	0	1	0	0	0	1	0	0	1	0	0	1	0	0	0	1	0	0	1	0
2	3	5	0	99	8	1	18	0	91.3	91.1	175	91.2	25.2036	77.186	134	83	197	37	133	135	93	1	0	0	1	0	0	0	1	0	0	0	1	1	2	0	1	0	1	1	3	1	0	1	0	1	1	3	1
2	3	5	0	99	0	2	18	0	79	79.5	156	79.25	22.1351	53.868	117	75	112	49	51	59	83	1	0	0	1	0	0	0	1	0	0	0	0	0	0	0	0	0	1	0	1	0	0	0	0	0	0	0	0
2	3	3	0	99	7	1	18	0	76.3	75.3	160	75.8	20.1895	51.685	95	63	139	39	88	58	97	1	0	0	1	0	0	0	1	0	0	0	1	0	1	0	0	0	1	0	1	0	0	0	0	1	0	1	0
5	3	5	0	99	11	1	18	0	67.4	67.9	165	67.65	17.6051	47.93	113	71	141	56	63	109	85	1	0	0	0	0	0	0	0	0	0	0	0	0	0	0	0	0	0	1	1	0	0	0	0	0	0	0	0
2	2	3	0	99	0	1	18	0	99.1	98.9	168	99	30.3036	85.529	120	77	157	33	102	112	83	1	0	1	1	0	0	0	1	1	0	0	1	1	3	1	1	0	1	1	3	1	1	0	0	1	1	3	1
5	3	3	0	99	1	1	18	0	85.8	85	178	85.4	20.2907	64.289	121	71	108	48	54	40	69	1	0	0	0	0	0	0	0	0	0	0	0	0	0	0	0	0	0	0	0	0	0	0	0	0	0	0	0
5	3	4	0	99	0	1	18	0	87	86.9	186	86.95	22.2786	77.075	130	69	161	49	99	64	91	1	0	0	0	0	0	0	0	0	0	0	0	0	0	0	0	0	0	0	0	0	0	0	0	0	0	0	0
5	2	3	0	99	0	2	19	0	71.9	71.8	176	71.85	16.2852	50.445	88	59	139	55	64	100	83	2	0	0	0	0	0	0	0	0	0	0	0	0	0	0	0	0	0	1	1	0	0	0	0	0	0	0	0
2	3	99	0	99	14	2	18	0	80.3	79.6	163	79.95	22.9587	60.999	104	69	183	62	110	57	94	1	0	0	0	0	0	0	0	0	0	0	0	0	0	0	0	0	0	0	0	0	0	0	0	0	0	0	0
2	3	4	0	99	0	1	18	0	85.1	85	170	85.05	23.5266	67.992	162	90	115	38	49	138	77	1	0	0	1	0	1	0	2	0	0	1	1	1	3	1	0	0	1	1	3	1	0	1	0	1	1	3	1
5	3	4	0	99	0	2	18	0	72.1	72.8	161	72.45	20.3314	52.701	105	67	170	43	112	75	86	1	0	0	1	0	0	0	1	0	0	0	0	0	0	0	0	0	1	0	1	0	0	0	0	0	0	0	0
2	2	3	0	99	11	1	18	0	76.2	75.9	171	76.05	20.935	61.216	118	64	118	41	65	59	89	1	0	0	0	0	0	0	0	0	0	0	0	0	0	0	0	0	1	0	1	0	0	0	0	0	0	0	0
2	3	4	0	99	0	2	18	0	87	87.4	163	87.2	26.2919	69.855	106	75	245	72	144	143	84	1	0	1	0	0	0	0	0	0	0	0	0	1	1	0	1	0	0	1	2	0	0	0	0	0	1	1	0
2	1	2	0	99	8	2	18	0	81.1	81.3	159	81.2	22.95	58.02	97	62	130	54	59	84	79	1	0	1	0	0	0	0	0	0	0	0	0	0	0	0	0	0	0	0	0	0	0	0	0	0	0	0	0
4	3	3	0	99	7	1	18	0	72.5	72.5	173	72.5	18.6214	55.732	117	67	106	35	53	92	98	1	0	0	1	0	0	0	1	0	0	0	1	0	1	0	0	0	1	0	1	0	0	0	0	1	0	1	0
2	3	2	0	99	0	2	18	0	77.6	78.5	169	78.05	22.1652	63.306	108	66	136	56	71	45	97	1	0	0	0	0	0	0	0	0	0	0	0	0	0	0	0	0	0	0	0	0	0	0	0	0	0	0	0
2	3	4	0	99	9	1	18	0	79	79.2	181	79.1	20.4225	66.906	133	73	148	52	86	51	91	1	0	0	0	0	0	0	0	0	0	0	0	0	0	0	0	0	0	0	0	0	0	1	0	0	0	1	0
1	3	2	0	99	0	1	18	0	80.6	80.9	161	80.75	25.0696	64.983	126	86	211	41	149	105	356	1	1	0	0	0	0	0	1	0	1	0	0	0	1	0	0	1	1	1	3	1	0	1	1	0	0	2	0
5	3	4	0	99	14	2	18	0	71.1	70.3	156	70.7	17.1935	41.842	102	73	181	62	103	79	98	1	0	0	0	0	0	0	0	0	0	0	0	0	0	0	0	0	0	0	0	0	0	0	0	0	0	0	0
2	3	99	0	99	9	2	18	0	73.1	74	161	73.55	19.3615	50.187	103	68	190	36	142	61	86	1	0	0	1	0	0	0	1	0	0	0	1	0	1	0	0	0	1	0	1	0	0	0	0	1	0	1	0
5	3	5	0	99	0	2	18	0	101.1	101.3	156	101.2	31.2459	76.04	127	72	223	45	157	107	95	1	0	1	1	0	0	0	1	1	0	0	0	0	1	0	1	0	1	1	3	1	1	0	0	0	0	1	0
2	3	4	0	99	0	1	18	0	77.9	78.2	172	78.05	19.1742	56.725	113	73	146	47	78	103	99	1	0	0	0	0	0	0	0	0	0	0	0	0	0	0	0	0	0	1	1	0	0	0	0	0	0	0	0
2	2	4	0	99	12	2	18	0	75.1	75.3	170	75.2	20.8322	60.205	106	67	125	65	52	40	89	1	0	0	0	0	0	0	0	0	0	0	0	0	0	0	0	0	0	0	0	0	0	0	0	0	0	0	0
2	3	3	0	99	22	2	18	0	68.9	69.6	163	69.25	16.9144	44.94	102	66	184	70	98	80	106	1	1	0	0	0	0	0	1	0	0	0	0	0	0	0	0	0	0	0	0	0	0	0	0	0	0	0	0
5	3	99	0	99	9	1	18	0	88.3	88.5	169	88.4	25.17	71.888	133	74	142	51	73	88	97	1	0	0	0	0	0	0	0	0	0	0	0	0	0	0	1	0	0	0	1	0	0	1	0	0	0	1	0
2	3	3	0	99	5	1	18	0	79.8	80.6	167	80.2	20.2847	56.572	120	77	167	61	83	114	80	1	0	0	0	0	0	0	0	0	0	0	0	1	1	0	0	0	0	1	1	0	0	0	0	0	1	1	0
9	3	1	0	99	0	2	18	0	87.2	87.7	174	87.45	22.8319	69.126	109	66	157	41	95	103	115	1	1	1	1	0	0	1	2	0	1	0	0	0	1	0	1	1	1	1	4	1	0	0	1	0	0	1	0
5	1	2	0	99	0	2	18	0	71.8	70.8	170	71.3	18.9394	54.735	113	71	183	77	90	79	86	1	0	0	0	0	0	0	0	0	0	0	0	0	0	0	0	0	0	0	0	0	0	0	0	0	0	0	0
5	3	4	0	99	0	2	18	0	72.8	73.1	162	72.95	18.8211	49.394	100	64	183	59	109	74	115	1	1	0	0	0	0	0	1	0	1	0	0	0	1	0	0	1	0	0	1	0	0	0	1	0	0	1	0
5	3	2	0	99	0	1	18	0	81.9	82.8	173	82.35	22.1307	66.235	113	64	160	53	94	63	92	1	0	0	0	0	0	0	0	0	0	0	0	0	0	0	0	0	0	0	0	0	0	0	0	0	0	0	0
5	3	2	0	99	0	2	18	0	81.2	80.4	167	80.8	21.3342	59.499	103	66	147	39	95	64	89	1	0	1	1	0	0	0	1	0	0	0	1	0	1	0	0	0	1	0	1	0	0	0	0	1	0	1	0
9	1	3	0	99	0	1	18	0	88.1	88.7	170	88.4	23.5183	67.968	125	77	163	44	106	64	113	1	1	0	0	0	0	0	1	0	1	0	0	0	1	0	1	1	1	0	3	1	0	0	1	0	0	1	0
5	1	0	0	99	5	2	18	0	84.6	84.6	160	84.6	25.8691	66.225	106	77	208	60	126	109	88	1	0	1	0	0	0	0	0	0	0	0	0	0	0	0	1	0	0	1	2	0	0	0	0	0	0	0	0
5	3	1	0	99	0	1	18	0	92.8	92.1	185	92.45	26.7468	91.541	130	72	111	35	63	65	94	1	0	0	1	0	0	0	1	0	0	0	1	0	1	0	1	0	1	0	2	0	0	0	0	1	0	1	0
5	3	2	0	99	0	2	19	0	81.1	82	151	81.55	23.6169	53.849	111	72	162	43	90	145	82	2	0	1	1	0	0	0	1	0	0	0	0	1	1	0	0	0	1	1	2	0	0	0	0	0	1	1	0
2	3	3	0	99	14	1	18	0	92.2	91.9	177	92.05	22.6953	71.102	115	62	193	54	114	124	87	1	0	0	0	0	0	0	0	0	0	0	0	1	1	0	1	0	0	1	2	0	0	0	0	0	1	1	0
2	3	5	0	99	5	2	18	0	69.8	69.5	163	69.65	18.4335	48.976	106	63	125	52	64	45	76	1	0	0	0	0	0	0	0	0	0	0	0	0	0	0	0	0	0	0	0	0	0	0	0	0	0	0	0
2	3	99	0	99	17	2	18	0	63.1	64	155	63.55	15.2941	36.744	104	73	202	78	112	61	94	1	0	0	0	0	0	0	0	0	0	0	0	0	0	0	0	0	0	0	0	0	0	0	0	0	0	0	0
2	3	2	0	99	0	1	18	0	76.4	77.1	178	76.75	19.7311	62.516	116	72	122	38	71	66	97	1	0	0	1	0	0	0	1	0	0	0	1	0	1	0	0	0	1	0	1	0	0	0	0	1	0	1	0
2	3	5	0	99	0	2	18	0	68.4	68.4	164	68.4	17.2204	46.316	91	64	113	60	38	74	125	1	1	0	0	0	0	0	1	0	1	0	0	0	1	0	0	1	0	0	1	0	0	0	1	0	0	1	0
2	3	3	1	1	19	2	18	0	85.8	86.3	173	86.05	19.7387	59.076	105	64	152	55	87	51	97	1	0	1	0	0	0	0	0	0	0	0	0	0	0	0	1	0	0	0	1	0	0	0	0	0	0	0	0
2	3	4	0	99	0	1	18	0	80.9	81.2	180	81.05	19.291	62.503	111	58	160	64	82	68	81	1	0	0	0	0	0	0	0	0	0	0	0	0	0	0	0	0	0	0	0	0	0	0	0	0	0	0	0
2	3	5	0	99	5	2	18	0	94.9	95.3	158	95.1	30.6357	76.479	119	78	184	37	129	88	90	1	0	1	1	0	0	0	1	1	0	0	1	0	2	0	1	0	1	0	2	0	1	0	0	1	0	2	0
4	3	2	0	99	0	1	18	0	85.7	85.3	173	85.5	24.0713	72.043	128	74	141	64	62	73	139	1	1	0	0	0	0	0	1	0	1	0	0	0	1	0	0	1	0	0	1	0	0	0	1	0	0	1	0
2	3	3	0	99	4	2	18	0	83.7	83.5	166	83.6	23.6337	65.125	115	72	158	41	97	98	97	1	0	1	1	0	0	0	1	0	0	0	0	0	0	0	0	0	1	0	1	0	0	0	0	0	0	0	0
9	3	2	0	99	0	2	18	0	85.4	85.3	159	85.35	24.2162	61.221	112	73	225	88	135	8	98	1	0	1	0	0	0	0	0	0	0	0	0	0	0	0	1	0	0	0	1	0	0	0	0	0	0	0	0
2	3	4	0	99	0	2	18	0	82.4	82.4	161	82.4	23.165	60.046	109	65	179	39	122	91	86	1	0	1	1	0	0	0	1	0	0	0	1	0	1	0	0	0	1	0	1	0	0	0	0	1	0	1	0
2	3	2	0	99	0	2	18	0	68.7	68.2	167	68.45	16.0827	44.853	91	65	145	39	86	100	90	1	0	0	1	0	0	0	1	0	0	0	1	0	1	0	0	0	1	1	2	0	0	0	0	1	0	1	0
2	2	5	0	99	0	1	18	0	76.4	76.8	174	76.6	18.3062	55.424	120	69	118	46	63	47	99	1	0	0	0	0	0	0	0	0	0	0	0	0	0	0	0	0	0	0	0	0	0	0	0	0	0	0	0
2	2	4	0	99	4	2	18	0	94.2	94.5	160	94.35	26.459	67.735	111	68	163	30	105	139	78	1	0	1	1	0	0	0	1	1	0	0	1	1	3	1	1	0	1	1	3	1	1	0	0	1	1	3	1
2	3	5	0	99	0	1	18	0	78.1	79	186	78.55	20.7521	71.794	133	75	173	46	106	107	97	1	0	0	0	0	0	0	0	0	0	0	0	0	0	0	0	0	0	1	1	0	0	1	0	0	0	1	0
2	3	3	0	99	0	2	18	0	68	68.1	159	68.05	18.3497	46.39	96	61	176	105	62	43	85	1	0	0	0	0	0	0	0	0	0	0	0	0	0	0	0	0	0	0	0	0	0	0	0	0	0	0	0
2	3	3	0	99	0	1	18	0	82.3	82.8	175	82.55	21.953	67.231	110	67	193	44	120	146	76	1	0	0	0	0	0	0	0	0	0	0	0	1	1	0	0	0	1	1	2	0	0	0	0	0	1	1	0
5	3	2	0	99	0	2	18	0	86.4	86	166	86.2	24.7202	68.119	102	68	166	77	73	80	101	1	1	1	0	0	0	0	1	0	0	0	0	0	0	0	1	0	0	0	1	0	0	0	0	0	0	0	0
4	3	4	0	99	0	2	18	0	71.6	70.7	156	71.15	18.5511	45.146	99	62	174	62	100	59	87	1	0	0	0	0	0	0	0	0	0	0	0	0	0	0	0	0	0	0	0	0	0	0	0	0	0	0	0
2	3	3	0	99	0	1	19	0	73.4	73.6	163	73.5	20.6146	54.771	128	70	133	46	51	179	77	2	0	0	0	1	0	0	1	0	0	0	0	1	1	0	0	0	0	1	1	0	0	0	0	0	1	1	0
2	3	99	1	0	9	2	18	0	78.4	78.3	157	78.35	22.1202	54.524	90	51	149	47	81	105	95	1	0	0	1	0	0	0	1	0	0	0	0	0	0	0	0	0	1	1	2	0	0	0	0	0	0	0	0
2	2	5	0	99	10	2	18	0	82.6	83	176	82.8	25.8455	80.059	135	76	154	62	82	51	89	1	0	1	0	0	0	0	0	0	0	0	0	0	0	0	0	0	0	0	0	0	0	1	0	0	0	1	0
2	3	3	0	99	13	2	18	0	93	93.3	161	93.15	30.4363	78.894	120	66	212	43	155	72	134	1	1	1	1	0	0	1	2	1	1	0	0	0	2	0	1	1	1	0	3	1	1	0	1	0	0	2	0
2	3	3	0	99	0	2	18	0	72.2	71.5	163	71.85	18.8754	50.15	104	68	131	49	73	45	86	1	0	0	1	0	0	0	1	0	0	0	0	0	0	0	0	0	1	0	1	0	0	0	0	0	0	0	0
2	1	4	0	99	0	2	18	0	84.6	83.6	156	84.1	25.7191	62.59	108	74	174	46	157	85	73	1	0	1	1	0	0	0	1	0	0	0	0	0	0	0	0	0	1	0	1	0	0	0	0	0	0	0	0
2	3	3	0	99	0	2	18	0	72.9	72.6	160	72.75	19.8746	50.879	97	65	146	40	92	69	115	1	1	0	1	0	0	0	2	0	1	0	1	0	2	0	0	1	1	0	2	0	0	0	1	1	0	2	0
2	3	4	0	99	3	2	18	0	86.6	86.3	165	86.45	24.4624	66.599	114	72	201	57	133	53	88	1	0	1	0	0	0	0	0	0	0	0	0	0	0	0	1	0	0	0	1	0	0	0	0	0	0	0	0
2	3	3	0	99	8	2	18	0	77.1	76.6	158	76.85	21.684	54.132	118	83	138	42	84	62	81	1	0	0	1	0	0	0	1	0	0	1	0	0	1	0	0	0	1	0	2	0	0	1	0	0	0	1	0
2	3	5	0	99	0	1	18	0	78.3	78.9	178	78.6	19.8848	63.003	106	59	165	35	106	121	121	1	1	0	1	0	0	0	2	0	1	0	1	1	3	1	0	1	1	1	3	1	0	0	1	1	1	3	1
2	3	5	0	99	0	1	18	0	72.3	73.3	170	72.8	19.2609	55.664	109	63	134	54	64	81	140	1	1	0	0	0	0	0	1	0	1	0	0	0	1	0	0	1	0	0	1	0	0	0	1	0	0	1	0
2	3	4	0	99	0	2	18	0	74.1	73.4	155	73.75	20.7097	49.755	111	80	164	53	95	79	119	1	1	0	0	0	0	0	1	0	1	0	0	0	1	0	0	1	0	0	1	0	0	1	1	0	0	2	0
5	2	3	0	99	1	2	18	0	87.2	88.1	172	87.65	22.4669	66.466	106	64	213	56	141	79	77	1	0	1	0	0	0	0	0	0	0	0	0	0	0	0	1	0	0	0	1	0	0	0	0	0	0	0	0
2	3	4	0	99	0	1	18	0	78.4	78.4	165	78.4	21.1038	57.455	138	76	149	44	93	62	86	1	0	0	0	0	0	0	0	0	0	0	0	0	0	0	0	0	1	0	1	0	0	1	0	0	0	1	0
9	3	5	0	99	0	2	18	0	69.1	69.3	154	69.2	17.2002	40.792	103	63	182	64	106	60	85	1	0	0	0	0	0	0	0	0	0	0	0	0	0	0	0	0	0	0	0	0	0	0	0	0	0	0	0
4	3	4	0	99	0	2	18	0	86	85.5	166	85.75	22.7845	62.785	112	78	146	45	88	65	90	1	0	1	1	0	0	0	1	0	0	0	0	0	0	0	1	0	1	0	2	0	0	0	0	0	0	0	0
4	2	5	0	99	2	2	18	0	75.6	75.9	168	75.75	20.6753	58.354	94	59	186	52	115	95	74	1	0	0	0	0	0	0	0	0	0	0	0	0	0	0	0	0	0	0	0	0	0	0	0	0	0	0	0
2	3	99	0	99	8	2	18	0	84.8	84	162	84.4	27.5297	72.249	108	69	156	37	90	146	86	1	0	1	1	0	0	0	1	0	0	0	1	1	2	0	0	0	1	1	2	0	0	0	0	1	1	2	0
5	3	2	0	99	0	2	18	0	84.7	85.7	157	85.2	24.9527	61.506	106	73	145	41	88	80	83	1	0	1	1	0	0	0	1	0	0	0	0	0	0	0	1	0	1	0	2	0	0	0	0	0	0	0	0
10	1	99	1	0	23	1	18	0	80.7	80.6	183	80.65	20.5223	68.727	119	74	135	51	66	88	99	1	0	0	0	0	0	0	0	0	0	0	0	0	0	0	0	0	0	0	0	0	0	0	0	0	0	0	0
2	3	99	0	99	0	2	18	0	73.3	73.6	164	73.45	18.389	49.459	110	72	151	50	86	73	81	1	0	0	0	0	0	0	0	0	0	0	0	0	0	0	0	0	0	0	0	0	0	0	0	0	0	0	0
2	3	99	0	99	5	2	18	0	74.1	74.6	166	74.35	18.3361	50.527	102	75	128	59	58	53	109	1	1	0	0	0	0	0	1	0	0	0	0	0	0	0	0	0	0	0	0	0	0	0	0	0	0	0	0
5	3	3	0	99	0	1	18	0	91.1	90.7	184	90.9	20.0337	67.826	129	72	122	40	54	139	94	1	0	0	0	0	0	0	0	0	0	0	1	1	2	0	1	0	1	1	3	1	0	0	0	1	1	2	0
2	3	4	0	99	0	2	18	0	78	78.3	165	78.15	19.6459	53.486	101	67	166	55	103	41	89	1	0	0	0	0	0	0	0	0	0	0	0	0	0	0	0	0	0	0	0	0	0	0	0	0	0	0	0
2	3	4	0	99	6	2	19	0	92.5	92.6	164	92.55	29.7189	79.932	113	73	176	60	104	60	102	2	1	1	0	0	0	0	1	1	0	0	0	0	1	0	1	0	0	0	1	0	1	0	0	0	0	1	0
2	3	3	0	99	0	1	18	0	81.8	81.8	173	81.8	19.3518	57.918	102	62	179	37	119	116	93	1	0	0	1	0	0	0	1	0	0	0	1	1	2	0	0	0	1	1	2	0	0	0	0	1	1	2	0
9	3	4	0	99	0	2	18	0	81	81.6	160	81.3	23.4457	60.021	108	68	153	40	102	56	91	1	0	1	1	0	0	0	1	0	0	0	1	0	1	0	0	0	1	0	1	0	0	0	0	1	0	1	0
2	3	5	0	99	5	2	18	0	83.8	84	170	83.9	20.9183	60.454	120	67	139	48	74	85	86	1	0	1	1	0	0	0	1	0	0	0	0	0	0	0	0	0	1	0	1	0	0	0	0	0	0	0	0
9	3	3	0	99	0	2	18	0	97.1	97.3	167	97.2	29.1402	81.269	116	77	162	53	90	93	88	1	0	1	0	0	0	0	0	1	0	0	0	0	1	0	1	0	0	0	1	0	1	0	0	0	0	1	0
2	3	4	0	99	4	1	18	0	83.7	83.6	176	83.65	19.5597	60.588	119	62	159	42	86	156	85	1	0	0	0	1	0	0	1	0	0	0	0	1	1	0	0	0	1	1	2	0	0	0	0	0	1	1	0
9	1	4	0	99	0	2	18	0	76.4	76.2	174	76.3	20.6061	62.387	104	64	97	46	41	48	100	1	1	0	1	0	0	0	2	0	0	0	0	0	0	0	0	0	1	0	1	0	0	0	0	0	0	0	0
4	3	2	0	99	2	2	18	0	87.4	87.8	165	87.6	25.1287	68.413	115	70	157	42	91	122	107	1	1	1	1	0	0	1	2	0	0	0	0	1	1	0	1	0	1	1	3	1	0	0	0	0	1	1	0
5	3	3	1	0	3	1	18	0	76.7	76.8	175	76.75	18.8555	57.745	94	60	125	25	78	112	90	1	0	0	1	0	0	0	1	0	0	0	1	1	2	0	0	0	1	1	2	0	0	0	0	1	1	2	0
9	3	4	0	99	0	2	18	0	77.2	76.5	155	76.85	19.5471	46.962	103	65	166	50	97	96	93	1	0	0	0	0	0	0	0	0	0	0	0	0	0	0	0	0	0	0	0	0	0	0	0	0	0	0	0
5	3	3	0	99	0	2	18	0	84.7	84.7	167	84.7	25.4548	70.991	105	72	115	42	62	53	90	1	0	1	1	0	0	0	1	0	0	0	0	0	0	0	1	0	1	0	2	0	0	0	0	0	0	0	0
2	3	99	0	99	0	2	18	0	73.9	73.4	158	73.65	21.6664	54.088	113	74	146	61	76	43	89	1	0	0	0	0	0	0	0	0	0	0	0	0	0	0	0	0	0	0	0	0	0	0	0	0	0	0	0
5	2	3	0	99	0	2	18	0	74.8	75.5	172	75.15	20.167	59.662	110	61	159	66	81	60	90	1	0	0	0	0	0	0	0	0	0	0	0	0	0	0	0	0	0	0	0	0	0	0	0	0	0	0	0
5	1	4	0	99	0	2	18	0	77.7	77.5	165	77.6	20.8628	56.799	109	64	160	62	86	60	89	1	0	0	0	0	0	0	0	0	0	0	0	0	0	0	0	0	0	0	0	0	0	0	0	0	0	0	0
2	2	4	0	99	0	2	18	0	78.9	78.4	162	78.65	18.7677	49.254	110	63	175	55	99	107	86	1	0	0	0	0	0	0	0	0	0	0	0	0	0	0	0	0	0	1	1	0	0	0	0	0	0	0	0
2	2	5	0	99	0	2	18	0	69.2	68.4	167	68.8	18.3979	51.31	132	78	159	60	84	77	100	1	1	0	0	0	0	0	1	0	0	0	0	0	0	0	0	0	0	0	0	0	0	1	0	0	0	1	0
5	3	4	0	99	0	1	18	0	90.5	90	175	90.25	23.8096	72.917	120	73	129	53	67	47	83	1	0	0	0	0	0	0	0	0	0	0	0	0	0	0	1	0	0	0	1	0	0	0	0	0	0	0	0
2	3	5	1	1	22	2	19	0	73.1	73.6	161	73.35	18.5421	48.063	103	61	159	89	59	55	93	2	0	0	0	0	0	0	0	0	0	0	0	0	0	0	0	0	0	0	0	0	0	0	0	0	0	0	0
4	3	3	0	99	15	2	18	0	84.6	84.3	160	84.45	24.3574	62.355	111	67	164	73	76	77	79	1	0	1	0	0	0	0	0	0	0	0	0	0	0	0	0	0	0	0	0	0	0	0	0	0	0	0	0
2	3	0	0	99	0	1	18	0	74.9	73.9	176	74.4	18.0026	55.765	106	57	166	26	113	137	65	1	0	0	1	0	0	0	1	0	0	0	1	1	2	0	0	0	1	1	2	0	0	0	0	1	1	2	0
2	2	5	0	99	0	1	18	0	95.9	96.2	173	96.05	25.9992	77.813	149	73	179	45	115	95	103	1	1	1	0	0	0	0	1	1	0	0	0	0	1	0	1	0	0	0	1	0	1	1	0	0	0	2	0
5	3	5	0	99	0	2	18	0	74.8	75.7	155	75.25	19.5272	46.914	100	67	137	46	76	74	116	1	1	0	1	0	0	0	2	0	1	0	0	0	1	0	0	1	1	0	2	0	0	0	1	0	0	1	0
5	3	3	0	99	0	2	18	0	86	86.5	161	86.25	26.4214	68.487	110	67	201	39	130	159	94	1	0	1	1	1	0	1	2	0	0	0	1	1	2	0	1	0	1	1	3	1	0	0	0	1	1	2	0
2	3	3	0	99	10	1	18	0	86.2	86.7	175	86.45	22.5355	69.015	103	67	183	48	106	145	102	1	1	0	0	0	0	0	1	0	0	0	0	1	1	0	0	0	0	1	1	0	0	0	0	0	1	1	0
2	3	2	0	99	0	1	18	0	82.4	82.7	166	82.55	20.9388	57.699	111	62	160	33	113	72	84	1	0	0	1	0	0	0	1	0	0	0	1	0	1	0	0	0	1	0	1	0	0	0	0	1	0	1	0
4	3	3	0	99	0	1	18	0	88.1	88.3	172	88.2	25.239	74.667	128	64	8	42	102	108	87	1	0	0	0	0	0	0	0	0	0	0	0	0	0	0	1	0	1	1	3	1	0	0	0	0	0	0	0
2	3	4	0	99	3	1	18	0	83.6	84.6	181	84.1	19.7408	64.673	105	72	125	40	72	67	90	1	0	0	0	0	0	0	0	0	0	0	1	0	1	0	0	0	1	0	1	0	0	0	0	1	0	1	0
2	3	3	0	99	0	2	18	0	75.3	75.6	177	75.45	18.2183	57.076	104	64	139	46	78	76	78	1	0	0	1	0	0	0	1	0	0	0	0	0	0	0	0	0	1	0	1	0	0	0	0	0	0	0	0
5	3	99	0	99	6	2	18	0	95.8	95.2	155	95.5	24.3813	58.576	118	82	165	46	104	76	80	1	0	1	1	0	0	0	1	1	0	1	0	0	2	0	1	0	1	0	3	1	1	1	0	0	0	2	0
2	3	4	0	99	0	2	18	0	74.8	74.5	160	74.65	21.9961	56.31	113	72	183	58	109	78	92	1	0	0	0	0	0	0	0	0	0	0	0	0	0	0	0	0	0	0	0	0	0	0	0	0	0	0	0
2	3	4	0	99	0	1	18	0	94.8	94.7	181	94.75	25.4241	83.292	117	63	135	52	71	62	88	1	0	1	0	0	0	0	0	1	0	0	0	0	1	0	1	0	0	0	1	0	1	0	0	0	0	1	0
2	3	99	1	0	1	2	18	0	97.4	96.9	166	97.15	27.2209	75.01	115	83	179	31	115	164	105	1	1	1	1	1	0	1	3	1	0	0	1	1	3	1	1	0	1	1	3	1	1	1	0	1	1	4	1
2	2	4	0	99	3	2	18	0	77.4	76.7	159	77.05	20.9137	52.872	113	74	162	49	94	96	97	1	0	0	1	0	0	0	1	0	0	0	0	0	0	0	0	0	1	0	1	0	0	0	0	0	0	0	0
5	3	3	0	99	0	1	18	0	72.6	73.3	178	72.95	17.1557	54.356	117	59	89	37	43	45	98	1	0	0	1	0	0	0	1	0	0	0	1	0	1	0	0	0	1	0	1	0	0	0	0	1	0	1	0
2	3	1	0	99	14	1	18	0	76.7	76.6	165	76.65	19.7969	53.897	113	58	122	55	50	87	98	1	0	0	0	0	0	0	0	0	0	0	0	0	0	0	0	0	0	0	0	0	0	0	0	0	0	0	0
2	3	99	1	1	0	1	18	0	70.2	69.5	178	69.85	15.8061	50.08	109	62	166	58	92	81	88	1	0	0	0	0	0	0	0	0	0	0	0	0	0	0	0	0	0	0	0	0	0	0	0	0	0	0	0
2	3	4	0	99	7	1	18	0	86.9	87.3	176	87.1	23.7487	73.564	135	84	137	28	41	340	104	1	1	0	1	1	0	0	3	0	0	0	1	1	2	0	0	0	1	1	2	0	0	1	0	1	1	3	1
2	3	4	0	99	0	2	18	0	81.8	82.2	162	82	23.9045	62.735	101	70	238	44	179	75	135	1	1	1	1	0	0	1	2	0	1	0	0	0	1	0	0	1	1	0	2	0	0	0	1	0	0	1	0
2	2	5	0	99	0	2	18	0	73.1	73.3	164	73.2	17.8357	47.971	99	66	206	85	99	108	78	1	0	0	0	0	0	0	0	0	0	0	0	0	0	0	0	0	0	1	1	0	0	0	0	0	0	0	0
5	1	1	1	1	11	2	18	0	75.4	75.6	163	75.5	19.338	51.379	92	62	169	72	78	93	80	1	0	0	0	0	0	0	0	0	0	0	0	0	0	0	0	0	0	0	0	0	0	0	0	0	0	0	0
2	3	2	0	99	0	1	18	0	91.8	91	190	91.4	22.9044	82.685	123	66	110	34	45	157	82	1	0	0	1	1	0	0	2	0	0	0	1	1	2	0	1	0	1	1	3	1	0	0	0	1	1	2	0
9	1	3	0	99	4	2	18	0	73.7	73.7	151	73.7	21.7653	49.627	107	64	209	57	141	56	99	1	0	0	0	0	0	0	0	0	0	0	0	0	0	0	0	0	0	0	0	0	0	0	0	0	0	0	0
2	1	5	0	99	3	2	18	0	77.6	77.6	164	77.6	21.2266	57.091	99	67	157	45	88	121	95	1	0	0	1	0	0	0	1	0	0	0	0	1	1	0	0	0	1	1	2	0	0	0	0	0	1	1	0
5	3	2	1	1	15	1	18	0	80.9	80.5	168	80.7	23.164	65.378	102	72	175	70	92	63	90	1	0	0	0	0	0	0	0	0	0	0	0	0	0	0	0	0	0	0	0	0	0	0	0	0	0	0	0
2	1	3	0	99	0	2	18	0	67.1	66.7	162	66.9	14.8297	38.919	75	54	143	45	83	75	85	1	0	0	1	0	0	0	1	0	0	0	0	0	0	0	0	0	1	0	1	0	0	0	0	0	0	0	0
9	3	5	0	99	0	2	18	0	70.7	71.3	166	71	17.8705	49.244	113	69	184	53	114	84	158	1	1	0	0	0	0	0	1	0	1	0	0	0	1	0	0	1	0	0	1	0	0	0	1	0	0	1	0
2	1	4	0	99	2	2	18	0	88.8	88.7	159	88.75	26.4103	66.768	115	80	211	58	130	115	89	1	0	1	0	0	0	0	0	0	0	0	0	1	1	0	1	0	0	1	2	0	0	1	0	0	1	2	0
2	3	99	0	99	8	2	18	0	87.6	87	174	87.3	24.8771	75.318	105	66	130	46	67	83	84	1	0	1	1	0	0	0	1	0	0	0	0	0	0	0	1	0	1	0	2	0	0	0	0	0	0	0	0
5	2	3	0	99	7	2	18	0	74.7	74.7	166	74.7	18.7894	51.776	102	64	160	73	77	51	97	1	0	0	0	0	0	0	0	0	0	0	0	0	0	0	0	0	0	0	0	0	0	0	0	0	0	0	0
2	2	4	0	99	0	1	18	0	83.9	83.2	171	83.55	20.6269	60.315	103	60	134	41	76	84	94	1	0	0	0	0	0	0	0	0	0	0	0	0	0	0	0	0	1	0	1	0	0	0	0	0	0	0	0
2	2	5	0	99	0	2	18	0	74.6	75.4	169	75	17.9097	51.152	108	61	122	53	48	106	89	1	0	0	0	0	0	0	0	0	0	0	0	0	0	0	0	0	0	1	1	0	0	0	0	0	0	0	0
5	3	2	0	99	7	2	18	0	79.4	80.2	162	79.8	20.8745	54.783	117	71	205	47	146	62	100	1	1	0	1	0	0	0	2	0	0	0	0	0	0	0	0	0	1	0	1	0	0	0	0	0	0	0	0
2	3	3	0	99	0	2	18	0	80.6	79.9	157	80.25	21.5972	53.235	113	68	143	37	77	144	101	1	1	1	1	0	0	1	2	0	0	0	1	1	2	0	0	0	1	1	2	0	0	0	0	1	1	2	0
2	2	4	0	99	0	2	18	0	98	97.9	163	97.95	29.9827	79.661	114	82	173	30	116	133	88	1	0	1	1	0	0	0	1	1	0	0	1	1	3	1	1	0	1	1	3	1	1	1	0	1	1	4	1
2	3	4	0	99	8	2	18	0	81.6	80.7	158	81.15	22.105	55.183	114	67	139	62	65	62	104	1	1	1	0	0	0	0	1	0	0	0	0	0	0	0	0	0	0	0	0	0	0	0	0	0	0	0	0
2	1	99	0	99	6	2	18	0	71.5	72.3	159	71.9	16.6291	42.04	101	70	167	60	90	87	95	1	0	0	0	0	0	0	0	0	0	0	0	0	0	0	0	0	0	0	0	0	0	0	0	0	0	0	0
4	3	4	0	99	0	2	18	0	69.6	69.9	149	69.75	16.6533	36.972	103	76	191	63	113	84	88	1	0	0	0	0	0	0	0	0	0	0	0	0	0	0	0	0	0	0	0	0	0	0	0	0	0	0	0
10	3	3	0	99	0	2	18	0	107.2	107.2	161	107.2	41.4961	107.562	112	75	131	37	67	136	100	1	1	1	1	0	0	1	2	1	0	0	1	1	3	1	1	0	1	1	3	1	1	0	0	1	1	3	1
2	3	2	0	99	1	2	18	0	80.1	80.3	158	80.2	21.6083	53.943	106	71	144	49	82	65	83	1	0	1	1	0	0	0	1	0	0	0	0	0	0	0	0	0	1	0	1	0	0	0	0	0	0	0	0
2	3	4	0	99	0	1	18	0	72	72.6	168	72.3	19.916	56.211	122	75	166	67	89	50	86	1	0	0	0	0	0	0	0	0	0	0	0	0	0	0	0	0	0	0	0	0	0	0	0	0	0	0	0
5	2	1	0	99	5	2	18	0	77.8	77.7	162	77.75	19.952	52.362	109	72	153	72	75	32	103	1	1	0	0	0	0	0	1	0	0	0	0	0	0	0	0	0	0	0	0	0	0	0	0	0	0	0	0
3	3	3	0	99	0	2	18	0	79.8	80.1	158	79.95	20.4739	51.111	109	78	179	58	106	75	80	1	0	0	0	0	0	0	0	0	0	0	0	0	0	0	0	0	0	0	0	0	0	0	0	0	0	0	0
2	3	5	0	99	0	1	18	0	73.9	74.2	177	74.05	18.1535	56.873	110	66	153	77	63	67	111	1	1	0	0	0	0	0	1	0	1	0	0	0	1	0	0	1	0	0	1	0	0	0	1	0	0	1	0
2	2	5	0	99	0	2	18	0	78.7	79.2	168	78.95	21.3276	60.195	113	71	205	58	128	93	79	1	0	0	0	0	0	0	0	0	0	0	0	0	0	0	0	0	0	0	0	0	0	0	0	0	0	0	0
2	3	3	0	99	0	1	18	0	81.5	81.6	174	81.55	20.1896	61.126	127	71	146	44	88	69	88	1	0	0	0	0	0	0	0	0	0	0	0	0	0	0	0	0	1	0	1	0	0	0	0	0	0	0	0
2	1	3	0	99	1	2	18	0	73.5	74	158	73.75	19.7701	49.354	109	71	163	56	91	79	111	1	1	0	0	0	0	0	1	0	1	0	0	0	1	0	0	1	0	0	1	0	0	0	1	0	0	1	0
2	3	4	0	99	0	1	18	0	72.6	72.1	173	72.35	16.3751	49.009	119	73	104	44	51	46	88	1	0	0	0	0	0	0	0	0	0	0	0	0	0	0	0	0	1	0	1	0	0	0	0	0	0	0	0
2	3	5	0	99	3	1	18	0	79.6	79.7	172	79.65	18.5891	54.994	107	70	228	54	153	107	109	1	1	0	0	0	0	0	1	0	0	0	0	0	0	0	0	0	0	1	1	0	0	0	0	0	0	0	0
2	2	5	0	99	0	2	18	0	84.5	84.3	156	84.4	23.4747	57.128	105	70	155	56	81	91	84	1	0	1	0	0	0	0	0	0	0	0	0	0	0	0	0	0	0	0	0	0	0	0	0	0	0	0	0
5	3	4	0	99	0	1	18	0	73	73.3	170	73.15	17.6467	50.999	118	74	136	53	73	50	89	1	0	0	0	0	0	0	0	0	0	0	0	0	0	0	0	0	0	0	0	0	0	0	0	0	0	0	0
5	3	4	0	99	15	1	18	0	96.1	96.6	177	96.35	25.7895	80.796	124	80	128	41	74	64	97	1	0	1	0	0	0	0	0	1	0	0	0	0	1	0	1	0	1	0	2	0	1	1	0	0	0	2	0
4	3	99	0	99	8	2	18	0	79.1	79.9	157	79.5	24.057	59.298	115	80	172	47	103	110	78	1	0	0	1	0	0	0	1	0	0	0	0	1	1	0	0	0	1	1	2	0	0	1	0	0	1	2	0
2	3	4	0	99	8	2	19	0	96.9	96.9	162	96.9	28.959	76	128	89	173	31	102	202	112	2	1	1	1	1	0	1	3	1	1	0	1	1	4	1	1	1	1	1	4	1	1	1	1	1	1	5	1
2	3	4	0	99	1	2	18	0	77.5	77.6	163	77.55	21.1156	56.102	102	63	148	54	83	57	99	1	0	0	0	0	0	0	0	0	0	0	0	0	0	0	0	0	0	0	0	0	0	0	0	0	0	0	0
2	3	4	0	99	0	1	19	0	73.9	74.2	168	74.05	17.8579	50.402	115	61	121	41	62	89	86	2	0	0	0	0	0	0	0	0	0	0	0	0	0	0	0	0	1	0	1	0	0	0	0	0	0	0	0
2	3	3	0	99	0	2	18	0	83.2	82.5	161	82.85	23.4304	60.734	116	77	192	49	130	65	98	1	0	1	1	0	0	0	1	0	0	0	0	0	0	0	0	0	1	0	1	0	0	0	0	0	0	0	0
2	3	5	0	99	0	2	18	0	73.3	73.6	154	73.45	19.1883	45.507	100	69	131	57	64	48	86	1	0	0	0	0	0	0	0	0	0	0	0	0	0	0	0	0	0	0	0	0	0	0	0	0	0	0	0
2	1	3	0	99	0	2	18	0	66.1	65.8	151	65.95	18.3132	41.756	102	64	170	56	103	54	91	1	0	0	0	0	0	0	0	0	0	0	0	0	0	0	0	0	0	0	0	0	0	0	0	0	0	0	0
2	3	5	0	99	0	2	18	0	67.6	67.3	171	67.45	15.507	45.344	108	70	149	40	94	75	101	1	1	0	1	0	0	0	2	0	0	0	1	0	1	0	0	0	1	0	1	0	0	0	0	1	0	1	0
2	3	4	0	99	0	2	18	0	83.2	83.4	159	83.3	26.0049	65.743	119	69	127	46	72	44	83	1	0	1	1	0	0	0	1	0	0	0	0	0	0	0	0	0	1	0	1	0	0	0	0	0	0	0	0
2	3	5	0	99	0	1	18	0	81.1	80.4	172	80.75	22.6494	67.006	114	61	137	38	84	77	86	1	0	0	1	0	0	0	1	0	0	0	1	0	1	0	0	0	1	0	1	0	0	0	0	1	0	1	0
2	3	99	1	1	0	1	18	0	81.8	82.1	180	81.95	21.1386	68.489	119	60	170	55	104	57	92	1	0	0	0	0	0	0	0	0	0	0	0	0	0	0	0	0	0	0	0	0	0	0	0	0	0	0	0
2	3	99	0	99	0	1	18	0	86.4	86.7	176	86.55	24.0383	74.461	117	76	111	39	61	56	93	1	0	0	1	0	0	0	1	0	0	0	1	0	1	0	0	0	1	0	1	0	0	0	0	1	0	1	0
2	3	4	0	99	4	2	18	0	67.9	67.1	167	67.5	17.2025	47.976	85	54	188	59	120	43	88	1	0	0	0	0	0	0	0	0	0	0	0	0	0	0	0	0	0	0	0	0	0	0	0	0	0	0	0
2	3	2	0	99	0	1	18	0	80.3	80	164	80.15	20.6867	55.639	111	67	189	41	103	224	77	1	0	0	0	1	0	0	1	0	0	0	0	1	1	0	0	0	1	1	2	0	0	0	0	0	1	1	0
5	1	2	0	99	0	2	18	0	72	71.2	176	71.6	15.8965	49.241	102	63	202	81	109	59	78	1	0	0	0	0	0	0	0	0	0	0	0	0	0	0	0	0	0	0	0	0	0	0	0	0	0	0	0
2	1	2	0	99	0	1	18	0	89	89.4	169	89.2	23.677	67.624	135	82	178	37	118	116	120	1	1	0	1	0	0	0	2	0	1	1	1	1	4	1	1	1	1	1	5	1	0	1	1	1	1	4	1
2	3	5	0	99	5	2	19	0	75.5	76.1	157	75.8	21.5063	53.011	97	63	172	67	90	77	79	2	0	0	0	0	0	0	0	0	0	0	0	0	0	0	0	0	0	0	0	0	0	0	0	0	0	0	0
2	3	2	0	99	13	1	18	0	82.8	83.8	177	83.3	22.4364	70.291	132	75	162	48	91	117	97	1	0	0	0	0	0	0	0	0	0	0	0	1	1	0	0	0	0	1	1	0	0	1	0	0	1	2	0
2	3	4	1	0	6	1	18	0	81.8	82.7	170	82.25	21.0235	60.758	121	69	149	36	98	77	106	1	1	0	1	0	0	0	2	0	0	0	1	0	1	0	0	0	1	0	1	0	0	0	0	1	0	1	0
5	1	4	0	99	0	1	18	0	89.3	89.1	176	89.2	25.245	78.199	121	64	137	29	96	59	83	1	0	0	1	0	0	0	1	0	0	0	1	0	1	0	1	0	1	0	2	0	0	0	0	1	0	1	0
2	3	5	0	99	0	2	18	0	84.8	85.5	155	85.15	23.1967	55.73	113	70	183	59	107	85	77	1	0	1	0	0	0	0	0	0	0	0	0	0	0	0	1	0	0	0	1	0	0	0	0	0	0	0	0
2	3	3	0	99	2	2	18	0	79.4	78.7	172	79.05	22.0295	65.172	114	73	165	64	88	66	100	1	1	0	0	0	0	0	1	0	0	0	0	0	0	0	0	0	0	0	0	0	0	0	0	0	0	0	0
2	1	5	0	99	0	2	18	0	89.6	89.1	162	89.35	24.0405	63.092	117	73	157	42	74	205	106	1	1	1	1	1	0	1	3	0	0	0	0	1	1	0	1	0	1	1	3	1	0	0	0	0	1	1	0
4	3	2	0	99	0	1	18	0	81.4	80.9	175	81.15	20.4369	62.588	120	65	155	57	88	48	107	1	1	0	0	0	0	0	1	0	0	0	0	0	0	0	0	0	0	0	0	0	0	0	0	0	0	0	0
2	2	3	0	99	0	1	18	0	77.1	76.2	170	76.65	18.2917	52.863	108	67	158	42	99	85	104	1	1	0	0	0	0	0	1	0	0	0	0	0	0	0	0	0	1	0	1	0	0	0	0	0	0	0	0
2	3	2	0	99	0	1	18	0	80	80.5	177	80.25	20.6741	64.77	119	58	129	46	72	57	89	1	0	0	0	0	0	0	0	0	0	0	0	0	0	0	0	0	0	0	0	0	0	0	0	0	0	0	0
2	3	4	0	99	0	2	18	0	84	84.3	160	84.15	21.775	55.744	110	74	180	74	93	64	112	1	1	1	0	0	0	0	1	0	1	0	0	0	1	0	0	1	0	0	1	0	0	0	1	0	0	1	0
2	3	5	1	0	6	1	18	0	86.6	86.6	172	86.6	22.9526	67.903	139	76	155	46	92	84	110	1	1	0	0	0	0	0	1	0	1	0	0	0	1	0	0	1	0	0	1	0	0	1	1	0	0	2	0
2	3	5	0	99	4	2	18	0	76.1	75.1	159	75.6	21.3069	53.866	114	71	155	63	79	66	92	1	0	0	0	0	0	0	0	0	0	0	0	0	0	0	0	0	0	0	0	0	0	0	0	0	0	0	0
4	3	99	0	99	0	2	18	0	78.1	78.3	158	78.2	17.9406	44.787	112	79	164	47	94	113	89	1	0	0	1	0	0	0	1	0	0	0	0	1	1	0	0	0	1	1	2	0	0	0	0	0	1	1	0
5	3	99	0	99	0	1	18	0	93.4	93.4	192	93.4	21.6702	79.885	121	77	184	45	121	90	96	1	0	0	0	0	0	0	0	0	0	0	0	0	0	0	1	0	0	0	1	0	0	0	0	0	0	0	0
2	3	2	0	99	0	1	18	0	82	82.7	170	82.35	24.3069	70.247	125	75	180	43	117	98	94	1	0	0	0	0	0	0	0	0	0	0	0	0	0	0	0	0	1	0	1	0	0	0	0	0	0	0	0
2	3	4	0	99	0	2	18	0	95.4	95.6	161	95.5	28.8735	74.843	110	78	211	62	135	69	90	1	0	1	0	0	0	0	0	1	0	0	0	0	1	0	1	0	0	0	1	0	1	0	0	0	0	1	0
2	3	99	0	99	0	1	18	0	96	96.1	158	96.05	29.1307	72.722	127	87	201	61	128	62	84	1	0	1	0	0	0	0	0	1	0	0	0	0	1	0	1	0	0	0	1	0	1	1	0	0	0	2	0
5	1	4	0	99	0	2	18	0	82.1	82.5	167	82.3	20.3639	56.793	98	62	182	58	109	74	140	1	1	1	0	0	0	0	1	0	1	0	0	0	1	0	0	1	0	0	1	0	0	0	1	0	0	1	0
5	3	4	0	99	0	1	18	0	81.8	82.6	168	82.2	22.5702	63.702	123	82	95	46	35	70	88	1	0	0	0	0	0	0	0	0	0	0	0	0	0	0	0	0	0	0	0	0	0	1	0	0	0	1	0
2	1	4	0	99	0	1	18	0	80	80.1	169	80.05	20.813	59.444	122	79	139	43	82	70	89	1	0	0	0	0	0	0	0	0	0	0	0	0	0	0	0	0	1	0	1	0	0	0	0	0	0	0	0
9	3	3	0	99	0	1	18	0	73.6	73.5	163	73.55	20.1268	53.475	108	63	148	57	70	106	86	1	0	0	0	0	0	0	0	0	0	0	0	0	0	0	0	0	0	1	1	0	0	0	0	0	0	0	0
2	3	5	0	99	9	1	18	0	77	76.4	172	76.7	17.6163	52.116	104	68	140	43	85	62	88	1	0	0	0	0	0	0	0	0	0	0	0	0	0	0	0	0	1	0	1	0	0	0	0	0	0	0	0
2	2	3	0	99	0	2	18	0	69	69.1	147	69.05	18.8158	40.659	113	70	249	64	166	96	87	1	0	0	0	0	0	0	0	0	0	0	0	0	0	0	0	0	0	0	0	0	0	0	0	0	0	0	0
2	3	5	0	99	0	2	18	0	80.3	80.8	163	80.55	22.906	60.859	112	69	163	41	106	78	76	1	0	1	1	0	0	0	1	0	0	0	0	0	0	0	0	0	1	0	1	0	0	0	0	0	0	0	0
2	2	3	0	99	0	2	18	0	70.3	71	159	70.65	17.7086	44.769	99	72	147	62	75	52	88	1	0	0	0	0	0	0	0	0	0	0	0	0	0	0	0	0	0	0	0	0	0	0	0	0	0	0	0
2	1	99	0	99	0	2	18	0	65.6	65	153	65.3	17.3907	40.71	99	60	147	50	86	56	79	1	0	0	0	0	0	0	0	0	0	0	0	0	0	0	0	0	0	0	0	0	0	0	0	0	0	0	0
2	3	3	0	99	10	1	18	0	89.7	89.3	173	89.5	24.5952	73.611	129	86	154	40	93	105	100	1	1	0	0	0	0	0	1	0	0	0	1	0	1	0	1	0	1	1	3	1	0	1	0	1	0	2	0
2	1	5	0	99	0	1	18	0	71.9	71.8	170	71.85	18.4464	53.31	123	72	162	40	110	58	136	1	1	0	0	0	0	0	1	0	1	0	1	0	2	0	0	1	1	0	2	0	0	0	1	1	0	2	0
5	3	4	0	99	0	2	18	0	80.5	80.3	163	80.4	20.9707	55.717	109	66	162	41	92	146	86	1	0	1	1	0	0	0	1	0	0	0	0	1	1	0	0	0	1	1	2	0	0	0	0	0	1	1	0
2	3	5	0	99	9	1	18	0	79.6	79.7	171	79.65	20.2462	59.202	117	56	127	33	67	133	73	1	0	0	1	0	0	0	1	0	0	0	1	1	2	0	0	0	1	1	2	0	0	0	0	1	1	2	0
2	2	5	0	99	0	2	18	0	69.4	68.9	155	69.15	18.5461	44.557	96	63	142	44	85	64	96	1	0	0	1	0	0	0	1	0	0	0	0	0	0	0	0	0	1	0	1	0	0	0	0	0	0	0	0
2	3	4	0	99	0	2	18	0	73.7	73.4	156	73.55	19.0385	46.332	100	67	203	87	107	46	86	1	0	0	0	0	0	0	0	0	0	0	0	0	0	0	0	0	0	0	0	0	0	0	0	0	0	0	0
2	3	5	0	99	0	2	18	0	84.4	84.9	167	84.65	20.587	57.415	104	67	117	45	63	47	86	1	0	1	1	0	0	0	1	0	0	0	0	0	0	0	1	0	1	0	2	0	0	0	0	0	0	0	0
9	2	3	0	99	11	2	18	0	95	94.4	168	94.7	25.2675	71.315	118	74	162	42	93	85	87	1	0	1	1	0	0	0	1	1	0	0	0	0	1	0	1	0	1	0	2	0	1	0	0	0	0	1	0
2	3	3	0	99	8	2	18	0	70.8	71.5	167	71.15	17.0655	47.594	95	60	143	40	78	126	90	1	0	0	1	0	0	0	1	0	0	0	1	1	2	0	0	0	1	1	2	0	0	0	0	1	1	2	0
5	3	5	0	99	0	2	18	0	79.4	80.4	166	79.9	20.9929	57.848	115	79	110	45	59	29	76	1	0	0	1	0	0	0	1	0	0	0	0	0	0	0	0	0	1	0	1	0	0	0	0	0	0	0	0
2	3	4	1	1	11	1	18	0	77	76.8	163	76.9	20.6037	54.742	120	55	237	86	139	62	78	1	0	0	0	0	0	0	0	0	0	0	0	0	0	0	0	0	0	0	0	0	0	0	0	0	0	0	0
2	3	2	0	99	3	1	18	0	71.5	71.9	168	71.7	18.3946	51.917	105	69	156	72	68	82	102	1	1	0	0	0	0	0	1	0	0	0	0	0	0	0	0	0	0	0	0	0	0	0	0	0	0	0	0
2	2	4	1	1	19	1	18	0	84.8	85.2	179	85	21.7918	69.823	107	71	168	49	108	56	137	1	1	0	0	0	0	0	1	0	1	0	0	0	1	0	0	1	0	0	1	0	0	0	1	0	0	1	0
2	3	4	0	99	14	1	19	0	93.3	93	182.7	93.15	24.1674	80.669	138	80	167	40	108	94	115	2	1	0	0	0	0	0	1	0	1	0	1	0	2	0	1	1	1	0	3	1	0	1	1	1	0	3	1
2	1	99	0	99	0	1	18	0	93.2	93.1	171	93.15	25.2512	73.837	122	84	193	23	142	141	112	1	1	0	1	0	0	0	2	0	1	0	1	1	3	1	1	1	1	1	4	1	0	1	1	1	1	4	1
2	3	3	0	99	0	2	18	0	72.4	72.6	170	72.5	18.3087	52.912	95	63	149	48	86	77	95	1	0	0	1	0	0	0	1	0	0	0	0	0	0	0	0	0	1	0	1	0	0	0	0	0	0	0	0
2	1	5	0	99	0	1	18	0	83.7	82.9	172	83.3	21.7574	64.367	115	66	145	47	79	95	91	1	0	0	0	0	0	0	0	0	0	0	0	0	0	0	0	0	0	0	0	0	0	0	0	0	0	0	0
2	3	99	0	99	0	1	18	0	76.4	76.4	162	76.4	21.5032	56.433	118	62	122	49	61	58	96	1	0	0	0	0	0	0	0	0	0	0	0	0	0	0	0	0	0	0	0	0	0	0	0	0	0	0	0
2	3	4	0	99	0	2	18	0	77.5	76.8	165	77.15	18.8154	51.225	110	66	107	31	39	185	96	1	0	0	1	1	0	0	2	0	0	0	1	1	2	0	0	0	1	1	2	0	0	0	0	1	1	2	0
4	2	4	0	99	3	2	18	0	86.7	87.4	163	87.05	26.1662	69.521	119	78	173	54	96	117	106	1	1	1	0	0	0	0	1	0	0	0	0	1	1	0	1	0	0	1	2	0	0	0	0	0	1	1	0
2	2	5	0	99	0	2	18	0	83.1	82.2	170	82.65	22.2073	64.179	110	68	173	50	109	68	122	1	1	1	0	0	0	0	1	0	1	0	0	0	1	0	0	1	0	0	1	0	0	0	1	0	0	1	0
4	3	99	0	99	0	2	18	0	69	69.6	158	69.3	18.336	45.774	94	59	127	60	59	42	80	1	0	0	0	0	0	0	0	0	0	0	0	0	0	0	0	0	0	0	0	0	0	0	0	0	0	0	0
2	3	5	0	99	6	2	18	0	75.9	75.8	168	75.85	20.9332	59.082	110	63	138	51	73	68	85	1	0	0	0	0	0	0	0	0	0	0	0	0	0	0	0	0	0	0	0	0	0	0	0	0	0	0	0
5	1	5	0	99	0	2	18	0	79.6	79.4	156	79.5	24.7415	60.211	113	70	142	74	57	53	81	1	0	0	0	0	0	0	0	0	0	0	0	0	0	0	0	0	0	0	0	0	0	0	0	0	0	0	0
2	1	2	0	99	0	2	18	0	75.5	74.8	161	75.15	21.8911	56.744	111	68	196	57	126	67	98	1	0	0	0	0	0	0	0	0	0	0	0	0	0	0	0	0	0	0	0	0	0	0	0	0	0	0	0
4	2	5	0	99	0	2	18	0	81.5	81.9	166	81.7	22.6593	62.44	126	84	131	60	61	49	111	1	1	1	0	0	0	0	1	0	1	1	0	0	2	0	0	1	0	0	2	0	0	1	1	0	0	2	0
2	2	4	0	99	14	1	18	0	69.1	69	169	69.05	17.2497	49.267	100	61	156	61	83	59	82	1	0	0	0	0	0	0	0	0	0	0	0	0	0	0	0	0	0	0	0	0	0	0	0	0	0	0	0
4	3	5	0	99	2	2	18	0	70.7	71.2	155	70.95	20.3754	48.952	112	72	114	42	61	54	83	1	0	0	1	0	0	0	1	0	0	0	0	0	0	0	0	0	1	0	1	0	0	0	0	0	0	0	0
2	3	3	0	99	0	1	18	0	76.6	75.9	173	76.25	18.8379	56.38	100	55	88	46	31	53	89	1	0	0	0	0	0	0	0	0	0	0	0	0	0	0	0	0	0	0	0	0	0	0	0	0	0	0	0
2	1	5	0	99	10	2	18	0	72.5	73.5	161	73	17.6066	45.638	110	73	177	52	111	68	91	1	0	0	0	0	0	0	0	0	0	0	0	0	0	0	0	0	0	0	0	0	0	0	0	0	0	0	0
2	3	5	0	99	0	2	18	0	77.2	77	152	77.1	21.1253	48.808	107	75	205	79	100	129	91	1	0	0	0	0	0	0	0	0	0	0	0	1	1	0	0	0	0	1	1	0	0	0	0	0	1	1	0
2	3	3	0	99	1	2	18	0	71.3	71.6	162	71.45	19.1225	50.185	106	77	171	61	92	90	72	1	0	0	0	0	0	0	0	0	0	0	0	0	0	0	0	0	0	0	0	0	0	0	0	0	0	0	0
2	2	5	0	99	0	2	18	0	71	71.1	163	71.05	18.8543	50.094	111	72	165	65	89	55	80	1	0	0	0	0	0	0	0	0	0	0	0	0	0	0	0	0	0	0	0	0	0	0	0	0	0	0	0
2	3	4	0	99	10	1	18	0	84.3	84.5	177	84.4	21.8207	68.362	135	70	133	48	64	107	126	1	1	0	0	0	0	0	1	0	1	0	0	0	1	0	0	1	0	1	2	0	0	1	1	0	0	2	0
10	3	3	0	99	0	1	18	0	87.8	88.2	168	88	25.1704	71.041	117	63	164	56	82	132	91	1	0	0	0	0	0	0	0	0	0	0	0	1	1	0	1	0	0	1	2	0	0	0	0	0	1	1	0
2	3	5	0	99	0	1	18	0	109.3	108.8	180	109.05	34.0722	110.394	132	81	132	22	78	159	101	1	1	1	1	1	0	1	3	1	0	0	1	1	3	1	1	0	1	1	3	1	1	1	0	1	1	4	1
2	3	5	0	99	0	2	18	0	67.8	67	159	67.4	17.1172	43.274	91	61	140	45	83	58	80	1	0	0	1	0	0	0	1	0	0	0	0	0	0	0	0	0	1	0	1	0	0	0	0	0	0	0	0
5	2	5	0	99	0	1	18	0	75.3	75.2	176	75.25	18.2225	56.446	132	72	151	36	101	70	85	1	0	0	1	0	0	0	1	0	0	0	1	0	1	0	0	0	1	0	1	0	0	1	0	1	0	2	0
2	1	99	1	1	11	1	18	0	90.8	90.8	170	90.8	22.4128	64.773	123	71	124	24	75	126	86	1	0	0	1	0	0	0	1	0	0	0	1	1	2	0	1	0	1	1	3	1	0	0	0	1	1	2	0
2	3	3	0	99	4	1	18	0	78	77.4	186	77.7	17.8862	61.879	119	67	140	56	71	63	98	1	0	0	0	0	0	0	0	0	0	0	0	0	0	0	0	0	0	0	0	0	0	0	0	0	0	0	0
2	1	4	0	99	0	2	18	0	82.7	82.6	163	82.65	23.8567	63.385	112	67	108	55	43	51	101	1	1	1	0	0	0	0	1	0	0	0	0	0	0	0	0	0	0	0	0	0	0	0	0	0	0	0	0
2	3	3	0	99	17	1	18	0	78.2	79	168	78.6	21.5526	60.83	114	61	147	62	58	136	88	1	0	0	0	0	0	0	0	0	0	0	0	1	1	0	0	0	0	1	1	0	0	0	0	0	1	1	0
5	1	3	0	99	0	2	18	0	92.1	92.2	168	92.15	23.5055	66.342	110	72	119	53	52	69	92	1	0	1	0	0	0	0	0	1	0	0	0	0	1	0	1	0	0	0	1	0	1	0	0	0	0	1	0
2	3	99	0	99	0	2	18	0	70.7	70.1	162	70.4	16.595	43.552	103	72	152	50	88	68	76	1	0	0	0	0	0	0	0	0	0	0	0	0	0	0	0	0	0	0	0	0	0	0	0	0	0	0	0
4	2	3	0	99	0	2	18	0	79.4	78.8	171	79.1	22.0174	64.381	107	74	152	45	96	56	76	1	0	0	1	0	0	0	1	0	0	0	0	0	0	0	0	0	1	0	1	0	0	0	0	0	0	0	0
2	3	2	0	99	0	2	18	0	83	83.5	167	83.25	23.9743	66.862	115	65	152	39	102	56	82	1	0	1	1	0	0	0	1	0	0	0	1	0	1	0	0	0	1	0	1	0	0	0	0	1	0	1	0
2	3	5	0	99	0	2	18	0	79.5	80.3	162	79.9	18.7711	49.263	111	73	127	51	60	81	148	1	1	0	0	0	0	0	1	0	1	0	0	0	1	0	0	1	0	0	1	0	0	0	1	0	0	1	0
2	3	99	0	99	0	1	18	0	72.9	72.3	171	72.6	17.7689	51.958	119	65	157	32	102	116	101	1	1	0	1	0	0	0	2	0	0	0	1	1	2	0	0	0	1	1	2	0	0	0	0	1	1	2	0
2	3	99	0	99	0	2	18	0	73.6	73.3	151	73.45	19.9079	45.392	92	64	131	46	71	71	99	1	0	0	1	0	0	0	1	0	0	0	0	0	0	0	0	0	1	0	1	0	0	0	0	0	0	0	0
2	3	99	0	99	0	2	18	0	76	75.2	160	75.6	18.7988	48.125	94	60	189	59	116	70	78	1	0	0	0	0	0	0	0	0	0	0	0	0	0	0	0	0	0	0	0	0	0	0	0	0	0	0	0
2	1	5	0	99	0	2	18	0	85.7	86.3	158	86	23.6537	59.049	105	65	163	47	98	88	89	1	0	1	1	0	0	0	1	0	0	0	0	0	0	0	1	0	1	0	2	0	0	0	0	0	0	0	0
10	99	99	0	99	0	2	18	0	80.1	80.3	144	80.2	19.0312	39.463	105	69	132	54	63	73	97	1	0	1	0	0	0	0	0	0	0	0	0	0	0	0	0	0	0	0	0	0	0	0	0	0	0	0	0
2	3	5	0	99	8	2	18	0	83.2	83.4	167	83.3	22.7613	63.479	106	69	139	50	73	82	71	1	0	1	0	0	0	0	0	0	0	0	0	0	0	0	0	0	0	0	0	0	0	0	0	0	0	0	0
2	1	5	0	99	3	1	18	0	81	80.6	179	80.8	19.5459	62.627	124	72	124	45	63	81	130	1	1	0	0	0	0	0	1	0	1	0	0	0	1	0	0	1	0	0	1	0	0	0	1	0	0	1	0
2	3	2	0	99	0	1	18	0	76.4	76.7	168	76.55	20.5315	57.948	112	63	186	30	132	118	86	1	0	0	1	0	0	0	1	0	0	0	1	1	2	0	0	0	1	1	2	0	0	0	0	1	1	2	0
2	1	5	0	99	0	2	18	0	75.9	75.7	159	75.8	22.4121	56.66	110	69	188	59	114	76	80	1	0	0	0	0	0	0	0	0	0	0	0	0	0	0	0	0	0	0	0	0	0	0	0	0	0	0	0
2	3	5	0	99	11	2	18	0	102.2	102.5	161	102.35	28.5919	74.113	109	65	235	57	152	131	88	1	0	1	0	0	0	0	0	1	0	0	0	1	2	0	1	0	0	1	2	0	1	0	0	0	1	2	0
2	3	99	0	99	17	1	18	0	93	93	179	93	23.209	74.364	132	78	210	44	108	289	92	1	0	0	0	1	0	0	1	0	0	0	0	1	1	0	1	0	1	1	3	1	0	1	0	0	1	2	0
2	3	99	0	99	3	1	18	0	80.8	80.8	169	80.8	20.4989	58.547	122	66	158	58	88	59	89	1	0	0	0	0	0	0	0	0	0	0	0	0	0	0	0	0	0	0	0	0	0	0	0	0	0	0	0
2	2	4	0	99	4	2	18	0	67.9	68.9	150	68.4	18.5391	41.713	106	76	201	60	122	93	96	1	0	0	0	0	0	0	0	0	0	0	0	0	0	0	0	0	0	0	0	0	0	0	0	0	0	0	0
4	2	5	0	99	0	2	18	0	82	81	156	81.5	23.36	56.849	110	72	145	43	88	72	91	1	0	1	1	0	0	0	1	0	0	0	0	0	0	0	0	0	1	0	1	0	0	0	0	0	0	0	0
2	3	4	0	99	2	2	18	0	86	86.5	174	86.25	20.7105	62.703	112	68	175	62	99	68	89	1	0	1	0	0	0	0	0	0	0	0	0	0	0	0	1	0	0	0	1	0	0	0	0	0	0	0	0
2	3	3	1	0	0	2	18	0	75.4	76.2	156	75.8	20.9829	51.064	104	63	136	46	82	40	93	1	0	0	1	0	0	0	1	0	0	0	0	0	0	0	0	0	1	0	1	0	0	0	0	0	0	0	0
2	3	99	1	0	11	1	18	0	79.4	79.1	175	79.25	19.0354	58.296	99	63	200	66	115	95	83	1	0	0	0	0	0	0	0	0	0	0	0	0	0	0	0	0	0	0	0	0	0	0	0	0	0	0	0
2	3	4	0	99	0	1	18	0	85.3	85.3	164	85.3	23.3488	62.799	112	60	211	56	136	97	107	1	1	0	0	0	0	0	1	0	0	0	0	0	0	0	0	0	0	0	0	0	0	0	0	0	0	0	0
2	3	3	0	99	0	1	18	0	82.1	81.4	162	81.75	23.1047	60.636	131	74	216	54	153	45	78	1	0	0	0	0	0	0	0	0	0	0	0	0	0	0	0	0	0	0	0	0	0	1	0	0	0	1	0
2	3	4	0	99	8	1	18	0	81.8	81.8	167	81.8	20.5239	57.239	111	63	157	42	101	69	123	1	1	0	0	0	0	0	1	0	1	0	0	0	1	0	0	1	1	0	2	0	0	0	1	0	0	1	0
2	3	4	0	99	0	2	18	0	94.1	94.5	167	94.3	27.4115	76.448	118	73	133	34	53	231	96	1	0	1	1	1	0	1	2	1	0	0	1	1	3	1	1	0	1	1	3	1	1	0	0	1	1	3	1
5	1	3	0	99	9	1	18	0	87.6	87.5	174	87.55	23.9226	72.428	124	71	129	41	70	90	97	1	0	0	0	0	0	0	0	0	0	0	0	0	0	0	0	0	1	0	1	0	0	0	0	0	0	0	0
10	3	4	0	99	0	1	18	0	77.3	77.4	179	77.35	17.7488	56.869	112	65	113	46	58	44	92	1	0	0	0	0	0	0	0	0	0	0	0	0	0	0	0	0	0	0	0	0	0	0	0	0	0	0	0
2	3	4	1	0	6	1	18	0	93.2	93.8	162	93.5	27.2375	71.482	122	74	130	32	81	85	100	1	1	0	1	0	0	0	2	0	0	0	1	0	1	0	1	0	1	0	2	0	0	0	0	1	0	1	0
5	3	2	0	99	8	1	18	0	86	85.8	169	85.9	22.4218	64.039	121	73	177	55	109	66	86	1	0	0	0	0	0	0	0	0	0	0	0	0	0	0	0	0	0	0	0	0	0	0	0	0	0	0	0
9	3	2	0	99	0	2	18	0	83.7	83.5	160	83.6	24.0484	61.564	108	72	156	56	85	73	87	1	0	1	0	0	0	0	0	0	0	0	0	0	0	0	0	0	0	0	0	0	0	0	0	0	0	0	0
2	2	4	0	99	0	1	18	0	80.7	79.7	186	80.2	17.9428	62.075	108	65	164	59	90	76	92	1	0	0	0	0	0	0	0	0	0	0	0	0	0	0	0	0	0	0	0	0	0	0	0	0	0	0	0
4	3	1	0	99	7	2	18	0	69.2	69.2	162	69.2	18.2926	48.007	93	59	128	43	59	128	57	1	0	0	1	0	0	0	1	0	0	0	0	1	1	0	0	0	1	1	2	0	0	0	0	0	1	1	0
2	3	4	0	99	0	2	18	0	82.2	82.8	163	82.5	24.891	66.133	120	83	172	56	101	74	91	1	0	1	0	0	0	0	0	0	0	1	0	0	1	0	0	0	0	0	1	0	0	1	0	0	0	1	0
2	3	3	0	99	0	2	18	0	76.6	76.6	156	76.6	20.0547	48.805	118	82	121	50	63	41	85	1	0	0	0	0	0	0	0	0	0	1	0	0	1	0	0	0	0	0	1	0	0	1	0	0	0	1	0
5	3	2	0	99	0	2	18	0	73.7	73.5	160	73.6	20.2082	51.733	101	63	133	53	71	46	136	1	1	0	0	0	0	0	1	0	1	0	0	0	1	0	0	1	0	0	1	0	0	0	1	0	0	1	0
2	3	99	0	99	0	1	18	0	77.4	78.3	178	77.85	20.22	64.065	127	75	118	47	55	78	107	1	1	0	0	0	0	0	1	0	0	0	0	0	0	0	0	0	0	0	0	0	0	0	0	0	0	0	0
2	2	3	0	99	16	1	18	0	127.7	127	175	127.35	49.3091	151.009	163	98	205	49	135	106	84	1	0	1	0	0	1	0	1	1	0	1	0	0	2	0	1	0	0	1	3	1	1	1	0	0	0	2	0
2	3	5	0	99	5	1	18	0	75.5	75.9	168	75.7	20.4762	57.792	130	73	155	59	75	104	106	1	1	0	0	0	0	0	1	0	0	0	0	0	0	0	0	0	0	1	1	0	0	0	0	0	0	0	0
5	3	3	0	99	0	2	18	0	83.2	83.4	168	83.3	23.3117	65.795	108	67	166	50	105	57	95	1	0	1	0	0	0	0	0	0	0	0	0	0	0	0	0	0	0	0	0	0	0	0	0	0	0	0	0
2	3	4	0	99	0	2	18	0	90.5	90.2	154	90.35	27.2828	64.704	110	78	176	58	109	46	82	1	0	1	0	0	0	0	0	0	0	0	0	0	0	0	1	0	0	0	1	0	0	0	0	0	0	0	0
2	1	4	0	99	0	2	18	0	79.3	79.6	157	79.45	20.2361	49.88	103	71	215	59	129	135	97	1	0	0	0	0	0	0	0	0	0	0	0	1	1	0	0	0	0	1	1	0	0	0	0	0	1	1	0
2	3	5	0	99	0	1	18	0	70.8	71.4	169	71.1	17.6293	50.351	121	68	165	50	98	83	89	1	0	0	0	0	0	0	0	0	0	0	0	0	0	0	0	0	0	0	0	0	0	0	0	0	0	0	0
2	3	5	0	99	0	1	19	0	92.9	92.4	166	92.65	24.4843	67.469	121	77	157	49	96	61	90	2	0	0	0	0	0	0	0	0	0	0	0	0	0	0	1	0	0	0	1	0	0	0	0	0	0	0	0
10	2	5	0	99	4	1	18	0	78.8	79.2	173	79	20.3067	60.776	116	74	120	32	69	97	76	1	0	0	1	0	0	0	1	0	0	0	1	0	1	0	0	0	1	0	1	0	0	0	0	1	0	1	0
2	3	4	1	1	10	1	18	0	83.4	84	166	83.7	24.3479	67.093	116	70	93	38	41	68	89	1	0	0	1	0	0	0	1	0	0	0	1	0	1	0	0	0	1	0	1	0	0	0	0	1	0	1	0
2	3	5	0	99	2	2	18	0	75.9	75.6	151	75.75	20.9263	47.714	113	72	243	56	170	86	80	1	0	0	0	0	0	0	0	0	0	0	0	0	0	0	0	0	0	0	0	0	0	0	0	0	0	0	0
4	3	1	1	0	14	1	18	0	79.4	79.1	168	79.25	19.5412	55.153	113	64	141	54	74	65	77	1	0	0	0	0	0	0	0	0	0	0	0	0	0	0	0	0	0	0	0	0	0	0	0	0	0	0	0
2	1	4	0	99	0	2	18	0	81.6	81	165	81.3	19.6826	53.586	109	58	157	74	70	63	114	1	1	1	0	0	0	0	1	0	1	0	0	0	1	0	0	1	0	0	1	0	0	0	1	0	0	1	0
2	3	2	0	99	0	1	18	0	86.8	87	173	86.9	20.2229	60.525	119	71	190	54	110	128	153	1	1	0	0	0	0	0	1	0	1	0	0	1	2	0	0	1	0	1	2	0	0	0	1	0	1	2	0
2	3	4	0	99	0	1	18	0	77.1	77.5	167	77.3	20.0039	55.789	113	68	191	37	136	92	100	1	1	0	1	0	0	0	2	0	0	0	1	0	1	0	0	0	1	0	1	0	0	0	0	1	0	1	0
2	2	3	0	99	0	1	18	0	90.8	91	181	90.9	25.0392	82.031	120	70	167	31	106	150	94	1	0	0	1	1	0	0	2	0	0	0	1	1	2	0	1	0	1	1	3	1	0	0	0	1	1	2	0
2	3	3	0	99	0	2	18	0	80	79.5	160	79.75	23.6715	60.599	112	66	171	66	88	87	90	1	0	0	0	0	0	0	0	0	0	0	0	0	0	0	0	0	0	0	0	0	0	0	0	0	0	0	0
2	3	3	0	99	0	2	18	0	67.1	67.1	153	67.1	18.2934	42.823	107	73	124	54	63	36	88	1	0	0	0	0	0	0	0	0	0	0	0	0	0	0	0	0	0	0	0	0	0	0	0	0	0	0	0
2	1	99	0	99	0	2	18	0	68.7	69.4	154	69.05	18.6912	44.328	96	58	170	60	98	58	92	1	0	0	0	0	0	0	0	0	0	0	0	0	0	0	0	0	0	0	0	0	0	0	0	0	0	0	0
2	3	3	0	99	0	2	18	0	82.5	82.9	166	82.7	22.7261	62.624	114	64	169	50	107	60	132	1	1	1	0	0	0	0	1	0	1	0	0	0	1	0	0	1	0	0	1	0	0	0	1	0	0	1	0
5	3	2	0	99	0	1	18	0	74	73.9	165	73.95	17.3117	47.131	135	68	154	46	94	72	90	1	0	0	0	0	0	0	0	0	0	0	0	0	0	0	0	0	0	0	0	0	0	1	0	0	0	1	0
2	3	5	0	99	8	1	18	0	89.1	89.3	173	89.2	25.0269	74.903	135	80	224	48	160	78	112	1	1	0	0	0	0	0	1	0	1	0	0	0	1	0	1	1	0	0	2	0	0	1	1	0	0	2	0
2	1	3	0	99	0	2	18	0	68.3	69.2	146	68.75	16.8446	35.906	105	73	211	51	137	116	90	1	0	0	0	0	0	0	0	0	0	0	0	1	1	0	0	0	0	1	1	0	0	0	0	0	1	1	0
2	3	99	0	99	0	2	18	0	72.2	71.5	153	71.85	19.0213	44.527	115	77	188	52	114	108	102	1	1	0	0	0	0	0	1	0	0	0	0	0	0	0	0	0	0	1	1	0	0	0	0	0	0	0	0
2	1	4	1	0	9	1	18	0	79.3	79	170	79.15	19.8979	57.505	127	74	135	40	80	74	74	1	0	0	0	0	0	0	0	0	0	0	1	0	1	0	0	0	1	0	1	0	0	0	0	1	0	1	0
5	3	5	0	99	4	2	18	0	68.9	68.3	160	68.6	16.7305	42.83	113	86	154	48	79	135	96	1	0	0	1	0	0	0	1	0	0	0	0	1	1	0	0	0	1	1	2	0	0	1	0	0	1	2	0
2	3	5	0	99	0	2	18	0	82.7	83.2	162	82.95	20.6287	54.138	94	54	154	42	98	72	87	1	0	1	1	0	0	0	1	0	0	0	0	0	0	0	0	0	1	0	1	0	0	0	0	0	0	0	0
2	3	5	0	99	11	1	18	0	77.9	78.4	172	78.15	20.0551	59.331	108	63	136	36	83	87	78	1	0	0	1	0	0	0	1	0	0	0	1	0	1	0	0	0	1	0	1	0	0	0	0	1	0	1	0
2	3	5	0	99	0	2	18	0	76	75.8	156	75.9	19.2328	46.805	104	66	183	44	125	69	85	1	0	0	1	0	0	0	1	0	0	0	0	0	0	0	0	0	1	0	1	0	0	0	0	0	0	0	0
2	3	5	0	99	3	2	18	0	77.7	78.2	171	77.95	19.0739	55.774	100	69	154	53	86	73	89	1	0	0	0	0	0	0	0	0	0	0	0	0	0	0	0	0	0	0	0	0	0	0	0	0	0	0	0
2	3	3	0	99	23	1	18	0	70.9	70.8	170	70.85	16.4391	47.509	105	68	128	41	71	78	88	1	0	0	0	0	0	0	0	0	0	0	0	0	0	0	0	0	1	0	1	0	0	0	0	0	0	0	0
2	3	5	0	99	6	2	18	0	74.3	74.2	157	74.25	19.4405	47.919	117	82	122	38	68	81	92	1	0	0	1	0	0	0	1	0	0	0	1	0	1	0	0	0	1	0	1	0	0	1	0	1	0	2	0
2	3	5	0	99	0	1	18	0	92.6	92.2	173	92.4	25.5201	76.379	136	75	138	39	69	151	93	1	0	0	1	1	0	0	2	0	0	0	1	1	2	0	1	0	1	1	3	1	0	1	0	1	1	3	1
2	1	5	0	99	15	2	18	0	106.5	106.8	169	106.65	32.2499	92.109	109	74	213	46	134	164	94	1	0	1	1	1	0	1	2	1	0	0	0	1	2	0	1	0	1	1	3	1	1	0	0	0	1	2	0
2	3	4	0	99	0	1	18	0	87	87	182	87	23.1524	76.69	110	67	115	44	64	34	88	1	0	0	0	0	0	0	0	0	0	0	0	0	0	0	0	0	1	0	1	0	0	0	0	0	0	0	0
2	3	2	0	99	0	1	18	0	73.1	73.9	175	73.5	18.9561	58.053	119	79	95	34	47	68	84	1	0	0	1	0	0	0	1	0	0	0	1	0	1	0	0	0	1	0	1	0	0	0	0	1	0	1	0
2	3	3	0	99	0	2	18	0	75.5	75.9	162	75.7	17.95	47.108	112	77	153	58	86	44	91	1	0	0	0	0	0	0	0	0	0	0	0	0	0	0	0	0	0	0	0	0	0	0	0	0	0	0	0
4	2	3	0	99	0	2	18	0	77	76.2	166	76.6	19.7924	54.54	101	67	173	56	105	62	84	1	0	0	0	0	0	0	0	0	0	0	0	0	0	0	0	0	0	0	0	0	0	0	0	0	0	0	0
2	3	4	1	0	11	2	19	0	84	84.4	169.5	84.2	18.7109	53.757	96	70	163	47	103	67	87	2	0	1	1	0	0	0	1	0	0	0	0	0	0	0	0	0	1	0	1	0	0	0	0	0	0	0	0
5	3	99	1	0	13	2	18	0	86	86	159	86	26.694	67.485	106	66	182	41	108	167	91	1	0	1	1	1	0	1	2	0	0	0	0	1	1	0	1	0	1	1	3	1	0	0	0	0	1	1	0
2	3	5	0	99	0	1	18	0	71.5	71.6	171	71.55	16.6082	48.564	118	76	142	44	73	126	115	1	1	0	0	0	0	0	1	0	1	0	0	1	2	0	0	1	1	1	3	1	0	0	1	0	1	2	0
2	1	99	0	99	19	2	18	0	75.7	74.9	159	75.3	20.7072	52.35	106	70	145	46	81	89	92	1	0	0	1	0	0	0	1	0	0	0	0	0	0	0	0	0	1	0	1	0	0	0	0	0	0	0	0
2	3	4	0	99	0	1	18	0	77.5	78.1	183	77.8	19.5613	65.509	104	68	139	42	81	82	83	1	0	0	0	0	0	0	0	0	0	0	0	0	0	0	0	0	1	0	1	0	0	0	0	0	0	0	0
2	3	5	1	0	16	2	18	0	72.2	72.7	161	72.45	18.7419	48.581	114	72	160	56	88	80	89	1	0	0	0	0	0	0	0	0	0	0	0	0	0	0	0	0	0	0	0	0	0	0	0	0	0	0	0
5	3	1	0	99	5	1	18	0	72.7	73.2	173	72.95	19.0287	56.951	108	57	155	46	86	113	81	1	0	0	0	0	0	0	0	0	0	0	0	1	1	0	0	0	0	1	1	0	0	0	0	0	1	1	0
2	2	5	0	99	0	2	18	0	76	75	163	75.5	21.4566	57.008	116	71	125	44	69	62	122	1	1	0	1	0	0	0	2	0	1	0	0	0	1	0	0	1	1	0	2	0	0	0	1	0	0	1	0
2	3	99	1	0	0	1	18	0	82	81.5	171	81.75	21.976	64.26	102	63	132	49	74	45	93	1	0	0	0	0	0	0	0	0	0	0	0	0	0	0	0	0	0	0	0	0	0	0	0	0	0	0	0
5	3	99	0	99	0	1	18	0	88.5	88.7	172	88.6	24.6965	73.062	130	70	134	31	80	116	93	1	0	0	1	0	0	0	1	0	0	0	1	1	2	0	1	0	1	1	3	1	0	0	0	1	1	2	0
5	1	5	0	99	12	1	18	0	81.6	82.3	171	81.95	20.805	60.836	126	68	154	55	82	83	110	1	1	0	0	0	0	0	1	0	1	0	0	0	1	0	0	1	0	0	1	0	0	0	1	0	0	1	0
5	3	5	0	99	0	2	18	0	83.1	82.6	159	82.85	21.6578	54.753	116	67	247	87	132	142	112	1	1	1	0	0	0	0	1	0	1	0	0	1	2	0	0	1	0	1	2	0	0	0	1	0	1	2	0
2	3	2	0	99	0	2	18	0	75.2	75.7	169	75.45	19.9972	57.114	103	66	118	41	69	42	85	1	0	0	1	0	0	0	1	0	0	0	0	0	0	0	0	0	1	0	1	0	0	0	0	0	0	0	0
5	1	3	0	99	0	2	18	0	82.7	82.5	160	82.6	22.2687	57.008	109	74	169	46	97	129	84	1	0	1	1	0	0	0	1	0	0	0	0	1	1	0	0	0	1	1	2	0	0	0	0	0	1	1	0
2	1	5	0	99	0	2	18	0	82.5	82.8	152	82.65	21.733	50.212	107	68	127	44	64	93	90	1	0	1	1	0	0	0	1	0	0	0	0	0	0	0	0	0	1	0	1	0	0	0	0	0	0	0	0
2	2	5	0	99	0	2	18	0	98.7	98.6	164	98.65	30.0145	80.727	102	69	178	67	87	122	89	1	0	1	0	0	0	0	0	1	0	0	0	1	2	0	1	0	0	1	2	0	1	0	0	0	1	2	0
2	3	4	0	99	0	1	18	0	76	76.1	177	76.05	19.1436	59.975	114	75	158	58	84	80	84	1	0	0	0	0	0	0	0	0	0	0	0	0	0	0	0	0	0	0	0	0	0	0	0	0	0	0	0
9	3	5	0	99	0	2	18	0	76.8	76.4	150	76.6	20.2378	45.535	97	61	159	50	100	45	96	1	0	0	0	0	0	0	0	0	0	0	0	0	0	0	0	0	0	0	0	0	0	0	0	0	0	0	0
2	3	5	0	99	0	2	18	0	80.2	79.7	170	79.95	22.0685	63.778	112	67	181	45	117	97	93	1	0	0	1	0	0	0	1	0	0	0	0	0	0	0	0	0	1	0	1	0	0	0	0	0	0	0	0
2	3	4	0	99	0	2	18	0	78.4	78	170	78.2	19.6979	56.927	101	65	164	56	97	56	85	1	0	0	0	0	0	0	0	0	0	0	0	0	0	0	0	0	0	0	0	0	0	0	0	0	0	0	0
2	1	2	0	99	3	2	18	0	72.5	73.1	155	72.8	17.8864	42.972	108	76	201	55	108	189	90	1	0	0	0	1	0	0	1	0	0	0	0	1	1	0	0	0	0	1	1	0	0	0	0	0	1	1	0
2	2	5	0	99	8	1	18	0	93.3	93.3	182	93.3	23.8609	79.037	126	78	219	40	116	316	97	1	0	0	0	1	0	0	1	0	0	0	1	1	2	0	1	0	1	1	3	1	0	0	0	1	1	2	0
2	3	4	0	99	0	1	18	0	76.4	77.2	174	76.8	18.9952	57.51	119	61	253	75	153	125	85	1	0	0	0	0	0	0	0	0	0	0	0	1	1	0	0	0	0	1	1	0	0	0	0	0	1	1	0
2	3	4	0	99	0	1	18	0	83.1	83.5	174	83.3	22.1456	67.048	127	74	137	45	83	47	152	1	1	0	0	0	0	0	1	0	1	0	0	0	1	0	0	1	0	0	1	0	0	0	1	0	0	1	0
2	2	3	0	99	0	2	18	0	83.9	82.9	165	83.4	23.142	63.004	102	69	179	47	121	56	91	1	0	1	1	0	0	0	1	0	0	0	0	0	0	0	0	0	1	0	1	0	0	0	0	0	0	0	0
5	1	5	0	99	3	1	18	0	87.2	86.6	184	86.9	19.9406	67.511	120	66	182	44	108	150	92	1	0	0	0	1	0	0	1	0	0	0	0	1	1	0	0	0	1	1	2	0	0	0	0	0	1	1	0
2	3	99	0	99	9	1	18	0	83.9	83.2	184	83.55	20.2026	68.398	111	63	160	37	95	140	118	1	1	0	1	0	0	0	2	0	1	0	1	1	3	1	0	1	1	1	3	1	0	0	1	1	1	3	1
2	3	4	0	99	0	2	18	0	77	77.2	152	77.1	24.472	56.54	114	69	172	47	111	72	94	1	0	0	1	0	0	0	1	0	0	0	0	0	0	0	0	0	1	0	1	0	0	0	0	0	0	0	0
2	3	4	0	99	0	2	18	0	81.3	80.3	160	80.8	22.1645	56.741	96	66	202	45	135	109	100	1	1	1	1	0	0	1	2	0	0	0	0	0	0	0	0	0	1	1	2	0	0	0	0	0	0	0	0
2	3	5	0	99	0	2	18	0	77.2	77.5	168	77.35	22.6169	63.834	115	67	152	32	80	202	78	1	0	0	1	1	0	0	2	0	0	0	1	1	2	0	0	0	1	1	2	0	0	0	0	1	1	2	0
2	2	3	0	99	0	2	18	0	98.9	98.4	159	98.65	35.0742	88.671	122	71	179	44	122	65	92	1	0	1	1	0	0	0	1	1	0	0	0	0	1	0	1	0	1	0	2	0	1	0	0	0	0	1	0
2	3	0	0	99	8	2	18	0	84.8	84.2	162	84.5	25.6897	67.42	102	64	136	39	90	36	102	1	1	1	1	0	0	1	2	0	0	0	1	0	1	0	1	0	1	0	2	0	0	0	0	1	0	1	0
9	2	4	0	99	0	2	18	0	90.8	90.5	176	90.65	24.7065	76.531	116	71	148	65	71	60	109	1	1	1	0	0	0	0	1	0	0	0	0	0	0	0	1	0	0	0	1	0	0	0	0	0	0	0	0
2	3	1	0	99	0	2	18	0	68.3	68.8	158	68.55	17.6186	43.983	101	65	131	46	75	49	96	1	0	0	1	0	0	0	1	0	0	0	0	0	0	0	0	0	1	0	1	0	0	0	0	0	0	0	0
2	2	3	0	99	3	1	18	0	84.7	85.1	181	84.9	23.68	77.578	122	64	150	67	70	64	110	1	1	0	0	0	0	0	1	0	1	0	0	0	1	0	0	1	0	0	1	0	0	0	1	0	0	1	0
4	3	3	0	99	0	2	18	0	74.2	74.9	160	74.55	19.4023	49.67	97	63	166	48	102	78	91	1	0	0	1	0	0	0	1	0	0	0	0	0	0	0	0	0	1	0	1	0	0	0	0	0	0	0	0
2	2	2	0	99	8	1	18	0	92.4	93.4	166	92.9	24.8069	68.358	117	63	157	49	90	91	70	1	0	0	0	0	0	0	0	0	0	0	0	0	0	0	1	0	0	0	1	0	0	0	0	0	0	0	0
2	2	3	0	99	0	2	18	0	84.7	84.4	159	84.55	24.0548	60.813	104	72	110	44	52	69	76	1	0	1	1	0	0	0	1	0	0	0	0	0	0	0	1	0	1	0	2	0	0	0	0	0	0	0	0
2	3	4	0	99	0	2	18	0	75.9	74.9	158	75.4	19.9704	49.854	120	75	164	60	87	87	87	1	0	0	0	0	0	0	0	0	0	0	0	0	0	0	0	0	0	0	0	0	0	0	0	0	0	0	0
2	3	5	0	99	8	1	18	0	79.6	80	173	79.8	18.9575	56.738	121	72	131	49	70	62	85	1	0	0	0	0	0	0	0	0	0	0	0	0	0	0	0	0	0	0	0	0	0	0	0	0	0	0	0
4	1	99	0	99	0	1	18	0	80.3	79.9	181	80.1	18.5013	60.612	145	79	116	52	50	69	116	1	1	0	0	0	0	0	1	0	1	0	0	0	1	0	0	1	0	0	1	0	0	1	1	0	0	2	0
5	2	1	0	99	2	1	19	0	100	100	174	100	31.0853	94.114	127	76	181	39	117	127	89	2	0	1	1	0	0	0	1	1	0	0	1	1	3	1	1	0	1	1	3	1	1	0	0	1	1	3	1
10	3	2	0	99	0	1	18	0	91.2	90.9	178	91.05	25.8105	81.778	135	73	159	44	96	96	105	1	1	0	0	0	0	0	1	0	0	0	0	0	0	0	1	0	1	0	2	0	0	1	0	0	0	1	0
2	3	3	1	0	5	1	19	0	82.4	81.8	174	82.1	20.8429	63.104	109	66	148	39	76	165	89	2	0	0	1	1	0	0	2	0	0	0	1	1	2	0	0	0	1	1	2	0	0	0	0	1	1	2	0
4	3	99	0	99	0	1	18	0	75.5	75.8	178	75.65	19.3574	61.332	111	65	168	53	97	89	86	1	0	0	0	0	0	0	0	0	0	0	0	0	0	0	0	0	0	0	0	0	0	0	0	0	0	0	0
5	2	3	0	99	0	2	18	0	76.7	76.8	163	76.75	21.2778	56.533	116	80	161	51	95	73	90	1	0	0	0	0	0	0	0	0	0	0	0	0	0	0	0	0	0	0	0	0	0	1	0	0	0	1	0
2	2	4	1	1	15	1	18	0	120.7	120.7	190	120.7	37.6731	136	167	93	203	40	129	171	87	1	0	1	0	1	1	1	2	1	0	1	1	1	4	1	1	0	1	1	4	1	1	1	0	1	1	4	1
10	2	3	0	99	7	1	18	0	114.5	114.8	177	114.65	34.7493	108.866	129	74	206	50	131	126	100	1	1	1	0	0	0	0	1	1	0	0	0	1	2	0	1	0	0	1	2	0	1	0	0	0	1	2	0
2	2	4	0	99	0	1	18	0	87.6	86.6	170	87.1	24.2619	70.117	119	71	215	54	146	73	89	1	0	0	0	0	0	0	0	0	0	0	0	0	0	0	0	0	0	0	0	0	0	0	0	0	0	0	0
2	3	5	0	99	1	1	18	0	80.8	80.7	177	80.75	21.6735	67.901	122	70	137	46	85	28	90	1	0	0	0	0	0	0	0	0	0	0	0	0	0	0	0	0	0	0	0	0	0	0	0	0	0	0	0
2	2	99	0	99	0	1	18	0	78.3	78.5	183	78.4	18.2681	61.178	100	51	119	36	72	57	87	1	0	0	1	0	0	0	1	0	0	0	1	0	1	0	0	0	1	0	1	0	0	0	0	1	0	1	0
10	3	99	0	99	0	1	18	0	84	83.1	180	83.55	19.8593	64.344	125	69	135	38	77	101	76	1	0	0	1	0	0	0	1	0	0	0	1	0	1	0	0	0	1	1	2	0	0	0	0	1	0	1	0
2	3	5	0	99	0	2	18	0	70.1	71.1	169	70.6	18.3712	52.47	97	67	167	54	102	56	90	1	0	0	0	0	0	0	0	0	0	0	0	0	0	0	0	0	0	0	0	0	0	0	0	0	0	0	0
2	3	5	0	99	0	1	18	0	79.6	78.8	172	79.2	19.9412	58.994	100	52	122	43	64	76	102	1	1	0	0	0	0	0	1	0	0	0	0	0	0	0	0	0	1	0	1	0	0	0	0	0	0	0	0
9	2	4	0	99	0	2	18	0	89.9	90.7	158	90.3	27.6005	68.902	109	66	113	56	45	62	87	1	0	1	0	0	0	0	0	0	0	0	0	0	0	0	1	0	0	0	1	0	0	0	0	0	0	0	0
2	3	99	0	99	0	2	18	0	89.3	89.3	163	89.3	26.654	70.817	114	82	191	41	127	117	95	1	0	1	1	0	0	0	1	0	0	0	0	1	1	0	1	0	1	1	3	1	0	1	0	0	1	2	0
2	1	4	0	99	0	2	18	0	80.6	79.9	149	80.25	23.73	52.683	117	80	175	46	111	90	108	1	1	1	1	0	0	1	2	0	0	0	0	0	0	0	0	0	1	0	1	0	0	1	0	0	0	1	0
5	2	2	0	99	0	2	18	0	74	74.7	166	74.35	20.1521	55.531	113	72	182	61	108	65	73	1	0	0	0	0	0	0	0	0	0	0	0	0	0	0	0	0	0	0	0	0	0	0	0	0	0	0	0
2	3	4	0	99	0	2	18	0	74	74.2	162	74.1	20.4317	53.621	97	65	188	59	109	99	86	1	0	0	0	0	0	0	0	0	0	0	0	0	0	0	0	0	0	0	0	0	0	0	0	0	0	0	0
2	1	4	0	99	8	1	18	0	95.7	96.4	171	96.05	25.6414	74.978	129	73	213	51	121	203	95	1	0	1	0	1	0	0	1	1	0	0	0	1	2	0	1	0	0	1	2	0	1	0	0	0	1	2	0
2	1	4	0	99	4	2	18	0	73.6	73.4	156	73.5	20.4368	49.735	99	65	116	56	52	41	74	1	0	0	0	0	0	0	0	0	0	0	0	0	0	0	0	0	0	0	0	0	0	0	0	0	0	0	0
2	3	99	0	99	0	1	18	0	87.5	88.2	176	87.85	21.8443	67.665	114	68	133	35	88	52	109	1	1	0	1	0	0	0	2	0	0	0	1	0	1	0	1	0	1	0	2	0	0	0	0	1	0	1	0
2	3	4	0	99	0	2	18	0	71.1	71.2	166	71.15	17.0729	47.046	96	67	170	50	108	58	102	1	1	0	0	0	0	0	1	0	0	0	0	0	0	0	0	0	0	0	0	0	0	0	0	0	0	0	0
5	1	99	0	99	0	2	18	0	89.3	88.6	163	88.95	27.4997	73.064	116	73	117	38	66	65	96	1	0	1	1	0	0	0	1	0	0	0	1	0	1	0	1	0	1	0	2	0	0	0	0	1	0	1	0
2	3	99	0	99	0	1	18	0	75.3	75.1	174	75.2	18.8119	56.955	121	63	126	64	49	64	112	1	1	0	0	0	0	0	1	0	1	0	0	0	1	0	0	1	0	0	1	0	0	0	1	0	0	1	0
2	3	4	0	99	3	1	18	0	76.9	77.5	176	77.2	16.9899	52.628	115	63	143	59	63	103	86	1	0	0	0	0	0	0	0	0	0	0	0	0	0	0	0	0	0	1	1	0	0	0	0	0	0	0	0
2	3	99	0	99	0	2	18	0	89.9	89.7	163	89.8	26.9254	71.538	124	66	152	40	99	67	97	1	0	1	1	0	0	0	1	0	0	0	1	0	1	0	1	0	1	0	2	0	0	0	0	1	0	1	0
2	3	2	0	99	3	2	18	0	77.8	77.1	152	77.45	22.5121	52.012	111	78	187	77	99	56	75	1	0	0	0	0	0	0	0	0	0	0	0	0	0	0	0	0	0	0	0	0	0	0	0	0	0	0	0
2	2	4	0	99	0	2	18	0	78.4	79	162	78.7	20.234	53.102	102	68	171	55	101	77	94	1	0	0	0	0	0	0	0	0	0	0	0	0	0	0	0	0	0	0	0	0	0	0	0	0	0	0	0
2	1	2	0	99	0	1	18	0	76.7	77.3	178	77	18.9111	59.918	120	78	146	51	80	75	95	1	0	0	0	0	0	0	0	0	0	0	0	0	0	0	0	0	0	0	0	0	0	0	0	0	0	0	0
2	3	3	0	99	5	2	18	0	74.7	74.1	146	74.4	22.8401	48.686	104	71	221	58	125	192	89	1	0	0	0	1	0	0	1	0	0	0	0	1	1	0	0	0	0	1	1	0	0	0	0	0	1	1	0
5	3	5	0	99	0	2	18	0	82.1	83	164	82.55	24.3111	65.387	105	66	144	55	80	47	76	1	0	1	0	0	0	0	0	0	0	0	0	0	0	0	0	0	0	0	0	0	0	0	0	0	0	0	0
2	2	99	0	99	1	1	18	0	84.2	84.7	186	84.45	21.445	74.191	122	73	182	50	117	73	86	1	0	0	0	0	0	0	0	0	0	0	0	0	0	0	0	0	0	0	0	0	0	0	0	0	0	0	0
9	2	99	0	99	3	1	18	0	81.4	80.9	179	81.15	20.4981	65.678	113	61	149	50	88	53	49	1	0	0	0	0	0	0	0	0	0	0	0	0	0	0	0	0	0	0	0	0	0	0	0	0	0	0	0
5	2	4	0	99	0	1	18	0	84.4	84.3	174	84.35	23.3802	70.786	125	67	177	34	117	128	143	1	1	0	1	0	0	0	2	0	1	0	1	1	3	1	0	1	1	1	3	1	0	0	1	1	1	3	1
2	2	3	0	99	0	2	18	0	89.9	89.7	167	89.8	27.0379	75.406	104	69	134	75	43	80	133	1	1	1	0	0	0	0	1	0	1	0	0	0	1	0	1	1	0	0	2	0	0	0	1	0	0	1	0
2	1	4	0	99	0	2	18	0	84.5	85.1	160	84.8	24.9824	63.955	126	71	158	56	79	116	81	1	0	1	0	0	0	0	0	0	0	0	0	1	1	0	1	0	0	1	2	0	0	0	0	0	1	1	0
9	2	4	0	99	0	2	18	0	72.1	72.4	164	72.25	16.4731	44.306	98	71	201	79	109	63	87	1	0	0	0	0	0	0	0	0	0	0	0	0	0	0	0	0	0	0	0	0	0	0	0	0	0	0	0
9	2	3	0	99	0	2	18	0	73.1	72.8	161	72.95	19.3793	50.233	109	70	139	48	81	51	93	1	0	0	1	0	0	0	1	0	0	0	0	0	0	0	0	0	1	0	1	0	0	0	0	0	0	0	0
1	3	99	0	99	0	1	18	0	71.8	71.7	172	71.75	16.9825	50.241	111	72	130	46	65	96	99	1	0	0	0	0	0	0	0	0	0	0	0	0	0	0	0	0	0	0	0	0	0	0	0	0	0	0	0
2	3	4	1	1	13	2	18	0	76.8	77.4	154	77.1	21.4572	50.888	109	77	157	41	91	127	92	1	0	0	1	0	0	0	1	0	0	0	0	1	1	0	0	0	1	1	2	0	0	0	0	0	1	1	0
2	2	3	1	1	12	1	18	0	93.9	94.9	166	94.4	24.9017	68.619	123	77	230	49	149	160	94	1	0	1	0	1	0	0	1	0	0	0	0	1	1	0	1	0	0	1	2	0	0	0	0	0	1	1	0
4	3	4	1	0	0	2	18	0	74.9	75.6	165	75.25	19.9188	54.229	104	67	156	51	91	72	99	1	0	0	0	0	0	0	0	0	0	0	0	0	0	0	0	0	0	0	0	0	0	0	0	0	0	0	0
2	3	5	0	99	0	2	18	0	79.2	79.8	166	79.5	18.9563	52.236	104	69	93	31	46	82	86	1	0	0	1	0	0	0	1	0	0	0	1	0	1	0	0	0	1	0	1	0	0	0	0	1	0	1	0
2	1	5	0	99	0	1	18	0	75.9	76.9	187	76.4	18.5358	64.818	119	64	114	41	61	58	95	1	0	0	0	0	0	0	0	0	0	0	0	0	0	0	0	0	1	0	1	0	0	0	0	0	0	0	0
2	3	4	0	99	1	2	19	0	86.5	86.1	155	86.3	27.3349	65.672	92	58	214	44	152	92	87	2	0	1	1	0	0	0	1	0	0	0	0	0	0	0	1	0	1	0	2	0	0	0	0	0	0	0	0
2	3	3	1	1	10	1	18	0	71.4	71.4	170	71.4	15.7706	45.577	97	62	143	47	86	50	88	1	0	0	0	0	0	0	0	0	0	0	0	0	0	0	0	0	0	0	0	0	0	0	0	0	0	0	0
9	2	2	0	99	0	2	18	0	85.2	84.7	167	84.95	27.3696	76.331	115	63	148	53	85	51	102	1	1	1	0	0	0	0	1	0	0	0	0	0	0	0	1	0	0	0	1	0	0	0	0	0	0	0	0
2	2	4	0	99	0	2	18	0	68.4	69.3	158	68.85	19.0386	47.528	99	57	172	73	77	110	94	1	0	0	0	0	0	0	0	0	0	0	0	1	1	0	0	0	0	1	1	0	0	0	0	0	1	1	0
2	3	5	0	99	15	2	18	0	76.5	75.5	159	76	21.8559	55.254	104	67	171	48	112	54	76	1	0	0	1	0	0	0	1	0	0	0	0	0	0	0	0	0	1	0	1	0	0	0	0	0	0	0	0
5	1	2	0	99	0	2	18	0	77.6	78.4	160	78	19.9879	51.169	105	70	143	54	79	50	94	1	0	0	0	0	0	0	0	0	0	0	0	0	0	0	0	0	0	0	0	0	0	0	0	0	0	0	0
5	2	99	0	99	0	2	18	0	75	75	153	75	21.0244	49.216	107	65	188	56	110	112	94	1	0	0	0	0	0	0	0	0	0	0	0	1	1	0	0	0	0	1	1	0	0	0	0	0	1	1	0
2	3	3	0	99	0	1	18	0	91.2	90.4	171	90.8	24.0259	70.254	110	67	215	51	144	99	90	1	0	0	0	0	0	0	0	0	0	0	0	0	0	0	1	0	0	0	1	0	0	0	0	0	0	0	0
5	3	4	0	99	0	2	18	0	71.9	70.9	162	71.4	19.249	50.517	97	64	157	55	89	67	122	1	1	0	0	0	0	0	1	0	1	0	0	0	1	0	0	1	0	0	1	0	0	0	1	0	0	1	0
2	3	3	0	99	0	1	18	0	85.3	85.6	171.5	85.45	23.2539	68.395	115	70	144	56	71	83	105	1	1	0	0	0	0	0	1	0	0	0	0	0	0	0	0	0	0	0	0	0	0	0	0	0	0	0	0
5	3	4	0	99	0	2	18	0	90.1	90.4	156	90.25	28.8548	70.221	130	76	214	46	137	153	85	1	0	1	1	1	0	1	2	0	0	0	0	1	1	0	1	0	1	1	3	1	0	0	0	0	1	1	0
2	3	3	0	99	0	2	18	0	70.2	70.3	153	70.25	19.6907	46.094	112	73	170	48	97	123	71	1	0	0	1	0	0	0	1	0	0	0	0	1	1	0	0	0	1	1	2	0	0	0	0	0	1	1	0
5	1	99	0	99	0	2	19	0	91.5	92	166	91.75	28.5343	78.629	114	72	225	42	153	149	86	2	0	1	1	0	0	0	1	1	0	0	0	1	2	0	1	0	1	1	3	1	1	0	0	0	1	2	0
2	3	4	0	99	0	1	18	0	86.1	86.3	180	86.2	21.7994	70.63	103	53	120	45	63	60	80	1	0	0	0	0	0	0	0	0	0	0	0	0	0	0	0	0	0	0	0	0	0	0	0	0	0	0	0
2	3	5	0	99	0	2	18	0	74.4	74.6	161	74.5	18.3207	47.489	104	64	144	54	81	47	108	1	1	0	0	0	0	0	1	0	0	0	0	0	0	0	0	0	0	0	0	0	0	0	0	0	0	0	0
2	3	2	0	99	0	1	18	0	82.5	82	164	82.25	21.1143	56.789	123	79	149	43	81	126	86	1	0	0	0	0	0	0	0	0	0	0	0	1	1	0	0	0	1	1	2	0	0	0	0	0	1	1	0
2	3	4	0	99	0	1	18	0	77.1	76.2	170	76.65	19.8875	57.475	111	66	139	36	80	117	86	1	0	0	1	0	0	0	1	0	0	0	1	1	2	0	0	0	1	1	2	0	0	0	0	1	1	2	0
2	1	5	0	99	0	2	18	0	78.5	77.5	151	78	19.9925	45.585	110	68	152	58	83	53	130	1	1	0	0	0	0	0	1	0	1	0	0	0	1	0	0	1	0	0	1	0	0	0	1	0	0	1	0
2	3	3	0	99	0	2	18	0	85.1	85	157	85.05	23.3153	57.47	105	68	114	31	67	78	91	1	0	1	1	0	0	0	1	0	0	0	1	0	1	0	1	0	1	0	2	0	0	0	0	1	0	1	0
2	3	5	0	99	0	1	18	0	76.2	76.7	178	76.45	18.0517	57.195	125	73	139	38	48	267	101	1	1	0	1	1	0	0	3	0	0	0	1	1	2	0	0	0	1	1	2	0	0	0	0	1	1	2	0
4	3	2	0	99	4	1	18	0	95.9	95.8	175	95.85	26.1577	80.108	129	75	160	60	86	69	142	1	1	1	0	0	0	0	1	1	1	0	0	0	2	0	1	1	0	0	2	0	1	0	1	0	0	2	0
2	2	4	0	99	0	2	18	0	73	72.4	167	72.7	18.7647	52.333	108	66	163	53	101	46	95	1	0	0	0	0	0	0	0	0	0	0	0	0	0	0	0	0	0	0	0	0	0	0	0	0	0	0	0
2	3	4	0	99	0	2	18	0	103.9	103	153	103.45	36.1844	84.704	132	79	219	31	135	267	96	1	0	1	1	1	0	1	2	1	0	1	1	1	4	1	1	0	1	1	4	1	1	1	0	1	1	4	1
2	3	5	0	99	0	1	18	0	89.9	90.3	174	90.1	24.3094	73.599	134	89	198	41	120	187	87	1	0	0	0	1	1	0	2	0	0	0	0	1	1	0	1	0	1	1	3	1	0	1	0	0	1	2	0
10	3	99	0	99	8	1	18	0	74.3	74.4	168	74.35	19.206	54.207	106	51	110	38	60	58	87	1	0	0	1	0	0	0	1	0	0	0	1	0	1	0	0	0	1	0	1	0	0	0	0	1	0	1	0
2	1	5	0	99	0	2	18	0	98.3	98.2	159	98.25	32.2104	81.431	111	78	165	38	96	156	96	1	0	1	1	1	0	1	2	1	0	0	1	1	3	1	1	0	1	1	3	1	1	0	0	1	1	3	1
4	3	3	0	99	0	2	18	0	79.2	79.6	158	79.4	22.6354	56.507	104	69	137	48	78	55	93	1	0	0	1	0	0	0	1	0	0	0	0	0	0	0	0	0	1	0	1	0	0	0	0	0	0	0	0
2	3	3	0	99	0	1	18	0	92.6	92.9	170	92.75	27.4792	79.415	124	86	130	46	74	51	79	1	0	0	0	0	0	0	0	0	0	0	0	0	0	0	1	0	0	0	1	0	0	1	0	0	0	1	0
2	3	2	0	99	0	1	18	0	76.6	76.9	179	76.75	18.7688	60.137	142	81	145	51	82	58	104	1	1	0	0	0	0	0	1	0	0	0	0	0	0	0	0	0	0	0	0	0	0	1	0	0	0	1	0
2	3	4	0	99	0	1	18	0	84.9	84.8	167	84.85	24.5706	68.525	112	79	140	34	78	138	94	1	0	0	1	0	0	0	1	0	0	0	1	1	2	0	0	0	1	1	2	0	0	0	0	1	1	2	0
4	2	5	0	99	0	2	18	0	67.3	66.7	165	67	16.3669	44.559	101	68	158	60	85	63	92	1	0	0	0	0	0	0	0	0	0	0	0	0	0	0	0	0	0	0	0	0	0	0	0	0	0	0	0
2	3	99	0	99	0	2	18	0	60.9	61.1	153	61	15.6662	36.673	109	71	182	61	106	76	78	1	0	0	0	0	0	0	0	0	0	0	0	0	0	0	0	0	0	0	0	0	0	0	0	0	0	0	0
10	3	99	0	99	0	1	18	0	93.7	94.3	173	94	25.4218	76.085	137	73	181	61	104	80	96	1	0	1	0	0	0	0	0	0	0	0	0	0	0	0	1	0	0	0	1	0	0	1	0	0	0	1	0
4	3	2	0	99	0	2	18	0	90.5	91.2	155	90.85	29.4589	70.775	132	83	226	50	149	135	105	1	1	1	0	0	0	0	1	0	0	1	0	1	2	0	1	0	0	1	3	1	0	1	0	0	1	2	0
2	2	3	1	0	0	1	18	0	83.5	83.5	169	83.5	23.0776	65.912	124	76	170	41	110	93	113	1	1	0	0	0	0	0	1	0	1	0	0	0	1	0	0	1	1	0	2	0	0	0	1	0	0	1	0
4	3	5	0	99	3	2	18	0	81	82	160	81.5	23.343	59.758	116	66	146	44	89	67	93	1	0	1	1	0	0	0	1	0	0	0	0	0	0	0	0	0	1	0	1	0	0	0	0	0	0	0	0
2	1	2	0	99	4	2	18	0	84.4	83.7	160	84.05	25.0164	64.042	111	69	154	49	88	84	77	1	0	1	1	0	0	0	1	0	0	0	0	0	0	0	0	0	1	0	1	0	0	0	0	0	0	0	0
2	99	99	0	99	0	1	18	0	92	91.7	166	91.85	26.0092	71.671	138	76	196	41	123	160	102	1	1	0	0	1	0	0	2	0	0	0	0	1	1	0	1	0	1	1	3	1	0	1	0	0	1	2	0
2	3	5	0	99	0	2	18	0	76.4	76.2	165	76.3	19.622	53.421	115	75	155	38	95	111	92	1	0	0	1	0	0	0	1	0	0	0	1	1	2	0	0	0	1	1	2	0	0	0	0	1	1	2	0
10	3	4	0	99	10	1	18	0	81.7	81.5	175	81.6	20.9806	64.253	121	75	130	44	75	57	83	1	0	0	0	0	0	0	0	0	0	0	0	0	0	0	0	0	1	0	1	0	0	0	0	0	0	0	0
5	2	5	0	99	0	2	18	0	84	84.8	164	84.4	25.7046	69.135	117	74	215	54	129	160	98	1	0	1	0	1	0	0	1	0	0	0	0	1	1	0	0	0	0	1	1	0	0	0	0	0	1	1	0
2	2	99	0	99	8	1	18	0	82.4	82.5	177	82.45	21.2318	66.517	121	81	157	67	69	107	86	1	0	0	0	0	0	0	0	0	0	0	0	0	0	0	0	0	0	1	1	0	0	1	0	0	0	1	0
2	1	5	1	0	0	2	18	0	83.5	84.5	163	84	23.028	61.183	104	65	191	44	124	117	131	1	1	1	1	0	0	1	2	0	1	0	0	1	2	0	0	1	1	1	3	1	0	0	1	0	1	2	0
5	1	5	0	99	2	1	18	0	101.5	102	177	101.75	30.4884	95.517	114	68	127	28	59	201	95	1	0	1	1	1	0	1	2	1	0	0	1	1	3	1	1	0	1	1	3	1	1	0	0	1	1	3	1
2	3	1	0	99	2	2	18	0	72.2	73.2	163	72.7	18.3364	48.718	109	74	151	50	79	111	86	1	0	0	0	0	0	0	0	0	0	0	0	1	1	0	0	0	0	1	1	0	0	0	0	0	1	1	0
5	2	4	0	99	0	1	18	0	75.6	76.6	169	76.1	19.2735	55.047	133	83	144	30	85	143	78	1	0	0	1	0	0	0	1	0	0	1	1	1	3	1	0	0	1	1	3	1	0	1	0	1	1	3	1
5	3	5	0	99	1	1	18	0	89.9	89.1	166	89.5	26.8047	73.863	127	77	242	35	142	324	145	1	1	0	1	1	0	0	3	0	1	0	1	1	3	1	1	1	1	1	4	1	0	0	1	1	1	3	1
2	3	5	0	99	7	2	18	0	81.5	81.6	163	81.55	21.227	56.398	103	68	149	34	103	62	87	1	0	1	1	0	0	0	1	0	0	0	1	0	1	0	0	0	1	0	1	0	0	0	0	1	0	1	0
2	1	4	0	99	9	2	18	0	90.2	90.6	150	90.4	26.0991	58.723	101	61	146	47	86	65	81	1	0	1	1	0	0	0	1	0	0	0	0	0	0	0	1	0	1	0	2	0	0	0	0	0	0	0	0
9	1	4	0	99	0	2	18	0	74.3	74.9	164	74.6	21.4493	57.69	125	70	126	46	100	62	100	1	1	0	1	0	0	0	2	0	0	0	0	0	0	0	0	0	1	0	1	0	0	0	0	0	0	0	0
1	3	4	0	99	0	2	18	0	101.3	101.2	151	101.25	33.624	76.666	113	80	232	36	171	126	83	1	0	1	1	0	0	0	1	1	0	0	1	1	3	1	1	0	1	1	3	1	1	1	0	1	1	4	1
2	1	2	0	99	0	1	18	0	92	91.4	176	91.7	22.2911	69.049	142	79	148	28	64	279	139	1	1	0	1	1	0	0	3	0	1	0	1	1	3	1	1	1	1	1	4	1	0	1	1	1	1	4	1
2	3	4	0	99	0	2	18	0	78.4	79	160	78.7	19.7258	50.498	118	75	139	63	62	69	101	1	1	0	0	0	0	0	1	0	0	0	0	0	0	0	0	0	0	0	0	0	0	0	0	0	0	0	0
2	3	4	0	99	6	2	18	0	83.3	84	160.5	83.65	23.1923	59.744	109	66	146	65	62	94	70	1	0	1	0	0	0	0	0	0	0	0	0	0	0	0	0	0	0	0	0	0	0	0	0	0	0	0	0
2	1	4	0	99	13	1	18	0	87.6	87.5	174	87.55	25.7326	77.908	129	79	191	37	109	226	91	1	0	0	1	1	0	0	2	0	0	0	1	1	2	0	0	0	1	1	2	0	0	0	0	1	1	2	0
4	3	4	0	99	15	1	18	0	81.2	80.7	156	80.95	22.7087	55.264	115	66	180	48	112	101	88	1	0	0	0	0	0	0	0	0	0	0	0	0	0	0	0	0	0	1	1	0	0	0	0	0	0	0	0
4	3	4	1	0	0	1	18	0	76.8	76.9	177	76.85	18.8847	59.164	110	76	131	50	65	78	93	1	0	0	0	0	0	0	0	0	0	0	0	0	0	0	0	0	0	0	0	0	0	0	0	0	0	0	0
2	3	3	0	99	0	1	19	0	75.4	74.9	168	75.15	19.1341	54.004	112	67	148	41	96	57	78	2	0	0	0	0	0	0	0	0	0	0	0	0	0	0	0	0	1	0	1	0	0	0	0	0	0	0	0
2	3	4	0	99	0	2	18	0	70.5	70.3	161	70.4	19.6061	50.821	112	75	179	61	96	112	93	1	0	0	0	0	0	0	0	0	0	0	0	1	1	0	0	0	0	1	1	0	0	0	0	0	1	1	0
2	2	4	0	99	3	2	18	0	78.3	78.6	163	78.45	19.4204	51.598	104	63	170	48	89	163	90	1	0	0	1	1	0	0	2	0	0	0	0	1	1	0	0	0	1	1	2	0	0	0	0	0	1	1	0
9	3	5	0	99	0	2	18	0	75	76.5	160	75.75	21.1723	54.201	105	60	154	58	82	70	89	1	0	0	0	0	0	0	0	0	0	0	0	0	0	0	0	0	0	0	0	0	0	0	0	0	0	0	0
2	3	5	0	99	0	2	18	0	77.9	78.1	150	78	20.8604	46.936	101	66	195	60	116	93	90	1	0	0	0	0	0	0	0	0	0	0	0	0	0	0	0	0	0	0	0	0	0	0	0	0	0	0	0
2	3	5	0	99	0	2	18	0	74.7	75.5	148	75.1	21.5741	47.256	116	76	181	40	118	114	107	1	1	0	1	0	0	0	2	0	0	0	1	1	2	0	0	0	1	1	2	0	0	0	0	1	1	2	0
4	3	4	0	99	11	2	18	0	80.6	79.9	158	80.25	21.2666	53.09	101	64	162	73	75	69	114	1	1	1	0	0	0	0	1	0	1	0	0	0	1	0	0	1	0	0	1	0	0	0	1	0	0	1	0
2	1	2	0	99	0	1	18	0	78.8	78.6	182	78.7	17.9779	59.55	121	76	124	50	61	67	86	1	0	0	0	0	0	0	0	0	0	0	0	0	0	0	0	0	0	0	0	0	0	0	0	0	0	0	0
2	3	4	0	99	4	1	19	0	97.6	97.8	175	97.7	26.2491	80.388	126	75	145	45	88	61	95	2	0	1	0	0	0	0	0	1	0	0	0	0	1	0	1	0	0	0	1	0	1	0	0	0	0	1	0
2	3	5	0	99	0	2	18	0	78.3	78.2	157	78.25	22.2265	54.786	105	73	155	39	103	67	94	1	0	0	1	0	0	0	1	0	0	0	1	0	1	0	0	0	1	0	1	0	0	0	0	1	0	1	0
2	3	5	0	99	0	2	18	0	86.1	85.6	159	85.85	21.0019	53.095	94	59	133	51	68	71	110	1	1	1	0	0	0	0	1	0	1	0	0	0	1	0	1	1	0	0	2	0	0	0	1	0	0	1	0
2	3	99	0	99	8	1	18	0	88.4	88.8	169	88.6	25.1714	71.892	120	74	170	45	108	84	126	1	1	0	0	0	0	0	1	0	1	0	0	0	1	0	1	1	0	0	2	0	0	0	1	0	0	1	0
2	3	99	0	99	7	1	18	0	99.2	99	180	99.1	26.4349	85.649	126	72	187	41	122	121	116	1	1	1	0	0	0	0	1	1	1	0	0	1	3	1	1	1	1	1	4	1	1	0	1	0	1	3	1
4	3	99	0	99	5	2	18	0	70.9	70.7	149	70.8	18.2622	40.544	104	63	130	41	77	58	103	1	1	0	1	0	0	0	2	0	0	0	0	0	0	0	0	0	1	0	1	0	0	0	0	0	0	0	0
5	1	2	0	99	0	1	18	0	96.2	96.8	167	96.5	27.7228	77.316	133	74	139	29	64	228	92	1	0	1	1	1	0	1	2	1	0	0	1	1	3	1	1	0	1	1	3	1	1	1	0	1	1	4	1
2	3	4	0	99	7	1	18	0	72	72.4	169	72.2	17.249	49.265	107	63	123	39	69	77	96	1	0	0	1	0	0	0	1	0	0	0	1	0	1	0	0	0	1	0	1	0	0	0	0	1	0	1	0
4	2	4	0	99	0	2	18	0	82.8	82.7	174	82.75	21.9857	66.564	108	77	151	55	82	72	95	1	0	1	0	0	0	0	0	0	0	0	0	0	0	0	0	0	0	0	0	0	0	0	0	0	0	0	0
2	3	4	0	99	0	2	18	0	78.9	78.9	162	78.9	24.2273	63.582	99	62	165	47	107	53	93	1	0	0	1	0	0	0	1	0	0	0	0	0	0	0	0	0	1	0	1	0	0	0	0	0	0	0	0
2	3	5	0	99	0	2	18	0	100.2	100.5	164	100.35	30.7812	82.789	123	86	202	37	137	139	88	1	0	1	1	0	0	0	1	1	0	1	1	1	4	1	1	0	1	1	4	1	1	1	0	1	1	4	1
2	1	4	0	99	0	1	18	0	74.6	75.6	166	75.1	18.899	52.078	117	61	110	35	55	100	108	1	1	0	1	0	0	0	2	0	0	0	1	0	1	0	0	0	1	1	2	0	0	0	0	1	0	1	0
2	3	5	0	99	7	2	18	0	80.3	79.6	158	79.95	22.3786	55.866	110	74	158	46	99	67	100	1	1	0	1	0	0	0	2	0	0	0	0	0	0	0	0	0	1	0	1	0	0	0	0	0	0	0	0
2	3	99	0	99	1	1	18	0	73.6	74.1	169	73.85	17.102	48.845	106	61	143	52	77	72	86	1	0	0	0	0	0	0	0	0	0	0	0	0	0	0	0	0	0	0	0	0	0	0	0	0	0	0	0
2	3	99	0	99	6	2	18	0	75.7	76.6	162	76.15	19.8499	52.094	101	70	173	38	105	148	95	1	0	0	1	0	0	0	1	0	0	0	1	1	2	0	0	0	1	1	2	0	0	0	0	1	1	2	0
2	2	4	0	99	0	1	18	0	84.1	85.1	186	84.6	22.6942	78.513	123	64	117	27	55	175	71	1	0	0	1	1	0	0	2	0	0	0	1	1	2	0	0	0	1	1	2	0	0	0	0	1	1	2	0
2	3	2	1	1	11	1	18	0	78.6	77.6	178	78.1	18.8414	59.697	110	72	198	55	124	95	87	1	0	0	0	0	0	0	0	0	0	0	0	0	0	0	0	0	0	0	0	0	0	0	0	0	0	0	0
2	3	4	0	99	12	2	18	0	71.4	70.8	154	71.1	19.7023	46.726	106	78	168	54	105	44	95	1	0	0	0	0	0	0	0	0	0	0	0	0	0	0	0	0	0	0	0	0	0	0	0	0	0	0	0
2	3	4	0	99	7	2	18	0	67.8	68.3	164	68.05	16.9713	45.646	104	64	114	45	58	53	119	1	1	0	1	0	0	0	2	0	1	0	0	0	1	0	0	1	1	0	2	0	0	0	1	0	0	1	0
2	3	3	0	99	0	1	18	0	82.2	82.1	184	82.15	19.0442	64.476	115	75	118	52	56	49	130	1	1	0	0	0	0	0	1	0	1	0	0	0	1	0	0	1	0	0	1	0	0	0	1	0	0	1	0
2	3	5	0	99	0	1	18	0	76.7	76.7	170	76.7	19.3474	55.914	125	85	127	51	64	58	100	1	1	0	0	0	0	0	1	0	0	0	0	0	0	0	0	0	0	0	0	0	0	1	0	0	0	1	0
2	3	4	0	99	0	1	18	0	82.7	81.9	165	82.3	21.8399	59.459	115	70	159	70	73	80	84	1	0	0	0	0	0	0	0	0	0	0	0	0	0	0	0	0	0	0	0	0	0	0	0	0	0	0	0
2	3	4	0	99	0	2	18	0	78	78.1	162	78.05	21.0269	55.183	110	75	158	40	105	66	97	1	0	0	1	0	0	0	1	0	0	0	1	0	1	0	0	0	1	0	1	0	0	0	0	1	0	1	0
2	3	5	0	99	5	2	18	0	69.8	69.3	151	69.55	18.4667	42.106	100	63	202	58	124	102	82	1	0	0	0	0	0	0	0	0	0	0	0	0	0	0	0	0	0	1	1	0	0	0	0	0	0	0	0
2	2	4	0	99	0	2	18	0	93.1	92.3	162	92.7	31.2319	81.965	125	81	139	29	91	93	77	1	0	1	1	0	0	0	1	1	0	1	1	0	3	1	1	0	1	0	3	1	1	1	0	1	0	3	1
2	3	3	0	99	6	1	18	0	105.5	105	168	105.25	30.0184	84.724	120	71	179	44	112	114	82	1	0	1	0	0	0	0	0	1	0	0	0	1	2	0	1	0	1	1	3	1	1	0	0	0	1	2	0
2	2	99	0	99	0	2	18	0	75.4	76.1	148	75.75	20.1662	44.172	114	77	181	38	103	198	106	1	1	0	1	1	0	0	3	0	0	0	1	1	2	0	0	0	1	1	2	0	0	0	0	1	1	2	0
2	3	4	0	99	6	1	18	0	78.8	79.1	160	78.95	22.1656	56.744	112	62	152	41	90	106	117	1	1	0	0	0	0	0	1	0	1	0	0	0	1	0	0	1	1	1	3	1	0	0	1	0	0	1	0
2	1	5	0	99	0	1	18	0	81	81.4	167	81.2	22.2471	62.045	125	68	125	45	69	54	97	1	0	0	0	0	0	0	0	0	0	0	0	0	0	0	0	0	0	0	0	0	0	0	0	0	0	0	0
5	3	3	0	99	0	1	18	0	81.3	81.5	179	81.4	19.3115	61.876	116	77	182	62	96	122	85	1	0	0	0	0	0	0	0	0	0	0	0	1	1	0	0	0	0	1	1	0	0	0	0	0	1	1	0
5	3	1	0	99	0	1	18	0	96.2	97.1	177	96.65	27.6447	86.608	117	59	142	38	87	84	86	1	0	1	1	0	0	0	1	1	0	0	1	0	2	0	1	0	1	0	2	0	1	0	0	1	0	2	0
2	1	5	0	99	0	1	18	0	94.6	94	176	94.3	26.5635	82.283	116	77	134	30	85	95	103	1	1	1	1	0	0	1	2	0	0	0	1	0	1	0	1	0	1	0	2	0	0	0	0	1	0	1	0
2	3	4	1	1	16	1	18	0	74.9	75	180	74.95	18.5799	60.199	113	73	147	51	84	59	94	1	0	0	0	0	0	0	0	0	0	0	0	0	0	0	0	0	0	0	0	0	0	0	0	0	0	0	0
2	3	0	0	99	0	1	18	0	98.7	99.1	170	98.9	27.7107	80.084	120	72	169	56	96	83	98	1	0	1	0	0	0	0	0	1	0	0	0	0	1	0	1	0	0	0	1	0	1	0	0	0	0	1	0
9	1	2	0	99	2	2	18	0	73.2	73.8	161	73.5	18.34	47.539	103	67	133	68	56	46	96	1	0	0	0	0	0	0	0	0	0	0	0	0	0	0	0	0	0	0	0	0	0	0	0	0	0	0	0
2	2	3	0	99	0	1	18	0	91.2	91.2	168	91.2	26.8803	75.867	115	75	151	48	90	66	84	1	0	0	0	0	0	0	0	0	0	0	0	0	0	0	1	0	0	0	1	0	0	0	0	0	0	0	0
2	3	2	0	99	0	1	18	0	70.3	71.2	160	70.75	18.468	47.278	108	71	115	43	58	70	95	1	0	0	0	0	0	0	0	0	0	0	0	0	0	0	0	0	1	0	1	0	0	0	0	0	0	0	0
2	3	4	0	99	6	2	18	0	72.9	73.1	158	73	18.1569	45.327	100	59	143	47	86	49	92	1	0	0	1	0	0	0	1	0	0	0	0	0	0	0	0	0	1	0	1	0	0	0	0	0	0	0	0
2	3	5	0	99	0	1	18	0	102.8	102.4	175	102.6	31.072	95.158	131	86	127	33	63	153	89	1	0	1	1	1	1	1	3	1	0	0	1	1	3	1	1	0	1	1	3	1	1	1	0	1	1	4	1
2	3	4	0	99	0	1	18	0	78.6	78.4	171	78.5	18.3684	53.711	112	71	138	38	82	92	110	1	1	0	1	0	0	0	2	0	1	0	1	0	2	0	0	1	1	0	2	0	0	0	1	1	0	2	0
10	3	4	0	99	0	2	18	0	78.2	78	160	78.1	18.4332	47.189	107	71	162	59	87	80	87	1	0	0	0	0	0	0	0	0	0	0	0	0	0	0	0	0	0	0	0	0	0	0	0	0	0	0	0
2	3	5	0	99	0	1	18	0	90.3	90.5	176	90.4	23.3032	72.184	114	58	139	45	80	72	89	1	0	0	0	0	0	0	0	0	0	0	0	0	0	0	1	0	0	0	1	0	0	0	0	0	0	0	0
5	3	2	0	99	0	1	18	0	83.9	84.8	173	84.35	22.2223	66.509	136	65	182	45	109	141	101	1	1	0	0	0	0	0	1	0	0	0	0	1	1	0	0	0	0	1	1	0	0	1	0	0	1	2	0
2	1	0	1	0	10	2	18	0	98.5	99.4	163	98.95	31.6621	84.123	112	84	171	38	95	190	91	1	0	1	1	1	0	1	2	1	0	0	1	1	3	1	1	0	1	1	3	1	1	1	0	1	1	4	1
2	3	4	0	99	0	2	18	0	93.7	94.1	175	93.9	24.9202	76.318	121	71	129	30	73	130	80	1	0	1	1	0	0	0	1	1	0	0	1	1	3	1	1	0	1	1	3	1	1	0	0	1	1	3	1
2	1	2	0	99	0	1	18	0	80.6	81.1	177	80.85	21.3144	66.776	124	67	200	53	124	117	86	1	0	0	0	0	0	0	0	0	0	0	0	1	1	0	0	0	0	1	1	0	0	0	0	0	1	1	0
10	3	3	0	99	0	1	18	0	85.8	85.1	175	85.45	21.7551	66.625	135	79	130	47	72	55	93	1	0	0	0	0	0	0	0	0	0	0	0	0	0	0	0	0	0	0	0	0	0	1	0	0	0	1	0
10	1	3	0	99	12	1	18	0	82.5	83	196	82.75	18.927	72.71	113	69	105	36	52	84	94	1	0	0	1	0	0	0	1	0	0	0	1	0	1	0	0	0	1	0	1	0	0	0	0	1	0	1	0
2	1	2	1	0	0	2	18	0	76.2	76.5	165	76.35	19.3568	52.699	117	80	143	63	71	47	85	1	0	0	0	0	0	0	0	0	0	0	0	0	0	0	0	0	0	0	0	0	0	1	0	0	0	1	0
2	2	3	0	99	0	2	18	0	82.1	81.2	159	81.65	21.8856	55.329	99	71	204	55	136	65	84	1	0	1	0	0	0	0	0	0	0	0	0	0	0	0	0	0	0	0	0	0	0	0	0	0	0	0	0
2	3	99	0	99	0	1	18	0	78	77.4	172	77.7	19.7363	58.388	109	66	152	50	92	48	103	1	1	0	0	0	0	0	1	0	0	0	0	0	0	0	0	0	0	0	0	0	0	0	0	0	0	0	0
2	3	4	0	99	7	1	18	0	95.3	96	174	95.65	25.7425	77.938	125	60	156	32	85	195	82	1	0	1	1	1	0	1	2	1	0	0	1	1	3	1	1	0	1	1	3	1	1	0	0	1	1	3	1
2	2	3	0	99	1	1	18	0	87.3	87.8	180	87.55	23.5963	76.452	133	82	153	42	101	51	92	1	0	0	0	0	0	0	0	0	0	0	0	0	0	0	0	0	1	0	1	0	0	1	0	0	0	1	0
5	3	5	0	99	0	1	18	0	78.2	77.8	162	78	20.3307	53.356	117	71	170	40	110	99	98	1	0	0	0	0	0	0	0	0	0	0	1	0	1	0	0	0	1	0	1	0	0	0	0	1	0	1	0
2	1	4	0	99	0	2	18	0	90	89.8	153	89.9	30.6801	71.819	110	52	180	49	116	74	91	1	0	1	1	0	0	0	1	0	0	0	0	0	0	0	1	0	1	0	2	0	0	0	0	0	0	0	0
2	1	4	0	99	0	2	18	0	90	89.2	166	89.6	25.4268	70.066	123	77	118	40	58	102	93	1	0	1	1	0	0	0	1	0	0	0	1	0	1	0	1	0	1	1	3	1	0	0	0	1	0	1	0
2	3	4	0	99	7	1	18	0	80	80.2	171.5	80.1	20.7845	61.132	128	70	169	51	96	109	95	1	0	0	0	0	0	0	0	0	0	0	0	0	0	0	0	0	0	1	1	0	0	0	0	0	0	0	0
2	3	5	0	99	5	2	18	0	84.4	83.9	154	84.15	24.9195	59.099	118	72	157	36	107	72	81	1	0	1	1	0	0	0	1	0	0	0	1	0	1	0	0	0	1	0	1	0	0	0	0	1	0	1	0
5	3	3	0	99	0	1	18	0	73.3	73.2	169	73.25	18.4878	52.803	110	62	160	44	106	52	106	1	1	0	0	0	0	0	1	0	0	0	0	0	0	0	0	0	1	0	1	0	0	0	0	0	0	0	0
1	3	99	0	99	16	1	18	0	90	89.1	166	89.55	23.5321	64.845	111	69	149	42	76	156	77	1	0	0	0	1	0	0	1	0	0	0	0	1	1	0	1	0	1	1	3	1	0	0	0	0	1	1	0
2	3	4	0	99	0	1	18	0	71.1	71.2	163	71.15	18.5039	49.163	112	67	136	53	67	79	92	1	0	0	0	0	0	0	0	0	0	0	0	0	0	0	0	0	0	0	0	0	0	0	0	0	0	0	0
2	1	1	0	99	6	1	18	0	99.8	100.6	170	100.2	29.6349	85.645	123	68	146	35	92	95	86	1	0	1	1	0	0	0	1	1	0	0	1	0	2	0	1	0	1	0	2	0	1	0	0	1	0	2	0
9	3	2	0	99	11	1	18	0	74.2	75.1	169	74.65	21.3109	60.866	126	68	166	43	108	76	91	1	0	0	0	0	0	0	0	0	0	0	0	0	0	0	0	0	1	0	1	0	0	0	0	0	0	0	0
9	3	2	0	99	1	1	18	0	80	80.1	171	80.05	20.8926	61.092	121	71	117	29	77	54	93	1	0	0	1	0	0	0	1	0	0	0	1	0	1	0	0	0	1	0	1	0	0	0	0	1	0	1	0
2	3	2	0	99	6	2	18	0	97.6	98.2	153	97.9	36.5462	85.551	110	75	121	38	70	63	81	1	0	1	1	0	0	0	1	1	0	0	1	0	2	0	1	0	1	0	2	0	1	0	0	1	0	2	0
10	3	5	0	99	10	1	18	0	75.6	74.8	170	75.2	19.7765	57.154	108	64	146	65	64	83	92	1	0	0	0	0	0	0	0	0	0	0	0	0	0	0	0	0	0	0	0	0	0	0	0	0	0	0	0
2	2	4	0	99	11	2	18	0	64.7	64.5	158	64.6	18.1958	45.424	111	78	140	53	75	58	73	1	0	0	0	0	0	0	0	0	0	0	0	0	0	0	0	0	0	0	0	0	0	0	0	0	0	0	0
2	3	99	0	99	0	1	18	0	77.7	77.8	168	77.75	21.1129	59.589	120	58	95	38	44	65	97	1	0	0	1	0	0	0	1	0	0	0	1	0	1	0	0	0	1	0	1	0	0	0	0	1	0	1	0
2	3	5	0	99	0	2	18	0	71	71.9	152	71.45	18.8283	43.501	124	83	208	67	120	104	97	1	0	0	0	0	0	0	0	0	0	1	0	0	1	0	0	0	0	1	2	0	0	1	0	0	0	1	0
2	3	4	0	99	0	1	18	0	78.5	78.6	165	78.55	19.8659	54.085	109	68	159	44	103	61	89	1	0	0	0	0	0	0	0	0	0	0	0	0	0	0	0	0	1	0	1	0	0	0	0	0	0	0	0
2	2	5	0	99	0	1	18	0	90.7	90.1	176	90.4	23.8669	73.93	116	56	132	54	61	87	84	1	0	0	0	0	0	0	0	0	0	0	0	0	0	0	1	0	0	0	1	0	0	0	0	0	0	0	0
2	2	4	0	99	0	2	18	0	74.4	74.8	168	74.6	16.9108	47.729	99	66	181	64	106	53	143	1	1	0	0	0	0	0	1	0	1	0	0	0	1	0	0	1	0	0	1	0	0	0	1	0	0	1	0
2	2	5	0	99	0	1	18	0	91.4	90.9	173	91.15	26.9197	80.568	132	78	191	78	102	55	99	1	0	0	0	0	0	0	0	0	0	0	0	0	0	0	1	0	0	0	1	0	0	1	0	0	0	1	0
2	3	4	0	99	0	1	18	0	77.3	77.2	183	77.25	18.2045	60.965	112	60	132	42	54	178	88	1	0	0	0	1	0	0	1	0	0	0	0	1	1	0	0	0	1	1	2	0	0	0	0	0	1	1	0
5	1	5	0	99	2	2	18	0	87.1	87.2	158	87.15	25.9422	64.762	117	77	224	66	135	113	91	1	0	1	0	0	0	0	0	0	0	0	0	1	1	0	1	0	0	1	2	0	0	0	0	0	1	1	0
2	1	4	0	99	0	2	18	0	76.1	75.7	163	75.9	16.9457	45.023	82	57	194	80	96	90	84	1	0	0	0	0	0	0	0	0	0	0	0	0	0	0	0	0	0	0	0	0	0	0	0	0	0	0	0
2	3	99	1	0	7	2	18	0	80.6	81	160	80.8	22.973	58.811	106	70	170	69	92	46	88	1	0	1	0	0	0	0	0	0	0	0	0	0	0	0	0	0	0	0	0	0	0	0	0	0	0	0	0
2	3	4	0	99	6	1	18	0	74.4	74	172	74.2	18.5394	54.847	125	76	152	42	88	112	119	1	1	0	0	0	0	0	1	0	1	0	0	1	2	0	0	1	1	1	3	1	0	0	1	0	1	2	0
2	3	5	0	99	3	2	18	0	67.6	66.8	150	67.2	15.56	35.01	98	62	166	47	102	86	91	1	0	0	1	0	0	0	1	0	0	0	0	0	0	0	0	0	1	0	1	0	0	0	0	0	0	0	0
2	3	2	0	99	4	1	18	0	73.2	73	179	73.1	17.8787	57.285	118	64	140	51	82	36	93	1	0	0	0	0	0	0	0	0	0	0	0	0	0	0	0	0	0	0	0	0	0	0	0	0	0	0	0
2	2	3	0	99	0	1	18	0	89.3	89.9	178	89.6	23.783	75.354	124	80	207	48	138	107	125	1	1	0	0	0	0	0	1	0	1	0	0	0	1	0	1	1	0	1	3	1	0	1	1	0	0	2	0
2	1	2	1	1	16	1	18	0	110.5	110	178	110.25	32.5218	103.042	136	81	219	38	140	204	93	1	0	1	1	1	0	1	2	1	0	0	1	1	3	1	1	0	1	1	3	1	1	1	0	1	1	4	1
2	3	99	0	99	4	1	18	0	72.4	72.8	181	72.6	16.3573	53.588	111	68	128	54	65	44	106	1	1	0	0	0	0	0	1	0	0	0	0	0	0	0	0	0	0	0	0	0	0	0	0	0	0	0	0
2	2	5	0	99	0	2	18	0	72.8	72.8	164	72.8	20.6737	55.604	123	79	225	52	157	80	118	1	1	0	0	0	0	0	1	0	1	0	0	0	1	0	0	1	0	0	1	0	0	0	1	0	0	1	0
2	3	5	0	99	6	2	18	0	69.8	69.5	166	69.65	15.5407	42.824	117	76	156	63	79	69	98	1	0	0	0	0	0	0	0	0	0	0	0	0	0	0	0	0	0	0	0	0	0	0	0	0	0	0	0
2	3	5	0	99	11	2	18	0	86.9	87.4	165	87.15	22.6663	61.709	104	73	176	43	108	123	76	1	0	1	1	0	0	0	1	0	0	0	0	1	1	0	1	0	1	1	3	1	0	0	0	0	1	1	0
5	3	4	0	99	0	1	18	0	77.6	76.8	173	77.2	19.6782	58.895	113	74	198	76	111	53	80	1	0	0	0	0	0	0	0	0	0	0	0	0	0	0	0	0	0	0	0	0	0	0	0	0	0	0	0
2	3	3	0	99	0	1	18	0	107	106.7	172	106.85	32.259	95.435	136	77	172	48	99	124	92	1	0	1	0	0	0	0	0	1	0	0	0	1	2	0	1	0	0	1	2	0	1	1	0	0	1	3	1
2	3	99	0	99	6	2	18	0	83.3	83.9	162	83.6	23.6747	62.132	114	77	122	67	35	101	93	1	0	1	0	0	0	0	0	0	0	0	0	0	0	0	0	0	0	1	1	0	0	0	0	0	0	0	0
2	3	99	0	99	0	1	18	0	84.5	84.3	164	84.4	24.1605	64.982	123	77	127	41	68	90	82	1	0	0	0	0	0	0	0	0	0	0	0	0	0	0	0	0	1	0	1	0	0	0	0	0	0	0	0
5	3	2	0	99	1	2	18	0	65.5	66	163	65.75	16.1843	43	104	63	158	62	86	52	113	1	1	0	0	0	0	0	1	0	1	0	0	0	1	0	0	1	0	0	1	0	0	0	1	0	0	1	0
2	99	99	0	99	0	2	18	0	67.1	67	155	67.05	16.3813	39.356	113	69	178	59	106	65	102	1	1	0	0	0	0	0	1	0	0	0	0	0	0	0	0	0	0	0	0	0	0	0	0	0	0	0	0
2	3	99	1	0	0	1	18	0	85.6	85.6	172	85.6	22.3526	66.128	131	76	178	44	107	133	100	1	1	0	0	0	0	0	1	0	0	0	0	1	1	0	0	0	1	1	2	0	0	1	0	0	1	2	0
2	1	99	0	99	12	1	18	0	71.2	70.3	168	70.75	16.6086	46.876	109	68	95	35	50	50	79	1	0	0	1	0	0	0	1	0	0	0	1	0	1	0	0	0	1	0	1	0	0	0	0	1	0	1	0
2	3	5	0	99	0	1	18	0	101.6	101.9	176	101.75	27.9161	86.473	126	69	129	38	79	59	122	1	1	1	1	0	0	1	2	1	1	0	1	0	3	1	1	1	1	0	3	1	1	0	1	1	0	3	1
2	3	4	0	99	0	2	18	0	75	75	158	75	20.2748	50.614	116	82	157	63	79	76	89	1	0	0	0	0	0	0	0	0	0	0	0	0	0	0	0	0	0	0	0	0	0	1	0	0	0	1	0
2	1	99	1	0	7	1	18	0	100.7	100.9	175	100.8	28.2756	86.594	130	73	172	22	112	188	96	1	0	1	1	1	0	1	2	1	0	0	1	1	3	1	1	0	1	1	3	1	1	0	0	1	1	3	1
2	3	4	0	99	6	2	18	0	70.1	69.9	177	70	16.2463	50.898	102	69	168	57	95	81	105	1	1	0	0	0	0	0	1	0	0	0	0	0	0	0	0	0	0	0	0	0	0	0	0	0	0	0	0
2	3	5	0	99	0	1	18	0	81.1	81.5	175	81.3	19.1709	58.711	112	73	116	33	64	96	89	1	0	0	1	0	0	0	1	0	0	0	1	0	1	0	0	0	1	0	1	0	0	0	0	1	0	1	0
2	3	5	0	99	0	2	18	0	83.3	84.1	156	83.7	23.5696	57.359	125	67	151	50	91	49	92	1	0	1	0	0	0	0	0	0	0	0	0	0	0	0	0	0	0	0	0	0	0	0	0	0	0	0	0
2	3	3	0	99	7	1	18	0	92.4	92.3	167	92.35	28.7877	80.286	142	88	224	29	61	672	94	1	0	0	1	1	1	0	3	0	0	1	1	1	3	1	1	0	1	1	4	1	0	1	0	1	1	3	1
2	3	99	0	99	0	1	18	0	75.7	76.2	170	75.95	17.846	51.575	112	57	111	39	56	81	98	1	0	0	1	0	0	0	1	0	0	0	1	0	1	0	0	0	1	0	1	0	0	0	0	1	0	1	0
2	2	4	0	99	0	1	19	0	82	82.1	176	82.05	21.0327	65.151	126	80	156	53	78	125	86	2	0	0	0	0	0	0	0	0	0	0	0	1	1	0	0	0	0	1	1	0	0	1	0	0	1	2	0
2	3	4	1	0	0	1	18	0	81.4	82.1	168	81.75	22.9043	64.645	111	69	175	49	98	141	63	1	0	0	0	0	0	0	0	0	0	0	0	1	1	0	0	0	0	1	1	0	0	0	0	0	1	1	0
2	2	3	0	99	6	2	19	0	74.7	74.7	159	74.7	19.9731	50.494	97	71	133	32	100	97	85	2	0	0	1	0	0	0	1	0	0	0	1	0	1	0	0	0	1	0	1	0	0	0	0	1	0	1	0
2	1	4	0	99	3	1	18	0	76.5	76.5	168	76.5	20.0521	56.595	115	70	159	35	106	91	97	1	0	0	1	0	0	0	1	0	0	0	1	0	1	0	0	0	1	0	1	0	0	0	0	1	0	1	0
2	2	4	0	99	0	1	18	0	105.3	105.5	188	105.4	27.236	96.263	171	91	154	44	99	55	119	1	1	1	0	0	1	1	2	1	1	1	0	0	3	1	1	1	1	0	4	1	1	1	1	0	0	3	1
2	3	2	0	99	7	2	18	0	90.2	90.8	164	90.5	25.248	67.907	109	69	133	38	80	73	98	1	0	1	1	0	0	0	1	0	0	0	1	0	1	0	1	0	1	0	2	0	0	0	0	1	0	1	0
4	3	4	0	99	15	1	18	0	74.4	75.1	172	74.75	18.918	55.967	119	66	110	41	49	100	114	1	1	0	0	0	0	0	1	0	1	0	0	0	1	0	0	1	1	1	3	1	0	0	1	0	0	1	0
5	2	5	0	99	0	2	18	0	85.1	85.3	159	85.2	25.2672	63.878	108	67	219	57	148	69	83	1	0	1	0	0	0	0	0	0	0	0	0	0	0	0	1	0	0	0	1	0	0	0	0	0	0	0	0
2	3	3	1	0	12	2	18	0	87.2	87.2	174	87.2	21.2465	64.326	116	78	135	34	75	132	118	1	1	1	1	0	0	1	2	0	1	0	1	1	3	1	1	1	1	1	4	1	0	0	1	1	1	3	1
10	3	3	0	99	2	2	18	0	83.3	83.7	156	83.5	24.6466	59.98	105	66	143	48	77	89	92	1	0	1	1	0	0	0	1	0	0	0	0	0	0	0	0	0	1	0	1	0	0	0	0	0	0	0	0
2	1	1	0	99	0	2	18	0	69.3	68.9	159	69.1	16.8684	42.645	94	61	143	73	58	60	89	1	0	0	0	0	0	0	0	0	0	0	0	0	0	0	0	0	0	0	0	0	0	0	0	0	0	0	0
2	3	2	0	99	12	2	18	0	74	74.6	161	74.3	20.2322	52.444	100	67	157	60	86	57	81	1	0	0	0	0	0	0	0	0	0	0	0	0	0	0	0	0	0	0	0	0	0	0	0	0	0	0	0
2	3	4	0	99	0	1	18	0	79.1	79.1	165	79.1	19.5372	53.19	123	80	155	45	90	98	83	1	0	0	0	0	0	0	0	0	0	0	0	0	0	0	0	0	0	0	0	0	0	1	0	0	0	1	0
2	3	4	0	99	0	2	18	0	83.6	83.1	155	83.35	21.5159	51.692	110	75	188	51	119	92	92	1	0	1	0	0	0	0	0	0	0	0	0	0	0	0	0	0	0	0	0	0	0	0	0	0	0	0	0
2	3	5	1	0	0	2	18	0	76.5	77.3	150	76.9	20.9209	47.072	100	66	134	45	72	87	96	1	0	0	1	0	0	0	1	0	0	0	0	0	0	0	0	0	1	0	1	0	0	0	0	0	0	0	0
2	3	5	1	0	15	2	18	0	81.6	81.5	161	81.55	20.3939	52.863	103	65	131	43	75	64	132	1	1	1	1	0	0	1	2	0	1	0	0	0	1	0	0	1	1	0	2	0	0	0	1	0	0	1	0
2	3	4	0	99	0	2	18	0	77.5	77.6	160	77.55	18.4832	47.317	105	73	208	52	137	96	105	1	1	0	0	0	0	0	1	0	0	0	0	0	0	0	0	0	0	0	0	0	0	0	0	0	0	0	0
3	3	4	0	99	0	2	18	0	77.7	77.8	161	77.75	21.7762	56.446	110	66	151	61	79	57	94	1	0	0	0	0	0	0	0	0	0	0	0	0	0	0	0	0	0	0	0	0	0	0	0	0	0	0	0
2	3	4	0	99	0	2	18	0	80.7	80.3	158	80.5	22.5877	56.388	126	79	166	50	98	91	88	1	0	1	0	0	0	0	0	0	0	1	0	0	1	0	0	0	0	0	1	0	0	0	0	0	0	0	0
2	3	4	0	99	0	2	18	0	69.4	69.2	156	69.3	19.2517	46.851	93	60	156	50	92	70	71	1	0	0	0	0	0	0	0	0	0	0	0	0	0	0	0	0	0	0	0	0	0	0	0	0	0	0	0
2	3	4	0	99	0	2	18	0	84.9	83.9	149	84.4	26.2853	58.356	105	67	173	39	109	125	87	1	0	1	1	0	0	0	1	0	0	0	1	1	2	0	0	0	1	1	2	0	0	0	0	1	1	2	0
4	3	5	1	0	9	1	18	0	80.3	80.5	170	80.4	20.2986	58.663	107	64	105	37	48	102	86	1	0	0	1	0	0	0	1	0	0	0	1	0	1	0	0	0	1	1	2	0	0	0	0	1	0	1	0
9	1	3	0	99	3	2	18	0	87.5	87.3	165	87.4	25.4854	69.384	108	67	153	48	92	65	101	1	1	1	1	0	0	1	2	0	0	0	0	0	0	0	1	0	1	0	2	0	0	0	0	0	0	0	0
2	3	4	0	99	0	1	18	0	73	74	171	73.5	16.2727	47.583	123	75	181	66	103	61	129	1	1	0	0	0	0	0	1	0	1	0	0	0	1	0	0	1	0	0	1	0	0	0	1	0	0	1	0
9	3	2	0	99	0	2	18	0	85.3	85.6	160	85.45	26.4836	67.798	116	78	260	65	142	267	72	1	0	1	0	1	0	0	1	0	0	0	0	1	1	0	1	0	0	1	2	0	0	0	0	0	1	1	0
9	3	99	0	99	0	2	18	0	83	82.5	168	82.75	19.9996	56.447	95	61	142	52	79	54	117	1	1	1	0	0	0	0	1	0	1	0	0	0	1	0	0	1	0	0	1	0	0	0	1	0	0	1	0
1	3	2	0	99	0	2	18	0	72.4	72.7	162	72.55	18.6492	48.943	91	61	123	49	66	42	84	1	0	0	1	0	0	0	1	0	0	0	0	0	0	0	0	0	1	0	1	0	0	0	0	0	0	0	0
2	1	99	0	99	0	1	18	0	98.9	99	171	98.95	27.8315	81.382	121	75	221	44	130	237	90	1	0	1	0	1	0	0	1	1	0	0	0	1	2	0	1	0	1	1	3	1	1	0	0	0	1	2	0
2	3	5	0	99	7	2	18	0	85.2	85.4	166	85.3	22.7127	62.587	98	61	138	47	78	63	86	1	0	1	1	0	0	0	1	0	0	0	0	0	0	0	1	0	1	0	2	0	0	0	0	0	0	0	0
2	1	5	0	99	0	1	18	0	85.3	85.6	186	85.45	22.4413	77.638	130	75	145	34	60	256	74	1	0	0	1	1	0	0	2	0	0	0	1	1	2	0	0	0	1	1	2	0	0	0	0	1	1	2	0
2	1	3	1	0	14	1	18	0	83.2	82.9	173	83.05	20.8664	62.451	123	70	198	42	129	134	103	1	1	0	0	0	0	0	1	0	0	0	0	1	1	0	0	0	1	1	2	0	0	0	0	0	1	1	0
2	3	4	0	99	0	2	19	0	86.1	86.8	158	86.45	24.9828	62.367	104	64	169	35	114	100	121	2	1	1	1	0	0	1	2	0	1	0	1	0	2	0	1	1	1	1	4	1	0	0	1	1	0	2	0
2	3	4	0	99	0	1	18	0	87	86.4	178	86.7	23.3676	74.038	113	62	121	46	55	100	84	1	0	0	0	0	0	0	0	0	0	0	0	0	0	0	0	0	0	1	1	0	0	0	0	0	0	0	0
2	1	4	0	99	12	2	18	0	81.4	81	168	81.2	21.3889	60.368	108	75	167	36	112	94	91	1	0	1	1	0	0	0	1	0	0	0	1	0	1	0	0	0	1	0	1	0	0	0	0	1	0	1	0
2	3	5	0	99	0	2	18	0	92	92.2	168	92.1	24.8891	70.247	133	84	220	73	130	87	80	1	0	1	0	0	0	0	0	1	0	1	0	0	2	0	1	0	0	0	2	0	1	1	0	0	0	2	0
2	3	99	0	99	8	1	18	0	82.2	81.3	174	81.75	20.2705	61.371	123	67	118	38	67	68	87	1	0	0	1	0	0	0	1	0	0	0	1	0	1	0	0	0	1	0	1	0	0	0	0	1	0	1	0
2	3	5	0	99	14	1	18	0	83.5	84	174	83.75	23.1167	69.988	115	65	157	61	80	80	91	1	0	0	0	0	0	0	0	0	0	0	0	0	0	0	0	0	0	0	0	0	0	0	0	0	0	0	0
2	3	5	0	99	0	1	18	0	75.9	75.3	171	75.6	21.5123	62.904	127	81	129	46	67	79	121	1	1	0	0	0	0	0	1	0	1	0	0	0	1	0	0	1	0	0	1	0	0	1	1	0	0	2	0
2	1	5	0	99	6	2	18	0	80.8	80.6	159	80.7	22.3638	56.538	100	67	188	58	105	123	77	1	0	1	0	0	0	0	0	0	0	0	0	1	1	0	0	0	0	1	1	0	0	0	0	0	1	1	0
2	3	99	0	99	21	1	18	0	79.4	80.1	178	79.75	23.0893	73.156	124	74	118	64	46	38	86	1	0	0	0	0	0	0	0	0	0	0	0	0	0	0	0	0	0	0	0	0	0	0	0	0	0	0	0
2	2	3	0	99	0	1	18	0	76.2	76	175	76.1	18.8865	57.84	119	70	127	43	70	71	90	1	0	0	0	0	0	0	0	0	0	0	0	0	0	0	0	0	1	0	1	0	0	0	0	0	0	0	0
9	1	2	0	99	0	2	18	0	70.8	71.2	163	71	18.1313	48.173	93	55	110	48	53	46	84	1	0	0	1	0	0	0	1	0	0	0	0	0	0	0	0	0	1	0	1	0	0	0	0	0	0	0	0
5	1	1	0	99	6	2	18	0	85.3	85.6	153	85.45	29.4083	68.842	102	61	163	76	69	90	82	1	0	1	0	0	0	0	0	0	0	0	0	0	0	0	1	0	0	0	1	0	0	0	0	0	0	0	0
2	3	0	0	99	0	2	18	0	79.7	79.7	162	79.7	22.6799	59.521	119	77	129	51	67	53	98	1	0	0	0	0	0	0	0	0	0	0	0	0	0	0	0	0	0	0	0	0	0	0	0	0	0	0	0
5	1	0	0	99	0	2	18	0	84.4	85	160	84.7	24.3453	62.324	110	68	187	74	94	95	82	1	0	1	0	0	0	0	0	0	0	0	0	0	0	0	1	0	0	0	1	0	0	0	0	0	0	0	0
9	1	1	0	99	0	2	18	0	80.7	81.4	170	81.05	21.7692	62.913	113	58	211	65	135	53	81	1	0	1	0	0	0	0	0	0	0	0	0	0	0	0	0	0	0	0	0	0	0	0	0	0	0	0	0
5	3	5	0	99	0	2	18	0	73.1	72.7	163	72.9	18.997	50.473	109	77	148	44	77	137	103	1	1	0	1	0	0	0	2	0	0	0	0	1	1	0	0	0	1	1	2	0	0	0	0	0	1	1	0
2	3	5	0	99	0	1	18	0	77.2	77.5	174	77.35	19.7282	59.729	117	82	192	54	117	104	97	1	0	0	0	0	0	0	0	0	0	0	0	0	0	0	0	0	0	1	1	0	0	1	0	0	0	1	0
2	2	5	0	99	0	2	18	0	75.3	75.7	158	75.5	20.9626	52.331	111	68	195	72	109	69	88	1	0	0	0	0	0	0	0	0	0	0	0	0	0	0	0	0	0	0	0	0	0	0	0	0	0	0	0
2	1	2	0	99	10	1	18	0	81.7	81.3	176	81.5	21.015	65.096	137	79	161	37	95	144	86	1	0	0	1	0	0	0	1	0	0	0	1	1	2	0	0	0	1	1	2	0	0	1	0	1	1	3	1
2	3	3	0	99	0	2	18	0	71	71.2	162	71.1	18.243	47.877	110	66	158	68	72	88	87	1	0	0	0	0	0	0	0	0	0	0	0	0	0	0	0	0	0	0	0	0	0	0	0	0	0	0	0
2	2	4	0	99	0	2	18	0	68.9	68.5	151	68.7	18.272	41.662	106	71	159	67	83	43	86	1	0	0	0	0	0	0	0	0	0	0	0	0	0	0	0	0	0	0	0	0	0	0	0	0	0	0	0
2	3	3	1	0	4	2	19	0	73.6	73.2	164.4	73.4	17.3746	46.959	99	68	152	59	82	55	86	2	0	0	0	0	0	0	0	0	0	0	0	0	0	0	0	0	0	0	0	0	0	0	0	0	0	0	0
9	3	4	0	99	0	2	18	0	69.7	69.9	151	69.8	19.382	44.193	97	69	140	56	63	105	98	1	0	0	0	0	0	0	0	0	0	0	0	0	0	0	0	0	0	1	1	0	0	0	0	0	0	0	0
9	3	0	0	99	3	2	18	0	69.8	69.3	149	69.55	18.805	41.749	117	64	137	60	70	33	97	1	0	0	0	0	0	0	0	0	0	0	0	0	0	0	0	0	0	0	0	0	0	0	0	0	0	0	0
10	1	3	0	99	0	1	18	0	88.9	89.1	174	89	22.5218	68.187	118	79	156	42	100	70	93	1	0	0	0	0	0	0	0	0	0	0	0	0	0	0	1	0	1	0	2	0	0	0	0	0	0	0	0
5	3	2	0	99	1	2	18	0	77.2	77.3	158	77.25	18.7919	46.912	99	65	177	49	109	93	89	1	0	0	1	0	0	0	1	0	0	0	0	0	0	0	0	0	1	0	1	0	0	0	0	0	0	0	0
5	3	3	0	99	18	2	18	0	95.1	95.4	170	95.25	25.5644	73.881	119	80	159	65	77	84	92	1	0	1	0	0	0	0	0	1	0	0	0	0	1	0	1	0	0	0	1	0	1	1	0	0	0	2	0
2	1	2	0	99	4	1	18	0	81.9	80.9	170	81.4	19.9886	57.767	108	68	155	71	72	58	103	1	1	0	0	0	0	0	1	0	0	0	0	0	0	0	0	0	0	0	0	0	0	0	0	0	0	0	0
9	3	5	0	99	0	2	18	0	71.2	72.2	163	71.7	18.0041	47.835	92	58	154	51	89	68	72	1	0	0	0	0	0	0	0	0	0	0	0	0	0	0	0	0	0	0	0	0	0	0	0	0	0	0	0
5	3	5	0	99	5	2	18	0	97.4	97.4	169	97.4	28.5648	81.584	110	75	181	46	123	61	89	1	0	1	1	0	0	0	1	1	0	0	0	0	1	0	1	0	1	0	2	0	1	0	0	0	0	1	0
5	3	2	0	99	0	2	18	0	74.2	74.6	164	74.4	19.4382	52.281	103	61	228	61	154	67	96	1	0	0	0	0	0	0	0	0	0	0	0	0	0	0	0	0	0	0	0	0	0	0	0	0	0	0	0
2	3	3	0	99	21	2	18	0	78.7	78.2	158	78.45	22.9342	57.253	110	71	157	40	101	79	73	1	0	0	1	0	0	0	1	0	0	0	1	0	1	0	0	0	1	0	1	0	0	0	0	1	0	1	0
2	3	3	0	99	9	1	18	0	91.4	91	172	91.2	27.1454	80.307	117	70	129	38	81	51	80	1	0	0	1	0	0	0	1	0	0	0	1	0	1	0	1	0	1	0	2	0	0	0	0	1	0	1	0
4	3	4	0	99	0	2	18	0	75.4	75.7	153	75.55	22.7383	53.228	93	63	118	35	54	145	86	1	0	0	1	0	0	0	1	0	0	0	1	1	2	0	0	0	1	1	2	0	0	0	0	1	1	2	0
5	3	3	0	99	0	1	18	0	84	83.3	169	83.65	22.0955	63.107	134	75	189	63	109	86	95	1	0	0	0	0	0	0	0	0	0	0	0	0	0	0	0	0	0	0	0	0	0	1	0	0	0	1	0
5	3	2	0	99	0	1	18	0	82.2	82.2	173	82.2	21.0331	62.95	119	79	231	34	144	265	107	1	1	0	1	1	0	0	3	0	0	0	1	1	2	0	0	0	1	1	2	0	0	0	0	1	1	2	0
5	3	3	0	99	5	1	18	0	105.7	105.4	183	105.55	30.2556	101.323	127	73	107	35	58	72	93	1	0	1	1	0	0	0	1	1	0	0	1	0	2	0	1	0	1	0	2	0	1	0	0	1	0	2	0
2	3	5	0	99	0	2	18	0	74.4	74.9	153	74.65	22.4239	52.492	104	67	184	32	125	133	86	1	0	0	1	0	0	0	1	0	0	0	1	1	2	0	0	0	1	1	2	0	0	0	0	1	1	2	0
2	3	5	0	99	3	2	18	0	72.2	72.3	147	72.25	21.1278	45.655	101	69	124	72	43	45	112	1	1	0	0	0	0	0	1	0	1	0	0	0	1	0	0	1	0	0	1	0	0	0	1	0	0	1	0
2	3	99	0	99	0	2	18	0	73.3	73.5	159	73.4	20.1171	50.858	102	66	169	48	107	71	86	1	0	0	1	0	0	0	1	0	0	0	0	0	0	0	0	0	1	0	1	0	0	0	0	0	0	0	0
2	3	5	0	99	0	2	18	0	84.5	83.7	160	84.1	25.9285	66.377	117	76	183	44	123	82	85	1	0	1	1	0	0	0	1	0	0	0	0	0	0	0	0	0	1	0	1	0	0	0	0	0	0	0	0
2	3	5	0	99	0	2	18	0	84.2	83.8	164	84	22.6543	60.931	116	87	201	54	129	89	108	1	1	1	0	0	0	0	1	0	0	0	0	0	0	0	0	0	0	0	0	0	0	1	0	0	0	1	0
2	3	3	0	99	0	2	18	0	80.9	80.4	160	80.65	20.5473	52.601	111	72	205	58	132	76	101	1	1	1	0	0	0	0	1	0	0	0	0	0	0	0	0	0	0	0	0	0	0	0	0	0	0	0	0
2	3	99	0	99	0	2	18	0	69.8	69.5	163	69.65	16.5422	43.951	111	66	134	62	62	51	86	1	0	0	0	0	0	0	0	0	0	0	0	0	0	0	0	0	0	0	0	0	0	0	0	0	0	0	0
5	3	2	0	99	0	1	18	0	94.2	93.8	176	94	25.0733	77.667	134	75	155	52	83	98	96	1	0	1	0	0	0	0	0	0	0	0	0	0	0	0	1	0	0	0	1	0	0	1	0	0	0	1	0
2	1	5	0	99	0	1	18	0	90.1	89.8	184	89.95	22.4356	75.958	124	83	142	45	91	32	91	1	0	0	0	0	0	0	0	0	0	0	0	0	0	0	1	0	0	0	1	0	0	1	0	0	0	1	0
2	1	0	0	99	4	2	18	0	71.2	70.8	158	71	17.7484	44.307	97	66	150	65	76	47	100	1	1	0	0	0	0	0	1	0	0	0	0	0	0	0	0	0	0	0	0	0	0	0	0	0	0	0	0
5	1	1	0	99	0	1	18	0	80.8	81.2	172	81	18.6297	55.114	108	68	192	55	191	112	79	1	0	0	0	0	0	0	0	0	0	0	0	1	1	0	0	0	0	1	1	0	0	0	0	0	1	1	0
2	1	3	0	99	0	2	18	0	70.1	70.1	168	70.1	16.875	47.628	100	65	134	49	72	66	94	1	0	0	1	0	0	0	1	0	0	0	0	0	0	0	0	0	1	0	1	0	0	0	0	0	0	0	0
5	3	0	0	99	0	1	18	0	118.3	118.7	185	118.5	35.3367	120.94	136	78	233	35	159	193	92	1	0	1	1	1	0	1	2	1	0	0	1	1	3	1	1	0	1	1	3	1	1	1	0	1	1	4	1
5	2	1	0	99	4	1	18	0	82	81.3	179	81.65	22.5517	72.258	110	58	168	58	92	91	95	1	0	0	0	0	0	0	0	0	0	0	0	0	0	0	0	0	0	0	0	0	0	0	0	0	0	0	0
9	3	1	0	99	0	2	18	0	85.2	84.6	169	84.9	23.1844	66.217	110	73	157	51	95	57	88	1	0	1	0	0	0	0	0	0	0	0	0	0	0	0	1	0	0	0	1	0	0	0	0	0	0	0	0
2	3	3	0	99	0	2	18	0	78.2	78.2	161	78.2	20.4425	52.989	99	61	146	40	88	92	79	1	0	0	1	0	0	0	1	0	0	0	1	0	1	0	0	0	1	0	1	0	0	0	0	1	0	1	0
5	3	3	0	99	0	2	18	0	96.9	96.6	170	96.75	30.292	87.544	121	74	171	55	101	77	88	1	0	1	0	0	0	0	0	1	0	0	0	0	1	0	1	0	0	0	1	0	1	0	0	0	0	1	0
2	3	5	99	99	0	2	18	0	64.1	63.8	154	63.95	15.8087	37.492	95	65	152	63	71	88	157	1	1	0	0	0	0	0	1	0	1	0	0	0	1	0	0	1	0	0	1	0	0	0	1	0	0	1	0
1	3	99	1	1	11	2	18	0	67.6	68.1	151	67.85	18.0488	41.153	122	84	101	57	24	98	91	1	0	0	0	0	0	0	0	0	0	1	0	0	1	0	0	0	0	0	1	0	0	1	0	0	0	1	0
10	3	99	0	99	7	1	18	0	85.1	84.7	170	84.9	23.0893	66.728	115	67	139	40	86	67	138	1	1	0	0	0	0	0	1	0	1	0	1	0	2	0	0	1	1	0	2	0	0	0	1	1	0	2	0
2	3	3	0	99	8	2	18	0	80.1	79.7	150	79.9	26.0467	58.605	108	70	176	59	103	70	75	1	0	0	0	0	0	0	0	0	0	0	0	0	0	0	0	0	0	0	0	0	0	0	0	0	0	0	0
10	3	4	0	99	0	1	18	0	74	73.7	164	73.85	18.1399	48.789	115	72	181	47	119	76	89	1	0	0	0	0	0	0	0	0	0	0	0	0	0	0	0	0	0	0	0	0	0	0	0	0	0	0	0
2	1	0	99	99	0	2	19	0	73.5	74.3	166	73.9	17.3879	47.914	91	67	152	51	91	49	94	2	0	0	0	0	0	0	0	0	0	0	0	0	0	0	0	0	0	0	0	0	0	0	0	0	0	0	0
2	3	3	0	99	0	2	18	0	87.1	86.1	151	86.6	27.7944	63.374	108	69	151	42	68	205	94	1	0	1	1	1	0	1	2	0	0	0	0	1	1	0	1	0	1	1	3	1	0	0	0	0	1	1	0
2	3	4	0	99	22	1	18	0	99.1	99.3	179	99.2	28.9701	92.823	147	91	140	37	84	94	90	1	0	1	1	0	1	1	2	1	0	1	1	0	3	1	1	0	1	0	3	1	1	1	0	1	0	3	1
4	1	2	0	99	0	1	18	0	79.5	80.1	175	79.8	18.912	57.918	125	72	155	46	91	88	76	1	0	0	0	0	0	0	0	0	0	0	0	0	0	0	0	0	0	0	0	0	0	0	0	0	0	0	0
2	1	2	0	99	0	1	18	0	86.3	86.1	181	86.2	21.872	71.655	120	61	159	42	95	111	88	1	0	0	0	0	0	0	0	0	0	0	0	1	1	0	0	0	1	1	2	0	0	0	0	0	1	1	0
1	1	99	0	99	0	1	18	0	82.8	82.3	173	82.55	18.5355	55.475	111	68	165	45	86	172	97	1	0	0	0	1	0	0	1	0	0	0	0	1	1	0	0	0	0	1	1	0	0	0	0	0	1	1	0
2	3	3	0	99	0	2	18	0	73.1	73.6	166	73.35	18.5005	50.98	101	70	139	49	76	70	76	1	0	0	1	0	0	0	1	0	0	0	0	0	0	0	0	0	1	0	1	0	0	0	0	0	0	0	0
2	3	5	0	99	0	2	18	0	82.9	82.8	169	82.85	18.7199	53.466	119	78	156	47	93	78	108	1	1	1	1	0	0	1	2	0	0	1	0	0	1	0	0	0	1	0	2	0	0	0	0	0	0	0	0
2	2	5	0	99	7	2	18	0	72.7	72.2	147	72.45	19.7182	42.609	92	64	200	57	128	76	80	1	0	0	0	0	0	0	0	0	0	0	0	0	0	0	0	0	0	0	0	0	0	0	0	0	0	0	0
2	2	5	0	99	0	2	18	0	73.6	74.2	160	73.9	20.2141	51.748	115	77	155	56	91	42	88	1	0	0	0	0	0	0	0	0	0	0	0	0	0	0	0	0	0	0	0	0	0	0	0	0	0	0	0
5	3	2	0	99	4	1	18	0	107.9	107.4	175	107.65	30.9149	94.677	151	89	161	36	82	216	100	1	1	1	1	1	1	1	4	1	0	1	1	1	4	1	1	0	1	1	4	1	1	1	0	1	1	4	1
9	1	0	0	99	0	2	18	0	81.2	80.5	163	80.85	22.2203	59.037	99	69	169	61	96	59	80	1	0	1	0	0	0	0	0	0	0	0	0	0	0	0	0	0	0	0	0	0	0	0	0	0	0	0	0
5	1	0	0	99	0	2	18	0	90.8	91.4	164	91.1	24.9215	67.029	102	63	175	55	101	96	83	1	0	1	0	0	0	0	0	0	0	0	0	0	0	0	1	0	0	0	1	0	0	0	0	0	0	0	0
2	2	3	1	0	0	2	18	0	74.1	74.9	154	74.5	23.972	56.852	110	66	133	52	69	62	86	1	0	0	0	0	0	0	0	0	0	0	0	0	0	0	0	0	0	0	0	0	0	0	0	0	0	0	0
2	3	4	0	99	0	1	18	0	80.4	80.5	177	80.45	21.37	66.95	124	55	162	47	97	89	87	1	0	0	0	0	0	0	0	0	0	0	0	0	0	0	0	0	0	0	0	0	0	0	0	0	0	0	0
9	3	0	1	1	14	1	18	0	77.6	78.1	178	77.85	18.0744	57.267	110	68	122	32	75	76	83	1	0	0	1	0	0	0	1	0	0	0	1	0	1	0	0	0	1	0	1	0	0	0	0	1	0	1	0
2	2	2	0	99	3	2	18	0	72.3	73	162	72.65	17.6391	46.292	115	73	146	40	92	69	115	1	1	0	1	0	0	0	2	0	1	0	1	0	2	0	0	1	1	0	2	0	0	0	1	1	0	2	0
5	2	2	0	99	6	2	18	0	68.2	68.7	153	68.45	17.5394	41.058	99	67	191	61	99	156	89	1	0	0	0	1	0	0	1	0	0	0	0	1	1	0	0	0	0	1	1	0	0	0	0	0	1	1	0
1	3	4	99	99	0	1	18	0	76.6	76.8	167	76.7	18.1871	50.722	107	65	125	40	67	89	119	1	1	0	0	0	0	0	1	0	1	0	1	0	2	0	0	1	1	0	2	0	0	0	1	1	0	2	0
1	99	5	99	99	0	2	18	0	84.9	85.6	141	85.25	26.97	53.619	107	77	258	53	169	179	90	1	0	1	0	1	0	0	1	0	0	0	0	1	1	0	1	0	0	1	2	0	0	0	0	0	1	1	0
1	2	5	1	1	8	1	18	0	85.4	84.7	191	85.05	20.6324	75.269	103	61	144	33	92	96	107	1	1	0	1	0	0	0	2	0	0	0	1	0	1	0	0	0	1	0	1	0	0	0	0	1	0	1	0
2	3	5	1	0	9	1	18	0	83.6	83.7	163	83.65	24.3013	64.566	117	64	179	46	121	62	95	1	0	0	0	0	0	0	0	0	0	0	0	0	0	0	0	0	0	0	0	0	0	0	0	0	0	0	0
2	3	1	0	99	0	1	18	0	71.8	72.4	170	72.1	17.9865	51.981	106	60	128	55	68	25	118	1	1	0	0	0	0	0	1	0	1	0	0	0	1	0	0	1	0	0	1	0	0	0	1	0	0	1	0
9	3	2	0	99	0	1	18	0	93.5	93.8	176	93.65	25.3199	78.431	114	81	156	43	90	110	119	1	1	0	0	0	0	0	1	0	1	0	0	1	2	0	1	1	1	1	4	1	0	1	1	0	1	3	1
2	3	1	0	99	6	1	18	0	78.7	79	167	78.85	19.8946	55.484	118	77	124	43	66	77	126	1	1	0	0	0	0	0	1	0	1	0	0	0	1	0	0	1	1	0	2	0	0	0	1	0	0	1	0
2	1	4	0	99	5	2	18	0	98.7	98.6	160	98.65	32.9285	84.297	119	74	223	43	122	290	77	1	0	1	1	1	0	1	2	1	0	0	0	1	2	0	1	0	1	1	3	1	1	0	0	0	1	2	0
2	3	2	0	99	8	2	18	0	90.6	89.7	161	90.15	25.1179	65.108	109	74	229	52	147	149	89	1	0	1	0	0	0	0	0	0	0	0	0	1	1	0	1	0	0	1	2	0	0	0	0	0	1	1	0
5	1	1	0	99	0	1	18	0	83.7	84	174.5	83.85	20.7923	63.313	121	75	239	46	160	163	86	1	0	0	0	1	0	0	1	0	0	0	0	1	1	0	0	0	0	1	1	0	0	0	0	0	1	1	0
5	3	2	0	99	13	1	18	0	105.8	105.3	188	105.55	26.6034	94.027	119	67	158	42	103	65	91	1	0	1	0	0	0	0	0	1	0	0	0	0	1	0	1	0	1	0	2	0	1	0	0	0	0	1	0
5	3	1	0	99	0	1	18	0	100.9	100.2	177	100.55	28.3728	88.889	137	77	157	58	89	49	83	1	0	1	0	0	0	0	0	1	0	0	0	0	1	0	1	0	0	0	1	0	1	1	0	0	0	2	0
9	3	2	0	99	0	1	18	0	98.6	99.2	172	98.9	28.8304	85.292	119	66	161	36	102	115	81	1	0	1	1	0	0	0	1	1	0	0	1	1	3	1	1	0	1	1	3	1	1	0	0	1	1	3	1
5	3	5	0	99	10	2	18	0	97.8	96.9	159	97.35	29.0665	73.483	116	74	200	38	132	149	89	1	0	1	1	0	0	0	1	1	0	0	1	1	3	1	1	0	1	1	3	1	1	0	0	1	1	3	1
2	1	5	0	99	0	2	18	0	86.3	87	155	86.65	23.3665	56.138	128	79	87	33	42	58	91	1	0	1	1	0	0	0	1	0	0	1	1	0	2	0	1	0	1	0	3	1	0	0	0	1	0	1	0
5	3	3	0	99	0	2	18	0	72.6	72.3	158	72.45	18.2274	45.503	102	72	190	58	121	53	92	1	0	0	0	0	0	0	0	0	0	0	0	0	0	0	0	0	0	0	0	0	0	0	0	0	0	0	0
2	3	4	1	0	23	2	18	0	74	74.2	167	74.1	16.8131	46.89	98	60	195	88	91	82	81	1	0	0	0	0	0	0	0	0	0	0	0	0	0	0	0	0	0	0	0	0	0	0	0	0	0	0	0
2	3	4	0	99	0	2	18	0	73.3	73.5	163	73.4	20.2047	53.682	114	70	173	60	92	104	85	1	0	0	0	0	0	0	0	0	0	0	0	0	0	0	0	0	0	1	1	0	0	0	0	0	0	0	0
5	2	1	0	99	18	1	19	0	86.4	86.6	171	86.5	21.9969	64.321	110	61	143	58	72	64	88	2	0	0	0	0	0	0	0	0	0	0	0	0	0	0	0	0	0	0	0	0	0	0	0	0	0	0	0
5	3	2	0	99	0	1	19	0	87.1	87.4	175	87.25	23.1918	71.025	116	69	152	43	92	87	89	2	0	0	0	0	0	0	0	0	0	0	0	0	0	0	0	0	1	0	1	0	0	0	0	0	0	0	0
5	1	2	1	0	10	1	19	0	77.4	77.6	166	77.5	18.7658	51.711	115	71	124	39	66	93	96	2	0	0	1	0	0	0	1	0	0	0	1	0	1	0	0	0	1	0	1	0	0	0	0	1	0	1	0
5	3	1	0	99	0	2	19	0	84.9	84.9	165	84.9	22.1414	60.28	118	69	232	65	134	165	81	2	0	1	0	1	0	0	1	0	0	0	0	1	1	0	0	0	0	1	1	0	0	0	0	0	1	1	0
5	2	1	0	99	0	2	19	0	84.2	84.9	165	84.55	21.942	59.737	104	65	223	56	141	131	84	2	0	1	0	0	0	0	0	0	0	0	0	1	1	0	0	0	0	1	1	0	0	0	0	0	1	1	0
5	1	3	0	99	0	1	18	0	75.5	76.3	165	75.9	21.924	59.688	116	63	154	59	79	78	97	1	0	0	0	0	0	0	0	0	0	0	0	0	0	0	0	0	0	0	0	0	0	0	0	0	0	0	0
2	3	4	0	99	0	2	19	0	95.8	95.5	159	95.65	27.9471	70.653	100	63	149	46	90	63	85	2	0	1	1	0	0	0	1	1	0	0	0	0	1	0	1	0	1	0	2	0	1	0	0	0	0	1	0
5	3	1	0	99	0	2	19	0	70.2	70.4	155	70.3	18.4524	44.332	91	59	131	56	65	48	76	2	0	0	0	0	0	0	0	0	0	0	0	0	0	0	0	0	0	0	0	0	0	0	0	0	0	0	0
5	3	3	0	99	7	2	19	0	84.7	84.1	164	84.4	25.1067	67.527	120	76	147	62	74	57	90	2	0	1	0	0	0	0	0	0	0	0	0	0	0	0	0	0	0	0	0	0	0	0	0	0	0	0	0
5	2	2	0	99	12	1	19	0	74.5	74.9	176	74.7	19.7924	61.309	116	68	162	49	103	52	92	2	0	0	0	0	0	0	0	0	0	0	0	0	0	0	0	0	0	0	0	0	0	0	0	0	0	0	0
2	1	3	0	99	1	1	19	0	78.6	78.6	170	78.6	19.9284	57.593	107	67	162	53	98	57	98	2	0	0	0	0	0	0	0	0	0	0	0	0	0	0	0	0	0	0	0	0	0	0	0	0	0	0	0
5	3	2	0	99	11	2	18	0	82.9	82.6	160	82.75	23.6371	60.511	107	61	134	56	64	69	124	1	1	1	0	0	0	0	1	0	1	0	0	0	1	0	0	1	0	0	1	0	0	0	1	0	0	1	0
2	3	3	0	99	6	1	18	0	73.8	73.8	172	73.8	19.7316	58.374	138	76	138	53	71	69	85	1	0	0	0	0	0	0	0	0	0	0	0	0	0	0	0	0	0	0	0	0	0	1	0	0	0	1	0
4	3	4	0	99	0	2	18	0	74.6	75	159	74.8	18.2683	46.184	108	69	197	55	129	64	83	1	0	0	0	0	0	0	0	0	0	0	0	0	0	0	0	0	0	0	0	0	0	0	0	0	0	0	0
9	2	2	0	99	0	2	19	0	69.8	69.9	159	69.85	17.8838	45.212	109	73	223	76	135	60	81	2	0	0	0	0	0	0	0	0	0	0	0	0	0	0	0	0	0	0	0	0	0	0	0	0	0	0	0
9	2	3	0	99	4	2	19	0	84.2	84.7	174	84.45	22.2245	67.287	115	79	155	44	77	172	85	2	0	1	1	1	0	1	2	0	0	0	0	1	1	0	0	0	1	1	2	0	0	0	0	0	1	1	0
5	1	2	0	99	0	1	19	0	95.6	96.6	189	96.1	22.8711	81.698	132	77	134	36	79	96	114	2	1	1	1	0	0	1	2	1	1	0	1	0	3	1	1	1	1	0	3	1	1	1	1	1	0	4	1
2	3	99	0	99	0	1	19	0	75	75.5	167	75.25	19.7386	55.049	121	77	119	54	54	53	83	2	0	0	0	0	0	0	0	0	0	0	0	0	0	0	0	0	0	0	0	0	0	0	0	0	0	0	0
2	2	99	0	99	12	1	19	0	94.5	93.8	172	94.15	26.8469	79.424	129	75	188	45	112	156	98	2	0	1	0	1	0	0	1	0	0	0	0	1	1	0	1	0	0	1	2	0	0	0	0	0	1	1	0
5	3	4	0	99	0	2	19	0	88.8	89.3	157	89.05	24.0428	59.263	111	69	131	46	64	104	73	2	0	1	1	0	0	0	1	0	0	0	0	0	0	0	1	0	1	1	3	1	0	0	0	0	0	0	0
2	3	4	0	99	0	2	18	0	84.4	84.5	165	84.45	21.4141	58.3	112	79	175	66	80	147	105	1	1	1	0	0	0	0	1	0	0	0	0	1	1	0	0	0	0	1	1	0	0	0	0	0	1	1	0
5	1	3	1	0	13	2	18	0	85.4	85.3	164	85.35	21.9114	58.933	116	79	170	45	94	153	87	1	0	1	1	1	0	1	2	0	0	0	0	1	1	0	1	0	1	1	3	1	0	0	0	0	1	1	0
2	3	4	0	99	0	2	18	0	74.7	74.2	166	74.45	18.5622	51.15	110	68	137	60	65	58	90	1	0	0	0	0	0	0	0	0	0	0	0	0	0	0	0	0	0	0	0	0	0	0	0	0	0	0	0
5	3	1	0	99	0	1	19	0	91.6	91.9	172	91.75	25.0984	74.251	125	61	133	45	70	91	94	2	0	0	0	0	0	0	0	0	0	0	0	0	0	0	1	0	0	0	1	0	0	0	0	0	0	0	0
5	1	1	0	99	0	2	19	0	72.1	71.6	164	71.85	17.8324	47.962	97	60	116	40	56	102	75	2	0	0	1	0	0	0	1	0	0	0	1	0	1	0	0	0	1	1	2	0	0	0	0	1	0	1	0
5	1	2	0	99	0	2	19	0	87.5	87.5	163	87.5	24.943	66.271	122	74	166	41	102	115	11	2	0	1	1	0	0	0	1	0	0	0	0	1	1	0	1	0	1	1	3	1	0	0	0	0	1	1	0
5	3	4	0	99	7	2	19	0	80.7	80.5	146	80.6	24.8724	53.018	106	71	150	65	69	82	93	2	0	1	0	0	0	0	0	0	0	0	0	0	0	0	0	0	0	0	0	0	0	0	0	0	0	0	0
5	3	2	0	99	0	2	19	0	91.8	91.1	160	91.45	28.2621	72.351	98	70	195	51	121	115	80	2	0	1	0	0	0	0	0	0	0	0	0	1	1	0	1	0	0	1	2	0	0	0	0	0	1	1	0
9	1	2	0	99	9	2	18	0	75.1	75.5	168	75.3	19.4625	54.931	99	66	164	45	88	154	111	1	1	0	1	1	0	0	3	0	1	0	0	1	2	0	0	1	1	1	3	1	0	0	1	0	1	2	0
2	3	3	0	99	0	2	18	0	106.2	106.9	161	106.55	36.9735	95.839	138	87	194	51	124	93	114	1	1	1	0	0	1	1	2	1	1	1	0	0	3	1	1	1	0	0	3	1	1	1	1	0	0	3	1
5	3	3	0	99	0	1	18	0	93.4	93	171	93.2	25.6551	75.018	111	64	147	31	71	227	94	1	0	0	1	1	0	0	2	0	0	0	1	1	2	0	1	0	1	1	3	1	0	0	0	1	1	2	0
2	1	3	0	99	8	1	19	0	86.2	87.1	170	86.65	24.081	69.594	131	76	137	46	66	127	83	2	0	0	0	0	0	0	0	0	0	0	0	1	1	0	0	0	0	1	1	0	0	1	0	0	1	2	0
5	2	2	0	99	0	1	18	0	86	85.4	173	85.7	24.5665	73.525	111	60	165	55	101	46	91	1	0	0	0	0	0	0	0	0	0	0	0	0	0	0	0	0	0	0	0	0	0	0	0	0	0	0	0
4	3	3	0	99	0	2	19	0	83.9	83.2	160	83.55	27.5453	70.516	118	78	128	41	70	83	91	2	0	1	1	0	0	0	1	0	0	0	0	0	0	0	0	0	1	0	1	0	0	0	0	0	0	0	0
5	2	2	0	99	0	2	18	0	73.7	73.1	157	73.4	19.1205	47.13	100	68	152	55	86	56	91	1	0	0	0	0	0	0	0	0	0	0	0	0	0	0	0	0	0	0	0	0	0	0	0	0	0	0	0
9	3	3	0	99	3	2	18	0	99.8	99.8	161	99.8	30.7924	79.817	107	74	203	40	125	192	81	1	0	1	1	1	0	1	2	1	0	0	1	1	3	1	1	0	1	1	3	1	1	0	0	1	1	3	1
5	2	3	0	99	0	2	19	0	85.2	85.2	167	85.2	23.8811	66.602	114	72	257	51	182	120	86	2	0	1	0	0	0	0	0	0	0	0	0	1	1	0	0	0	0	1	1	0	0	0	0	0	1	1	0
2	3	5	0	99	0	2	18	0	85.6	85.5	153	85.55	24.1954	56.639	105	68	147	37	81	146	96	1	0	1	1	0	0	0	1	0	0	0	1	1	2	0	1	0	1	1	3	1	0	0	0	1	1	2	0
4	3	3	0	99	4	2	18	0	102.8	102.1	157	102.45	38.9383	95.979	114	69	193	41	130	110	91	1	0	1	1	0	0	0	1	1	0	0	0	1	2	0	1	0	1	1	3	1	1	0	0	0	1	2	0
5	3	99	0	99	0	2	19	0	74.3	74.8	169	74.55	18.2059	51.998	98	60	181	81	83	83	86	2	0	0	0	0	0	0	0	0	0	0	0	0	0	0	0	0	0	0	0	0	0	0	0	0	0	0	0
5	3	3	0	99	0	2	19	0	73.9	74.7	162.2	74.3	21.5399	56.669	107	74	159	53	98	40	87	2	0	0	0	0	0	0	0	0	0	0	0	0	0	0	0	0	0	0	0	0	0	0	0	0	0	0	0
5	3	5	0	99	0	2	19	0	100.4	100.4	162	100.4	30.7362	80.664	116	78	275	65	208	10	109	2	1	1	0	0	0	0	1	1	0	0	0	0	1	0	1	0	0	0	1	0	1	0	0	0	0	1	0
5	3	1	0	99	0	2	19	0	76.2	76.7	151	76.45	21.8784	49.885	98	58	170	42	108	101	75	2	0	0	1	0	0	0	1	0	0	0	0	0	0	0	0	0	1	1	2	0	0	0	0	0	0	0	0
5	1	5	0	99	0	2	19	0	73.3	73.6	165	73.45	17.8288	48.539	112	75	160	51	96	63	147	2	1	0	0	0	0	0	1	0	1	0	0	0	1	0	0	1	0	0	1	0	0	0	1	0	0	1	0
9	2	2	0	99	0	2	18	0	70.8	70.4	165	70.6	18.8738	51.384	93	65	177	64	101	61	129	1	1	0	0	0	0	0	1	0	1	0	0	0	1	0	0	1	0	0	1	0	0	0	1	0	0	1	0
5	3	4	0	99	0	2	19	0	80.2	80.3	155	80.25	21.563	51.805	119	71	228	56	160	58	83	2	0	1	0	0	0	0	0	0	0	0	0	0	0	0	0	0	0	0	0	0	0	0	0	0	0	0	0
5	2	1	0	99	16	2	18	0	97.9	98.7	164	98.3	28.7968	77.452	101	62	198	68	112	88	101	1	1	1	0	0	0	0	1	1	0	0	0	0	1	0	1	0	0	0	1	0	1	0	0	0	0	1	0
5	2	3	0	99	9	1	19	0	73.9	73.8	166	73.85	17.6412	48.612	101	65	183	46	119	91	93	2	0	0	0	0	0	0	0	0	0	0	0	0	0	0	0	0	0	0	0	0	0	0	0	0	0	0	0
9	3	2	0	99	0	2	18	0	89	89.2	164	89.1	24.5326	65.983	120	69	152	48	75	143	97	1	0	1	1	0	0	0	1	0	0	0	0	1	1	0	1	0	1	1	3	1	0	0	0	0	1	1	0
5	3	2	0	99	17	2	19	0	88.6	88.3	164	88.45	25.2889	68.017	114	67	187	54	120	66	111	2	1	1	0	0	0	0	1	0	1	0	0	0	1	0	1	1	0	0	2	0	0	0	1	0	0	1	0
5	3	99	0	99	0	2	19	0	79.4	79.6	168.5	79.5	18.8428	53.499	97	61	165	57	97	55	88	2	0	0	0	0	0	0	0	0	0	0	0	0	0	0	0	0	0	0	0	0	0	0	0	0	0	0	0
5	1	2	0	99	0	1	19	0	82.6	82.8	185	82.7	19.8323	67.876	121	75	136	68	54	69	105	2	1	0	0	0	0	0	1	0	0	0	0	0	0	0	0	0	0	0	0	0	0	0	0	0	0	0	0
5	3	3	0	99	0	1	19	0	89.6	89.4	177.5	89.5	22.9554	72.324	120	72	197	35	140	108	93	2	0	0	1	0	0	0	1	0	0	0	1	0	1	0	0	0	1	1	2	0	0	0	0	1	0	1	0
2	3	5	0	99	3	2	19	0	76.8	77	162	76.9	20.7872	54.554	110	72	117	41	63	63	102	2	1	0	1	0	0	0	2	0	0	0	0	0	0	0	0	0	1	0	1	0	0	0	0	0	0	0	0
5	1	5	0	99	13	2	19	0	86.6	85.6	169	86.1	24.9186	71.17	109	67	155	48	82	126	91	2	0	1	1	0	0	0	1	0	0	0	0	1	1	0	1	0	1	1	3	1	0	0	0	0	1	1	0
5	3	3	0	99	0	1	19	0	86.6	87.4	171	87	25.3052	73.995	126	60	181	38	119	119	99	2	0	0	1	0	0	0	1	0	0	0	1	1	2	0	0	0	1	1	2	0	0	0	0	1	1	2	0
5	3	3	0	99	2	1	19	0	90.4	90.1	164	90.25	22.8365	61.421	112	71	107	36	54	85	81	2	0	0	1	0	0	0	1	0	0	0	1	0	1	0	1	0	1	0	2	0	0	0	0	1	0	1	0
5	3	3	0	99	0	2	19	0	70.8	69.8	149	70.3	21.0927	46.828	104	62	138	59	67	62	91	2	0	0	0	0	0	0	0	0	0	0	0	0	0	0	0	0	0	0	0	0	0	0	0	0	0	0	0
2	3	3	0	99	0	1	18	0	75	75.9	176	75.45	18.2706	56.595	135	85	91	57	28	29	111	1	1	0	0	0	1	0	2	0	1	0	0	0	1	0	0	1	0	0	1	0	0	1	1	0	0	2	0
5	3	3	0	99	0	1	18	0	71.8	71	172.5	71.4	18.343	54.582	127	77	88	56	21	55	86	1	0	0	0	0	0	0	0	0	0	0	0	0	0	0	0	0	0	0	0	0	0	0	0	0	0	0	0
2	1	4	0	99	0	2	19	0	98.9	99.7	166	99.3	27.2162	74.997	112	76	141	40	77	121	90	2	0	1	1	0	0	0	1	1	0	0	1	1	3	1	1	0	1	1	3	1	1	0	0	1	1	3	1
2	3	0	1	1	12	1	19	0	81.1	80.9	183	81	21.1816	70.935	128	80	125	49	64	59	102	2	1	0	0	0	0	0	1	0	0	0	0	0	0	0	0	0	0	0	0	0	0	1	0	0	0	1	0
9	1	1	0	99	3	1	19	0	74.2	74.2	179	74.2	17.5004	56.073	109	69	121	43	65	65	95	2	0	0	0	0	0	0	0	0	0	0	0	0	0	0	0	0	1	0	1	0	0	0	0	0	0	0	0
5	1	0	1	1	16	2	19	0	73.4	73.6	160	73.5	18.5238	47.421	102	70	182	76	97	47	104	2	1	0	0	0	0	0	1	0	0	0	0	0	0	0	0	0	0	0	0	0	0	0	0	0	0	0	0
5	1	2	0	99	7	1	19	0	88.5	89	190	88.75	20.7416	74.877	117	77	120	43	57	99	98	2	0	0	0	0	0	0	0	0	0	0	0	0	0	0	0	0	1	0	1	0	0	0	0	0	0	0	0
10	3	3	0	99	2	2	19	0	74.6	74.9	162	74.75	19.6853	51.662	99	61	191	78	101	58	101	2	1	0	0	0	0	0	1	0	0	0	0	0	0	0	0	0	0	0	0	0	0	0	0	0	0	0	0
5	3	4	0	99	0	1	18	0	94.3	94.2	173	94.25	24.8401	74.344	109	66	118	67	30	104	111	1	1	1	0	0	0	0	1	0	1	0	0	0	1	0	1	1	0	1	3	1	0	0	1	0	0	1	0
5	3	1	0	99	0	2	19	0	82.9	82.8	170	82.85	23.6657	68.394	108	74	155	46	96	63	92	2	0	1	1	0	0	0	1	0	0	0	0	0	0	0	0	0	1	0	1	0	0	0	0	0	0	0	0
5	2	4	0	99	1	2	19	0	75.5	76.5	166	76	21.0415	57.982	100	66	203	43	143	83	101	2	1	0	1	0	0	0	2	0	0	0	0	0	0	0	0	0	1	0	1	0	0	0	0	0	0	0	0
2	3	4	0	99	0	1	18	0	78.2	78.4	174	78.3	18.1864	55.061	105	63	145	46	77	110	73	1	0	0	0	0	0	0	0	0	0	0	0	1	1	0	0	0	0	1	1	0	0	0	0	0	1	1	0
2	3	3	0	99	0	2	18	0	84.8	84.9	153	84.85	24.271	56.816	109	68	196	48	121	134	90	1	0	1	1	0	0	0	1	0	0	0	0	1	1	0	1	0	1	1	3	1	0	0	0	0	1	1	0
4	2	4	0	99	0	2	18	0	70	69.7	154	69.85	18.151	43.047	104	65	195	56	125	71	88	1	0	0	0	0	0	0	0	0	0	0	0	0	0	0	0	0	0	0	0	0	0	0	0	0	0	0	0
5	1	1	0	99	3	2	19	0	76.1	75.9	155	76	21.1575	50.831	94	70	140	60	71	47	88	2	0	0	0	0	0	0	0	0	0	0	0	0	0	0	0	0	0	0	0	0	0	0	0	0	0	0	0
2	2	2	1	0	0	2	18	0	72.5	73.3	162	72.9	16.9837	44.572	104	67	150	87	55	38	94	1	0	0	0	0	0	0	0	0	0	0	0	0	0	0	0	0	0	0	0	0	0	0	0	0	0	0	0
5	1	3	0	99	4	2	19	0	69.6	68.8	155	69.2	16.2726	39.095	99	69	137	53	74	51	113	2	1	0	0	0	0	0	1	0	1	0	0	0	1	0	0	1	0	0	1	0	0	0	1	0	0	1	0
5	3	2	0	99	17	2	19	0	69.5	69	153	69.25	17.5116	40.993	94	55	160	59	84	83	90	2	0	0	0	0	0	0	0	0	0	0	0	0	0	0	0	0	0	0	0	0	0	0	0	0	0	0	0
5	3	3	0	99	0	2	19	0	75.6	75.1	163	75.35	18.3018	48.626	111	67	145	69	60	81	90	2	0	0	0	0	0	0	0	0	0	0	0	0	0	0	0	0	0	0	0	0	0	0	0	0	0	0	0
5	2	2	0	99	0	1	18	0	82.8	82.7	187	82.75	20.1078	70.315	116	62	149	45	82	110	82	1	0	0	0	0	0	0	0	0	0	0	0	1	1	0	0	0	0	1	1	0	0	0	0	0	1	1	0
2	3	5	0	99	0	2	19	0	104	104.5	158	104.25	32.4015	80.887	110	74	136	25	83	140	108	2	1	1	1	0	0	1	2	1	0	0	1	1	3	1	1	0	1	1	3	1	1	0	0	1	1	3	1
9	1	2	0	99	6	1	18	0	84	83.9	184	83.95	19.7433	66.843	109	69	120	33	73	70	89	1	0	0	1	0	0	0	1	0	0	0	1	0	1	0	0	0	1	0	1	0	0	0	0	1	0	1	0
5	2	3	0	99	0	2	19	0	75.3	75.4	158	75.35	19.6791	49.127	93	58	175	77	80	91	102	2	1	0	0	0	0	0	1	0	0	0	0	0	0	0	0	0	0	0	0	0	0	0	0	0	0	0	0
5	3	2	0	99	0	2	19	0	73.8	74	165.8	73.9	17.4851	48.066	96	63	169	57	101	57	83	2	0	0	0	0	0	0	0	0	0	0	0	0	0	0	0	0	0	0	0	0	0	0	0	0	0	0	0
5	1	1	0	99	0	2	19	0	73.3	73.5	155.5	73.4	20.5618	49.719	104	68	156	64	83	47	83	2	0	0	0	0	0	0	0	0	0	0	0	0	0	0	0	0	0	0	0	0	0	0	0	0	0	0	0
5	3	4	0	99	0	2	18	0	78.3	78.4	158	78.35	19.6519	49.059	107	70	168	63	96	47	86	1	0	0	0	0	0	0	0	0	0	0	0	0	0	0	0	0	0	0	0	0	0	0	0	0	0	0	0
5	2	3	0	99	9	2	18	0	87.2	87	154.5	87.1	26.4182	63.061	117	79	213	62	133	88	78	1	0	1	0	0	0	0	0	0	0	0	0	0	0	0	1	0	0	0	1	0	0	0	0	0	0	0	0
5	1	3	0	99	6	1	19	0	84.7	85.1	182	84.9	20.4033	67.584	136	74	241	46	155	67	96	2	0	0	0	0	0	0	0	0	0	0	0	0	0	0	0	0	0	0	0	0	0	1	0	0	0	1	0
5	3	1	0	99	0	1	19	0	86.6	87.1	186	86.85	22.0578	76.311	134	74	104	33	53	89	38	2	0	0	1	0	0	0	1	0	0	0	1	0	1	0	0	0	1	0	1	0	0	1	0	1	0	2	0
2	1	1	0	99	7	2	19	0	75.5	75.8	173.5	75.65	19.6484	59.146	118	68	164	51	98	76	110	2	1	0	0	0	0	0	1	0	1	0	0	0	1	0	0	1	0	0	1	0	0	0	1	0	0	1	0
5	3	3	0	99	3	1	19	0	109.4	108.7	188	109.05	28.4023	100.385	129	76	116	35	54	135	144	2	1	1	1	0	0	1	2	1	1	0	1	1	4	1	1	1	1	1	4	1	1	0	1	1	1	4	1
5	1	2	0	99	7	1	18	0	99.3	99.7	180	99.5	25.1775	81.575	133	78	93	39	43	54	124	1	1	1	1	0	0	1	2	1	1	0	1	0	3	1	1	1	1	0	3	1	1	1	1	1	0	4	1
5	3	5	0	99	0	2	18	0	70.2	69.8	162	70	16.6678	43.743	101	71	186	74	100	59	69	1	0	0	0	0	0	0	0	0	0	0	0	0	0	0	0	0	0	0	0	0	0	0	0	0	0	0	0
5	1	2	0	99	5	1	19	0	88.2	88.7	173	88.45	20.9396	62.67	116	68	159	48	84	135	89	2	0	0	0	0	0	0	0	0	0	0	0	1	1	0	0	0	0	1	1	0	0	0	0	0	1	1	0
5	2	99	0	99	7	2	19	0	67.9	67.2	150	67.55	16.4773	37.074	98	57	133	54	72	33	99	2	0	0	0	0	0	0	0	0	0	0	0	0	0	0	0	0	0	0	0	0	0	0	0	0	0	0	0
2	1	2	0	99	1	2	19	0	80.4	80.9	154	80.65	20.401	48.383	102	77	140	63	66	55	116	2	1	1	0	0	0	0	1	0	1	0	0	0	1	0	0	1	0	0	1	0	0	0	1	0	0	1	0
5	3	3	0	99	0	1	19	0	85.5	86.4	177.5	85.95	31.3849	98.882	121	67	128	47	65	78	77	2	0	0	0	0	0	0	0	0	0	0	0	0	0	0	0	0	0	0	0	0	0	0	0	0	0	0	0
5	3	0	0	99	0	2	19	0	90.1	89.8	159	89.95	27.1659	68.678	116	76	150	66	72	59	78	2	0	1	0	0	0	0	0	0	0	0	0	0	0	0	1	0	0	0	1	0	0	0	0	0	0	0	0
2	3	2	0	99	0	1	19	0	91.3	91.5	173	91.4	27.3972	81.997	118	69	139	38	60	205	104	2	1	0	1	1	0	0	3	0	0	0	1	1	2	0	1	0	1	1	3	1	0	0	0	1	1	2	0
5	1	2	0	99	0	2	19	0	73.3	73.6	168	73.45	19.8487	56.021	102	70	181	64	104	67	92	2	0	0	0	0	0	0	0	0	0	0	0	0	0	0	0	0	0	0	0	0	0	0	0	0	0	0	0
4	1	3	0	99	0	2	19	0	86.2	86.4	164	86.3	22.6811	61.003	114	74	190	49	121	101	125	2	1	1	1	0	0	1	2	0	1	0	0	0	1	0	1	1	1	1	4	1	0	0	1	0	0	1	0
4	3	5	0	99	5	2	19	0	96.1	96	156	96.05	28.8753	70.271	135	85	220	36	126	291	88	2	0	1	1	1	1	1	3	1	0	0	1	1	3	1	1	0	1	1	3	1	1	1	0	1	1	4	1
5	1	2	0	99	0	2	19	0	80.3	80.4	153	80.35	19.8539	46.476	98	71	142	64	68	51	116	2	1	1	0	0	0	0	1	0	1	0	0	0	1	0	0	1	0	0	1	0	0	0	1	0	0	1	0
5	3	1	0	99	1	2	18	0	85.9	86.5	155	86.2	21.5792	51.844	111	73	128	51	64	67	162	1	1	1	0	0	0	0	1	0	1	0	0	0	1	0	1	1	0	0	2	0	0	0	1	0	0	1	0
5	3	3	1	1	12	1	19	0	72.7	72.4	164	72.55	17.2721	46.455	93	62	128	50	65	65	87	2	0	0	0	0	0	0	0	0	0	0	0	0	0	0	0	0	0	0	0	0	0	0	0	0	0	0	0
5	3	0	0	99	0	2	19	0	85.8	85.2	159	85.5	23.4132	59.191	111	73	137	38	76	115	98	2	0	1	1	0	0	0	1	0	0	0	1	1	2	0	0	0	1	1	2	0	0	0	0	1	1	2	0
5	1	3	0	99	0	2	19	0	89.4	88.9	157	89.15	28.9529	71.366	116	68	140	41	82	85	82	2	0	1	1	0	0	0	1	0	0	0	0	0	0	0	1	0	1	0	2	0	0	0	0	0	0	0	0
2	3	5	0	99	0	2	18	0	71.3	70.7	160	71	17.1902	44.007	96	63	149	63	75	53	97	1	0	0	0	0	0	0	0	0	0	0	0	0	0	0	0	0	0	0	0	0	0	0	0	0	0	0	0
9	3	4	0	99	0	2	19	0	77.9	78	162	77.95	21.5539	56.566	89	56	181	80	95	28	95	2	0	0	0	0	0	0	0	0	0	0	0	0	0	0	0	0	0	0	0	0	0	0	0	0	0	0	0
4	2	2	0	99	0	1	19	0	92.9	92.8	173	92.85	26.9889	80.775	132	74	186	37	110	197	89	2	0	0	1	1	0	0	2	0	0	0	1	1	2	0	1	0	1	1	3	1	0	1	0	1	1	3	1
5	3	2	0	99	0	2	19	0	78.9	78.4	157	78.65	22.6155	55.745	108	72	233	79	133	104	90	2	0	0	0	0	0	0	0	0	0	0	0	0	0	0	0	0	0	1	1	0	0	0	0	0	0	0	0
5	3	2	0	99	10	1	19	0	82.8	82.3	174	82.55	23.3809	70.788	111	58	163	48	101	68	83	2	0	0	0	0	0	0	0	0	0	0	0	0	0	0	0	0	0	0	0	0	0	0	0	0	0	0	0
5	1	2	0	99	0	1	19	0	81.1	81.2	181	81.15	19.3523	63.4	124	66	128	68	48	58	67	2	0	0	0	0	0	0	0	0	0	0	0	0	0	0	0	0	0	0	0	0	0	0	0	0	0	0	0
4	3	5	0	99	0	2	18	0	92.6	92.1	156	92.35	26.0158	63.312	102	65	179	37	119	117	99	1	0	1	1	0	0	0	1	1	0	0	1	1	3	1	1	0	1	1	3	1	1	0	0	1	1	3	1
5	2	4	0	99	0	1	18	0	74.4	74.3	169	74.35	17.915	51.167	114	68	140	31	82	136	102	1	1	0	1	0	0	0	2	0	0	0	1	1	2	0	0	0	1	1	2	0	0	0	0	1	1	2	0
5	3	2	0	99	12	1	18	0	95.4	94.8	185	95.1	27.0808	92.684	109	69	158	65	75	90	91	1	0	1	0	0	0	0	0	1	0	0	0	0	1	0	1	0	0	0	1	0	1	0	0	0	0	1	0
5	2	5	1	1	16	1	19	0	83.5	83.5	171	83.5	20.8413	60.942	134	78	108	42	56	50	101	2	1	0	0	0	0	0	1	0	0	0	0	0	0	0	0	0	1	0	1	0	0	1	0	0	0	1	0
2	1	2	0	99	0	2	19	0	80.3	81.3	155.5	80.8	23.5093	56.846	104	64	150	62	75	66	82	2	0	1	0	0	0	0	0	0	0	0	0	0	0	0	0	0	0	0	0	0	0	0	0	0	0	0	0
5	1	0	0	99	0	2	18	0	80	79.5	170	79.75	18.3446	53.016	104	74	182	57	111	70	80	1	0	0	0	0	0	0	0	0	0	0	0	0	0	0	0	0	0	0	0	0	0	0	0	0	0	0	0
5	3	0	0	99	0	2	19	0	80.9	80.6	163	80.75	17.7907	47.268	105	62	136	51	75	51	84	2	0	1	0	0	0	0	0	0	0	0	0	0	0	0	0	0	0	0	0	0	0	0	0	0	0	0	0
5	1	0	0	99	1	2	19	0	75.2	74.5	171	74.85	20.1211	58.836	103	69	158	66	145	63	77	2	0	0	0	0	0	0	0	0	0	0	0	0	0	0	0	0	0	0	0	0	0	0	0	0	0	0	0
5	2	3	0	99	0	2	18	0	92.4	93.4	159.5	92.9	27.0548	68.828	108	69	127	60	55	58	98	1	0	1	0	0	0	0	0	1	0	0	0	0	1	0	1	0	0	0	1	0	1	0	0	0	0	1	0
5	3	4	0	99	0	2	18	0	91.1	91.1	154	91.1	27.7488	65.809	121	77	193	50	125	88	86	1	0	1	0	0	0	0	0	0	0	0	0	0	0	0	1	0	0	0	1	0	0	0	0	0	0	0	0
5	3	4	0	99	0	2	19	0	78.5	78.4	160	78.45	20.6484	52.86	99	66	181	42	119	98	77	2	0	0	1	0	0	0	1	0	0	0	0	0	0	0	0	0	1	0	1	0	0	0	0	0	0	0	0
5	1	1	0	99	0	2	18	0	77.1	77.1	156	77.1	23.2043	56.47	119	71	228	75	122	156	116	1	1	0	0	1	0	0	2	0	1	0	0	1	2	0	0	1	0	1	2	0	0	0	1	0	1	2	0
4	3	4	0	99	0	2	18	0	82.4	82.7	161	82.55	23.0284	59.692	112	70	158	52	90	80	81	1	0	1	0	0	0	0	0	0	0	0	0	0	0	0	0	0	0	0	0	0	0	0	0	0	0	0	0
2	3	99	0	99	0	2	19	0	71.3	71.4	160	71.35	18.1469	46.456	93	65	149	55	75	93	112	2	1	0	0	0	0	0	1	0	1	0	0	0	1	0	0	1	0	0	1	0	0	0	1	0	0	1	0
9	3	4	0	99	6	1	18	0	83.9	83.3	185.5	83.6	18.8877	64.993	120	72	246	40	165	204	95	1	0	0	0	1	0	0	1	0	0	0	1	1	2	0	0	0	1	1	2	0	0	0	0	1	1	2	0
5	3	1	0	99	0	2	19	0	111	111.3	176	111.15	36.1922	112.109	109	71	143	43	86	68	71	2	0	1	1	0	0	0	1	1	0	0	0	0	1	0	1	0	1	0	2	0	1	0	0	0	0	1	0
9	3	4	0	99	8	2	18	0	68.3	68.9	172	68.6	16.5404	48.933	102	69	136	35	90	55	83	1	0	0	1	0	0	0	1	0	0	0	1	0	1	0	0	0	1	0	1	0	0	0	0	1	0	1	0
5	3	3	0	99	8	2	18	0	72.4	72.2	157	72.3	18.0949	44.602	98	63	129	52	65	61	80	1	0	0	0	0	0	0	0	0	0	0	0	0	0	0	0	0	0	0	0	0	0	0	0	0	0	0	0
5	3	5	0	99	0	2	19	0	88.3	89.1	156.5	88.7	27.4703	67.281	99	75	210	51	143	79	115	2	1	1	0	0	0	0	1	0	1	0	0	0	1	0	1	1	0	0	2	0	0	0	1	0	0	1	0
5	3	1	0	99	0	1	19	0	91.7	91.2	183	91.45	24.3247	81.461	118	74	142	42	84	78	108	2	1	0	0	0	0	0	1	0	0	0	0	0	0	0	1	0	1	0	2	0	0	0	0	0	0	0	0
5	1	1	0	99	8	2	19	0	87.6	87.1	160	87.35	25.6801	65.741	97	57	160	50	97	66	82	2	0	1	0	0	0	0	0	0	0	0	0	0	0	0	1	0	0	0	1	0	0	0	0	0	0	0	0
5	1	1	0	99	14	2	19	0	83.9	83.8	164	83.85	22.9235	61.655	111	72	229	64	142	113	102	2	1	1	0	0	0	0	1	0	0	0	0	1	1	0	0	0	0	1	1	0	0	0	0	0	1	1	0
5	3	3	0	99	18	2	19	0	62.2	62.3	155	62.25	15.3777	36.945	85	60	159	70	80	43	78	2	0	0	0	0	0	0	0	0	0	0	0	0	0	0	0	0	0	0	0	0	0	0	0	0	0	0	0
10	3	99	0	99	0	1	18	0	74.3	73.5	174	73.9	18.0694	54.707	103	55	112	39	45	140	98	1	0	0	1	0	0	0	1	0	0	0	1	1	2	0	0	0	1	1	2	0	0	0	0	1	1	2	0
2	3	5	0	99	7	2	18	0	83.8	84.4	158	84.1	23.2715	58.095	104	65	139	50	75	72	91	1	0	1	0	0	0	0	0	0	0	0	0	0	0	0	0	0	0	0	0	0	0	0	0	0	0	0	0
5	3	2	0	99	15	1	19	0	78.4	77.8	181	78.1	18.1328	59.405	127	74	135	72	50	64	95	2	0	0	0	0	0	0	0	0	0	0	0	0	0	0	0	0	0	0	0	0	0	0	0	0	0	0	0
2	3	4	0	99	8	2	19	0	82.7	82.7	158	82.7	23.9449	59.776	100	59	132	71	52	45	82	2	0	1	0	0	0	0	0	0	0	0	0	0	0	0	0	0	0	0	0	0	0	0	0	0	0	0	0
5	2	2	0	99	0	2	19	0	86.9	86.1	155	86.5	24.4728	58.796	103	70	214	56	134	121	92	2	0	1	0	0	0	0	0	0	0	0	0	1	1	0	1	0	0	1	2	0	0	0	0	0	1	1	0
5	2	4	0	99	6	1	19	0	75.9	76.3	168	76.1	18.738	52.886	100	58	117	54	53	50	93	2	0	0	0	0	0	0	0	0	0	0	0	0	0	0	0	0	0	0	0	0	0	0	0	0	0	0	0
2	3	4	0	99	0	2	19	0	86	85.5	160	85.75	22.0852	56.538	106	78	147	48	89	51	98	2	0	1	1	0	0	0	1	0	0	0	0	0	0	0	0	0	1	0	1	0	0	0	0	0	0	0	0
9	1	2	0	99	1	2	19	0	86.7	86.7	161	86.7	25.6873	66.584	113	69	162	61	89	59	85	2	0	1	0	0	0	0	0	0	0	0	0	0	0	0	1	0	0	0	1	0	0	0	0	0	0	0	0
5	3	3	0	99	6	1	18	0	76.1	75.6	162	75.85	21.2811	55.85	116	65	135	40	78	85	90	1	0	0	0	0	0	0	0	0	0	0	1	0	1	0	0	0	1	0	1	0	0	0	0	1	0	1	0
2	3	4	0	99	0	2	18	0	87.7	87.5	163	87.6	26.1278	69.419	119	79	182	56	112	69	96	1	0	1	0	0	0	0	0	0	0	1	0	0	1	0	1	0	0	0	2	0	0	0	0	0	0	0	0
5	2	3	0	99	7	2	19	0	79.2	79.5	159	79.35	24.0335	60.759	106	73	199	48	133	89	98	2	0	0	1	0	0	0	1	0	0	0	0	0	0	0	0	0	1	0	1	0	0	0	0	0	0	0	0
5	3	99	0	99	0	2	18	0	71.4	71.4	161	71.4	17.5325	45.446	104	73	171	69	87	75	99	1	0	0	0	0	0	0	0	0	0	0	0	0	0	0	0	0	0	0	0	0	0	0	0	0	0	0	0
2	3	2	0	99	4	1	18	0	105.8	105.7	179	105.75	30.6751	98.286	149	84	120	39	60	105	83	1	0	1	1	0	0	0	1	1	0	1	1	0	3	1	1	0	1	1	4	1	1	1	0	1	0	3	1
2	1	0	0	99	0	1	18	0	100.3	100.1	182	100.2	28.7372	95.189	124	65	136	36	84	79	99	1	0	1	1	0	0	0	1	1	0	0	1	0	2	0	1	0	1	0	2	0	1	0	0	1	0	2	0
9	2	3	0	99	0	2	19	0	91.5	90.8	163	91.15	28.0643	74.564	107	76	170	46	110	72	97	2	0	1	1	0	0	0	1	0	0	0	0	0	0	0	1	0	1	0	2	0	0	0	0	0	0	0	0
5	3	2	0	99	8	2	19	0	70.2	70.4	169.5	70.3	16.3465	46.964	101	61	163	61	93	46	94	2	0	0	0	0	0	0	0	0	0	0	0	0	0	0	0	0	0	0	0	0	0	0	0	0	0	0	0
5	3	1	0	99	0	2	18	0	80.9	81.4	152	81.15	23.6613	54.667	98	63	137	46	80	55	87	1	0	1	1	0	0	0	1	0	0	0	0	0	0	0	0	0	1	0	1	0	0	0	0	0	0	0	0
2	1	5	1	1	9	2	18	0	71.5	71	158	71.25	18.8972	47.175	111	71	135	66	60	46	81	1	0	0	0	0	0	0	0	0	0	0	0	0	0	0	0	0	0	0	0	0	0	0	0	0	0	0	0
5	1	0	0	99	0	1	19	0	91.2	90.9	175	91.05	23.0263	70.518	110	67	147	36	66	213	92	2	0	0	1	1	0	0	2	0	0	0	1	1	2	0	1	0	1	1	3	1	0	0	0	1	1	2	0
5	1	1	0	99	0	2	18	0	91.7	91.5	156	91.6	30.9698	75.368	102	65	175	47	113	77	88	1	0	1	1	0	0	0	1	0	0	0	0	0	0	0	1	0	1	0	2	0	0	0	0	0	0	0	0
2	3	5	0	99	0	2	18	0	83.9	84.6	168	84.25	21.1483	59.689	101	67	140	38	94	42	63	1	0	1	1	0	0	0	1	0	0	0	1	0	1	0	0	0	1	0	1	0	0	0	0	1	0	1	0
9	3	2	0	99	7	2	18	0	87	87	166	87	22.8048	62.841	115	69	136	50	77	47	91	1	0	1	0	0	0	0	0	0	0	0	0	0	0	0	1	0	0	0	1	0	0	0	0	0	0	0	0
2	3	99	0	99	10	1	18	0	88.8	89.3	178	89.05	23.111	73.225	126	66	140	52	76	60	107	1	1	0	0	0	0	0	1	0	0	0	0	0	0	0	1	0	0	0	1	0	0	0	0	0	0	0	0
5	3	3	0	99	0	2	19	0	92	92.3	165	92.15	27.2716	74.247	102	65	169	66	84	94	65	2	0	1	0	0	0	0	0	1	0	0	0	0	1	0	1	0	0	0	1	0	1	0	0	0	0	1	0
2	3	3	0	99	0	2	18	0	80.9	80.8	169	80.85	22.4064	63.995	109	65	149	41	91	86	85	1	0	1	1	0	0	0	1	0	0	0	0	0	0	0	0	0	1	0	1	0	0	0	0	0	0	0	0
5	3	3	1	1	2	2	19	0	87.1	87.8	166	87.45	23.8932	65.84	100	70	135	37	68	148	75	2	0	1	1	0	0	0	1	0	0	0	1	1	2	0	1	0	1	1	3	1	0	0	0	1	1	2	0
5	3	2	0	99	3	2	18	0	78.6	78.1	162	78.35	19.6171	51.483	111	76	135	65	51	95	86	1	0	0	0	0	0	0	0	0	0	0	0	0	0	0	0	0	0	0	0	0	0	0	0	0	0	0	0
2	3	2	0	99	0	1	19	0	89.2	89.8	170.5	89.5	24.5605	71.398	112	67	165	57	97	54	92	2	0	0	0	0	0	0	0	0	0	0	0	0	0	0	0	0	0	0	0	0	0	0	0	0	0	0	0
5	2	2	0	99	12	2	19	0	80.4	79.9	172.6	80.15	22.464	66.922	103	64	127	44	73	51	122	2	1	1	1	0	0	1	2	0	1	0	0	0	1	0	0	1	1	0	2	0	0	0	1	0	0	1	0
5	3	2	0	99	0	1	18	0	89.4	89.6	173	89.5	23.8107	71.263	112	72	157	36	92	146	87	1	0	0	1	0	0	0	1	0	0	0	1	1	2	0	1	0	1	1	3	1	0	0	0	1	1	2	0
2	3	5	0	99	0	2	18	0	80.5	80.4	157	80.45	21.8406	53.835	110	67	108	33	53	112	108	1	1	1	1	0	0	1	2	0	0	0	1	1	2	0	0	0	1	1	2	0	0	0	0	1	1	2	0
5	3	2	0	99	0	2	18	0	84.4	84.2	160	84.3	23.5613	60.317	95	67	163	47	100	81	98	1	0	1	1	0	0	0	1	0	0	0	0	0	0	0	0	0	1	0	1	0	0	0	0	0	0	0	0
2	1	99	0	99	0	2	18	0	71.6	71.2	154	71.4	18.6258	44.173	96	61	124	37	74	64	88	1	0	0	1	0	0	0	1	0	0	0	1	0	1	0	0	0	1	0	1	0	0	0	0	1	0	1	0
5	1	3	0	99	0	1	19	0	82.2	81.5	166	81.85	21.2643	58.596	150	85	211	62	128	104	86	2	0	0	0	0	1	0	1	0	0	0	0	0	0	0	0	0	0	1	1	0	0	1	0	0	0	1	0
2	3	4	0	99	0	1	19	0	70.8	70.4	179	70.6	16.8912	54.121	110	73	140	44	83	66	96	2	0	0	0	0	0	0	0	0	0	0	0	0	0	0	0	0	1	0	1	0	0	0	0	0	0	0	0
2	3	4	0	99	10	1	19	0	79.5	79.4	181	79.45	19.4335	63.666	115	68	100	46	44	49	94	2	0	0	0	0	0	0	0	0	0	0	0	0	0	0	0	0	0	0	0	0	0	0	0	0	0	0	0
2	1	3	0	99	0	2	18	0	84.4	84.5	158	84.45	27.0421	67.508	108	75	135	38	87	50	85	1	0	1	1	0	0	0	1	0	0	0	1	0	1	0	0	0	1	0	1	0	0	0	0	1	0	1	0
2	2	5	0	99	0	2	18	0	75.6	76	163	75.8	19.7045	52.353	101	65	171	51	108	58	102	1	1	0	0	0	0	0	1	0	0	0	0	0	0	0	0	0	0	0	0	0	0	0	0	0	0	0	0
2	3	5	0	99	0	2	19	0	78.1	77.6	161	77.85	20.0887	52.072	127	82	182	87	89	32	94	2	0	0	0	0	0	0	0	0	0	0	0	0	0	0	0	0	0	0	0	0	0	1	0	0	0	1	0
5	1	0	0	99	0	2	18	0	72.7	72.7	161	72.7	20.3329	52.705	112	83	137	65	52	101	100	1	1	0	0	0	0	0	1	0	0	0	0	0	0	0	0	0	0	1	1	0	0	1	0	0	0	1	0
2	3	3	1	0	0	1	18	0	75.4	75.8	168	75.6	20.0964	56.72	134	85	185	49	113	113	95	1	0	0	0	0	1	0	1	0	0	0	0	1	1	0	0	0	0	1	1	0	0	1	0	0	1	2	0
2	3	3	0	99	0	2	18	0	75.2	75.4	151	75.3	18.3426	41.823	97	68	221	54	144	116	98	1	0	0	0	0	0	0	0	0	0	0	0	1	1	0	0	0	0	1	1	0	0	0	0	0	1	1	0
5	2	5	0	99	3	2	18	0	86.6	86.2	160	86.4	26.7605	68.507	106	71	54	50	91	63	88	1	0	1	0	0	0	0	0	0	0	0	0	0	0	0	1	0	0	0	1	0	0	0	0	0	0	0	0
2	3	2	1	1	12	2	18	0	73	72.6	159	72.8	19.1915	48.518	110	76	141	31	77	165	88	1	0	0	1	1	0	0	2	0	0	0	1	1	2	0	0	0	1	1	2	0	0	0	0	1	1	2	0
2	3	5	1	0	14	2	18	0	93	93.1	155	93.05	30.2922	72.777	125	84	156	37	105	70	83	1	0	1	1	0	0	0	1	1	0	1	1	0	3	1	1	0	1	0	3	1	1	1	0	1	0	3	1
2	2	5	0	99	0	2	18	0	87.3	87.2	160	87.25	26.7113	68.381	115	67	151	65	74	58	114	1	1	1	0	0	0	0	1	0	1	0	0	0	1	0	1	1	0	0	2	0	0	0	1	0	0	1	0
2	3	5	0	99	0	1	19	0	92.3	91.7	177	92	21.9943	68.906	113	65	142	49	71	109	76	2	0	0	0	0	0	0	0	0	0	0	0	0	0	0	1	0	0	1	2	0	0	0	0	0	0	0	0
9	1	4	0	99	0	1	18	0	97.9	97.6	171	97.75	28.5654	83.528	130	74	185	39	109	184	97	1	0	1	1	1	0	1	2	1	0	0	1	1	3	1	1	0	1	1	3	1	1	0	0	1	1	3	1
5	1	2	0	99	0	1	18	0	84.9	85	180	84.95	21.8957	70.942	125	78	113	50	48	76	95	1	0	0	0	0	0	0	0	0	0	0	0	0	0	0	0	0	0	0	0	0	0	0	0	0	0	0	0
5	3	4	0	99	0	2	19	0	83.3	83.5	153	83.4	19.9667	46.74	103	64	166	57	98	55	87	2	0	1	0	0	0	0	0	0	0	0	0	0	0	0	0	0	0	0	0	0	0	0	0	0	0	0	0
5	3	2	0	99	0	1	19	0	86.9	86.5	181	86.7	21.474	70.351	112	64	167	56	92	94	68	2	0	0	0	0	0	0	0	0	0	0	0	0	0	0	0	0	0	0	0	0	0	0	0	0	0	0	0
2	3	99	0	99	23	2	18	0	72.7	72.6	156	72.65	19.9108	48.455	105	70	161	60	85	81	90	1	0	0	0	0	0	0	0	0	0	0	0	0	0	0	0	0	0	0	0	0	0	0	0	0	0	0	0
2	2	2	0	99	0	1	19	0	84.9	84.6	172	84.75	21.1922	62.695	110	68	150	34	80	178	86	2	0	0	1	1	0	0	2	0	0	0	1	1	2	0	0	0	1	1	2	0	0	0	0	1	1	2	0
5	3	3	0	99	0	2	18	0	68	68.3	156	68.15	16.3367	39.757	94	63	161	50	100	56	105	1	1	0	0	0	0	0	1	0	0	0	0	0	0	0	0	0	0	0	0	0	0	0	0	0	0	0	0
2	3	4	0	99	10	2	19	0	98.7	99.2	157	98.95	31.8609	78.534	118	70	159	8	92	297	85	2	0	1	1	1	0	1	2	1	0	0	1	1	3	1	1	0	1	1	3	1	1	0	0	1	1	3	1
9	1	2	0	99	0	2	19	0	77.3	77.2	161	77.25	19.8692	51.503	103	60	229	109	103	85	123	2	1	0	0	0	0	0	1	0	1	0	0	0	1	0	0	1	0	0	1	0	0	0	1	0	0	1	0
5	3	4	0	99	9	1	18	0	83	84	177	83.5	20.7862	65.121	119	79	138	48	70	101	98	1	0	0	0	0	0	0	0	0	0	0	0	0	0	0	0	0	0	1	1	0	0	0	0	0	0	0	0
5	2	4	0	99	0	2	19	0	77	77.7	173	77.35	19.8677	59.462	104	68	143	64	68	56	86	2	0	0	0	0	0	0	0	0	0	0	0	0	0	0	0	0	0	0	0	0	0	0	0	0	0	0	0
5	1	2	0	99	6	2	18	0	94.2	94.5	165	94.35	22.169	60.355	114	69	178	58	103	83	95	1	0	1	0	0	0	0	0	1	0	0	0	0	1	0	1	0	0	0	1	0	1	0	0	0	0	1	0
9	3	3	0	99	0	2	19	0	92	91.7	166	91.85	23.871	65.779	107	59	167	44	107	80	121	2	1	1	1	0	0	1	2	1	1	0	0	0	2	0	1	1	1	0	3	1	1	0	1	0	0	2	0
5	3	5	0	99	8	1	18	0	87.6	88.1	169	87.85	23.9911	68.521	127	73	169	45	109	76	116	1	1	0	0	0	0	0	1	0	1	0	0	0	1	0	1	1	0	0	2	0	0	0	1	0	0	1	0
2	2	99	1	1	8	2	19	0	75.2	75.5	162	75.35	20.7865	54.552	107	68	157	61	84	58	115	2	1	0	0	0	0	0	1	0	1	0	0	0	1	0	0	1	0	0	1	0	0	0	1	0	0	1	0
2	2	3	0	99	0	2	19	0	75.1	74.7	171	74.9	18.3448	53.642	96	67	222	93	125	72	81	2	0	0	0	0	0	0	0	0	0	0	0	0	0	0	0	0	0	0	0	0	0	0	0	0	0	0	0
5	3	2	0	99	0	2	18	0	72.2	73.1	171	72.65	17.4939	51.154	87	60	104	46	46	58	83	1	0	0	1	0	0	0	1	0	0	0	0	0	0	0	0	0	1	0	1	0	0	0	0	0	0	0	0
5	1	2	0	99	9	2	19	0	76.8	77.6	166	77.2	20.1448	55.511	95	63	154	52	84	90	145	2	1	0	0	0	0	0	1	0	1	0	0	0	1	0	0	1	0	0	1	0	0	0	1	0	0	1	0
5	3	2	0	99	3	2	19	0	89.6	89.9	167	89.75	20.4224	56.956	101	70	129	59	59	53	79	2	0	1	0	0	0	0	0	0	0	0	0	0	0	0	1	0	0	0	1	0	0	0	0	0	0	0	0
5	3	0	0	99	0	2	19	0	83.7	83.1	158	83.4	24.0198	59.963	138	107	229	74	136	97	78	2	0	1	0	0	1	0	1	0	0	0	0	0	0	0	0	0	0	0	0	0	0	1	0	0	0	1	0
5	3	1	0	99	0	2	19	0	70.5	71.4	155	70.95	18.9732	45.583	91	59	101	29	62	49	92	2	0	0	1	0	0	0	1	0	0	0	1	0	1	0	0	0	1	0	1	0	0	0	0	1	0	1	0
5	2	99	0	99	0	1	19	0	79.5	79.8	172	79.65	18.463	54.621	105	58	31	51	69	53	100	2	1	0	0	0	0	0	1	0	0	0	0	0	0	0	0	0	0	0	0	0	0	0	0	0	0	0	0
2	3	3	1	1	9	2	19	0	98.1	98.6	164	98.35	28.9039	77.74	114	71	197	44	110	214	99	2	0	1	1	1	0	1	2	1	0	0	0	1	2	0	1	0	1	1	3	1	1	0	0	0	1	2	0
5	3	3	1	0	22	2	19	0	79.2	80	158	79.6	27.1924	67.883	105	63	196	71	108	84	82	2	0	0	0	0	0	0	0	0	0	0	0	0	0	0	0	0	0	0	0	0	0	0	0	0	0	0	0
5	1	3	0	99	0	2	19	0	94.4	93.9	175	94.15	26.8882	82.345	113	74	178	77	88	65	89	2	0	1	0	0	0	0	0	1	0	0	0	0	1	0	1	0	0	0	1	0	1	0	0	0	0	1	0
5	1	0	0	99	8	1	19	0	80.6	80	183.5	80.3	19.0335	64.09	132	72	133	40	75	88	75	2	0	0	0	0	0	0	0	0	0	0	1	0	1	0	0	0	1	0	1	0	0	1	0	1	0	2	0
5	3	4	0	99	0	1	19	0	74.8	74	163.5	74.4	18.9894	50.763	115	70	119	26	79	69	103	2	1	0	1	0	0	0	2	0	0	0	1	0	1	0	0	0	1	0	1	0	0	0	0	1	0	1	0
5	3	3	0	99	0	2	19	0	78.7	78.5	168.5	78.6	18.5209	52.585	105	74	158	74	67	85	90	2	0	0	0	0	0	0	0	0	0	0	0	0	0	0	0	0	0	0	0	0	0	0	0	0	0	0	0
5	1	4	1	0	0	2	19	0	75.9	75.6	162	75.75	17.6345	46.28	106	69	159	68	77	72	82	2	0	0	0	0	0	0	0	0	0	0	0	0	0	0	0	0	0	0	0	0	0	0	0	0	0	0	0
2	1	4	0	99	4	2	18	0	77.4	78.2	154.5	77.8	22.1577	52.891	118	74	148	46	87	75	88	1	0	0	1	0	0	0	1	0	0	0	0	0	0	0	0	0	1	0	1	0	0	0	0	0	0	0	0
5	2	4	0	99	0	1	19	0	99.9	100.8	175.5	100.35	27.6861	85.274	135	87	121	55	49	87	77	2	0	1	0	0	1	0	1	1	0	0	0	0	1	0	1	0	0	0	1	0	1	1	0	0	0	2	0
5	1	2	0	99	10	1	19	0	90.2	90.3	165	90.25	26.1752	71.262	124	62	136	55	63	92	91	2	0	0	0	0	0	0	0	0	0	0	0	0	0	0	1	0	0	0	1	0	0	0	0	0	0	0	0
5	3	4	0	99	0	2	19	0	72.3	72	161	72.15	18.6112	48.242	109	75	157	67	83	34	89	2	0	0	0	0	0	0	0	0	0	0	0	0	0	0	0	0	0	0	0	0	0	0	0	0	0	0	0
5	1	1	0	99	11	1	18	0	105.4	105.5	182	105.45	28.8576	95.588	150	78	162	56	93	63	131	1	1	1	0	0	0	0	1	1	1	0	0	0	2	0	1	1	0	0	2	0	1	1	1	0	0	3	1
5	3	4	0	99	0	1	19	0	80	79.8	175.8	79.9	18.6286	57.573	112	64	120	44	65	54	90	2	0	0	0	0	0	0	0	0	0	0	0	0	0	0	0	0	1	0	1	0	0	0	0	0	0	0	0
5	2	3	0	99	7	1	19	0	83.6	83.2	175.5	83.4	19.1287	58.917	122	70	177	58	104	77	102	2	1	0	0	0	0	0	1	0	0	0	0	0	0	0	0	0	0	0	0	0	0	0	0	0	0	0	0
5	2	4	0	99	0	2	19	0	73.4	74.1	159.5	73.75	19.9546	50.765	96	54	109	51	50	39	81	2	0	0	0	0	0	0	0	0	0	0	0	0	0	0	0	0	0	0	0	0	0	0	0	0	0	0	0
5	1	0	0	99	21	1	19	0	99.3	100.1	178	99.7	27.5773	87.376	126	65	184	50	120	68	84	2	0	1	0	0	0	0	0	1	0	0	0	0	1	0	1	0	0	0	1	0	1	0	0	0	0	1	0
5	3	0	0	99	0	2	19	0	91.4	90.6	159	91	25.1161	63.496	150	96	259	76	150	165	94	2	0	1	0	1	1	1	2	0	0	0	0	1	1	0	1	0	0	1	2	0	0	1	0	0	1	2	0
5	1	3	0	99	0	1	18	0	73.6	74.1	181	73.85	17.3499	56.84	106	59	131	58	52	105	96	1	0	0	0	0	0	0	0	0	0	0	0	0	0	0	0	0	0	1	1	0	0	0	0	0	0	0	0
5	3	0	0	99	4	2	19	0	75.5	76.2	157	75.85	19.1448	47.19	101	66	154	59	79	79	90	2	0	0	0	0	0	0	0	0	0	0	0	0	0	0	0	0	0	0	0	0	0	0	0	0	0	0	0
5	2	3	0	99	0	2	19	0	79.1	79.2	161	79.15	19.6235	50.866	89	60	173	48	116	47	86	2	0	0	1	0	0	0	1	0	0	0	0	0	0	0	0	0	1	0	1	0	0	0	0	0	0	0	0
5	1	3	0	99	0	2	19	0	95.5	96.3	155	95.9	28.1702	67.679	113	76	246	48	132	330	92	2	0	1	1	1	0	1	2	1	0	0	0	1	2	0	1	0	1	1	3	1	1	0	0	0	1	2	0
2	3	3	0	99	16	2	18	0	95.5	96	170	95.75	28.7747	83.159	109	69	159	60	86	67	101	1	1	1	0	0	0	0	1	1	0	0	0	0	1	0	1	0	0	0	1	0	1	0	0	0	0	1	0
5	1	2	1	0	14	1	18	0	80.1	80.8	177	80.45	18.0797	56.642	110	71	121	63	30	140	92	1	0	0	0	0	0	0	0	0	0	0	0	1	1	0	0	0	0	1	1	0	0	0	0	0	1	1	0
5	3	3	0	99	0	2	19	0	82.6	83.6	168.7	83.1	20.0933	57.185	111	79	185	78	98	45	81	2	0	1	0	0	0	0	0	0	0	0	0	0	0	0	0	0	0	0	0	0	0	0	0	0	0	0	0
2	2	4	0	99	0	2	19	0	65.3	65.6	156	65.45	15.6558	38.1	97	67	201	61	119	106	84	2	0	0	0	0	0	0	0	0	0	0	0	0	0	0	0	0	0	1	1	0	0	0	0	0	0	0	0
5	1	1	0	99	2	2	19	0	73.7	73	164	73.35	18.85	50.699	112	73	154	53	87	71	82	2	0	0	0	0	0	0	0	0	0	0	0	0	0	0	0	0	0	0	0	0	0	0	0	0	0	0	0
5	2	5	0	99	5	1	19	0	77.7	77.8	176.5	77.75	18.6308	58.039	119	70	148	56	83	44	99	2	0	0	0	0	0	0	0	0	0	0	0	0	0	0	0	0	0	0	0	0	0	0	0	0	0	0	0
5	2	1	0	99	8	2	19	0	76.5	77.2	162.5	76.85	21.2916	56.223	108	66	138	56	73	45	83	2	0	0	0	0	0	0	0	0	0	0	0	0	0	0	0	0	0	0	0	0	0	0	0	0	0	0	0
5	3	1	0	99	0	1	19	0	92.4	93	177	92.7	26.5773	83.264	142	76	118	41	65	62	92	2	0	0	0	0	0	0	0	0	0	0	0	0	0	0	1	0	1	0	2	0	0	1	0	0	0	1	0
5	3	2	0	99	0	2	19	0	75.3	74.7	169	75	18.1436	51.82	119	79	142	58	68	79	94	2	0	0	0	0	0	0	0	0	0	0	0	0	0	0	0	0	0	0	0	0	0	0	0	0	0	0	0
5	3	2	0	99	9	2	19	0	76.2	76.4	160	76.3	20.3324	52.051	96	67	159	68	75	80	86	2	0	0	0	0	0	0	0	0	0	0	0	0	0	0	0	0	0	0	0	0	0	0	0	0	0	0	0
5	1	5	0	99	0	2	19	0	67.2	67.1	168.6	67.15	15.2589	43.375	94	61	161	58	93	49	84	2	0	0	0	0	0	0	0	0	0	0	0	0	0	0	0	0	0	0	0	0	0	0	0	0	0	0	0
5	3	1	0	99	0	2	18	0	83.7	83.5	163	83.6	22.186	58.946	121	85	188	48	123	84	87	1	0	1	1	0	0	0	1	0	0	1	0	0	1	0	0	0	1	0	2	0	0	1	0	0	0	1	0
5	1	2	0	99	2	1	18	0	91	91.1	174	91.05	23.9104	72.391	116	58	141	48	80	63	106	1	1	0	0	0	0	0	1	0	0	0	0	0	0	0	1	0	0	0	1	0	0	0	0	0	0	0	0
5	3	3	0	99	0	1	18	0	77.6	78.4	183	78	17.7476	59.435	122	68	162	52	99	54	78	1	0	0	0	0	0	0	0	0	0	0	0	0	0	0	0	0	0	0	0	0	0	0	0	0	0	0	0
5	1	3	0	99	0	1	19	0	82.2	82.9	174.5	82.55	20.6832	62.981	118	71	155	44	86	127	90	2	0	0	0	0	0	0	0	0	0	0	0	1	1	0	0	0	1	1	2	0	0	0	0	0	1	1	0
5	3	2	0	99	0	2	19	0	78.7	79.2	157.7	78.95	22.769	56.625	91	59	173	44	115	71	92	2	0	0	1	0	0	0	1	0	0	0	0	0	0	0	0	0	1	0	1	0	0	0	0	0	0	0	0
5	3	3	0	99	0	2	19	0	86.1	85.9	162	86	26.2346	68.85	97	61	185	40	123	109	88	2	0	1	1	0	0	0	1	0	0	0	1	0	1	0	1	0	1	1	3	1	0	0	0	1	0	1	0
5	1	1	0	99	0	2	19	0	75.2	75.9	166	75.55	21.2912	58.67	114	73	232	57	161	70	89	2	0	0	0	0	0	0	0	0	0	0	0	0	0	0	0	0	0	0	0	0	0	0	0	0	0	0	0
5	3	4	0	99	0	2	19	0	67.6	67.5	161.5	67.55	14.6843	38.3	107	84	136	65	53	88	85	2	0	0	0	0	0	0	0	0	0	0	0	0	0	0	0	0	0	0	0	0	0	1	0	0	0	1	0
5	1	1	0	99	3	2	19	0	78.1	78.4	163	78.25	22.1032	58.726	109	68	130	56	54	101	95	2	0	0	0	0	0	0	0	0	0	0	0	0	0	0	0	0	0	1	1	0	0	0	0	0	0	0	0
5	2	5	0	99	2	2	19	0	71.3	71.9	159.5	71.6	17.9908	45.769	96	64	167	59	90	89	99	2	0	0	0	0	0	0	0	0	0	0	0	0	0	0	0	0	0	0	0	0	0	0	0	0	0	0	0
99	3	5	0	99	0	2	19	0	75	74.7	165	74.85	17.5658	47.823	109	66	190	72	105	66	103	2	1	0	0	0	0	0	1	0	0	0	0	0	0	0	0	0	0	0	0	0	0	0	0	0	0	0	0
5	1	3	0	99	0	2	19	0	74.4	73.9	163	74.15	19.1991	51.01	99	62	160	63	80	84	93	2	0	0	0	0	0	0	0	0	0	0	0	0	0	0	0	0	0	0	0	0	0	0	0	0	0	0	0
5	3	2	0	99	11	2	19	0	77.6	76.9	162	77.25	22.8578	59.988	112	75	230	61	147	110	75	2	0	0	0	0	0	0	0	0	0	0	0	1	1	0	0	0	0	1	1	0	0	0	0	0	1	1	0
5	1	0	0	99	0	2	19	0	91.2	92.1	160	91.65	24.757	63.378	111	70	163	45	100	89	102	2	1	1	1	0	0	1	2	0	0	0	0	0	0	0	1	0	1	0	2	0	0	0	0	0	0	0	0
5	3	2	0	99	5	2	19	0	76.6	77.4	160	77	22.7402	58.215	97	58	119	59	46	68	81	2	0	0	0	0	0	0	0	0	0	0	0	0	0	0	0	0	0	0	0	0	0	0	0	0	0	0	0
5	2	4	0	99	2	1	19	0	78.1	77.7	169	77.9	20.8249	59.478	128	80	92	33	52	37	81	2	0	0	1	0	0	0	1	0	0	0	1	0	1	0	0	0	1	0	1	0	0	1	0	1	0	2	0
5	3	4	0	99	0	2	19	0	78.4	77.4	162	77.9	21.0963	55.365	107	76	244	71	33	202	78	2	0	0	0	1	0	0	1	0	0	0	0	1	1	0	0	0	0	1	1	0	0	0	0	0	1	1	0
2	1	2	1	0	18	1	18	0	79.5	78.5	176	79	20.2441	62.708	113	70	102	32	57	65	87	1	0	0	1	0	0	0	1	0	0	0	1	0	1	0	0	0	1	0	1	0	0	0	0	1	0	1	0
5	1	2	0	99	0	2	19	0	85	85.6	164	85.3	26.7445	71.932	116	67	158	46	94	91	86	2	0	1	1	0	0	0	1	0	0	0	0	0	0	0	0	0	1	0	1	0	0	0	0	0	0	0	0
9	2	3	0	99	0	1	19	0	94.2	94.9	170	94.55	29.0938	84.081	118	69	167	55	101	53	83	2	0	1	0	0	0	0	0	0	0	0	0	0	0	0	1	0	0	0	1	0	0	0	0	0	0	0	0
4	2	99	0	99	2	2	19	0	81.7	81.9	165	81.8	20.7669	56.538	109	72	172	35	116	106	95	2	0	1	1	0	0	0	1	0	0	0	1	0	1	0	0	0	1	1	2	0	0	0	0	1	0	1	0
5	1	4	0	99	0	1	19	0	72	72.3	169	72.15	17.1524	48.989	120	72	161	60	90	56	93	2	0	0	0	0	0	0	0	0	0	0	0	0	0	0	0	0	0	0	0	0	0	0	0	0	0	0	0
2	3	5	0	99	0	2	19	0	67.3	66.9	154	67.1	17.1226	40.608	99	68	121	58	54	45	91	2	0	0	0	0	0	0	0	0	0	0	0	0	0	0	0	0	0	0	0	0	0	0	0	0	0	0	0
2	3	99	1	0	8	1	19	0	77.6	78.1	167	77.85	19.5073	54.404	108	63	137	52	76	47	81	2	0	0	0	0	0	0	0	0	0	0	0	0	0	0	0	0	0	0	0	0	0	0	0	0	0	0	0
5	3	1	0	99	17	2	18	0	66.4	66.7	157	66.55	18.1439	44.723	97	64	150	55	84	54	104	1	1	0	0	0	0	0	1	0	0	0	0	0	0	0	0	0	0	0	0	0	0	0	0	0	0	0	0
5	3	4	0	99	3	2	19	0	76.9	77.6	168	77.25	21.0381	59.378	105	66	146	45	93	39	95	2	0	0	1	0	0	0	1	0	0	0	0	0	0	0	0	0	1	0	1	0	0	0	0	0	0	0	0
2	3	5	1	0	12	1	19	0	81.8	81.7	170	81.75	21.5851	62.381	139	79	157	46	94	85	96	2	0	0	0	0	0	0	0	0	0	0	0	0	0	0	0	0	0	0	0	0	0	1	0	0	0	1	0
2	3	4	0	99	0	2	18	0	94	93.6	164	93.8	25.831	69.475	127	67	181	39	124	88	95	1	0	1	1	0	0	0	1	1	0	0	1	0	2	0	1	0	1	0	2	0	1	0	0	1	0	2	0
5	2	3	0	99	0	1	18	0	93.4	93.3	176.2	93.35	24.169	75.036	110	62	211	56	122	163	78	1	0	0	0	1	0	0	1	0	0	0	0	1	1	0	1	0	0	1	2	0	0	0	0	0	1	1	0
5	1	4	0	99	2	2	19	0	65.3	65	147	65.15	19.3202	41.749	98	61	122	68	43	54	90	2	0	0	0	0	0	0	0	0	0	0	0	0	0	0	0	0	0	0	0	0	0	0	0	0	0	0	0
5	2	5	0	99	0	2	18	0	87.5	87.2	150	87.35	26.5907	59.829	122	84	133	44	78	54	87	1	0	1	1	0	0	0	1	0	0	0	0	0	0	0	1	0	1	0	2	0	0	1	0	0	0	1	0
5	1	3	0	99	0	2	19	0	72.9	72.9	157	72.9	17.6721	43.56	95	68	176	58	106	58	97	2	0	0	0	0	0	0	0	0	0	0	0	0	0	0	0	0	0	0	0	0	0	0	0	0	0	0	0
5	2	2	0	99	0	2	18	0	86	85.6	163.5	85.8	24.5116	65.525	113	73	141	68	65	38	79	1	0	1	0	0	0	0	0	0	0	0	0	0	0	0	1	0	0	0	1	0	0	0	0	0	0	0	0
5	3	3	0	99	5	1	19	0	94.2	94.7	179.5	94.45	27.6602	89.122	118	69	176	59	94	113	98	2	0	1	0	0	0	0	0	0	0	0	0	1	1	0	1	0	0	1	2	0	0	0	0	0	1	1	0
5	3	3	0	99	0	2	19	0	66.4	65.9	153.5	66.15	15.6959	36.983	94	63	150	43	97	49	100	2	1	0	1	0	0	0	2	0	0	0	0	0	0	0	0	0	1	0	1	0	0	0	0	0	0	0	0
5	3	4	0	99	0	1	19	0	79	79.6	177	79.3	18.4752	57.881	130	83	139	47	67	123	97	2	0	0	0	0	0	0	0	0	0	0	0	1	1	0	0	0	0	1	1	0	0	1	0	0	1	2	0
5	3	3	0	99	16	2	19	0	81.4	81.2	167	81.3	21.4956	59.949	105	75	187	66	104	87	81	2	0	1	0	0	0	0	0	0	0	0	0	0	0	0	0	0	0	0	0	0	0	0	0	0	0	0	0
5	3	2	0	99	0	1	19	0	88.6	88.1	178	88.35	23.3244	73.901	134	84	164	61	91	58	96	2	0	0	0	0	0	0	0	0	0	0	0	0	0	0	0	0	0	0	0	0	0	1	0	0	0	1	0
5	2	3	0	99	0	2	19	0	75.8	75.6	165.6	75.7	20.1077	55.142	107	72	126	45	64	83	102	2	1	0	1	0	0	0	2	0	0	0	0	0	0	0	0	0	1	0	1	0	0	0	0	0	0	0	0
5	1	2	0	99	13	1	19	0	92.2	91.9	169.8	92.05	23.7753	68.549	126	78	135	45	78	58	93	2	0	0	0	0	0	0	0	0	0	0	0	0	0	0	1	0	0	0	1	0	0	0	0	0	0	0	0
5	3	0	0	99	0	2	18	0	73.5	73.7	160.5	73.6	17.8313	45.934	108	65	217	60	136	106	85	1	0	0	0	0	0	0	0	0	0	0	0	0	0	0	0	0	0	1	1	0	0	0	0	0	0	0	0
5	1	4	0	99	0	1	18	0	105.6	106	181	105.8	31.1373	102.009	129	84	158	28	70	302	106	1	1	1	1	1	0	1	3	1	0	0	1	1	3	1	1	0	1	1	3	1	1	1	0	1	1	4	1
5	1	99	0	99	0	2	19	0	68.3	69.2	165.6	68.75	18.19	49.883	91	60	132	53	72	35	91	2	0	0	0	0	0	0	0	0	0	0	0	0	0	0	0	0	0	0	0	0	0	0	0	0	0	0	0
5	3	0	0	99	6	2	19	0	76.4	76.1	157	76.25	19.7014	48.562	98	65	192	51	120	107	88	2	0	0	0	0	0	0	0	0	0	0	0	0	0	0	0	0	0	1	1	0	0	0	0	0	0	0	0
2	1	4	0	99	0	2	18	0	62.4	63.4	156	62.9	15.563	37.874	99	72	164	65	84	73	90	1	0	0	0	0	0	0	0	0	0	0	0	0	0	0	0	0	0	0	0	0	0	0	0	0	0	0	0
5	3	3	0	99	0	1	19	0	103.2	102.3	178.2	102.75	28.1815	89.491	134	78	233	46	161	132	93	2	0	1	0	0	0	0	0	1	0	0	0	1	2	0	1	0	0	1	2	0	1	1	0	0	1	3	1
5	2	1	0	99	0	2	18	0	94.9	95.6	163.5	95.25	27.6015	73.785	123	77	174	51	106	84	102	1	1	1	0	0	0	0	1	1	0	0	0	0	1	0	1	0	0	0	1	0	1	0	0	0	0	1	0
5	3	2	0	99	0	2	18	0	70.3	70.8	145	70.55	18.9336	39.808	111	69	179	63	104	61	90	1	0	0	0	0	0	0	0	0	0	0	0	0	0	0	0	0	0	0	0	0	0	0	0	0	0	0	0
5	3	2	0	99	0	2	19	0	70.5	70.7	158	70.6	19.5766	48.871	101	65	127	55	60	61	84	2	0	0	0	0	0	0	0	0	0	0	0	0	0	0	0	0	0	0	0	0	0	0	0	0	0	0	0
5	1	0	0	99	0	2	19	0	94.8	94.6	170	94.7	26.6637	77.058	109	66	172	41	116	76	80	2	0	1	1	0	0	0	1	1	0	0	0	0	1	0	1	0	1	0	2	0	1	0	0	0	0	1	0
5	1	2	0	99	2	2	18	0	73.2	74.2	152	73.7	20.5246	47.42	101	67	166	55	96	73	107	1	1	0	0	0	0	0	1	0	0	0	0	0	0	0	0	0	0	0	0	0	0	0	0	0	0	0	0
4	1	99	0	99	4	1	19	0	82.3	82.8	180	82.55	20.9889	68.004	110	64	157	40	104	66	88	2	0	0	0	0	0	0	0	0	0	0	1	0	1	0	0	0	1	0	1	0	0	0	0	1	0	1	0
5	3	3	0	99	5	1	19	0	75.7	75	166	75.35	20.0105	55.141	108	62	149	40	88	105	121	2	1	0	0	0	0	0	1	0	1	0	1	0	2	0	0	1	1	1	3	1	0	0	1	1	0	2	0
2	1	4	0	99	0	1	19	0	69.4	69.7	174	69.55	16.6802	50.501	126	77	126	38	74	72	139	2	1	0	1	0	0	0	2	0	1	0	1	0	2	0	0	1	1	0	2	0	0	0	1	1	0	2	0
2	1	3	0	99	0	1	19	0	81.8	81.3	171	81.55	19.9107	58.221	112	61	166	66	90	52	89	2	0	0	0	0	0	0	0	0	0	0	0	0	0	0	0	0	0	0	0	0	0	0	0	0	0	0	0
4	3	99	0	99	0	1	18	0	76.7	77.4	177	77.05	18.0022	56.399	123	61	135	47	62	132	90	1	0	0	0	0	0	0	0	0	0	0	0	1	1	0	0	0	0	1	1	0	0	0	0	0	1	1	0
5	1	2	0	99	0	2	19	0	71.6	72.4	165	72	15.6525	42.614	92	61	131	57	63	55	49	2	0	0	0	0	0	0	0	0	0	0	0	0	0	0	0	0	0	0	0	0	0	0	0	0	0	0	0
2	3	4	0	99	0	1	19	0	82.8	83.4	173	83.1	18.6181	55.722	138	75	147	46	84	84	92	2	0	0	0	0	0	0	0	0	0	0	0	0	0	0	0	0	0	0	0	0	0	1	0	0	0	1	0
9	3	99	0	99	0	2	19	0	80.6	81.3	158	80.95	23.5275	58.734	105	72	195	52	128	73	84	2	0	1	0	0	0	0	0	0	0	0	0	0	0	0	0	0	0	0	0	0	0	0	0	0	0	0	0
2	3	3	0	99	9	1	19	0	90.7	90.1	180	90.4	23.3895	75.782	131	73	189	50	105	171	99	2	0	0	0	1	0	0	1	0	0	0	0	1	1	0	1	0	0	1	2	0	0	1	0	0	1	2	0
5	3	4	0	99	0	2	18	0	68	67.2	163	67.6	17.2118	45.73	100	57	187	57	113	87	87	1	0	0	0	0	0	0	0	0	0	0	0	0	0	0	0	0	0	0	0	0	0	0	0	0	0	0	0
2	3	0	0	99	0	1	19	0	77.4	77.3	180	77.35	19.2676	62.427	115	66	186	72	102	58	90	2	0	0	0	0	0	0	0	0	0	0	0	0	0	0	0	0	0	0	0	0	0	0	0	0	0	0	0
5	3	1	0	99	3	2	19	0	88.7	88.1	166	88.4	21.9125	60.382	97	61	124	44	68	61	89	2	0	1	1	0	0	0	1	0	0	0	0	0	0	0	1	0	1	0	2	0	0	0	0	0	0	0	0
5	1	2	0	99	0	2	19	0	67	66.8	158	66.9	16.6468	41.557	98	71	202	67	121	72	141	2	1	0	0	0	0	0	1	0	1	0	0	0	1	0	0	1	0	0	1	0	0	0	1	0	0	1	0
9	1	4	0	99	0	2	18	0	76.6	76.6	167	76.6	17.873	49.846	121	83	173	61	99	63	91	1	0	0	0	0	0	0	0	0	0	0	0	0	0	0	0	0	0	0	0	0	0	1	0	0	0	1	0
2	3	2	0	99	16	1	19	0	74.1	75.1	180	74.6	17.8731	57.909	110	65	111	55	44	62	108	2	1	0	0	0	0	0	1	0	0	0	0	0	0	0	0	0	0	0	0	0	0	0	0	0	0	0	0
9	3	2	0	99	0	1	19	0	89.1	89	169	89.05	25.1112	71.72	139	80	133	48	69	78	93	2	0	0	0	0	0	0	0	0	0	0	0	0	0	0	0	0	0	0	0	0	0	1	0	0	0	1	0
2	1	3	0	99	0	1	18	0	88	88.2	182	88.1	22.5254	74.613	127	70	236	54	142	201	92	1	0	0	0	1	0	0	1	0	0	0	0	1	1	0	1	0	0	1	2	0	0	0	0	0	1	1	0
5	1	0	0	99	5	2	18	0	79.1	78.8	159	78.95	21.9394	55.465	102	62	112	56	48	42	91	1	0	0	0	0	0	0	0	0	0	0	0	0	0	0	0	0	0	0	0	0	0	0	0	0	0	0	0
5	3	3	0	99	7	2	19	0	80.7	81.6	158.5	81.15	22.0828	55.477	106	63	172	82	80	50	78	2	0	1	0	0	0	0	0	0	0	0	0	0	0	0	0	0	0	0	0	0	0	0	0	0	0	0	0
5	3	1	0	99	0	1	18	0	106.4	106.4	185	106.4	27.8291	95.245	130	73	166	49	90	134	93	1	0	1	0	0	0	0	0	1	0	0	0	1	2	0	1	0	0	1	2	0	1	0	0	0	1	2	0
5	3	1	0	99	0	1	18	0	103.8	102.8	192	103.3	27.012	99.577	139	89	179	43	108	142	93	1	0	1	0	0	1	0	1	1	0	1	0	1	3	1	1	0	1	1	4	1	1	1	0	0	1	3	1
5	3	0	0	99	2	1	19	0	83.2	83.7	172.2	83.45	18.641	55.276	121	72	201	46	135	102	91	2	0	0	0	0	0	0	0	0	0	0	0	0	0	0	0	0	0	1	1	0	0	0	0	0	0	0	0
5	2	2	0	99	0	1	19	0	73.7	73.6	173	73.65	19.2499	57.613	125	70	172	51	99	112	80	2	0	0	0	0	0	0	0	0	0	0	0	1	1	0	0	0	0	1	1	0	0	0	0	0	1	1	0
5	2	2	0	99	0	2	18	0	77.6	77.5	159	77.55	22.4979	56.877	100	63	183	59	111	63	109	1	1	0	0	0	0	0	1	0	0	0	0	0	0	0	0	0	0	0	0	0	0	0	0	0	0	0	0
5	1	1	0	99	0	2	19	0	83.3	83.3	156	83.3	21.4407	52.178	107	71	219	56	146	87	102	2	1	1	0	0	0	0	1	0	0	0	0	0	0	0	0	0	0	0	0	0	0	0	0	0	0	0	0
5	3	3	0	99	13	1	18	0	89.1	89.8	168	89.45	21.768	61.438	121	71	164	38	97	147	86	1	0	0	1	0	0	0	1	0	0	0	1	1	2	0	1	0	1	1	3	1	0	0	0	1	1	2	0
5	1	3	0	99	0	2	19	0	98.7	99.3	162	99	32.0778	84.185	114	93	154	30	102	108	72	2	0	1	1	0	0	0	1	1	0	0	1	0	2	0	1	0	1	1	3	1	1	1	0	1	0	3	1
5	1	3	0	99	3	2	19	0	91.2	90.4	163	90.8	26.2516	69.748	108	78	145	39	87	95	77	2	0	1	1	0	0	0	1	0	0	0	1	0	1	0	1	0	1	0	2	0	0	0	0	1	0	1	0
2	1	2	0	99	0	2	19	0	73.5	74.1	161	73.8	18.1953	47.164	105	68	170	68	91	53	78	2	0	0	0	0	0	0	0	0	0	0	0	0	0	0	0	0	0	0	0	0	0	0	0	0	0	0	0
5	3	3	0	99	0	2	19	0	78.6	78.8	165	78.7	17.5515	47.784	97	69	179	62	108	45	59	2	0	0	0	0	0	0	0	0	0	0	0	0	0	0	0	0	0	0	0	0	0	0	0	0	0	0	0
9	1	3	0	99	3	1	19	0	80.3	79.9	187	80.1	21.4527	75.018	123	66	131	44	69	89	90	2	0	0	0	0	0	0	0	0	0	0	0	0	0	0	0	0	1	0	1	0	0	0	0	0	0	0	0
2	3	4	0	99	2	1	18	0	77	77.5	178.5	77.25	19.2927	61.471	120	78	166	49	98	97	93	1	0	0	0	0	0	0	0	0	0	0	0	0	0	0	0	0	0	0	0	0	0	0	0	0	0	0	0
4	3	3	0	99	0	1	18	0	82	82.6	174	82.3	20.8505	63.127	124	69	124	54	51	93	135	1	1	0	0	0	0	0	1	0	1	0	0	0	1	0	0	1	0	0	1	0	0	0	1	0	0	1	0
2	3	5	0	99	0	1	19	0	80.2	79.7	171.2	79.95	21.1973	62.128	112	71	178	40	125	65	92	2	0	0	0	0	0	0	0	0	0	0	1	0	1	0	0	0	1	0	1	0	0	0	0	1	0	1	0
2	3	4	0	99	0	2	19	0	93.2	92.8	165	93	27.9247	76.025	109	77	135	60	65	49	85	2	0	1	0	0	0	0	0	1	0	0	0	0	1	0	1	0	0	0	1	0	1	0	0	0	0	1	0
5	2	4	0	99	8	2	18	0	76	76.8	161	76.4	21.4648	55.639	107	54	138	43	84	55	93	1	0	0	1	0	0	0	1	0	0	0	0	0	0	0	0	0	1	0	1	0	0	0	0	0	0	0	0
2	1	2	0	99	0	2	18	0	94.4	94.2	162	94.3	26.8099	70.36	114	67	156	50	85	106	92	1	0	1	0	0	0	0	0	1	0	0	0	0	1	0	1	0	0	1	2	0	1	0	0	0	0	1	0
9	3	4	0	99	10	2	18	0	79	78.2	154.5	78.6	19.2918	46.05	92	67	189	37	120	161	78	1	0	0	1	1	0	0	2	0	0	0	1	1	2	0	0	0	1	1	2	0	0	0	0	1	1	2	0
5	3	4	0	99	0	1	19	0	82.8	83.4	161.5	83.1	23.8139	62.112	113	62	144	39	93	60	91	2	0	0	1	0	0	0	1	0	0	0	1	0	1	0	0	0	1	0	1	0	0	0	0	1	0	1	0
2	3	2	0	99	0	2	19	0	80.4	81	159	80.7	20.6614	52.234	103	63	232	69	141	112	93	2	0	1	0	0	0	0	0	0	0	0	0	1	1	0	0	0	0	1	1	0	0	0	0	0	1	1	0
2	3	4	0	99	2	2	18	0	75.6	75.6	159	75.6	19.8086	50.078	102	64	136	45	82	45	97	1	0	0	1	0	0	0	1	0	0	0	0	0	0	0	0	0	1	0	1	0	0	0	0	0	0	0	0
2	3	4	0	99	0	1	19	0	76.9	77.5	169	77.2	18.9307	54.068	127	65	173	52	111	48	92	2	0	0	0	0	0	0	0	0	0	0	0	0	0	0	0	0	0	0	0	0	0	0	0	0	0	0	0
5	1	0	0	99	19	1	19	0	86.2	86.4	180	86.3	19.8907	64.446	100	68	124	45	61	88	80	2	0	0	0	0	0	0	0	0	0	0	0	0	0	0	0	0	0	0	0	0	0	0	0	0	0	0	0
5	3	1	0	99	0	1	18	0	84.1	84.2	166.2	84.15	24.4363	67.499	132	80	168	43	108	87	88	1	0	0	0	0	0	0	0	0	0	0	0	0	0	0	0	0	1	0	1	0	0	1	0	0	0	1	0
2	3	5	0	99	7	2	19	0	84.6	84.8	173.5	84.7	21.0838	63.467	107	69	175	91	73	57	135	2	1	1	0	0	0	0	1	0	1	0	0	0	1	0	0	1	0	0	1	0	0	0	1	0	0	1	0
5	2	2	0	99	1	1	19	0	97.9	96.9	182	97.4	25.4797	84.399	133	85	172	42	111	96	106	2	1	1	0	0	1	1	2	1	0	0	0	0	1	0	1	0	1	0	2	0	1	1	0	0	0	2	0
5	3	0	0	99	7	2	19	0	68.9	69.5	161.5	69.2	16.4307	42.855	99	68	194	87	93	70	89	2	0	0	0	0	0	0	0	0	0	0	0	0	0	0	0	0	0	0	0	0	0	0	0	0	0	0	0
2	3	3	0	99	0	2	19	0	82.8	82.3	163	82.55	21.2804	56.54	92	60	193	58	115	102	95	2	0	1	0	0	0	0	0	0	0	0	0	0	0	0	0	0	0	1	1	0	0	0	0	0	0	0	0
2	3	99	0	99	0	2	19	0	90.3	90.5	165	90.4	26.7545	72.839	123	75	239	94	127	92	100	2	1	1	0	0	0	0	1	0	0	0	0	0	0	0	1	0	0	0	1	0	0	0	0	0	0	0	0
2	3	5	0	99	0	2	19	0	78.7	78.4	153	78.55	19.3592	45.318	117	87	195	75	95	125	99	2	0	0	0	0	0	0	0	0	0	0	0	1	1	0	0	0	0	1	1	0	0	1	0	0	1	2	0
2	2	3	0	99	14	1	19	0	79.6	79.4	175.5	79.5	17.2122	53.014	114	65	136	52	79	27	116	2	1	0	0	0	0	0	1	0	1	0	0	0	1	0	0	1	0	0	1	0	0	0	1	0	0	1	0
5	1	2	0	99	4	2	18	0	81.7	81.7	157	81.7	20.6179	50.821	104	67	145	52	82	57	89	1	0	1	0	0	0	0	0	0	0	0	0	0	0	0	0	0	0	0	0	0	0	0	0	0	0	0	0
5	1	1	0	99	4	1	19	0	78.4	77.8	163	78.1	24.6532	65.501	112	71	190	49	101	199	89	2	0	0	0	1	0	0	1	0	0	0	0	1	1	0	0	0	0	1	1	0	0	0	0	0	1	1	0
2	3	3	0	99	0	2	19	0	79.9	79.5	179.5	79.7	19.6836	63.421	114	67	154	62	82	49	89	2	0	0	0	0	0	0	0	0	0	0	0	0	0	0	0	0	0	0	0	0	0	0	0	0	0	0	0
5	3	2	0	99	0	2	18	0	86.9	86.9	162	86.9	24.9154	65.388	122	79	166	35	116	73	91	1	0	1	1	0	0	0	1	0	0	1	1	0	2	0	1	0	1	0	3	1	0	0	0	1	0	1	0
5	3	3	0	99	6	2	18	0	74.2	74.6	155.5	74.4	20.2012	48.847	105	70	192	57	123	58	83	1	0	0	0	0	0	0	0	0	0	0	0	0	0	0	0	0	0	0	0	0	0	0	0	0	0	0	0
4	3	4	0	99	0	2	18	0	89.8	90	160.5	89.9	32.1674	82.864	120	69	140	62	68	50	106	1	1	1	0	0	0	0	1	0	0	0	0	0	0	0	1	0	0	0	1	0	0	0	0	0	0	0	0
5	1	2	0	99	5	2	18	0	84	84.9	168	84.45	23.2742	65.689	101	63	107	59	40	40	67	1	0	1	0	0	0	0	0	0	0	0	0	0	0	0	0	0	0	0	0	0	0	0	0	0	0	0	0
2	2	4	1	0	4	1	19	0	83.7	83.7	175.5	83.7	22.6722	69.831	119	69	136	39	78	94	100	2	1	0	1	0	0	0	2	0	0	0	1	0	1	0	0	0	1	0	1	0	0	0	0	1	0	1	0
3	2	4	0	99	10	2	19	0	83.1	83.5	163.5	83.3	22.6348	60.508	96	70	157	45	95	35	76	2	0	1	1	0	0	0	1	0	0	0	0	0	0	0	0	0	1	0	1	0	0	0	0	0	0	0	0
2	3	4	0	99	9	2	18	0	85.5	86.4	160.5	85.95	26.5424	68.374	117	70	153	58	79	78	82	1	0	1	0	0	0	0	0	0	0	0	0	0	0	0	1	0	0	0	1	0	0	0	0	0	0	0	0
2	3	99	0	99	4	2	19	0	81.8	81.4	169	81.6	19.7486	56.404	109	64	101	52	38	54	81	2	0	1	0	0	0	0	0	0	0	0	0	0	0	0	0	0	0	0	0	0	0	0	0	0	0	0	0
5	99	99	0	99	0	2	19	0	84.5	84.8	163.5	84.65	22.1676	59.259	112	77	101	44	47	50	82	2	0	1	1	0	0	0	1	0	0	0	0	0	0	0	0	0	1	0	1	0	0	0	0	0	0	0	0
5	3	5	0	99	3	2	18	0	72.8	72.8	160	72.8	19.8613	50.845	106	65	125	48	56	104	89	1	0	0	1	0	0	0	1	0	0	0	0	0	0	0	0	0	1	1	2	0	0	0	0	0	0	0	0
9	3	2	1	1	6	2	19	0	84.1	83.6	165	83.85	22.0298	59.976	97	66	156	48	90	89	79	2	0	1	1	0	0	0	1	0	0	0	0	0	0	0	0	0	1	0	1	0	0	0	0	0	0	0	0
5	3	3	0	99	0	1	19	0	82.8	83.5	176	83.15	20.5611	63.69	109	67	189	43	121	126	86	2	0	0	0	0	0	0	0	0	0	0	0	1	1	0	0	0	1	1	2	0	0	0	0	0	1	1	0
5	1	2	0	99	0	1	19	0	111.3	111.6	182.5	111.45	30.243	100.728	139	82	219	33	98	442	112	2	1	1	1	1	0	1	3	1	1	0	1	1	4	1	1	1	1	1	4	1	1	1	1	1	1	5	1
2	1	3	0	99	7	1	18	0	74.9	75.7	166	75.3	20.0316	55.199	136	84	163	63	78	112	87	1	0	0	0	0	0	0	0	0	0	1	0	1	2	0	0	0	0	1	2	0	0	1	0	0	1	2	0
5	1	1	0	99	0	2	19	0	86.7	86.7	165	86.7	26.3971	71.866	96	64	132	52	60	101	74	2	0	1	0	0	0	0	0	0	0	0	0	0	0	0	1	0	0	1	2	0	0	0	0	0	0	0	0
5	2	2	0	99	0	2	19	0	71.3	71.8	167	71.55	18.6299	51.957	120	80	182	65	107	49	93	2	0	0	0	0	0	0	0	0	0	0	0	0	0	0	0	0	0	0	0	0	0	1	0	0	0	1	0
5	1	4	0	99	7	2	18	0	91.5	91.5	158	91.5	28.8648	72.058	103	64	148	42	94	62	87	1	0	1	1	0	0	0	1	0	0	0	0	0	0	0	1	0	1	0	2	0	0	0	0	0	0	0	0
5	3	0	1	0	10	1	19	0	87.4	87.6	177	87.5	24.5769	76.997	129	65	181	73	92	79	95	2	0	0	0	0	0	0	0	0	0	0	0	0	0	0	0	0	0	0	0	0	0	0	0	0	0	0	0
5	2	3	0	99	8	1	19	0	92	92.5	174	92.25	24.2109	73.301	123	76	140	39	87	71	90	2	0	0	1	0	0	0	1	0	0	0	1	0	1	0	1	0	1	0	2	0	0	0	0	1	0	1	0
2	3	4	0	99	16	2	18	0	71.4	71.3	163	71.35	17.228	45.773	96	62	123	46	67	51	93	1	0	0	1	0	0	0	1	0	0	0	0	0	0	0	0	0	1	0	1	0	0	0	0	0	0	0	0
4	3	4	0	99	0	2	19	0	76.3	75.8	164.5	76.05	19.4858	52.729	118	89	146	41	92	63	87	2	0	0	1	0	0	0	1	0	0	0	0	0	0	0	0	0	1	0	1	0	0	1	0	0	0	1	0
5	2	3	0	99	0	1	19	0	84.8	84.2	175.5	84.5	21.6424	66.659	123	74	135	51	66	88	89	2	0	0	0	0	0	0	0	0	0	0	0	0	0	0	0	0	0	0	0	0	0	0	0	0	0	0	0
4	3	4	0	99	0	1	19	0	90.9	91.6	182	91.25	22.7726	75.432	107	68	141	34	85	111	101	2	1	0	1	0	0	0	2	0	0	0	1	1	2	0	1	0	1	1	3	1	0	0	0	1	1	2	0
9	3	0	0	99	0	1	18	0	94.8	93.8	170.5	94.3	26.5681	77.234	126	65	207	41	134	160	90	1	0	1	0	1	0	0	1	0	0	0	0	1	1	0	1	0	1	1	3	1	0	0	0	0	1	1	0
9	1	1	0	99	4	1	18	0	71.9	72.9	179	72.4	21.0927	67.583	136	73	136	32	88	79	83	1	0	0	1	0	0	0	1	0	0	0	1	0	1	0	0	0	1	0	1	0	0	1	0	1	0	2	0
5	1	5	0	99	0	2	19	0	72.4	72.7	161	72.55	18.8091	48.755	100	67	136	62	65	44	87	2	0	0	0	0	0	0	0	0	0	0	0	0	0	0	0	0	0	0	0	0	0	0	0	0	0	0	0
2	3	3	0	99	0	2	18	0	85.4	85.8	154.5	85.6	24.3215	58.056	105	66	143	43	87	63	88	1	0	1	1	0	0	0	1	0	0	0	0	0	0	0	1	0	1	0	2	0	0	0	0	0	0	0	0
2	3	5	0	99	0	1	19	0	89.5	89.5	169.5	89.5	26.4599	76.02	136	65	103	34	58	53	69	2	0	0	1	0	0	0	1	0	0	0	1	0	1	0	0	0	1	0	1	0	0	1	0	1	0	2	0
10	3	3	0	99	5	1	18	0	76.5	76.2	165.6	76.35	19.3383	53.032	116	76	99	47	41	55	112	1	1	0	0	0	0	0	1	0	1	0	0	0	1	0	0	1	0	0	1	0	0	0	1	0	0	1	0
2	3	4	0	99	0	2	19	0	75.1	74.2	160.5	74.65	18.9396	48.789	114	74	165	50	103	58	85	2	0	0	0	0	0	0	0	0	0	0	0	0	0	0	0	0	0	0	0	0	0	0	0	0	0	0	0
9	2	3	0	99	7	1	18	0	89	88.7	178	88.85	23.8407	75.537	147	86	183	68	107	40	106	1	1	0	0	0	1	0	2	0	0	1	0	0	1	0	1	0	0	0	2	0	0	1	0	0	0	1	0
5	2	2	0	99	3	2	19	0	86.5	85.8	173.5	86.15	23.4032	70.449	99	69	139	64	65	50	86	2	0	1	0	0	0	0	0	0	0	0	0	0	0	0	1	0	0	0	1	0	0	0	0	0	0	0	0
10	3	4	0	99	14	2	18	0	77.4	76.7	157	77.05	22.1867	54.688	108	81	191	56	90	223	81	1	0	0	0	1	0	0	1	0	0	0	0	1	1	0	0	0	0	1	1	0	0	1	0	0	1	2	0
4	1	3	0	99	0	1	19	0	89.8	89.6	165.5	89.7	23.5646	64.544	122	72	153	41	88	119	110	2	1	0	0	0	0	0	1	0	1	0	0	1	2	0	1	1	1	1	4	1	0	0	1	0	1	2	0
5	3	3	0	99	0	2	18	0	100.1	100	165.6	100.05	28.3255	77.678	115	81	195	44	130	103	78	1	0	1	1	0	0	0	1	1	0	0	0	0	1	0	1	0	1	1	3	1	1	1	0	0	0	2	0
5	3	3	0	99	0	1	19	0	75.7	75.7	172	75.7	19.5842	57.938	114	67	138	54	67	84	72	2	0	0	0	0	0	0	0	0	0	0	0	0	0	0	0	0	0	0	0	0	0	0	0	0	0	0	0
2	3	2	1	0	0	1	19	0	99.5	99.6	164.5	99.55	29.7695	80.557	132	87	199	46	120	165	89	2	0	1	0	1	1	1	2	1	0	0	0	1	2	0	1	0	0	1	2	0	1	1	0	0	1	3	1
2	3	3	0	99	0	2	19	0	73.7	73.3	168.5	73.5	17.2836	49.072	107	74	157	45	92	98	83	2	0	0	1	0	0	0	1	0	0	0	0	0	0	0	0	0	1	0	1	0	0	0	0	0	0	0	0
5	1	0	1	0	7	1	19	0	90.7	90.8	171	90.75	26.563	77.673	122	65	172	71	84	84	83	2	0	0	0	0	0	0	0	0	0	0	0	0	0	0	1	0	0	0	1	0	0	0	0	0	0	0	0
4	3	2	1	1	6	1	18	0	89.1	89.8	166.5	89.45	24.5889	68.166	115	71	160	41	100	94	86	1	0	0	0	0	0	0	0	0	0	0	0	0	0	0	1	0	1	0	2	0	0	0	0	0	0	0	0
4	1	2	0	99	5	2	19	0	86.9	87.1	165	87	20.7938	56.611	100	61	144	52	81	54	94	2	0	1	0	0	0	0	0	0	0	0	0	0	0	0	1	0	0	0	1	0	0	0	0	0	0	0	0
5	3	4	0	99	6	2	18	0	85.8	86.4	165	86.1	25.1666	68.516	122	69	127	38	59	150	82	1	0	1	1	1	0	1	2	0	0	0	1	1	2	0	1	0	1	1	3	1	0	0	0	1	1	2	0
9	3	99	0	99	0	1	19	0	79.6	79.6	180.1	79.6	19.2126	62.318	135	80	117	42	61	68	92	2	0	0	0	0	0	0	0	0	0	0	0	0	0	0	0	0	1	0	1	0	0	1	0	0	0	1	0
2	3	2	0	99	0	1	18	0	89.1	88.9	170.5	89	22.8574	66.447	124	70	133	54	57	109	83	1	0	0	0	0	0	0	0	0	0	0	0	0	0	0	1	0	0	1	2	0	0	0	0	0	0	0	0
2	3	2	1	0	0	2	19	0	82.4	82.8	154.5	82.6	22.2834	53.191	109	66	180	47	108	126	88	2	0	1	1	0	0	0	1	0	0	0	0	1	1	0	0	0	1	1	2	0	0	0	0	0	1	1	0
5	1	0	0	99	7	1	19	0	80.3	81.1	163	80.7	20.6508	54.867	118	76	163	54	88	105	80	2	0	0	0	0	0	0	0	0	0	0	0	0	0	0	0	0	0	1	1	0	0	0	0	0	0	0	0
5	1	1	0	99	11	1	19	0	80.6	81.2	177.8	80.9	21.161	66.896	119	70	159	47	94	92	92	2	0	0	0	0	0	0	0	0	0	0	0	0	0	0	0	0	0	0	0	0	0	0	0	0	0	0	0
5	3	2	0	99	0	2	19	0	82.6	83.6	164.4	83.1	23.0577	62.319	100	66	155	62	79	68	129	2	1	1	0	0	0	0	1	0	1	0	0	0	1	0	0	1	0	0	1	0	0	0	1	0	0	1	0
2	3	4	0	99	0	2	19	0	85.7	85.2	166	85.45	20.2816	55.888	96	63	132	48	73	55	102	2	1	1	1	0	0	1	2	0	0	0	0	0	0	0	0	0	1	0	1	0	0	0	0	0	0	0	0
2	3	3	0	99	6	2	19	0	81.9	82.1	160	82	22.716	58.153	107	76	144	37	91	82	75	2	0	1	1	0	0	0	1	0	0	0	1	0	1	0	0	0	1	0	1	0	0	0	0	1	0	1	0
5	3	2	0	99	0	1	19	0	83.4	82.6	170.5	83	19.0604	55.409	108	74	121	41	63	85	78	2	0	0	0	0	0	0	0	0	0	0	0	0	0	0	0	0	1	0	1	0	0	0	0	0	0	0	0
5	1	2	0	99	6	1	18	0	89.6	89.8	177	89.7	24.0678	75.402	124	60	140	42	80	89	95	1	0	0	0	0	0	0	0	0	0	0	0	0	0	0	1	0	1	0	2	0	0	0	0	0	0	0	0
5	2	4	0	99	0	2	19	0	98.7	99	175	98.85	29.3793	89.974	101	65	192	45	128	93	75	2	0	1	1	0	0	0	1	1	0	0	0	0	1	0	1	0	1	0	2	0	1	0	0	0	0	1	0
9	1	3	0	99	8	2	18	0	78	77.7	166	77.85	21.2484	58.552	96	60	122	57	46	96	89	1	0	0	0	0	0	0	0	0	0	0	0	0	0	0	0	0	0	0	0	0	0	0	0	0	0	0	0
2	3	3	0	99	0	1	18	0	75.8	75.6	170	75.7	20.2235	58.446	113	69	136	48	75	67	87	1	0	0	0	0	0	0	0	0	0	0	0	0	0	0	0	0	0	0	0	0	0	0	0	0	0	0	0
5	99	2	0	99	0	1	19	0	89.7	89.6	167	89.65	22.833	63.679	116	77	149	47	85	86	84	2	0	0	0	0	0	0	0	0	0	0	0	0	0	0	1	0	0	0	1	0	0	0	0	0	0	0	0
5	2	3	1	0	15	1	18	0	82.4	82.9	163	82.65	22.0945	58.703	124	68	143	55	67	103	118	1	1	0	0	0	0	0	1	0	1	0	0	0	1	0	0	1	0	1	2	0	0	0	1	0	0	1	0
5	1	0	0	99	0	2	19	0	94.3	95.2	167	94.75	26.8719	74.943	127	91	162	47	98	86	90	2	0	1	1	0	0	0	1	1	0	0	0	0	1	0	1	0	1	0	2	0	1	1	0	0	0	2	0
5	3	3	0	99	11	2	18	0	71.9	71.3	161.5	71.6	16.5595	43.191	95	62	126	47	62	85	85	1	0	0	1	0	0	0	1	0	0	0	0	0	0	0	0	0	1	0	1	0	0	0	0	0	0	0	0
5	3	3	0	99	0	1	18	0	89.4	89	182	89.2	22.1857	73.488	127	75	114	30	69	77	81	1	0	0	1	0	0	0	1	0	0	0	1	0	1	0	1	0	1	0	2	0	0	0	0	1	0	1	0
5	2	3	0	99	0	2	19	0	67.5	66.8	158.5	67.15	22.9904	57.757	105	75	196	71	114	54	81	2	0	0	0	0	0	0	0	0	0	0	0	0	0	0	0	0	0	0	0	0	0	0	0	0	0	0	0
5	3	2	0	99	0	2	19	0	80.5	79.9	160	80.2	21.8309	55.887	107	73	179	59	110	52	86	2	0	1	0	0	0	0	0	0	0	0	0	0	0	0	0	0	0	0	0	0	0	0	0	0	0	0	0
5	3	0	0	99	3	2	18	0	84.6	84.6	163.5	84.6	22.0505	58.946	119	75	123	61	55	36	98	1	0	1	0	0	0	0	0	0	0	0	0	0	0	0	1	0	0	0	1	0	0	0	0	0	0	0	0
5	3	5	0	99	0	2	18	0	73.4	73.5	158	73.45	17.0978	42.683	97	58	122	53	57	58	73	1	0	0	0	0	0	0	0	0	0	0	0	0	0	0	0	0	0	0	0	0	0	0	0	0	0	0	0
2	2	3	0	99	0	2	18	0	78.2	79.1	163.5	78.65	21.0764	56.342	104	70	193	62	114	87	107	1	1	0	0	0	0	0	1	0	0	0	0	0	0	0	0	0	0	0	0	0	0	0	0	0	0	0	0
5	3	3	0	99	5	1	19	0	79.5	79	182.5	79.25	19.5852	65.231	129	82	160	60	82	89	91	2	0	0	0	0	0	0	0	0	0	0	0	0	0	0	0	0	0	0	0	0	0	1	0	0	0	1	0
3	3	3	0	99	9	1	19	0	81.2	81.2	179.5	81.2	19.6395	63.279	120	67	148	32	75	205	89	2	0	0	1	1	0	0	2	0	0	0	1	1	2	0	0	0	1	1	2	0	0	0	0	1	1	2	0
2	3	4	99	99	0	1	18	0	83.3	82.3	170	82.8	19.1657	55.389	128	81	163	35	49	395	99	1	0	0	1	1	0	0	2	0	0	0	1	1	2	0	0	0	1	1	2	0	0	1	0	1	1	3	1
5	1	4	0	99	5	2	19	0	84.4	84.6	163	84.5	23.2056	61.655	109	72	147	50	85	58	74	2	0	1	0	0	0	0	0	0	0	0	0	0	0	0	0	0	0	0	0	0	0	0	0	0	0	0	0
2	3	5	0	99	15	1	19	0	100.1	100.1	165	100.1	27.6569	75.296	126	81	143	30	91	111	87	2	0	1	1	0	0	0	1	1	0	0	1	1	3	1	1	0	1	1	3	1	1	1	0	1	1	4	1
5	2	3	0	99	0	2	19	0	83.8	83.6	158.5	83.7	22.9904	57.757	111	72	223	54	154	75	93	2	0	1	0	0	0	0	0	0	0	0	0	0	0	0	0	0	0	0	0	0	0	0	0	0	0	0	0
5	3	2	0	99	0	1	19	0	77.3	77.9	183	77.6	18.4168	61.676	120	71	124	53	57	68	88	2	0	0	0	0	0	0	0	0	0	0	0	0	0	0	0	0	0	0	0	0	0	0	0	0	0	0	0
5	1	1	0	99	0	1	19	0	119.2	118.9	183	119.05	36.8793	123.505	154	83	187	53	100	168	81	2	0	1	0	1	0	0	1	1	0	0	0	1	2	0	1	0	0	1	2	0	1	1	0	0	1	3	1
5	1	1	0	99	6	1	18	0	72.4	73.4	171	72.9	17.4676	51.077	97	66	145	59	72	70	95	1	0	0	0	0	0	0	0	0	0	0	0	0	0	0	0	0	0	0	0	0	0	0	0	0	0	0	0
5	3	1	0	99	6	2	19	0	72.6	72.7	155.5	72.65	21.0957	51.01	102	67	165	51	93	103	87	2	0	0	0	0	0	0	0	0	0	0	0	0	0	0	0	0	0	1	1	0	0	0	0	0	0	0	0
5	2	5	0	99	0	2	19	0	78.7	78.5	156.5	78.6	21.3761	52.355	104	66	143	50	80	67	90	2	0	0	0	0	0	0	0	0	0	0	0	0	0	0	0	0	0	0	0	0	0	0	0	0	0	0	0
4	2	4	0	99	14	2	19	0	89.3	89	176.5	89.15	27.3505	85.203	113	76	209	71	118	98	116	2	1	1	0	0	0	0	1	0	1	0	0	0	1	0	1	1	0	0	2	0	0	0	1	0	0	1	0
2	2	4	0	99	0	2	19	0	65.1	65.3	161.5	65.2	18.8776	49.237	108	69	130	45	73	62	87	2	0	0	1	0	0	0	1	0	0	0	0	0	0	0	0	0	1	0	1	0	0	0	0	0	0	0	0
2	3	5	0	99	12	1	18	0	80.3	80.3	156.5	80.3	22.8072	55.86	130	63	179	55	106	89	125	1	1	0	0	0	0	0	1	0	1	0	0	0	1	0	0	1	0	0	1	0	0	0	1	0	0	1	0
2	3	5	0	99	0	1	19	0	89.5	89.5	175.5	89.5	25.2131	77.657	114	63	127	31	78	91	91	2	0	0	1	0	0	0	1	0	0	0	1	0	1	0	0	0	1	0	1	0	0	0	0	1	0	1	0
5	3	99	0	99	0	1	19	0	80.3	80	175.6	80.15	19.884	61.313	118	74	150	73	65	61	92	2	0	0	0	0	0	0	0	0	0	0	0	0	0	0	0	0	0	0	0	0	0	0	0	0	0	0	0
2	3	4	0	99	9	2	18	0	77.7	76.8	166	77.25	20.7073	57.061	111	68	165	58	90	86	95	1	0	0	0	0	0	0	0	0	0	0	0	0	0	0	0	0	0	0	0	0	0	0	0	0	0	0	0
2	2	5	0	99	0	1	18	0	73.5	72.8	164	73.15	22.4651	60.422	119	74	136	54	68	69	101	1	1	0	0	0	0	0	1	0	0	0	0	0	0	0	0	0	0	0	0	0	0	0	0	0	0	0	0
2	3	99	0	99	2	1	19	0	99.7	100.3	177.5	100	28.8209	90.804	138	83	93	44	31	92	74	2	0	1	0	0	0	0	0	1	0	0	0	0	1	0	1	0	1	0	2	0	1	1	0	0	0	2	0
9	2	1	0	99	0	1	18	0	83	82.9	166.1	82.95	22.2268	61.322	115	72	127	36	82	44	86	1	0	0	1	0	0	0	1	0	0	0	1	0	1	0	0	0	1	0	1	0	0	0	0	1	0	1	0
9	1	2	0	99	0	2	19	0	105.2	105.6	158	105.4	35.3874	88.341	115	70	239	35	142	311	110	2	1	1	1	1	0	1	3	1	1	0	1	1	4	1	1	1	1	1	4	1	1	0	1	1	1	4	1
9	1	1	0	99	0	2	18	0	89.4	88.9	169	89.15	24.3178	69.454	115	69	189	65	110	119	91	1	0	1	0	0	0	0	0	0	0	0	0	1	1	0	1	0	0	1	2	0	0	0	0	0	1	1	0
9	3	2	0	99	0	1	18	0	89.4	90	174.5	89.7	24.3239	74.067	113	66	146	55	81	50	82	1	0	0	0	0	0	0	0	0	0	0	0	0	0	0	1	0	0	0	1	0	0	0	0	0	0	0	0
2	1	2	0	99	0	2	18	0	80.9	81.6	160.5	81.25	24.1981	62.335	105	68	149	39	93	86	88	1	0	1	1	0	0	0	1	0	0	0	1	0	1	0	0	0	1	0	1	0	0	0	0	1	0	1	0
2	3	0	0	99	15	1	19	0	89.5	89.8	171	89.65	21.62	63.219	122	76	200	36	116	239	103	2	1	0	1	1	0	0	3	0	0	0	1	1	2	0	1	0	1	1	3	1	0	0	0	1	1	2	0
2	3	99	0	99	0	2	19	0	97.3	98.3	164	97.8	33.4823	90.054	119	68	157	61	87	46	92	2	0	1	0	0	0	0	0	1	0	0	0	0	1	0	1	0	0	0	1	0	1	0	0	0	0	1	0
2	1	5	0	99	0	1	19	0	91	91.3	172.5	91.15	24.0289	71.501	115	72	143	42	82	97	95	2	0	0	0	0	0	0	0	0	0	0	0	0	0	0	1	0	1	0	2	0	0	0	0	0	0	0	0
2	2	3	0	99	15	1	19	0	81.7	81	182.2	81.35	20.7167	68.773	122	72	122	45	66	53	97	2	0	0	0	0	0	0	0	0	0	0	0	0	0	0	0	0	0	0	0	0	0	0	0	0	0	0	0
2	3	5	0	99	10	2	18	0	98.6	98.7	156.2	98.65	31.2516	76.249	127	93	193	36	132	127	91	1	0	1	1	0	0	0	1	1	0	1	1	1	4	1	1	0	1	1	4	1	1	1	0	1	1	4	1
2	3	99	0	99	11	1	18	0	73.4	73	164.2	73.2	20.1942	54.447	114	65	140	53	75	61	86	1	0	0	0	0	0	0	0	0	0	0	0	0	0	0	0	0	0	0	0	0	0	0	0	0	0	0	0
2	1	3	0	99	0	2	19	0	71.6	71.9	155	71.75	19.3365	46.456	102	69	230	69	86	84	84	2	0	0	0	0	0	0	0	0	0	0	0	0	0	0	0	0	0	0	0	0	0	0	0	0	0	0	0
2	2	2	0	99	0	2	19	0	75.9	75.9	172	75.9	20.5936	60.924	103	66	179	55	107	87	94	2	0	0	0	0	0	0	0	0	0	0	0	0	0	0	0	0	0	0	0	0	0	0	0	0	0	0	0
9	2	2	0	99	0	2	19	0	76.9	76.8	171.5	76.85	23.0214	67.711	109	63	186	64	102	102	92	2	0	0	0	0	0	0	0	0	0	0	0	0	0	0	0	0	0	1	1	0	0	0	0	0	0	0	0
2	3	3	0	99	0	1	18	0	76.1	76	166.5	76.05	21.1383	58.6	116	68	129	46	74	44	79	1	0	0	0	0	0	0	0	0	0	0	0	0	0	0	0	0	0	0	0	0	0	0	0	0	0	0	0
5	3	99	0	99	0	1	19	0	78.4	78.3	167	78.35	19.8462	55.349	110	68	148	37	88	113	75	2	0	0	1	0	0	0	1	0	0	0	1	1	2	0	0	0	1	1	2	0	0	0	0	1	1	2	0
2	1	2	0	99	0	2	19	0	69.9	69.2	156.5	69.55	21.3468	52.283	115	73	134	62	64	41	98	2	0	0	0	0	0	0	0	0	0	0	0	0	0	0	0	0	0	0	0	0	0	0	0	0	0	0	0
5	2	3	0	99	7	1	19	0	80.6	81.5	171.5	81.05	22.2091	65.322	122	77	131	55	66	51	120	2	1	0	0	0	0	0	1	0	1	0	0	0	1	0	0	1	0	0	1	0	0	0	1	0	0	1	0
5	1	3	0	99	0	2	19	0	74.8	75	169.5	74.9	19.7663	56.789	98	63	158	58	87	66	84	2	0	0	0	0	0	0	0	0	0	0	0	0	0	0	0	0	0	0	0	0	0	0	0	0	0	0	0
5	1	99	0	99	3	1	19	0	83.8	83.7	183.2	83.75	22.2408	74.645	120	70	139	48	74	85	93	2	0	0	0	0	0	0	0	0	0	0	0	0	0	0	0	0	0	0	0	0	0	0	0	0	0	0	0
4	3	4	0	99	0	2	18	0	72.3	72.2	156.6	72.25	19.7785	48.504	104	66	164	50	100	69	88	1	0	0	0	0	0	0	0	0	0	0	0	0	0	0	0	0	0	0	0	0	0	0	0	0	0	0	0
9	1	3	0	99	0	2	19	0	82.2	82.6	149	82.4	25.2232	55.998	118	74	160	67	83	48	83	2	0	1	0	0	0	0	0	0	0	0	0	0	0	0	0	0	0	0	0	0	0	0	0	0	0	0	0
5	2	3	0	99	10	1	18	0	87.3	86.5	173	86.9	23.9814	71.774	137	61	157	45	89	114	94	1	0	0	0	0	0	0	0	0	0	0	0	1	1	0	0	0	0	1	1	0	0	1	0	0	1	2	0
2	3	2	0	99	0	2	19	0	68.8	68	159	68.4	17.2893	43.709	94	66	168	67	85	79	91	2	0	0	0	0	0	0	0	0	0	0	0	0	0	0	0	0	0	0	0	0	0	0	0	0	0	0	0
4	3	5	0	99	0	2	19	0	84.5	83.7	149	84.1	27.4172	60.869	109	73	150	51	83	80	90	2	0	1	0	0	0	0	0	0	0	0	0	0	0	0	0	0	0	0	0	0	0	0	0	0	0	0	0
5	1	0	1	1	23	1	18	0	98.5	99.2	179.5	98.85	26.7006	86.03	134	73	150	46	91	67	94	1	0	1	0	0	0	0	0	1	0	0	0	0	1	0	1	0	0	0	1	0	1	1	0	0	0	2	0
2	2	3	0	99	6	1	19	0	104	103.6	176	103.8	30.3716	94.079	123	69	125	38	72	77	86	2	0	1	1	0	0	0	1	1	0	0	1	0	2	0	1	0	1	0	2	0	1	0	0	1	0	2	0
2	3	2	0	99	10	1	18	0	68.5	68.3	160.8	68.4	16.3915	42.383	114	61	130	47	64	96	98	1	0	0	0	0	0	0	0	0	0	0	0	0	0	0	0	0	0	0	0	0	0	0	0	0	0	0	0
2	3	4	0	99	8	1	19	0	79.9	80.8	171	80.35	23.1097	67.575	120	71	154	52	75	134	85	2	0	0	0	0	0	0	0	0	0	0	0	1	1	0	0	0	0	1	1	0	0	0	0	0	1	1	0
2	1	99	0	99	18	1	19	0	73.7	74.2	165.5	73.95	19.1229	52.378	117	68	146	50	84	60	88	2	0	0	0	0	0	0	0	0	0	0	0	0	0	0	0	0	0	0	0	0	0	0	0	0	0	0	0
2	3	3	0	99	0	2	18	0	74.9	74.9	155	74.9	17.5763	42.227	99	60	140	52	74	69	88	1	0	0	0	0	0	0	0	0	0	0	0	0	0	0	0	0	0	0	0	0	0	0	0	0	0	0	0
2	3	4	0	99	6	1	19	0	82.7	82.5	176	82.6	18.6154	57.663	132	80	152	43	87	112	119	2	1	0	0	0	0	0	1	0	1	0	0	1	2	0	0	1	1	1	3	1	0	1	1	0	1	3	1
2	1	5	0	99	0	1	18	0	81.4	81.2	178.2	81.3	20.3368	64.58	115	71	151	48	85	88	85	1	0	0	0	0	0	0	0	0	0	0	0	0	0	0	0	0	0	0	0	0	0	0	0	0	0	0	0
2	1	4	0	99	18	1	19	0	88.2	87.5	189	87.85	19.8435	70.883	118	75	151	49	88	68	86	2	0	0	0	0	0	0	0	0	0	0	0	0	0	0	0	0	0	0	0	0	0	0	0	0	0	0	0
2	3	99	0	99	0	2	19	0	86.5	86.3	166.2	86.4	23.9454	66.143	108	68	192	52	119	106	76	2	0	1	0	0	0	0	0	0	0	0	0	0	0	0	1	0	0	1	2	0	0	0	0	0	0	0	0
2	2	5	0	99	22	2	19	0	89	88	159	88.5	24.6209	62.244	105	67	201	62	128	54	148	2	1	1	0	0	0	0	1	0	1	0	0	0	1	0	1	1	0	0	2	0	0	0	1	0	0	1	0
2	3	5	0	99	0	2	19	0	97.3	98.3	159.5	97.8	29.5225	75.106	126	78	212	50	148	69	88	2	0	1	0	0	0	0	0	1	0	0	0	0	1	0	1	0	0	0	1	0	1	0	0	0	0	1	0
2	1	99	0	99	15	1	19	0	82.7	83	168.3	82.85	24.602	69.685	128	63	161	47	87	136	94	2	0	0	0	0	0	0	0	0	0	0	0	1	1	0	0	0	0	1	1	0	0	0	0	0	1	1	0
2	3	2	1	0	11	1	19	0	82	81.5	175	81.75	19.9386	61.062	112	67	186	45	119	111	97	2	0	0	0	0	0	0	0	0	0	0	0	1	1	0	0	0	0	1	1	0	0	0	0	0	1	1	0
2	3	99	0	99	10	2	19	0	70.6	70	163.5	70.3	17.4116	46.545	98	65	116	52	48	79	118	2	1	0	0	0	0	0	1	0	1	0	0	0	1	0	0	1	0	0	1	0	0	0	1	0	0	1	0
2	3	4	0	99	8	2	18	0	80.8	81.5	155	81.15	20.6801	49.684	98	69	220	35	163	108	87	1	0	1	1	0	0	0	1	0	0	0	1	0	1	0	0	0	1	1	2	0	0	0	0	1	0	1	0
2	1	99	0	99	8	1	19	0	72.6	72.7	168.7	72.65	17.7374	50.48	138	80	130	46	72	61	89	2	0	0	0	0	0	0	0	0	0	0	0	0	0	0	0	0	0	0	0	0	0	1	0	0	0	1	0
4	3	4	0	99	0	2	19	0	73.8	72.8	155	73.3	19.7856	47.535	119	75	140	54	78	40	119	2	1	0	0	0	0	0	1	0	1	0	0	0	1	0	0	1	0	0	1	0	0	0	1	0	0	1	0
5	3	3	0	99	0	1	19	0	83.1	82.3	171	82.7	23.3306	68.221	123	63	96	43	45	40	93	2	0	0	0	0	0	0	0	0	0	0	0	0	0	0	0	0	1	0	1	0	0	0	0	0	0	0	0
2	1	99	0	99	3	2	19	0	90.2	91.2	156	90.7	26.1082	63.537	117	80	179	47	115	86	82	2	0	1	1	0	0	0	1	0	0	0	0	0	0	0	1	0	1	0	2	0	0	1	0	0	0	1	0
2	3	2	1	0	4	1	19	0	79	79.8	178.5	79.4	18.2799	58.244	132	79	160	48	102	51	101	2	1	0	0	0	0	0	1	0	0	0	0	0	0	0	0	0	0	0	0	0	0	1	0	0	0	1	0
2	2	4	0	99	15	2	19	0	95.8	96.4	172.1	96.1	29.6454	87.805	114	65	152	55	79	92	82	2	0	1	0	0	0	0	0	1	0	0	0	0	1	0	1	0	0	0	1	0	1	0	0	0	0	1	0
2	3	99	0	99	7	2	19	0	77.3	76.6	160.1	76.95	21.6577	55.513	113	76	165	47	104	72	92	2	0	0	1	0	0	0	1	0	0	0	0	0	0	0	0	0	1	0	1	0	0	0	0	0	0	0	0
2	2	5	0	99	0	1	19	0	80.5	80.5	181.4	80.5	20.8549	68.625	110	64	202	52	141	47	84	2	0	0	0	0	0	0	0	0	0	0	0	0	0	0	0	0	0	0	0	0	0	0	0	0	0	0	0
2	3	4	0	99	8	1	18	0	81.8	81.5	176.2	81.65	20.7454	64.407	132	83	149	45	93	55	96	1	0	0	0	0	0	0	0	0	0	0	0	0	0	0	0	0	0	0	0	0	0	1	0	0	0	1	0
10	3	5	1	1	14	1	18	0	91.9	91.6	186	91.75	22.3798	77.425	120	69	230	30	106	470	85	1	0	0	1	1	0	0	2	0	0	0	1	1	2	0	1	0	1	1	3	1	0	0	0	1	1	2	0
2	3	4	0	99	0	2	19	0	79.4	79.2	155.2	79.3	21.5714	51.959	103	70	143	45	87	55	86	2	0	0	1	0	0	0	1	0	0	0	0	0	0	0	0	0	1	0	1	0	0	0	0	0	0	0	0
2	3	99	0	99	0	1	18	0	82.9	82.8	176	82.85	21.5725	66.823	108	80	151	54	88	44	79	1	0	0	0	0	0	0	0	0	0	0	0	0	0	0	0	0	0	0	0	0	0	1	0	0	0	1	0
2	2	3	1	0	0	1	19	0	81.3	80.6	161.8	80.95	23.0603	60.37	105	60	160	47	97	78	82	2	0	0	0	0	0	0	0	0	0	0	0	0	0	0	0	0	0	0	0	0	0	0	0	0	0	0	0
2	2	4	0	99	3	2	19	0	83.2	83.7	159.5	83.45	21.4212	54.496	96	58	220	75	125	101	125	2	1	1	0	0	0	0	1	0	1	0	0	0	1	0	0	1	0	1	2	0	0	0	1	0	0	1	0
4	3	3	0	99	0	2	19	0	101.3	101.7	162	101.5	34.3477	90.142	124	79	124	39	65	98	88	2	0	1	1	0	0	0	1	1	0	0	1	0	2	0	1	0	1	0	2	0	1	0	0	1	0	2	0
2	3	4	0	99	15	1	19	0	88	88	177.5	88	22.6155	71.253	138	74	170	45	99	132	93	2	0	0	0	0	0	0	0	0	0	0	0	1	1	0	0	0	0	1	1	0	0	1	0	0	1	2	0
4	3	3	0	99	0	1	18	0	73.7	73.7	162.5	73.7	18.5668	49.028	120	81	201	55	125	104	89	1	0	0	0	0	0	0	0	0	0	0	0	0	0	0	0	0	0	1	1	0	0	1	0	0	0	1	0
5	1	2	1	1	10	1	19	0	79.6	79.8	161	79.7	21.1385	54.793	109	67	151	69	73	43	90	2	0	0	0	0	0	0	0	0	0	0	0	0	0	0	0	0	0	0	0	0	0	0	0	0	0	0	0
5	1	4	0	99	0	1	19	0	79.5	80.1	173	79.8	21.4354	64.154	121	60	142	45	87	51	84	2	0	0	0	0	0	0	0	0	0	0	0	0	0	0	0	0	0	0	0	0	0	0	0	0	0	0	0
5	3	4	0	99	6	2	18	0	69.8	70.7	151	70.25	20.7631	47.342	103	69	153	62	84	33	85	1	0	0	0	0	0	0	0	0	0	0	0	0	0	0	0	0	0	0	0	0	0	0	0	0	0	0	0
2	3	5	0	99	22	1	19	0	80.3	80.6	164	80.45	21.4523	57.698	128	75	160	34	109	84	93	2	0	0	1	0	0	0	1	0	0	0	1	0	1	0	0	0	1	0	1	0	0	0	0	1	0	1	0
2	1	3	0	99	3	2	19	0	82.8	82.3	167	82.55	25.0278	69.8	119	72	185	61	103	103	80	2	0	1	0	0	0	0	0	0	0	0	0	0	0	0	0	0	0	1	1	0	0	0	0	0	0	0	0
5	1	3	0	99	0	2	19	0	86.6	85.6	158	86.1	25.9025	64.663	115	75	184	56	118	48	82	2	0	1	0	0	0	0	0	0	0	0	0	0	0	0	1	0	0	0	1	0	0	0	0	0	0	0	0
5	2	5	0	99	0	1	19	0	77.8	77.6	168.5	77.7	18.5938	52.792	114	77	167	57	95	76	94	2	0	0	0	0	0	0	0	0	0	0	0	0	0	0	0	0	0	0	0	0	0	0	0	0	0	0	0
5	3	4	0	99	9	1	19	0	94.6	94.4	168	94.5	24.8473	70.129	120	77	123	41	64	92	86	2	0	1	0	0	0	0	0	0	0	0	0	0	0	0	1	0	1	0	2	0	0	0	0	0	0	0	0
4	3	4	0	99	0	2	19	0	84.1	84.1	160.5	84.1	23.4237	60.34	117	72	248	74	141	165	88	2	0	1	0	1	0	0	1	0	0	0	0	1	1	0	0	0	0	1	1	0	0	0	0	0	1	1	0
2	3	2	1	0	24	2	19	0	90.5	91	158	90.75	28.0925	70.13	118	72	177	69	96	61	108	2	1	1	0	0	0	0	1	0	0	0	0	0	0	0	1	0	0	0	1	0	0	0	0	0	0	0	0
5	3	4	0	99	0	1	19	0	91.7	91.8	173	91.75	26.9063	80.528	119	80	156	37	68	253	93	2	0	0	1	1	0	0	2	0	0	0	1	1	2	0	1	0	1	1	3	1	0	1	0	1	1	3	1
2	3	99	0	99	3	2	18	0	90.2	90.7	151	90.45	27.7979	63.382	121	78	194	68	115	53	93	1	0	1	0	0	0	0	0	0	0	0	0	0	0	0	1	0	0	0	1	0	0	0	0	0	0	0	0
2	3	4	0	99	0	1	19	0	86.8	86.2	187	86.5	21.2008	74.137	117	72	128	52	64	59	87	2	0	0	0	0	0	0	0	0	0	0	0	0	0	0	0	0	0	0	0	0	0	0	0	0	0	0	0
2	3	5	0	99	6	2	18	0	64	64	162	64	16.2262	42.584	96	67	153	61	81	55	82	1	0	0	0	0	0	0	0	0	0	0	0	0	0	0	0	0	0	0	0	0	0	0	0	0	0	0	0
9	3	2	0	99	1	2	19	0	80.3	80.7	161.5	80.5	21.533	56.163	115	71	184	47	99	190	97	2	0	1	1	1	0	1	2	0	0	0	0	1	1	0	0	0	1	1	2	0	0	0	0	0	1	1	0
2	1	2	1	1	5	1	19	0	105.8	106.8	166.5	106.3	33.6109	93.177	146	87	154	48	88	91	97	2	0	1	0	0	1	0	1	1	0	0	0	0	1	0	1	0	0	0	1	0	1	1	0	0	0	2	0
2	3	3	0	99	0	2	18	0	91.4	91.7	169	91.55	25.9343	74.071	92	56	126	46	72	42	72	1	0	1	1	0	0	0	1	0	0	0	0	0	0	0	1	0	1	0	2	0	0	0	0	0	0	0	0
5	2	2	0	99	2	2	19	0	85.9	85.2	170	85.55	23.9066	69.09	116	68	144	38	84	112	92	2	0	1	1	0	0	0	1	0	0	0	1	1	2	0	0	0	1	1	2	0	0	0	0	1	1	2	0
9	3	3	0	99	0	1	19	0	108	108.2	175.5	108.1	32.5075	100.124	137	74	195	38	139	89	105	2	1	1	1	0	0	1	2	1	0	0	1	0	2	0	1	0	1	0	2	0	1	1	0	1	0	3	1
2	1	3	0	99	1	2	19	0	69.7	69.9	159.5	69.8	15.7011	39.944	101	72	141	49	80	59	93	2	0	0	1	0	0	0	1	0	0	0	0	0	0	0	0	0	1	0	1	0	0	0	0	0	0	0	0
5	3	2	0	99	4	1	19	0	78	78.8	174	78.4	19.0038	57.536	114	69	193	64	114	74	89	2	0	0	0	0	0	0	0	0	0	0	0	0	0	0	0	0	0	0	0	0	0	0	0	0	0	0	0
5	1	2	0	99	0	2	19	0	80.6	79.8	162.2	80.2	21.3571	56.188	104	65	144	52	69	117	99	2	0	1	0	0	0	0	0	0	0	0	0	1	1	0	0	0	0	1	1	0	0	0	0	0	1	1	0
5	2	1	0	99	19	2	19	0	73.2	72.9	161	73.05	18.3685	47.613	91	58	137	53	74	51	102	2	1	0	0	0	0	0	1	0	0	0	0	0	0	0	0	0	0	0	0	0	0	0	0	0	0	0	0
2	3	4	0	99	0	1	19	0	84.3	83.7	175	84	19.9762	61.177	139	61	166	31	105	151	95	2	0	0	1	1	0	0	2	0	0	0	1	1	2	0	0	0	1	1	2	0	0	1	0	1	1	3	1
4	1	4	0	99	0	1	18	0	93.4	93.7	161	93.55	26.4442	68.546	131	78	103	33	47	116	99	1	0	0	1	0	0	0	1	0	0	0	1	1	2	0	1	0	1	1	3	1	0	1	0	1	1	3	1
2	2	4	0	99	0	2	19	0	75.4	75	159.5	75.2	19.4762	49.548	108	77	129	56	66	36	75	2	0	0	0	0	0	0	0	0	0	0	0	0	0	0	0	0	0	0	0	0	0	0	0	0	0	0	0
2	1	3	0	99	19	1	19	0	84.5	84.7	168	84.6	21.2454	59.963	128	73	110	45	53	61	95	2	0	0	0	0	0	0	0	0	0	0	0	0	0	0	0	0	0	0	0	0	0	0	0	0	0	0	0
9	3	3	0	99	7	2	18	0	76.7	77.6	152	77.15	22.0884	51.033	97	62	190	50	121	97	95	1	0	0	0	0	0	0	0	0	0	0	0	0	0	0	0	0	0	0	0	0	0	0	0	0	0	0	0
5	3	2	0	99	16	1	19	0	79.6	79.5	171.2	79.55	19.158	56.151	112	64	132	44	62	130	89	2	0	0	0	0	0	0	0	0	0	0	0	1	1	0	0	0	1	1	2	0	0	0	0	0	1	1	0
5	3	4	0	99	0	2	19	0	96.6	95.7	162	96.15	29.7333	78.032	134	84	189	63	109	83	91	2	0	1	0	0	0	0	0	1	0	0	0	0	1	0	1	0	0	0	1	0	1	1	0	0	0	2	0
2	2	5	0	99	0	2	19	0	85.4	85.4	163.5	85.4	23.6811	63.305	110	60	160	60	90	49	100	2	1	1	0	0	0	0	1	0	0	0	0	0	0	0	0	0	0	0	0	0	0	0	0	0	0	0	0
5	2	3	0	99	0	2	19	0	73.8	73.4	170.5	73.6	15.7219	45.704	103	58	153	54	88	54	81	2	0	0	0	0	0	0	0	0	0	0	0	0	0	0	0	0	0	0	0	0	0	0	0	0	0	0	0
2	2	99	0	99	1	2	18	0	81.9	82.3	160.5	82.1	23.6026	60.801	101	63	154	52	89	66	84	1	0	1	0	0	0	0	0	0	0	0	0	0	0	0	0	0	0	0	0	0	0	0	0	0	0	0	0
2	3	4	0	99	0	1	19	0	74.6	75	174	74.8	17.6414	53.411	105	69	134	51	71	61	90	2	0	0	0	0	0	0	0	0	0	0	0	0	0	0	0	0	0	0	0	0	0	0	0	0	0	0	0
2	3	99	0	99	0	1	19	0	74.2	73.7	180.5	73.95	18.9339	61.687	115	77	125	48	67	51	85	2	0	0	0	0	0	0	0	0	0	0	0	0	0	0	0	0	0	0	0	0	0	0	0	0	0	0	0
2	3	5	0	99	0	2	18	0	96.9	96.2	175	96.55	28.9861	88.77	113	71	136	39	80	85	91	1	0	1	1	0	0	0	1	1	0	0	1	0	2	0	1	0	1	0	2	0	1	0	0	1	0	2	0
2	2	99	0	99	5	2	19	0	80.5	81	153	80.75	20.3234	47.575	126	74	176	45	101	150	91	2	0	1	1	1	0	1	2	0	0	0	0	1	1	0	0	0	1	1	2	0	0	0	0	0	1	1	0
2	3	2	0	99	0	2	19	0	89.9	89.9	164.5	89.9	25.1158	67.964	112	65	180	53	114	63	80	2	0	1	0	0	0	0	0	0	0	0	0	0	0	0	1	0	0	0	1	0	0	0	0	0	0	0	0
2	1	5	0	99	0	2	19	0	85.8	85.4	167.6	85.6	22.1255	62.15	112	68	115	46	52	85	83	2	0	1	1	0	0	0	1	0	0	0	0	0	0	0	0	0	1	0	1	0	0	0	0	0	0	0	0
2	3	5	0	99	0	1	19	0	81.8	82.2	179	82	19.2859	61.794	113	66	120	36	72	58	91	2	0	0	1	0	0	0	1	0	0	0	1	0	1	0	0	0	1	0	1	0	0	0	0	1	0	1	0
2	3	5	1	0	7	2	18	0	75.2	75.2	163.7	75.2	19.0039	50.926	107	70	165	59	91	77	81	1	0	0	0	0	0	0	0	0	0	0	0	0	0	0	0	0	0	0	0	0	0	0	0	0	0	0	0
2	1	4	0	99	0	2	18	0	92	92.1	164	92.05	27.5989	74.23	103	65	185	46	119	101	90	1	0	1	1	0	0	0	1	1	0	0	0	0	1	0	1	0	1	1	3	1	1	0	0	0	0	1	0
2	99	4	1	0	0	1	19	0	99.5	100.2	169.5	99.85	29.454	84.622	140	94	174	36	21	566	104	2	1	1	1	1	1	1	4	1	0	0	1	1	3	1	1	0	1	1	3	1	1	1	0	1	1	4	1
2	3	99	0	99	0	1	19	0	81	80.7	165.5	80.85	21.0122	57.553	116	72	135	40	79	82	89	2	0	0	0	0	0	0	0	0	0	0	1	0	1	0	0	0	1	0	1	0	0	0	0	1	0	1	0
2	1	1	0	99	0	1	19	0	76	76.4	178.7	76.2	19.4797	62.206	117	66	129	49	67	67	92	2	0	0	0	0	0	0	0	0	0	0	0	0	0	0	0	0	0	0	0	0	0	0	0	0	0	0	0
2	3	4	0	99	0	1	18	0	88	87.6	161.5	87.8	25.7923	67.272	126	84	204	53	126	125	81	1	0	0	0	0	0	0	0	0	0	0	0	1	1	0	0	0	0	1	1	0	0	1	0	0	1	2	0
2	3	4	0	99	19	2	18	0	75.7	75.9	151	75.8	20.2618	46.199	89	59	154	52	90	60	86	1	0	0	0	0	0	0	0	0	0	0	0	0	0	0	0	0	0	0	0	0	0	0	0	0	0	0	0
5	2	1	0	99	0	1	18	0	83.8	84.4	175.5	84.1	20.6703	63.665	116	70	122	55	54	66	95	1	0	0	0	0	0	0	0	0	0	0	0	0	0	0	0	0	0	0	0	0	0	0	0	0	0	0	0
9	3	2	0	99	7	2	19	0	75.8	75.9	151.8	75.85	22.0642	50.843	108	69	150	55	83	60	84	2	0	0	0	0	0	0	0	0	0	0	0	0	0	0	0	0	0	0	0	0	0	0	0	0	0	0	0
2	2	2	0	99	0	1	19	0	78.3	78.6	169	78.45	20.4282	58.345	113	56	160	51	91	88	112	2	1	0	0	0	0	0	1	0	1	0	0	0	1	0	0	1	0	0	1	0	0	0	1	0	0	1	0
9	2	1	0	99	19	1	19	0	82.8	82.8	173	82.8	23.1939	69.417	123	76	127	46	66	74	91	2	0	0	0	0	0	0	0	0	0	0	0	0	0	0	0	0	0	0	0	0	0	0	0	0	0	0	0
2	3	3	0	99	4	1	19	0	84.4	84	183.5	84.2	19.9116	67.047	115	65	141	66	56	93	126	2	1	0	0	0	0	0	1	0	1	0	0	0	1	0	0	1	0	0	1	0	0	0	1	0	0	1	0
2	3	2	0	99	0	2	19	0	73.9	73.7	169	73.8	19.1331	54.646	102	65	143	56	75	62	96	2	0	0	0	0	0	0	0	0	0	0	0	0	0	0	0	0	0	0	0	0	0	0	0	0	0	0	0
5	3	0	0	99	0	2	19	0	81.3	82.2	178.7	81.75	18.42	58.822	93	57	167	55	95	84	97	2	0	1	0	0	0	0	0	0	0	0	0	0	0	0	0	0	0	0	0	0	0	0	0	0	0	0	0
2	1	3	0	99	12	2	19	0	85.8	86.1	159	85.95	26.2498	66.362	104	64	200	35	126	193	94	2	0	1	1	1	0	1	2	0	0	0	1	1	2	0	1	0	1	1	3	1	0	0	0	1	1	2	0
5	3	2	0	99	9	2	19	0	84.8	85.5	159	85.15	22.1119	55.901	108	75	226	57	140	145	85	2	0	1	0	0	0	0	0	0	0	0	0	1	1	0	0	0	0	1	1	0	0	0	0	0	1	1	0
2	3	99	0	99	0	1	18	0	85.5	86.2	174	85.85	22.9717	69.549	128	76	124	42	71	53	119	1	1	0	0	0	0	0	1	0	1	0	0	0	1	0	0	1	1	0	2	0	0	0	1	0	0	1	0
10	3	3	0	99	0	2	19	0	68.9	68.3	161	68.6	16.6521	43.164	105	74	252	60	170	109	83	2	0	0	0	0	0	0	0	0	0	0	0	0	0	0	0	0	0	1	1	0	0	0	0	0	0	0	0
4	1	99	0	99	0	2	19	0	93.2	92.9	169	93.05	26.6902	76.23	98	65	177	59	108	49	96	2	0	1	0	0	0	0	0	1	0	0	0	0	1	0	1	0	0	0	1	0	1	0	0	0	0	1	0
2	3	4	0	99	0	2	19	0	76.4	75.9	151.5	76.15	23.7837	54.589	107	70	16.2	48	99	76	82	2	0	0	1	0	0	0	1	0	0	0	0	0	0	0	0	0	1	0	1	0	0	0	0	0	0	0	0
2	3	99	0	99	0	1	19	0	79.7	79.2	170.5	79.45	22.424	65.187	120	74	152	45	76	153	94	2	0	0	0	1	0	0	1	0	0	0	0	1	1	0	0	0	0	1	1	0	0	0	0	0	1	1	0
2	3	2	0	99	0	1	19	0	84.8	84.6	169.5	84.7	22.7266	65.294	111	69	135	42	82	57	109	2	1	0	0	0	0	0	1	0	0	0	0	0	0	0	0	0	1	0	1	0	0	0	0	0	0	0	0
2	2	4	0	99	0	1	19	0	75.6	76.2	173	75.9	18.6976	55.96	123	76	133	55	70	41	82	2	0	0	0	0	0	0	0	0	0	0	0	0	0	0	0	0	0	0	0	0	0	0	0	0	0	0	0
2	1	3	0	99	14	2	19	0	83.8	83.5	161	83.65	24.1094	62.494	113	85	134	50	72	60	95	2	0	1	0	0	0	0	0	0	0	0	0	0	0	0	0	0	0	0	0	0	0	1	0	0	0	1	0
2	3	3	0	99	2	2	19	0	75.1	75.3	162.5	75.2	20.4671	54.046	109	65	146	62	70	70	94	2	0	0	0	0	0	0	0	0	0	0	0	0	0	0	0	0	0	0	0	0	0	0	0	0	0	0	0
2	3	4	0	99	5	1	19	0	71.9	72	165.4	71.95	17.8699	48.887	104	74	141	57	77	35	73	2	0	0	0	0	0	0	0	0	0	0	0	0	0	0	0	0	0	0	0	0	0	0	0	0	0	0	0
2	3	3	0	99	11	2	19	0	100.8	101.7	163	101.25	33.7995	89.802	117	77	239	53	169	83	87	2	0	1	0	0	0	0	0	1	0	0	0	0	1	0	1	0	0	0	1	0	1	0	0	0	0	1	0
2	3	2	0	99	0	1	19	0	92.8	92.9	174	92.85	24.924	75.46	119	72	123	46	61	81	82	2	0	0	0	0	0	0	0	0	0	0	0	0	0	0	1	0	0	0	1	0	0	0	0	0	0	0	0
2	2	99	0	99	0	1	19	0	78.3	78.4	169.5	78.35	21.1707	60.824	117	73	137	50	77	52	94	2	0	0	0	0	0	0	0	0	0	0	0	0	0	0	0	0	0	0	0	0	0	0	0	0	0	0	0
2	3	4	1	0	0	1	18	0	77.6	78.1	175.3	77.85	21.0234	64.605	127	68	148	51	80	85	90	1	0	0	0	0	0	0	0	0	0	0	0	0	0	0	0	0	0	0	0	0	0	0	0	0	0	0	0
4	3	5	0	99	0	2	18	0	69.6	70.2	155.4	69.9	17.478	42.208	91	62	131	52	65	69	107	1	1	0	0	0	0	0	1	0	0	0	0	0	0	0	0	0	0	0	0	0	0	0	0	0	0	0	0
4	3	5	0	99	0	2	18	0	71.5	71.2	153.5	71.35	18.6116	43.853	93	60	124	48	62	71	95	1	0	0	1	0	0	0	1	0	0	0	0	0	0	0	0	0	1	0	1	0	0	0	0	0	0	0	0
2	2	99	0	99	0	1	19	0	86	86.8	171.8	86.4	23.2602	68.653	120	74	198	51	130	84	98	2	0	0	0	0	0	0	0	0	0	0	0	0	0	0	0	0	0	0	0	0	0	0	0	0	0	0	0
2	3	4	0	99	0	1	19	0	94.7	94.8	175.5	94.75	25.7215	79.223	125	76	190	57	120	67	83	2	0	1	0	0	0	0	0	1	0	0	0	0	1	0	1	0	0	0	1	0	1	0	0	0	0	1	0
2	3	5	0	99	0	1	18	0	77	78	176	77.5	19.9025	61.65	112	72	127	42	58	84	98	1	0	0	0	0	0	0	0	0	0	0	0	0	0	0	0	0	1	0	1	0	0	0	0	0	0	0	0
2	3	4	1	0	12	2	19	0	82.3	82.6	159	82.45	23.4619	59.314	103	67	127	43	70	72	14	2	0	1	1	0	0	0	1	0	0	0	0	0	0	0	0	0	1	0	1	0	0	0	0	0	0	0	0
2	3	4	0	99	0	2	19	0	67.9	67.7	155	67.8	16.5723	39.815	103	68	215	56	139	99	102	2	1	0	0	0	0	0	1	0	0	0	0	0	0	0	0	0	0	0	0	0	0	0	0	0	0	0	0
5	1	2	0	99	4	2	19	0	79.2	79.2	155.6	79.2	21.1731	51.263	107	67	169	82	75	61	90	2	0	0	0	0	0	0	0	0	0	0	0	0	0	0	0	0	0	0	0	0	0	0	0	0	0	0	0
5	3	2	0	99	0	1	18	0	80.4	79.4	171.7	79.9	20.7663	61.221	111	72	159	45	99	74	87	1	0	0	0	0	0	0	0	0	0	0	0	0	0	0	0	0	0	0	0	0	0	0	0	0	0	0	0
2	3	3	0	99	0	2	19	0	83.3	82.6	156.5	82.95	21.0295	51.506	111	80	198	69	114	73	95	2	0	1	0	0	0	0	0	0	0	0	0	0	0	0	0	0	0	0	0	0	0	1	0	0	0	1	0
9	3	3	0	99	7	2	18	0	98.9	98.6	159	98.75	28.7516	72.687	116	74	138	41	85	60	86	1	0	1	1	0	0	0	1	1	0	0	0	0	1	0	1	0	1	0	2	0	1	0	0	0	0	1	0
2	3	4	1	0	0	1	18	0	75.7	75.8	172	75.75	16.9091	50.024	99	58	172	41	102	143	76	1	0	0	0	0	0	0	0	0	0	0	0	1	1	0	0	0	1	1	2	0	0	0	0	0	1	1	0
2	3	4	0	99	9	1	19	0	77.2	77.3	172	77.25	18.0719	53.464	119	70	120	35	63	110	107	2	1	0	1	0	0	0	2	0	0	0	1	1	2	0	0	0	1	1	2	0	0	0	0	1	1	2	0
2	2	4	1	1	7	1	18	0	77.4	77.2	176.6	77.3	20.0003	62.376	124	78	183	47	118	92	97	1	0	0	0	0	0	0	0	0	0	0	0	0	0	0	0	0	0	0	0	0	0	0	0	0	0	0	0
2	1	2	0	99	0	2	19	0	83.5	83.8	162	83.65	23.6008	61.938	106	70	153	53	83	87	92	2	0	1	0	0	0	0	0	0	0	0	0	0	0	0	0	0	0	0	0	0	0	0	0	0	0	0	0
2	3	5	0	99	14	1	19	0	98.7	99	193.2	98.85	25.866	96.548	130	64	137	56	70	56	90	2	0	1	0	0	0	0	0	1	0	0	0	0	1	0	1	0	0	0	1	0	1	0	0	0	0	1	0
2	3	3	1	1	12	1	19	0	85	84.2	181	84.6	19.1059	62.593	120	74	142	53	61	142	77	2	0	0	0	0	0	0	0	0	0	0	0	1	1	0	0	0	0	1	1	0	0	0	0	0	1	1	0
2	3	5	0	99	14	2	19	0	84.5	84	165.5	84.25	23.4565	64.248	95	64	133	46	85	58	91	2	0	1	1	0	0	0	1	0	0	0	0	0	0	0	0	0	1	0	1	0	0	0	0	0	0	0	0
2	2	4	0	99	0	1	19	0	76.6	76.5	181.5	76.55	17.9438	59.111	110	71	122	49	61	58	73	2	0	0	0	0	0	0	0	0	0	0	0	0	0	0	0	0	0	0	0	0	0	0	0	0	0	0	0
2	3	5	0	99	0	1	19	0	69.7	69.8	161	69.75	18.3608	47.593	110	66	116	36	66	72	90	2	0	0	1	0	0	0	1	0	0	0	1	0	1	0	0	0	1	0	1	0	0	0	0	1	0	1	0
2	2	4	0	99	23	1	19	0	80.5	81.1	174.2	80.8	21.871	66.369	113	66	150	48	71	154	92	2	0	0	0	1	0	0	1	0	0	0	0	1	1	0	0	0	0	1	1	0	0	0	0	0	1	1	0
2	3	2	0	99	9	1	19	0	96.1	95.7	179.4	95.9	25.8225	83.108	140	83	131	32	71	141	117	2	1	1	1	0	0	1	2	1	1	0	1	1	4	1	1	1	1	1	4	1	1	1	1	1	1	5	1
2	3	99	0	99	15	2	19	0	75	74.4	156.4	74.7	20.6635	50.545	100	68	162	81	71	49	86	2	0	0	0	0	0	0	0	0	0	0	0	0	0	0	0	0	0	0	0	0	0	0	0	0	0	0	0
2	3	4	0	99	0	2	19	0	97.4	97.6	161.8	97.5	28.4703	74.533	106	71	151	47	89	74	85	2	0	1	1	0	0	0	1	1	0	0	0	0	1	0	1	0	1	0	2	0	1	0	0	0	0	1	0
2	3	5	0	99	3	2	19	0	80.7	79.9	155	80.3	23.076	55.44	102	62	193	44	128	106	87	2	0	1	1	0	0	0	1	0	0	0	0	0	0	0	0	0	1	1	2	0	0	0	0	0	0	0	0
2	3	3	0	99	0	1	19	0	78.9	78.7	176.1	78.8	19.3811	60.103	118	74	187	52	118	86	96	2	0	0	0	0	0	0	0	0	0	0	0	0	0	0	0	0	0	0	0	0	0	0	0	0	0	0	0
2	3	99	0	99	0	1	19	0	78	77.5	168.8	77.75	21.5885	61.513	118	66	108	36	60	60	90	2	0	0	1	0	0	0	1	0	0	0	1	0	1	0	0	0	1	0	1	0	0	0	0	1	0	1	0
2	3	5	1	1	0	1	18	0	72.3	71.9	168	72.1	18.5583	52.379	131	76	211	45	138	140	102	1	1	0	0	0	0	0	1	0	0	0	0	1	1	0	0	0	0	1	1	0	0	1	0	0	1	2	0
2	1	3	0	99	8	2	19	0	77.2	77.2	160	77.2	20.5906	52.712	130	78	104	54	42	41	99	2	0	0	0	0	0	0	0	0	0	0	0	0	0	0	0	0	0	0	0	0	0	0	0	0	0	0	0
2	3	99	0	99	0	2	19	0	90.6	89.9	159.5	90.25	26.4891	67.389	112	75	175	53	105	83	92	2	0	1	0	0	0	0	0	0	0	0	0	0	0	0	1	0	0	0	1	0	0	0	0	0	0	0	0
2	3	5	0	99	0	2	19	0	69	69.8	159.5	69.4	18.0611	45.948	103	72	149	53	84	62	91	2	0	0	0	0	0	0	0	0	0	0	0	0	0	0	0	0	0	0	0	0	0	0	0	0	0	0	0
2	3	2	0	99	0	1	19	0	88.4	89.3	169.5	88.85	23.8912	68.64	129	78	158	48	95	77	87	2	0	0	0	0	0	0	0	0	0	0	0	0	0	0	0	0	0	0	0	0	0	0	0	0	0	0	0
2	3	4	0	99	0	2	19	0	85.6	85.4	149	85.5	29.6	65.715	109	66	165	58	97	51	83	2	0	1	0	0	0	0	0	0	0	0	0	0	0	0	0	0	0	0	0	0	0	0	0	0	0	0	0
2	3	5	0	99	0	1	19	0	72.1	72.6	160	72.35	18.2984	46.844	113	70	163	45	100	91	100	2	1	0	0	0	0	0	1	0	0	0	0	0	0	0	0	0	0	0	0	0	0	0	0	0	0	0	0
2	3	2	0	99	0	1	19	0	76.1	76.9	173.4	76.5	19.5816	58.877	120	71	197	91	91	76	86	2	0	0	0	0	0	0	0	0	0	0	0	0	0	0	0	0	0	0	0	0	0	0	0	0	0	0	0
2	2	3	0	99	1	1	19	0	71.3	72.2	161	71.75	20.1832	52.317	106	69	120	37	69	72	96	2	0	0	1	0	0	0	1	0	0	0	1	0	1	0	0	0	1	0	1	0	0	0	0	1	0	1	0
2	3	4	0	99	0	1	19	0	98.7	98.3	188.5	98.5	28.354	100.748	144	94	164	47	98	95	100	2	1	1	0	0	1	1	2	1	0	0	0	0	1	0	1	0	0	0	1	0	1	1	0	0	0	2	0
2	1	5	0	99	0	2	19	0	75.6	76.2	166	75.9	17.729	48.854	97	62	174	53	105	80	84	2	0	0	0	0	0	0	0	0	0	0	0	0	0	0	0	0	0	0	0	0	0	0	0	0	0	0	0
2	1	4	0	99	0	1	19	0	97.1	96.9	172.5	97	29.1744	86.812	121	71	154	29	100	126	83	2	0	1	1	0	0	0	1	1	0	0	1	1	3	1	1	0	1	1	3	1	1	0	0	1	1	3	1
2	3	3	0	99	0	1	19	0	74.2	74.9	166	74.55	18.4751	50.91	107	68	127	44	70	63	88	2	0	0	0	0	0	0	0	0	0	0	0	0	0	0	0	0	1	0	1	0	0	0	0	0	0	0	0
2	99	2	0	99	14	2	19	0	88.9	87.9	164.8	88.4	22.1992	60.291	110	70	151	56	82	66	96	2	0	1	0	0	0	0	0	0	0	0	0	0	0	0	1	0	0	0	1	0	0	0	0	0	0	0	0
2	3	5	0	99	0	1	19	0	80.8	81.2	180	81	22.2349	72.041	133	74	160	43	85	161	85	2	0	0	0	1	0	0	1	0	0	0	0	1	1	0	0	0	1	1	2	0	0	1	0	0	1	2	0
5	2	99	0	99	5	1	19	0	73.1	73.2	166.5	73.15	19.7989	54.887	118	77	148	44	92	59	87	2	0	0	0	0	0	0	0	0	0	0	0	0	0	0	0	0	1	0	1	0	0	0	0	0	0	0	0
[truncated: 65 more rows]
[truncated: 14 more columns]
